# Supplementary material
Source: publisher figshare collection journal article supplement (https://geolsoc.figshare.com/ndownloader/files/14058350)
Supplement: Supplementary file 1 [file 14058350]

## Sheet: S
		Field Project
ID_FIELD	Haddington	Edinburgh	West Lothian	Western isles	Berwickshire	Fife	Ayre	NW Scotland	Date	MINORSAMPLENO_OFFSET	SAMPLE_NUMBERS				SAMPLE_DONOR_	SAMPLE_DONOR	ROCK_NAME	OLDNAME_PRESENT_IND	LOCALITY_DETAILS	SHEET_50K	MAP_REFERENCE	COUNTRY	STRATIGRAPHY	COMMENTS	YEAR_COLLECTED	BORENAME	SOBI_CONFIDENTIALITY	SAMPLE_CONFIDENTIALITY	EASTING	NORTHING	LINK TO BRITROCKS ENTRY	LINK TO PLANE POLARISED IMAGE	LINK TO CROSSED POLARS IMAGE	LINK TO PLANE POLARISED IMAGE (Second slide)	LINK TO CROSSED POLARS IMAGE (Second Slide)	LINK TO PLANE POLARISED IMAGE (Third slide)	LINK TO CROSSED POLARS IMAGE (Third Slide)	LINK TO PLANE POLARISED IMAGE (Fourth slide)	LINK TO CROSSED POLARS IMAGE (Fourth Slide)	LINK TO PLANE POLARISED IMAGE (Fifth slide)	LINK TO CROSSED POLARS IMAGE (Fifth Slide)
399525		X								0	S1	1	1	1	Geikie,A.	*	'Original entry: Teschenite'	1	Dolerite._x000D_Edinburgh (32)	Edinburgh (32)	NT 26 73			Salisbury crags				N	326000	673000	http://www.bgs.ac.uk/data/britrocks/britrocks.cfc?method=viewSamples&sampleId=399525	http://www.largeimages.bgs.ac.uk/iip/britrocks.html?id=110000/111457	http://www.largeimages.bgs.ac.uk/iip/britrocks.html?id=110000/111456
399526		X								0	S2	2	2	2	Geikie,A.	*	'Original entry: Olivine Basalt (Melaphyre)'	1	The Dasses._x000D_Edinburgh (32)	Edinburgh (32)	NT 274 735			Lion's haunch or dunsapie type				N	327400	673500	http://www.bgs.ac.uk/data/britrocks/britrocks.cfc?method=viewSamples&sampleId=399526	http://www.largeimages.bgs.ac.uk/iip/britrocks.html?id=110000/111459	http://www.largeimages.bgs.ac.uk/iip/britrocks.html?id=110000/111458
399527		X								0	S3	3	3	3	Geikie,A.	*	'Original entry: Teschenite, Margin'	1	Salisbury Crags._x000D_Edinburgh (32)	Edinburgh (32)	NT 272 728			Dolerite near junction with sandstone				N	327200	672800	http://www.bgs.ac.uk/data/britrocks/britrocks.cfc?method=viewSamples&sampleId=399527	http://www.largeimages.bgs.ac.uk/iip/britrocks.html?id=110000/111461	http://www.largeimages.bgs.ac.uk/iip/britrocks.html?id=110000/111460
399528		X								0	S4	4	4	4	Geikie,A.	*	'Original entry: Baked Sandy Shale'	1	Salisbury Crags._x000D_Edinburgh (32)	Edinburgh (32)	NT 272 728			"altered shale"				N	327200	672800	http://www.bgs.ac.uk/data/britrocks/britrocks.cfc?method=viewSamples&sampleId=399528	http://www.largeimages.bgs.ac.uk/iip/britrocks.html?id=110000/111463	http://www.largeimages.bgs.ac.uk/iip/britrocks.html?id=110000/111462
399529		X								0	S5; S5/A; S5/D;	5	5	5	Geikie,A.	*	'Original entry: Olivine Basalt'	1	Long Row._x000D_Edinburgh (32)	Edinburgh (32)	NT 275 735			Lion's haunch type. w & f "dolerite"				N	327500	673500	http://www.bgs.ac.uk/data/britrocks/britrocks.cfc?method=viewSamples&sampleId=399529	http://www.largeimages.bgs.ac.uk/iip/britrocks.html?id=110000/111465	http://www.largeimages.bgs.ac.uk/iip/britrocks.html?id=110000/111464	http://www.largeimages.bgs.ac.uk/iip/britrocks.html?id=110000/111467	http://www.largeimages.bgs.ac.uk/iip/britrocks.html?id=110000/111466	http://www.largeimages.bgs.ac.uk/iip/britrocks.html?id=110000/111469	http://www.largeimages.bgs.ac.uk/iip/britrocks.html?id=110000/111468
399530		X								0	S5a	5	5	5	Geikie,A.	*	'Original entry: Olivine Basalt'	1	Whinny Hill, Crow Hill Ridges, Arthur's Seat._x000D_Edinburgh (32)	Edinburgh (32)	NT 27 73			Doubtful type, f (mostly decomposed)				N	327000	673000	http://www.bgs.ac.uk/data/britrocks/britrocks.cfc?method=viewSamples&sampleId=399530
399531		X								0	S5b	5	5	5	Geikie,A.	*	'Original entry: Olivine Basalt'	1	Whinny Hill, Crow Hill Ridges, Arthur's Seat._x000D_Edinburgh (32)	Edinburgh (32)	NT 27 73			Jedburgh type f				N	327000	673000	http://www.bgs.ac.uk/data/britrocks/britrocks.cfc?method=viewSamples&sampleId=399531
399532		X								0	S5c	5	5	5	Geikie,A.	*	'Original entry: Olivine Basalt'	1	Whinny Hill, Crow Hill Ridges, Arthur's Seat._x000D_Edinburgh (32)	Edinburgh (32)	NT 27 73			Dalmeny type f				N	327000	673000	http://www.bgs.ac.uk/data/britrocks/britrocks.cfc?method=viewSamples&sampleId=399532
399533		X								0	S5d	5	5	5	Geikie,A.	*	'Original entry: Basalt'	1	Whinny Hill, Crow Hill Ridges, Arthur's Seat._x000D_Edinburgh (32)	Edinburgh (32)	NT 27 73			Dalmeny type f				N	327000	673000	http://www.bgs.ac.uk/data/britrocks/britrocks.cfc?method=viewSamples&sampleId=399533
399534		X								0	S6; S6/A; S6/B;	6	6	6	Geikie,A.	*	'Original entry: Olivine Dolerite'	1	Lion's Haunch, Arthur's Seat._x000D_Edinburgh (32)	Edinburgh (32)	NT 277 728			Lion's haunch type. w & f				N	327700	672800	http://www.bgs.ac.uk/data/britrocks/britrocks.cfc?method=viewSamples&sampleId=399534	http://www.largeimages.bgs.ac.uk/iip/britrocks.html?id=110000/111471	http://www.largeimages.bgs.ac.uk/iip/britrocks.html?id=110000/111470	http://www.largeimages.bgs.ac.uk/iip/britrocks.html?id=110000/111473	http://www.largeimages.bgs.ac.uk/iip/britrocks.html?id=110000/111472
399535		X								0	S7; S7/B;	7	7	7	Geikie,A.	*	'Original entry: Tuff'	1	Queen's Drive._x000D_Edinburgh (32)	Edinburgh (32)	NT 28 73			"newer ash"				N	328000	673000	http://www.bgs.ac.uk/data/britrocks/britrocks.cfc?method=viewSamples&sampleId=399535	http://www.largeimages.bgs.ac.uk/iip/britrocks.html?id=110000/111475	http://www.largeimages.bgs.ac.uk/iip/britrocks.html?id=110000/111474	http://www.largeimages.bgs.ac.uk/iip/britrocks.html?id=110000/111477	http://www.largeimages.bgs.ac.uk/iip/britrocks.html?id=110000/111476
399536		X								0	S8	8	8	8	Geikie,A.	*	'Original entry: Olivine Basalt'	1	Summit of Arthur's Seat._x000D_Edinburgh (32)	Edinburgh (32)	NT 2753 7294			Dalmeny type f				N	327530	672940	http://www.bgs.ac.uk/data/britrocks/britrocks.cfc?method=viewSamples&sampleId=399536	http://www.largeimages.bgs.ac.uk/iip/britrocks.html?id=110000/111479	http://www.largeimages.bgs.ac.uk/iip/britrocks.html?id=110000/111478
399537		X								0	S9	9	9	9	Geikie,A.	*	'Original entry: Tuff'	1	St Magdalene's._x000D_Edinburgh (32)	Edinburgh (32)	NT 0125 7700			"ash"				N	301250	677000	http://www.bgs.ac.uk/data/britrocks/britrocks.cfc?method=viewSamples&sampleId=399537	http://www.largeimages.bgs.ac.uk/iip/britrocks.html?id=110000/111481	http://www.largeimages.bgs.ac.uk/iip/britrocks.html?id=110000/111480
399538		X								0	S10	10	10	10	Geikie,A.	*	'Original entry: Analcime Olivine Dolerite'	1	Mons Hill._x000D_Edinburgh (32)	Edinburgh (32)	NT 155 785			Teschenite f				N	315500	678500	http://www.bgs.ac.uk/data/britrocks/britrocks.cfc?method=viewSamples&sampleId=399538	http://www.largeimages.bgs.ac.uk/iip/britrocks.html?id=110000/111483	http://www.largeimages.bgs.ac.uk/iip/britrocks.html?id=110000/111482
399539		X								0	S11	11	11	11	Geikie,A.	*	'Original entry: Quartz-Dolerite'	1	Ratho, about 8 miles W of Edinburgh._x000D_Edinburgh (32)	Edinburgh (32)	NT 13 71			Ratho type f				N	313000	671000	http://www.bgs.ac.uk/data/britrocks/britrocks.cfc?method=viewSamples&sampleId=399539	http://www.largeimages.bgs.ac.uk/iip/britrocks.html?id=110000/111485	http://www.largeimages.bgs.ac.uk/iip/britrocks.html?id=110000/111484
402421							X			0	S13	13	13	13	Geikie,A.	*	'Original entry: Decomposed Basalt Hht'	1	Rowanside Hills, Ardrossan._x000D_Kilmarnock (22)	Kilmarnock (22)	NS 23 46			Lava, calciferous sst age				N	223000	646000	http://www.bgs.ac.uk/data/britrocks/britrocks.cfc?method=viewSamples&sampleId=402421	http://www.largeimages.bgs.ac.uk/iip/britrocks.html?id=110000/111489	http://www.largeimages.bgs.ac.uk/iip/britrocks.html?id=110000/111488
399540		X								0	S14	14	14	14	Geikie,A.	*	'Original entry: Andesite'	1	Blackford Hill._x000D_Edinburgh (32)	Edinburgh (32)	NT 25 70			"porphyrite"				N	325000	670000	http://www.bgs.ac.uk/data/britrocks/britrocks.cfc?method=viewSamples&sampleId=399540	http://www.largeimages.bgs.ac.uk/iip/britrocks.html?id=110000/111491	http://www.largeimages.bgs.ac.uk/iip/britrocks.html?id=110000/111490
402422							X			0	S16	16	16	16	Geikie,A.	*		0	Glen Burn, Stevenston._x000D_Kilmarnock (22)	Kilmarnock (22)	NS 27 43			Calcareous pebble showing sponge spicules in fine-grained sandstone hht				N	227000	643000	http://www.bgs.ac.uk/data/britrocks/britrocks.cfc?method=viewSamples&sampleId=402422	http://www.largeimages.bgs.ac.uk/iip/britrocks.html?id=110000/111495	http://www.largeimages.bgs.ac.uk/iip/britrocks.html?id=110000/111494
347426							X			0	S17	17	17	17	Geikie,A.	*	'Original entry: Picrite'	1	Mauchline Hill._x000D_SCOTLAND._x000D_Ayr (14)	Ayr (14)	NS 5 2	SCOTLAND		Picrite, permian				N	250000	627000	http://www.bgs.ac.uk/data/britrocks/britrocks.cfc?method=viewSamples&sampleId=347426	http://www.largeimages.bgs.ac.uk/iip/britrocks.html?id=110000/111497	http://www.largeimages.bgs.ac.uk/iip/britrocks.html?id=110000/111496
375550				X						0	S18	18	18	18	Geikie,A.	*	'Original entry: Enstatite Dolerite'	1	NE of Arm's Lodge._x000D_SCOTLAND._x000D_Arran (Millport) (21)	Arran (Millport) (21)		SCOTLAND		Enstatite dolerite, dyke, tholeiite type				N			http://www.bgs.ac.uk/data/britrocks/britrocks.cfc?method=viewSamples&sampleId=375550	http://www.largeimages.bgs.ac.uk/iip/britrocks.html?id=110000/111499	http://www.largeimages.bgs.ac.uk/iip/britrocks.html?id=110000/111498
375150				X						0	S19	19	19	19	Geikie,A.	*	'Original entry: Pitchstone'	1	Lamlash Road._x000D_SCOTLAND._x000D_Arran (Millport) (21)	Arran (Millport) (21)		SCOTLAND		Pitchstone, microliths				N			http://www.bgs.ac.uk/data/britrocks/britrocks.cfc?method=viewSamples&sampleId=375150	http://www.largeimages.bgs.ac.uk/iip/britrocks.html?id=110000/111501	http://www.largeimages.bgs.ac.uk/iip/britrocks.html?id=110000/111500
375590				X						0	S20	20	20	20	Geikie,A.	*	'Original entry: Pitchstone'	1	Lamlash Road._x000D_SCOTLAND._x000D_Arran (Millport) (21)	Arran (Millport) (21)		SCOTLAND		Pitchstone				N			http://www.bgs.ac.uk/data/britrocks/britrocks.cfc?method=viewSamples&sampleId=375590	http://www.largeimages.bgs.ac.uk/iip/britrocks.html?id=110000/111503	http://www.largeimages.bgs.ac.uk/iip/britrocks.html?id=110000/111502
284400										0	S22	22	22	22	Geikie,A.	*	'Original entry: Granite And Mica Diorite'	1	Kemnay Quarries._x000D_SCOTLAND._x000D_Inverurie (76)	Inverurie (76)	NJ 737 170	SCOTLAND						N	373700	817000	http://www.bgs.ac.uk/data/britrocks/britrocks.cfc?method=viewSamples&sampleId=284400	http://www.largeimages.bgs.ac.uk/iip/britrocks.html?id=110000/111507	http://www.largeimages.bgs.ac.uk/iip/britrocks.html?id=110000/111506
378354				X						0	S26	26	26	26	Geikie,A.	*	'Original entry: Tholeiite'	1	Above Largs._x000D_SCOTLAND._x000D_Rothesay (29)	Rothesay (29)	NS 210 590	SCOTLAND		Tholeiite, bottom bed				N	221000	659000	http://www.bgs.ac.uk/data/britrocks/britrocks.cfc?method=viewSamples&sampleId=378354	http://www.largeimages.bgs.ac.uk/iip/britrocks.html?id=110000/111509	http://www.largeimages.bgs.ac.uk/iip/britrocks.html?id=110000/111508
377979				X						0	S27	27	27	27	Geikie,A.	*	'Original entry: Olivine Basalt'	1	Above Largs._x000D_SCOTLAND._x000D_Rothesay (29)	Rothesay (29)	NS 210 590	SCOTLAND		Olivine basalt, lowest trap				N	221000	659000	http://www.bgs.ac.uk/data/britrocks/britrocks.cfc?method=viewSamples&sampleId=377979	http://www.largeimages.bgs.ac.uk/iip/britrocks.html?id=110000/111511	http://www.largeimages.bgs.ac.uk/iip/britrocks.html?id=110000/111510
378355				X						0	S28	28	28	28	Geikie,A.	*	'Original entry: Tholeiite'	1	Largs Hill, road to Dalry._x000D_SCOTLAND._x000D_Rothesay (29)	Rothesay (29)	NS 213 584	SCOTLAND		Tholeiite, dolerite, dyke in trap				N	221300	658400	http://www.bgs.ac.uk/data/britrocks/britrocks.cfc?method=viewSamples&sampleId=378355	http://www.largeimages.bgs.ac.uk/iip/britrocks.html?id=110000/111513	http://www.largeimages.bgs.ac.uk/iip/britrocks.html?id=110000/111512
394916							X			0	S29	29	29	29	Geikie,A.	*	'Original entry: Felsite'	1	Road to Dalry, above Largs cemetery._x000D_Glasgow (30)	Glasgow (30)	NS 213 583							N	221300	658300	http://www.bgs.ac.uk/data/britrocks/britrocks.cfc?method=viewSamples&sampleId=394916	http://www.largeimages.bgs.ac.uk/iip/britrocks.html?id=110000/111515	http://www.largeimages.bgs.ac.uk/iip/britrocks.html?id=110000/111514
375061				X						0	S30	30	30	30	Geikie,A.	*	'Original entry: Porphyrite?'	1	Dyke S of Kel Burn, Largs._x000D_SCOTLAND._x000D_Arran (Millport) (21)	Arran (Millport) (21)	NS 210 560	SCOTLAND		Porphyrite?				N	221000	656000	http://www.bgs.ac.uk/data/britrocks/britrocks.cfc?method=viewSamples&sampleId=375061	http://www.largeimages.bgs.ac.uk/iip/britrocks.html?id=110000/111517	http://www.largeimages.bgs.ac.uk/iip/britrocks.html?id=110000/111516
375062				X						0	S31	31	31	31	Geikie,A.	*	'Original entry: Porphyrite?'	1	Dyke S of Kel Burn, Largs._x000D_SCOTLAND._x000D_Arran (Millport) (21)	Arran (Millport) (21)	NS 210 560	SCOTLAND		Porphyrite?				N	221000	656000	http://www.bgs.ac.uk/data/britrocks/britrocks.cfc?method=viewSamples&sampleId=375062	http://www.largeimages.bgs.ac.uk/iip/britrocks.html?id=110000/111519	http://www.largeimages.bgs.ac.uk/iip/britrocks.html?id=110000/111518
378356				X						0	S33	33	33	33	Geikie,A.	*		0	S of Warrenpark Largs._x000D_SCOTLAND._x000D_Rothesay (29)	Rothesay (29)	NS 206 579	SCOTLAND		1st porphyry s of				N	220600	657900	http://www.bgs.ac.uk/data/britrocks/britrocks.cfc?method=viewSamples&sampleId=378356	http://www.largeimages.bgs.ac.uk/iip/britrocks.html?id=110000/111523	http://www.largeimages.bgs.ac.uk/iip/britrocks.html?id=110000/111522
378357				X						0	S34	34	34	34	Geikie,A.	*	'Original entry: Olivine Dolerite'	1	S of Warrenpark Largs._x000D_SCOTLAND._x000D_Rothesay (29)	Rothesay (29)	NS 206 579	SCOTLAND		Olivine dolerite, 1st dolerite				N	220600	657900	http://www.bgs.ac.uk/data/britrocks/britrocks.cfc?method=viewSamples&sampleId=378357	http://www.largeimages.bgs.ac.uk/iip/britrocks.html?id=110000/111525	http://www.largeimages.bgs.ac.uk/iip/britrocks.html?id=110000/111524
377980				X						0	S35	35	35	35	Geikie,A.	*		0	Below Broomcrag Park, Largs._x000D_SCOTLAND._x000D_Rothesay (29)	Rothesay (29)	NS 208 577	SCOTLAND		Porphyry				N	220800	657700	http://www.bgs.ac.uk/data/britrocks/britrocks.cfc?method=viewSamples&sampleId=377980	http://www.largeimages.bgs.ac.uk/iip/britrocks.html?id=110000/111527	http://www.largeimages.bgs.ac.uk/iip/britrocks.html?id=110000/111526
378379				X						0	S36	36	36	36	Geikie,A.	*		0	Shore Routen Burn, Largs._x000D_SCOTLAND._x000D_Rothesay (29)	Rothesay (29)	NS 1926 6179	SCOTLAND		Red porphyry				N	219260	661790	http://www.bgs.ac.uk/data/britrocks/britrocks.cfc?method=viewSamples&sampleId=378379	http://www.largeimages.bgs.ac.uk/iip/britrocks.html?id=110000/111529	http://www.largeimages.bgs.ac.uk/iip/britrocks.html?id=110000/111528
378380				X						0	S37	37	37	37	Geikie,A.	*		0	Shore below Knock Castle._x000D_SCOTLAND._x000D_Rothesay (29)	Rothesay (29)	NS 190 631	SCOTLAND		Porphyry				N	219000	663100	http://www.bgs.ac.uk/data/britrocks/britrocks.cfc?method=viewSamples&sampleId=378380	http://www.largeimages.bgs.ac.uk/iip/britrocks.html?id=110000/111531	http://www.largeimages.bgs.ac.uk/iip/britrocks.html?id=110000/111530
378381				X						0	S38	38	38	38	Geikie,A.	*	'Original entry: Quartz'	1	Near Knock Castle, Largs._x000D_SCOTLAND._x000D_Rothesay (29)	Rothesay (29)	NS 1909 6319	SCOTLAND		Quartz, quartz pebble from dyke on shore				N	219090	663190	http://www.bgs.ac.uk/data/britrocks/britrocks.cfc?method=viewSamples&sampleId=378381	http://www.largeimages.bgs.ac.uk/iip/britrocks.html?id=110000/111533	http://www.largeimages.bgs.ac.uk/iip/britrocks.html?id=110000/111532
378382				X						0	S39	39	39	39	Geikie,A.	*	'Original entry: Olivine Dolerite'	1	Quarry roadside, near Knock Castle, N of Largs._x000D_SCOTLAND._x000D_Rothesay (29)	Rothesay (29)	NS 19 63	SCOTLAND		Olivine dolerite, dolerite dyke				N	219000	663000	http://www.bgs.ac.uk/data/britrocks/britrocks.cfc?method=viewSamples&sampleId=378382	http://www.largeimages.bgs.ac.uk/iip/britrocks.html?id=110000/111535	http://www.largeimages.bgs.ac.uk/iip/britrocks.html?id=110000/111534
377975				X						0	S40	40	40	40	Geikie,A.	*	'Original entry: Ophitic Olivine Dolerite'	1	N of Largs._x000D_SCOTLAND._x000D_Rothesay (29)	Rothesay (29)		SCOTLAND		Ophitic olivine dolerite, 2 dyke (from centre of)				N			http://www.bgs.ac.uk/data/britrocks/britrocks.cfc?method=viewSamples&sampleId=377975	http://www.largeimages.bgs.ac.uk/iip/britrocks.html?id=110000/111537	http://www.largeimages.bgs.ac.uk/iip/britrocks.html?id=110000/111536
378383				X						0	S41	41	41	41	Geikie,A.	*	'Original entry: Tachylite'	1	N of Largs._x000D_SCOTLAND._x000D_Rothesay (29)	Rothesay (29)		SCOTLAND		Tachylite, 2 dyke (from edge of)				N			http://www.bgs.ac.uk/data/britrocks/britrocks.cfc?method=viewSamples&sampleId=378383	http://www.largeimages.bgs.ac.uk/iip/britrocks.html?id=110000/111539	http://www.largeimages.bgs.ac.uk/iip/britrocks.html?id=110000/111538
378384				X						0	S42	42	42	42	Geikie,A.	*	'Original entry: Tachylite'	1	N of Largs._x000D_SCOTLAND._x000D_Rothesay (29)	Rothesay (29)		SCOTLAND		Tachylite, 2 dyke (vein traversing)				N			http://www.bgs.ac.uk/data/britrocks/britrocks.cfc?method=viewSamples&sampleId=378384	http://www.largeimages.bgs.ac.uk/iip/britrocks.html?id=110000/111541	http://www.largeimages.bgs.ac.uk/iip/britrocks.html?id=110000/111540
402423							X			0	S43	43	43	43	Geikie,A.	*		0	Ardrossan shore._x000D_Kilmarnock (22)	Kilmarnock (22)	NS 2 4							N	222000	642000	http://www.bgs.ac.uk/data/britrocks/britrocks.cfc?method=viewSamples&sampleId=402423	http://www.largeimages.bgs.ac.uk/iip/britrocks.html?id=110000/111543	http://www.largeimages.bgs.ac.uk/iip/britrocks.html?id=110000/111542
402424							X			0	S44	44	44	44	Geikie,A.	*	'Original entry: Ferruginous Rock ? Tuff Hht'	1	Ardrossan shore._x000D_Kilmarnock (22)	Kilmarnock (22)	NS 22 42			Ferruginous rock (slide bad) - might be a tuff hht				N	222000	642000	http://www.bgs.ac.uk/data/britrocks/britrocks.cfc?method=viewSamples&sampleId=402424	http://www.largeimages.bgs.ac.uk/iip/britrocks.html?id=110000/111545	http://www.largeimages.bgs.ac.uk/iip/britrocks.html?id=110000/111544
402425							X			0	S45	45	45	45	Geikie,A.	*	'Original entry: Tuff Hht'	1	Ardrossan shore._x000D_Kilmarnock (22)	Kilmarnock (22)	NS 22 42			Tuff with fragments of basalt and pisolitic structure in matrix hht				N	222000	642000	http://www.bgs.ac.uk/data/britrocks/britrocks.cfc?method=viewSamples&sampleId=402425	http://www.largeimages.bgs.ac.uk/iip/britrocks.html?id=110000/111547	http://www.largeimages.bgs.ac.uk/iip/britrocks.html?id=110000/111546
375066				X						0	S46	46	46	46	Geikie,A.	*	'Original entry: Tuff'	1	Ash, shore S of Farlie Bay._x000D_SCOTLAND._x000D_Arran (Millport) (21)	Arran (Millport) (21)	NS 200 540	SCOTLAND		Tuff				N	220000	654000	http://www.bgs.ac.uk/data/britrocks/britrocks.cfc?method=viewSamples&sampleId=375066	http://www.largeimages.bgs.ac.uk/iip/britrocks.html?id=110000/111549	http://www.largeimages.bgs.ac.uk/iip/britrocks.html?id=110000/111548
402426							X			0	S47	47	47	47	Geikie,A.	*		0	Eaglesham._x000D_Kilmarnock (22)	Kilmarnock (22)	NS 57 51			Rock rotten hht				N	257000	651000	http://www.bgs.ac.uk/data/britrocks/britrocks.cfc?method=viewSamples&sampleId=402426	http://www.largeimages.bgs.ac.uk/iip/britrocks.html?id=110000/111551	http://www.largeimages.bgs.ac.uk/iip/britrocks.html?id=110000/111550
376263			X							0	S50	50	50	50	Geikie,A.	*	'Original entry: Sandstone'	1	Nethan Water, Lesmahagow (O.R.S.)._x000D_SCOTLAND._x000D_Hamilton (23)	Hamilton (23)	NS 8 4	SCOTLAND		Sandstone				N	280000	640000	http://www.bgs.ac.uk/data/britrocks/britrocks.cfc?method=viewSamples&sampleId=376263	http://www.largeimages.bgs.ac.uk/iip/britrocks.html?id=110000/111559	http://www.largeimages.bgs.ac.uk/iip/britrocks.html?id=110000/111558
376264			X							0	S51	51	51	51	Geikie,A.	*	'Original entry: Porphyrite'	1	Nethan Water, Lesmahagow (O.R.S.) dyke No. 1._x000D_SCOTLAND._x000D_Hamilton (23)	Hamilton (23)	NS 8 4	SCOTLAND		Porphyrite				N	280000	640000	http://www.bgs.ac.uk/data/britrocks/britrocks.cfc?method=viewSamples&sampleId=376264	http://www.largeimages.bgs.ac.uk/iip/britrocks.html?id=110000/111561	http://www.largeimages.bgs.ac.uk/iip/britrocks.html?id=110000/111560
376265			X							0	S52	52	52	52	Geikie,A.	*	'Original entry: Porphyrite'	1	Nethan Water, Lesmahagow (O.R.S.) dyke No. 2._x000D_SCOTLAND._x000D_Hamilton (23)	Hamilton (23)	NS 8 4	SCOTLAND		Porphyrite				N	280000	640000	http://www.bgs.ac.uk/data/britrocks/britrocks.cfc?method=viewSamples&sampleId=376265	http://www.largeimages.bgs.ac.uk/iip/britrocks.html?id=110000/111563	http://www.largeimages.bgs.ac.uk/iip/britrocks.html?id=110000/111562
376266			X							0	S53	53	53	53	Geikie,A.	*	'Original entry: Porphyrite'	1	Nethan Water, Lesmahagow (O.R.S.) dyke No. 3._x000D_SCOTLAND._x000D_Hamilton (23)	Hamilton (23)	NS 8 4	SCOTLAND		Porphyrite				N	280000	640000	http://www.bgs.ac.uk/data/britrocks/britrocks.cfc?method=viewSamples&sampleId=376266	http://www.largeimages.bgs.ac.uk/iip/britrocks.html?id=110000/111565	http://www.largeimages.bgs.ac.uk/iip/britrocks.html?id=110000/111564
376267			X							0	S54	54	54	54	Geikie,A.	*	'Original entry: Andesite Basalt'	1	Nethan Water, Lesmahagow (O.R.S.) dyke No. 3._x000D_SCOTLAND._x000D_Hamilton (23)	Hamilton (23)	NS 8 4	SCOTLAND		Andesite basalt				N	280000	640000	http://www.bgs.ac.uk/data/britrocks/britrocks.cfc?method=viewSamples&sampleId=376267	http://www.largeimages.bgs.ac.uk/iip/britrocks.html?id=110000/111567	http://www.largeimages.bgs.ac.uk/iip/britrocks.html?id=110000/111566
376268			X							0	S55	55	55	55	Geikie,A.	*	'Original entry: Basic Porphyrite'	1	Nethan Water, Lesmahagow (O.R.S.) dyke No. 4._x000D_SCOTLAND._x000D_Hamilton (23)	Hamilton (23)	NS 8 4	SCOTLAND		Basic porphyrite				N	280000	640000	http://www.bgs.ac.uk/data/britrocks/britrocks.cfc?method=viewSamples&sampleId=376268	http://www.largeimages.bgs.ac.uk/iip/britrocks.html?id=110000/111569	http://www.largeimages.bgs.ac.uk/iip/britrocks.html?id=110000/111568
376269			X							0	S56	56	56	56	Geikie,A.	*	'Original entry: Glassy Pyroxene Andesite With Quartz'	1	Nethan Water, Lesmahagow (O.R.S.) dyke No. 5._x000D_SCOTLAND._x000D_Hamilton (23)	Hamilton (23)	NS 8 4	SCOTLAND		Glassy pyroxene andesite with quartz				N	280000	640000	http://www.bgs.ac.uk/data/britrocks/britrocks.cfc?method=viewSamples&sampleId=376269	http://www.largeimages.bgs.ac.uk/iip/britrocks.html?id=110000/111571	http://www.largeimages.bgs.ac.uk/iip/britrocks.html?id=110000/111570
375889			X							0	S57	57	57	57	Geikie,A.	*	'Original entry: Quartz Porphyrite'	1	Nethan Water, Lesmahagow (O.R.S.) dyke No. 6._x000D_SCOTLAND._x000D_Hamilton (23)	Hamilton (23)	NS 8 4	SCOTLAND		Quartz porphyrite				N	280000	640000	http://www.bgs.ac.uk/data/britrocks/britrocks.cfc?method=viewSamples&sampleId=375889	http://www.largeimages.bgs.ac.uk/iip/britrocks.html?id=110000/111573	http://www.largeimages.bgs.ac.uk/iip/britrocks.html?id=110000/111572
376270			X							0	S58	58	58	58	Geikie,A.	*	'Original entry: Quartz Porphyry'	1	Nethan Water, Lesmahagow (O.R.S.) dyke No. 7._x000D_SCOTLAND._x000D_Hamilton (23)	Hamilton (23)	NS 8 4	SCOTLAND		Quartz porphyry				N	280000	640000	http://www.bgs.ac.uk/data/britrocks/britrocks.cfc?method=viewSamples&sampleId=376270	http://www.largeimages.bgs.ac.uk/iip/britrocks.html?id=110000/111575	http://www.largeimages.bgs.ac.uk/iip/britrocks.html?id=110000/111574
376271			X							0	S59	59	59	59	Geikie,A.	*	'Original entry: Quartz Dolerite'	1	Nethan Water, Lesmahagow (O.R.S.) dyke No. 8._x000D_SCOTLAND._x000D_Hamilton (23)	Hamilton (23)	NS 8 4	SCOTLAND		Quartz dolerite				N	280000	640000	http://www.bgs.ac.uk/data/britrocks/britrocks.cfc?method=viewSamples&sampleId=376271	http://www.largeimages.bgs.ac.uk/iip/britrocks.html?id=110000/111577	http://www.largeimages.bgs.ac.uk/iip/britrocks.html?id=110000/111576
376272			X							0	S60	60	60	60	Geikie,A.	*	'Original entry: Felsite'	1	Nethan Water, Lesmahagow (O.R.S.) dyke No. 9._x000D_SCOTLAND._x000D_Hamilton (23)	Hamilton (23)	NS 8 4	SCOTLAND		Felsite				N	280000	640000	http://www.bgs.ac.uk/data/britrocks/britrocks.cfc?method=viewSamples&sampleId=376272	http://www.largeimages.bgs.ac.uk/iip/britrocks.html?id=110000/111579	http://www.largeimages.bgs.ac.uk/iip/britrocks.html?id=110000/111578
376273			X							0	S61	61	61	61	Geikie,A.	*	'Original entry: Decomposed Igneous Rock'	1	Nethan Water, Lesmahagow (O.R.S.) dyke No. 10._x000D_SCOTLAND._x000D_Hamilton (23)	Hamilton (23)	NS 8 4	SCOTLAND		Decomposed igneous rock				N	280000	640000	http://www.bgs.ac.uk/data/britrocks/britrocks.cfc?method=viewSamples&sampleId=376273	http://www.largeimages.bgs.ac.uk/iip/britrocks.html?id=110000/111581	http://www.largeimages.bgs.ac.uk/iip/britrocks.html?id=110000/111580
376274			X							0	S62	62	62	62	Geikie,A.	*	'Original entry: Felsite'	1	Nethan Water, Lesmahagow (O.R.S.) dyke No. 11._x000D_SCOTLAND._x000D_Hamilton (23)	Hamilton (23)	NS 8 4	SCOTLAND		Felsite				N	280000	640000	http://www.bgs.ac.uk/data/britrocks/britrocks.cfc?method=viewSamples&sampleId=376274	http://www.largeimages.bgs.ac.uk/iip/britrocks.html?id=110000/111583	http://www.largeimages.bgs.ac.uk/iip/britrocks.html?id=110000/111582
376275			X							0	S63	63	63	63	Geikie,A.	*	'Original entry: Felsite'	1	Nethan Water, Lesmahagow (O.R.S.) dyke No. 12._x000D_SCOTLAND._x000D_Hamilton (23)	Hamilton (23)	NS 8 4	SCOTLAND		Felsite				N	280000	640000	http://www.bgs.ac.uk/data/britrocks/britrocks.cfc?method=viewSamples&sampleId=376275	http://www.largeimages.bgs.ac.uk/iip/britrocks.html?id=110000/111585	http://www.largeimages.bgs.ac.uk/iip/britrocks.html?id=110000/111584
										June 1868	S66	66	66	66																	http://www.bgs.ac.uk/data/britrocks/britrocks.cfc?method=viewSamples&sampleId=
										June 1868	S68	68	68	68																	http://www.bgs.ac.uk/data/britrocks/britrocks.cfc?method=viewSamples&sampleId=
										June 1868	S71	71	71	71																	http://www.bgs.ac.uk/data/britrocks/britrocks.cfc?method=viewSamples&sampleId=
376276			X							0	S82	82	82	82	Geikie,A.	*	'Original entry: Felspar-Phyric Andesite (?Olivine)'	1	Parkhall Burn, Douglas (O.R.S.)._x000D_SCOTLAND._x000D_Hamilton (23)	Hamilton (23)	NS 86 29	SCOTLAND		Felspar-phyric andesite (?olivine)				N	286000	629000	http://www.bgs.ac.uk/data/britrocks/britrocks.cfc?method=viewSamples&sampleId=376276	http://www.largeimages.bgs.ac.uk/iip/britrocks.html?id=110000/111615	http://www.largeimages.bgs.ac.uk/iip/britrocks.html?id=110000/111614
376277			X							0	S83	83	83	83	Geikie,A.	*	'Original entry: Vesicular Hyalophitic Andesite'	1	Parkhall Burn, Douglas (O.R.S.)._x000D_SCOTLAND._x000D_Hamilton (23)	Hamilton (23)	NS 86 29	SCOTLAND		Vesicular hyalophitic andesite				N	286000	629000	http://www.bgs.ac.uk/data/britrocks/britrocks.cfc?method=viewSamples&sampleId=376277	http://www.largeimages.bgs.ac.uk/iip/britrocks.html?id=110000/111617	http://www.largeimages.bgs.ac.uk/iip/britrocks.html?id=110000/111616
376278			X							0	S84	84	84	84	Geikie,A.	*	'Original entry: Felspar-Phyric Olivine Basalt'	1	Parkhall Burn, Douglas (O.R.S.)._x000D_SCOTLAND._x000D_Hamilton (23)	Hamilton (23)	NS 86 29	SCOTLAND		Felspar-phyric olivine basalt				N	286000	629000	http://www.bgs.ac.uk/data/britrocks/britrocks.cfc?method=viewSamples&sampleId=376278	http://www.largeimages.bgs.ac.uk/iip/britrocks.html?id=110000/111619	http://www.largeimages.bgs.ac.uk/iip/britrocks.html?id=110000/111618
376279			X							0	S85	85	85	85	Geikie,A.	*	'Original entry: Felsite (Non Porphyritic)'	1	Parkhall Burn, Douglas (O.R.S.)._x000D_SCOTLAND._x000D_Hamilton (23)	Hamilton (23)	NS 86 29	SCOTLAND		Felsite (non porphyritic)				N	286000	629000	http://www.bgs.ac.uk/data/britrocks/britrocks.cfc?method=viewSamples&sampleId=376279	http://www.largeimages.bgs.ac.uk/iip/britrocks.html?id=110000/111621	http://www.largeimages.bgs.ac.uk/iip/britrocks.html?id=110000/111620
375829			X							0	S86	86	86	86	Geikie,A.	*	'Original entry: Tholeiite'	1	NE of Douglas (Dolerite dyke)._x000D_SCOTLAND._x000D_Hamilton (23)	Hamilton (23)	NS 86 29	SCOTLAND		Tholeiite				N	286000	629000	http://www.bgs.ac.uk/data/britrocks/britrocks.cfc?method=viewSamples&sampleId=375829	http://www.largeimages.bgs.ac.uk/iip/britrocks.html?id=110000/111623	http://www.largeimages.bgs.ac.uk/iip/britrocks.html?id=110000/111622
376280			X							0	S87	87	87	87	Geikie,A.	*	'Original entry: Glassy Olivine Basalt (Ybd1)'	1	Parkhall Burn, Douglas (boulder)._x000D_SCOTLAND._x000D_Hamilton (23)	Hamilton (23)		SCOTLAND		Glassy olivine basalt (ybd1)				N			http://www.bgs.ac.uk/data/britrocks/britrocks.cfc?method=viewSamples&sampleId=376280	http://www.largeimages.bgs.ac.uk/iip/britrocks.html?id=110000/111625	http://www.largeimages.bgs.ac.uk/iip/britrocks.html?id=110000/111624
378385				X						0	S92	92	92	92	Geikie,A.	*	'Original entry: Silicious Pebble'	1	Shore, Knock, Largs._x000D_SCOTLAND._x000D_Rothesay (29)	Rothesay (29)	NS 1909 6319	SCOTLAND		Silicious pebble, pebble from dolerite dyke				N	219090	663190	http://www.bgs.ac.uk/data/britrocks/britrocks.cfc?method=viewSamples&sampleId=378385	http://www.largeimages.bgs.ac.uk/iip/britrocks.html?id=110000/111637	http://www.largeimages.bgs.ac.uk/iip/britrocks.html?id=110000/111636
384056						X				0	S102	102	102	102	Geikie,A.	*	'Original entry: Wood'	1	Largo shore._x000D_SCOTLAND._x000D_North Berwick (41)	North Berwick (41)	NO 412 024	SCOTLAND		From ash				N	341200	702400	http://www.bgs.ac.uk/data/britrocks/britrocks.cfc?method=viewSamples&sampleId=384056	http://www.largeimages.bgs.ac.uk/iip/britrocks.html?id=110000/111653	http://www.largeimages.bgs.ac.uk/iip/britrocks.html?id=110000/111652
399541		X								0	S103	103	103	103	Geikie,A.	*	'Original entry: Olivine Dolerite (Ophitic)'	1	Corstorphine Hill._x000D_Edinburgh (32)	Edinburgh (32)	NT 20 74			Dolerite				N	320000	674000	http://www.bgs.ac.uk/data/britrocks/britrocks.cfc?method=viewSamples&sampleId=399541	http://www.largeimages.bgs.ac.uk/iip/britrocks.html?id=110000/111655	http://www.largeimages.bgs.ac.uk/iip/britrocks.html?id=110000/111654
399542		X								0	S104	104	104	104	Geikie,A.	*	'Original entry: Analcime Olivine Dolerite'	1	Salisbury Crags._x000D_Edinburgh (32)	Edinburgh (32)	NT 26 73			Teschenite f				N	326000	673000	http://www.bgs.ac.uk/data/britrocks/britrocks.cfc?method=viewSamples&sampleId=399542	http://www.largeimages.bgs.ac.uk/iip/britrocks.html?id=110000/111657	http://www.largeimages.bgs.ac.uk/iip/britrocks.html?id=110000/111656
399543		X								0	S105	105	105	105	Geikie,A.	*	'Original entry: Teschenite'	1	Heriot Mount, Arthur's Seat._x000D_Edinburgh (32)	Edinburgh (32)	NT 2646 7308			"porphyrite"				N	326460	673080	http://www.bgs.ac.uk/data/britrocks/britrocks.cfc?method=viewSamples&sampleId=399543	http://www.largeimages.bgs.ac.uk/iip/britrocks.html?id=110000/111659	http://www.largeimages.bgs.ac.uk/iip/britrocks.html?id=110000/111658
399544		X								0	S106	106	106	106	Geikie,A.	*	'Original entry: Andesite'	1	Blackford Hill._x000D_Edinburgh (32)	Edinburgh (32)	NT 25 70			"porphyrite"				N	325000	670000	http://www.bgs.ac.uk/data/britrocks/britrocks.cfc?method=viewSamples&sampleId=399544	http://www.largeimages.bgs.ac.uk/iip/britrocks.html?id=110000/111661	http://www.largeimages.bgs.ac.uk/iip/britrocks.html?id=110000/111660
399629		X								0	S107	107	107	107	Geikie,A.	*	'Original entry: Andesite'	1	West quarry on Braid Hill Road, Braid Hills._x000D_Edinburgh (32)	Edinburgh (32)	NT 2468 6996							N	324680	669960	http://www.bgs.ac.uk/data/britrocks/britrocks.cfc?method=viewSamples&sampleId=399629	http://www.largeimages.bgs.ac.uk/iip/britrocks.html?id=110000/111663	http://www.largeimages.bgs.ac.uk/iip/britrocks.html?id=110000/111662
360446				X						0	S108	108	108	108	Geikie,A.	*	'Original entry: Pitchstone Porphyry'	1	Beannan Breaca, Sgurr of Eigg._x000D_SCOTLAND._x000D_Rum (60)	Rum (60)	NM 447 865	SCOTLAND						N	144700	786500	http://www.bgs.ac.uk/data/britrocks/britrocks.cfc?method=viewSamples&sampleId=360446	http://www.largeimages.bgs.ac.uk/iip/britrocks.html?id=110000/111665	http://www.largeimages.bgs.ac.uk/iip/britrocks.html?id=110000/111664
360623				X						0	S109	109	109	109	Geikie,A.	*	'Original entry: Pitchstone Porphyry'	1	Beannan Breaca, Sgurr of Eigg._x000D_SCOTLAND._x000D_Rum (60)	Rum (60)	NM 447 865	SCOTLAND						N	144700	786500	http://www.bgs.ac.uk/data/britrocks/britrocks.cfc?method=viewSamples&sampleId=360623	http://www.largeimages.bgs.ac.uk/iip/britrocks.html?id=110000/111667	http://www.largeimages.bgs.ac.uk/iip/britrocks.html?id=110000/111666
375151				X						0	S110	110	110	110	Geikie,A.	*	'Original entry: Pitchstone'	1	Corrygills shore._x000D_SCOTLAND._x000D_Arran (Millport) (21)	Arran (Millport) (21)	NS 040 340	SCOTLAND		Pitchstone				N	204000	634000	http://www.bgs.ac.uk/data/britrocks/britrocks.cfc?method=viewSamples&sampleId=375151	http://www.largeimages.bgs.ac.uk/iip/britrocks.html?id=110000/111669	http://www.largeimages.bgs.ac.uk/iip/britrocks.html?id=110000/111668
375152				X						0	S111	111	111	111	Geikie,A.	*	'Original entry: Pitchstone'	1	Corrygills shore._x000D_SCOTLAND._x000D_Arran (Millport) (21)	Arran (Millport) (21)	NS 040 340	SCOTLAND		Pitchstone				N	204000	634000	http://www.bgs.ac.uk/data/britrocks/britrocks.cfc?method=viewSamples&sampleId=375152	http://www.largeimages.bgs.ac.uk/iip/britrocks.html?id=110000/111671	http://www.largeimages.bgs.ac.uk/iip/britrocks.html?id=110000/111670
375551				X						0	S112; S112/A; S112/B;	112	112	112	Geikie,A.	*	'Original entry: Pitchstone'	1	Moneadh Mhor Glen._x000D_SCOTLAND._x000D_Arran (Millport) (21)	Arran (Millport) (21)		SCOTLAND		Pitchstone				N			http://www.bgs.ac.uk/data/britrocks/britrocks.cfc?method=viewSamples&sampleId=375551	http://www.largeimages.bgs.ac.uk/iip/britrocks.html?id=110000/111673	http://www.largeimages.bgs.ac.uk/iip/britrocks.html?id=110000/111672,	http://www.largeimages.bgs.ac.uk/iip/britrocks.html?id=110000/111675	http://www.largeimages.bgs.ac.uk/iip/britrocks.html?id=110000/111674
399630										0	S114	114	114	114	Geikie,A.	*	'Original entry: Olivine Dolerite'	1	Tramway, W of Mingle Pit, Bo'ness._x000D_Airdrie (31)	Airdrie (31)	NT 003 806			Above western main coal				N	300300	680600	http://www.bgs.ac.uk/data/britrocks/britrocks.cfc?method=viewSamples&sampleId=399630	http://www.largeimages.bgs.ac.uk/iip/britrocks.html?id=110000/111679	http://www.largeimages.bgs.ac.uk/iip/britrocks.html?id=110000/111678
399631		X								0	S115	115	115	115	Geikie,A.	*	'Original entry: Porphyritic Dolerite'	1	Mid Tartraven._x000D_Edinburgh (32)	Edinburgh (32)	NT 004 725			Dalmeny type h & f				N	300400	672500	http://www.bgs.ac.uk/data/britrocks/britrocks.cfc?method=viewSamples&sampleId=399631	http://www.largeimages.bgs.ac.uk/iip/britrocks.html?id=110000/111681	http://www.largeimages.bgs.ac.uk/iip/britrocks.html?id=110000/111680
399632										0	S116	116	116	116	Geikie,A.	*	'Original entry: Basalt'	1	Above limestone of Wardlaw Quarry._x000D_Airdrie (31)	Airdrie (31)	NS 995 731							N	299500	673100	http://www.bgs.ac.uk/data/britrocks/britrocks.cfc?method=viewSamples&sampleId=399632	http://www.largeimages.bgs.ac.uk/iip/britrocks.html?id=110000/111683	http://www.largeimages.bgs.ac.uk/iip/britrocks.html?id=110000/111682
399633		X								0	S117	117	117	117	Geikie,A.	*	'Original entry: Diabase'	1	West Broadlaw, 3.5 miles SE of Linlithgow._x000D_Edinburgh (32)	Edinburgh (32)	NT 0403 7303			Insertal series dolerite				N	304030	673030	http://www.bgs.ac.uk/data/britrocks/britrocks.cfc?method=viewSamples&sampleId=399633	http://www.largeimages.bgs.ac.uk/iip/britrocks.html?id=110000/111685	http://www.largeimages.bgs.ac.uk/iip/britrocks.html?id=110000/111684
399634		X								0	S118	118	118	118	Geikie,A.	*	'Original entry: Quartz-Dolerite'	1	N of Balgreen, 4 miles SE of Linlithgow._x000D_Edinburgh (32)	Edinburgh (32)	NT 0348 7222			Insertal series dolerite				N	303480	672220	http://www.bgs.ac.uk/data/britrocks/britrocks.cfc?method=viewSamples&sampleId=399634	http://www.largeimages.bgs.ac.uk/iip/britrocks.html?id=110000/111687	http://www.largeimages.bgs.ac.uk/iip/britrocks.html?id=110000/111686
399635		X								0	S119	119	119	119	Geikie,A.	*	'Original entry: Basalt'	1	Binny Craig, 1.25 miles W of Uphall._x000D_Edinburgh (32)	Edinburgh (32)	NT 043 735			Insertal series dolerite				N	304300	673500	http://www.bgs.ac.uk/data/britrocks/britrocks.cfc?method=viewSamples&sampleId=399635	http://www.largeimages.bgs.ac.uk/iip/britrocks.html?id=110000/111689	http://www.largeimages.bgs.ac.uk/iip/britrocks.html?id=110000/111688
399636		X								0	S120	120	120	120	Geikie,A.	*	'Original entry: Olivine Dolerite'	1	Dalmahoy Hill, 2.5 miles S of Ratho._x000D_Edinburgh (32)	Edinburgh (32)	NT 13 67			Insertal series dolerite				N	313000	667000	http://www.bgs.ac.uk/data/britrocks/britrocks.cfc?method=viewSamples&sampleId=399636	http://www.largeimages.bgs.ac.uk/iip/britrocks.html?id=110000/111691	http://www.largeimages.bgs.ac.uk/iip/britrocks.html?id=110000/111690
399637		X								0	S121	121	121	121	Geikie,A.	*	'Original entry: Quartz-Dolerite'	1	Nancy's Hill._x000D_Edinburgh (32)	Edinburgh (32)	NT 0225 7600			Dyke				N	302250	676000	http://www.bgs.ac.uk/data/britrocks/britrocks.cfc?method=viewSamples&sampleId=399637	http://www.largeimages.bgs.ac.uk/iip/britrocks.html?id=110000/111693	http://www.largeimages.bgs.ac.uk/iip/britrocks.html?id=110000/111692
373980				X						0	S123	123	123	123	Geikie,A.	*	'Original entry: Dolerite'	1	Ardtun, Mull._x000D_SCOTLAND._x000D_Iona (43)	Iona (43)	NM 376 248	SCOTLAND		Bed overlying leaf bed				N	137600	724800	http://www.bgs.ac.uk/data/britrocks/britrocks.cfc?method=viewSamples&sampleId=373980	http://www.largeimages.bgs.ac.uk/iip/britrocks.html?id=110000/111697	http://www.largeimages.bgs.ac.uk/iip/britrocks.html?id=110000/111696
360672				X						0	S124	124	124	124	Geikie,A.	*	'Original entry: Dolerite'	1	Above Lower Gruline, Eigg._x000D_SCOTLAND._x000D_Rum (60)	Rum (60)	NM 457 843	SCOTLAND						N	145700	784300	http://www.bgs.ac.uk/data/britrocks/britrocks.cfc?method=viewSamples&sampleId=360672	http://www.largeimages.bgs.ac.uk/iip/britrocks.html?id=110000/111699	http://www.largeimages.bgs.ac.uk/iip/britrocks.html?id=110000/111698
360673				X						0	S125	125	125	125	Geikie,A.	*	'Original entry: Olivine-Dolerite'	1	Harbour, Eigg._x000D_SCOTLAND._x000D_Rum (60)	Rum (60)	NM 481 841	SCOTLAND						N	148100	784100	http://www.bgs.ac.uk/data/britrocks/britrocks.cfc?method=viewSamples&sampleId=360673	http://www.largeimages.bgs.ac.uk/iip/britrocks.html?id=110000/111701	http://www.largeimages.bgs.ac.uk/iip/britrocks.html?id=110000/111700
360674				X						0	S126	126	126	126	Geikie,A.	*	'Original entry: Olivine-Dolerite'	1	Below the cottage, Eigg._x000D_SCOTLAND._x000D_Rum (60)	Rum (60)	NM 481 841	SCOTLAND						N	148100	784100	http://www.bgs.ac.uk/data/britrocks/britrocks.cfc?method=viewSamples&sampleId=360674	http://www.largeimages.bgs.ac.uk/iip/britrocks.html?id=110000/111703	http://www.largeimages.bgs.ac.uk/iip/britrocks.html?id=110000/111702
360675				X						0	S127	127	127	127	Geikie,A.	*	'Original entry: Olivine-Dolerite'	1	Above the harbour, Eigg._x000D_SCOTLAND._x000D_Rum (60)	Rum (60)	NM 482 842	SCOTLAND						N	148200	784200	http://www.bgs.ac.uk/data/britrocks/britrocks.cfc?method=viewSamples&sampleId=360675	http://www.largeimages.bgs.ac.uk/iip/britrocks.html?id=110000/111705	http://www.largeimages.bgs.ac.uk/iip/britrocks.html?id=110000/111704
378095				X						0	S128	128	128	128	Geikie,A.	*	'Original entry: Basalt And Grit'	1	Shore N of Inverkip._x000D_SCOTLAND._x000D_Rothesay (29)	Rothesay (29)	NS 1900 7200	SCOTLAND		Basalt and grit, junction of dolerite and sandstone				N	219000	672000	http://www.bgs.ac.uk/data/britrocks/britrocks.cfc?method=viewSamples&sampleId=378095	http://www.largeimages.bgs.ac.uk/iip/britrocks.html?id=110000/111707	http://www.largeimages.bgs.ac.uk/iip/britrocks.html?id=110000/111706
378121				X						0	S129	129	129	129	Geikie,A.	*	'Original entry: Basalt'	1	Wemyss Bay._x000D_SCOTLAND._x000D_Rothesay (29)	Rothesay (29)	NS 1900 6800	SCOTLAND		Basalt, vitreous edge of dolerite dyke				N	219000	668000	http://www.bgs.ac.uk/data/britrocks/britrocks.cfc?method=viewSamples&sampleId=378121	http://www.largeimages.bgs.ac.uk/iip/britrocks.html?id=110000/111709	http://www.largeimages.bgs.ac.uk/iip/britrocks.html?id=110000/111708
378386				X						0	S130	130	130	130	Geikie,A.	*	'Original entry: Tuff'	1	Knock Hills, Largs._x000D_SCOTLAND._x000D_Rothesay (29)	Rothesay (29)	NS 20 62	SCOTLAND		Tuff				N	220000	662000	http://www.bgs.ac.uk/data/britrocks/britrocks.cfc?method=viewSamples&sampleId=378386	http://www.largeimages.bgs.ac.uk/iip/britrocks.html?id=110000/111711	http://www.largeimages.bgs.ac.uk/iip/britrocks.html?id=110000/111710
378310				X						0	S131	131	131	131	Geikie,A.	*	'Original entry: Tuff(?)'	1	Knock Hills, Largs._x000D_SCOTLAND._x000D_Rothesay (29)	Rothesay (29)	NS 20 62	SCOTLAND		Tuff(?), sandstone fragment				N	220000	662000	http://www.bgs.ac.uk/data/britrocks/britrocks.cfc?method=viewSamples&sampleId=378310	http://www.largeimages.bgs.ac.uk/iip/britrocks.html?id=110000/111713	http://www.largeimages.bgs.ac.uk/iip/britrocks.html?id=110000/111712
378311				X						0	S132	132	132	132	Geikie,A.	*	'Original entry: Porphyritic Basalt'	1	Knock Hills, Largs._x000D_SCOTLAND._x000D_Rothesay (29)	Rothesay (29)	NS 20 62	SCOTLAND		Porphyritic basalt, melaphyre (crystalline)				N	220000	662000	http://www.bgs.ac.uk/data/britrocks/britrocks.cfc?method=viewSamples&sampleId=378311	http://www.largeimages.bgs.ac.uk/iip/britrocks.html?id=110000/111715	http://www.largeimages.bgs.ac.uk/iip/britrocks.html?id=110000/111714
378312				X						0	S133	133	133	133	Geikie,A.	*	'Original entry: Olivine Basalt'	1	Knock Hills, Largs._x000D_SCOTLAND._x000D_Rothesay (29)	Rothesay (29)	NS 20 62	SCOTLAND		Olivine basalt, melaphyre (compact)				N	220000	662000	http://www.bgs.ac.uk/data/britrocks/britrocks.cfc?method=viewSamples&sampleId=378312	http://www.largeimages.bgs.ac.uk/iip/britrocks.html?id=110000/111717	http://www.largeimages.bgs.ac.uk/iip/britrocks.html?id=110000/111716
378313				X						0	S134	134	134	134	Geikie,A.	*	'Original entry: Altered Basalt'	1	Knock Hills, Largs._x000D_SCOTLAND._x000D_Rothesay (29)	Rothesay (29)	NS 20 62	SCOTLAND		Altered basalt, melaphyre				N	220000	662000	http://www.bgs.ac.uk/data/britrocks/britrocks.cfc?method=viewSamples&sampleId=378313	http://www.largeimages.bgs.ac.uk/iip/britrocks.html?id=110000/111719	http://www.largeimages.bgs.ac.uk/iip/britrocks.html?id=110000/111718
378314				X						0	S135	135	135	135	Geikie,A.	*	'Original entry: Basalt'	1	Knock Hills, Largs._x000D_SCOTLAND._x000D_Rothesay (29)	Rothesay (29)	NS 20 62	SCOTLAND		Basalt, melaphyre fragment tuff				N	220000	662000	http://www.bgs.ac.uk/data/britrocks/britrocks.cfc?method=viewSamples&sampleId=378314	http://www.largeimages.bgs.ac.uk/iip/britrocks.html?id=110000/111721	http://www.largeimages.bgs.ac.uk/iip/britrocks.html?id=110000/111720
402427							X			0	S137	137	137	137	Geikie,A.	*		0	Eaglesham._x000D_Kilmarnock (22)	Kilmarnock (22)	NS 57 51			Too bad for determination hht				N	257000	651000	http://www.bgs.ac.uk/data/britrocks/britrocks.cfc?method=viewSamples&sampleId=402427	http://www.largeimages.bgs.ac.uk/iip/britrocks.html?id=110000/111723	http://www.largeimages.bgs.ac.uk/iip/britrocks.html?id=110000/111722
402428							X			0	S144	144	144	144	Geikie,A.	*		0	Plumdass, Garnock Water, NW of Ayr._x000D_Glasgow (30)	Glasgow (30)	NS 29 59			Indeterminable hht				N	229000	659000	http://www.bgs.ac.uk/data/britrocks/britrocks.cfc?method=viewSamples&sampleId=402428	http://www.largeimages.bgs.ac.uk/iip/britrocks.html?id=110000/111737	http://www.largeimages.bgs.ac.uk/iip/britrocks.html?id=110000/111736
360676				X						0	S149	149	149	149	Geikie,A.	*	'Original entry: Pitchstone'	1	Sgurr of Eigg._x000D_SCOTLAND._x000D_Rum (60)	Rum (60)	NM 463 837	SCOTLAND						N	146300	783700	http://www.bgs.ac.uk/data/britrocks/britrocks.cfc?method=viewSamples&sampleId=360676	http://www.largeimages.bgs.ac.uk/iip/britrocks.html?id=110000/111739	http://www.largeimages.bgs.ac.uk/iip/britrocks.html?id=110000/111738
360363				X						0	S150	150	150	150	Geikie,A.	*	'Original entry: Pitchstone'	1	Beannan Breaca, Eigg._x000D_SCOTLAND._x000D_Rum (60)	Rum (60)	NM 447 865	SCOTLAND		Dyke				N	144700	786500	http://www.bgs.ac.uk/data/britrocks/britrocks.cfc?method=viewSamples&sampleId=360363	http://www.largeimages.bgs.ac.uk/iip/britrocks.html?id=110000/111741	http://www.largeimages.bgs.ac.uk/iip/britrocks.html?id=110000/111740
360364				X						0	S151	151	151	151	Geikie,A.	*	'Original entry: Pitchstone'	1	Dyke at Laig road, Eigg._x000D_SCOTLAND._x000D_Rum (60)	Rum (60)	NM 475 877	SCOTLAND		W dyke				N	147500	787700	http://www.bgs.ac.uk/data/britrocks/britrocks.cfc?method=viewSamples&sampleId=360364	http://www.largeimages.bgs.ac.uk/iip/britrocks.html?id=110000/111743	http://www.largeimages.bgs.ac.uk/iip/britrocks.html?id=110000/111742
360365				X						0	S152	152	152	152	Geikie,A.	*	'Original entry: Pitchstone'	1	W dyke, Rudha Tangart, Eigg._x000D_SCOTLAND._x000D_Rum (60)	Rum (60)	NM 475 832	SCOTLAND		E dyke				N	147500	783200	http://www.bgs.ac.uk/data/britrocks/britrocks.cfc?method=viewSamples&sampleId=360365	http://www.largeimages.bgs.ac.uk/iip/britrocks.html?id=110000/111745	http://www.largeimages.bgs.ac.uk/iip/britrocks.html?id=110000/111744
360366				X						0	S153	153	153	153	Geikie,A.	*	'Original entry: Pitchstone'	1	E dyke, Rudha Tangart, Eigg._x000D_SCOTLAND._x000D_Rum (60)	Rum (60)	NM 476 832	SCOTLAND						N	147600	783200	http://www.bgs.ac.uk/data/britrocks/britrocks.cfc?method=viewSamples&sampleId=360366	http://www.largeimages.bgs.ac.uk/iip/britrocks.html?id=110000/111747	http://www.largeimages.bgs.ac.uk/iip/britrocks.html?id=110000/111746
360367				X						0	S154	154	154	154	Geikie,A.	*		0	Harbour dyke, Eigg._x000D_SCOTLAND._x000D_Rum (60)	Rum (60)	NM 482 842	SCOTLAND						N	148200	784200	http://www.bgs.ac.uk/data/britrocks/britrocks.cfc?method=viewSamples&sampleId=360367	http://www.largeimages.bgs.ac.uk/iip/britrocks.html?id=110000/111749	http://www.largeimages.bgs.ac.uk/iip/britrocks.html?id=110000/111748
360368				X						0	S155	155	155	155	Geikie,A.	*		0	Harbour dyke, Eigg._x000D_SCOTLAND._x000D_Rum (60)	Rum (60)	NM 482 842	SCOTLAND						N	148200	784200	http://www.bgs.ac.uk/data/britrocks/britrocks.cfc?method=viewSamples&sampleId=360368	http://www.largeimages.bgs.ac.uk/iip/britrocks.html?id=110000/111751	http://www.largeimages.bgs.ac.uk/iip/britrocks.html?id=110000/111750
360369				X						0	S156	156	156	156	Geikie,A.	*	'Original entry: Grey Trap'	1	Eigg._x000D_SCOTLAND._x000D_Rum (60)	Rum (60)	NM 4 8	SCOTLAND						N	140000	780000	http://www.bgs.ac.uk/data/britrocks/britrocks.cfc?method=viewSamples&sampleId=360369	http://www.largeimages.bgs.ac.uk/iip/britrocks.html?id=110000/111753	http://www.largeimages.bgs.ac.uk/iip/britrocks.html?id=110000/111752
360370				X						0	S157	157	157	157	Geikie,A.	*	'Original entry: Grey Trap'	1	Eigg._x000D_SCOTLAND._x000D_Rum (60)	Rum (60)	NM 4 8	SCOTLAND						N	140000	780000	http://www.bgs.ac.uk/data/britrocks/britrocks.cfc?method=viewSamples&sampleId=360370	http://www.largeimages.bgs.ac.uk/iip/britrocks.html?id=110000/111755	http://www.largeimages.bgs.ac.uk/iip/britrocks.html?id=110000/111754
360371				X						0	S158	158	158	158	Geikie,A.	*	'Original entry: Felstone'	1	N end of Eigg._x000D_SCOTLAND._x000D_Rum (60)	Rum (60)	NM 48 91	SCOTLAND						N	148000	791000	http://www.bgs.ac.uk/data/britrocks/britrocks.cfc?method=viewSamples&sampleId=360371	http://www.largeimages.bgs.ac.uk/iip/britrocks.html?id=110000/111757	http://www.largeimages.bgs.ac.uk/iip/britrocks.html?id=110000/111756
360372				X						0	S159	159	159	159	Geikie,A.	*	'Original entry: Trachyte'	1	Eigg._x000D_SCOTLAND._x000D_Rum (60)	Rum (60)	NM 4 8	SCOTLAND						N	140000	780000	http://www.bgs.ac.uk/data/britrocks/britrocks.cfc?method=viewSamples&sampleId=360372	http://www.largeimages.bgs.ac.uk/iip/britrocks.html?id=110000/111759	http://www.largeimages.bgs.ac.uk/iip/britrocks.html?id=110000/111758
399638		X								0	S160	160	160	160	Geikie,A.	*	'Original entry: Olivine Basalt'	1	Below St Anthony's Chapel, Arthur's Seat._x000D_Edinburgh (32)	Edinburgh (32)	NT 2756 7373			Craiglockhart type f				N	327560	673730	http://www.bgs.ac.uk/data/britrocks/britrocks.cfc?method=viewSamples&sampleId=399638	http://www.largeimages.bgs.ac.uk/iip/britrocks.html?id=110000/111761	http://www.largeimages.bgs.ac.uk/iip/britrocks.html?id=110000/111760
399639		X								0	S161	161	161	161	Geikie,A.	*	'Original entry: Olivine Basalt'	1	Wester Craiglockhart Hill, 2.5 miles SW of Edinburgh._x000D_Edinburgh (32)	Edinburgh (32)	NT 22 70			Craiglockhart type f				N	322000	670000	http://www.bgs.ac.uk/data/britrocks/britrocks.cfc?method=viewSamples&sampleId=399639	http://www.largeimages.bgs.ac.uk/iip/britrocks.html?id=110000/111763	http://www.largeimages.bgs.ac.uk/iip/britrocks.html?id=110000/111762
399640		X								0	S162	162	162	162	Geikie,A.	*	'Original entry: Olivine Basalt'	1	E side of Dry Dam, Arthur's Seat._x000D_Edinburgh (32)	Edinburgh (32)	NT 277 735			Craiglockhart type f				N	327700	673500	http://www.bgs.ac.uk/data/britrocks/britrocks.cfc?method=viewSamples&sampleId=399640	http://www.largeimages.bgs.ac.uk/iip/britrocks.html?id=110000/111765	http://www.largeimages.bgs.ac.uk/iip/britrocks.html?id=110000/111764
399641		X								0	S163	163	163	163	Geikie,A.	*	'Original entry: Olivine Basalt'	1	Top of Arthur's Seat._x000D_Edinburgh (32)	Edinburgh (32)	NT 2753 7294			Dalmeny type f				N	327530	672940	http://www.bgs.ac.uk/data/britrocks/britrocks.cfc?method=viewSamples&sampleId=399641	http://www.largeimages.bgs.ac.uk/iip/britrocks.html?id=110000/111767	http://www.largeimages.bgs.ac.uk/iip/britrocks.html?id=110000/111766
399642		X								0	S164	164	164	164	Geikie,A.	*	'Original entry: Olivine Basalt'	1	E of Nelson's Monument._x000D_Edinburgh (32)	Edinburgh (32)	NT 2630 7409							N	326300	674090	http://www.bgs.ac.uk/data/britrocks/britrocks.cfc?method=viewSamples&sampleId=399642	http://www.largeimages.bgs.ac.uk/iip/britrocks.html?id=110000/111769	http://www.largeimages.bgs.ac.uk/iip/britrocks.html?id=110000/111768
384057						X				0	S217	217	217	217	Geikie,A.	*	'Original entry: Olivine-Basalt'	1	Shore, North Berwick._x000D_SCOTLAND._x000D_North Berwick (41)	North Berwick (41)	NT 55 85	SCOTLAND		Markle type				N	355000	685000	http://www.bgs.ac.uk/data/britrocks/britrocks.cfc?method=viewSamples&sampleId=384057	http://www.largeimages.bgs.ac.uk/iip/britrocks.html?id=110000/111887	http://www.largeimages.bgs.ac.uk/iip/britrocks.html?id=110000/111886
399643		X								0	S218	218	218	218	Geikie,A.	*	'Original entry: Felsite Or Rhyolite?'	1	Top of Caerketton Hill, Pentlands._x000D_Edinburgh (32)	Edinburgh (32)	NT 237 662			Much silicified f "tuff"				N	323700	666200	http://www.bgs.ac.uk/data/britrocks/britrocks.cfc?method=viewSamples&sampleId=399643	http://www.largeimages.bgs.ac.uk/iip/britrocks.html?id=110000/111889	http://www.largeimages.bgs.ac.uk/iip/britrocks.html?id=110000/111888
399644		X								0	S219	219	219	219	Geikie,A.	*	'Original entry: Olivine Basalt (Much Decomposed)'	1	Head of St Mary's Street, Cannongate._x000D_Edinburgh (32)	Edinburgh (32)	NT 2614 7370			Dyke exposed in 'drain'				N	326140	673700	http://www.bgs.ac.uk/data/britrocks/britrocks.cfc?method=viewSamples&sampleId=399644	http://www.largeimages.bgs.ac.uk/iip/britrocks.html?id=110000/111891	http://www.largeimages.bgs.ac.uk/iip/britrocks.html?id=110000/111890
399645		X								0	S220	220	220	220	Geikie,A.	*	'Original entry: Olivine Basalt (Much Decomposed)'	1	Head of St Mary's Street, Cannongate._x000D_Edinburgh (32)	Edinburgh (32)	NT 2614 7370			Lion' haunch or dunsapie type f				N	326140	673700	http://www.bgs.ac.uk/data/britrocks/britrocks.cfc?method=viewSamples&sampleId=399645	http://www.largeimages.bgs.ac.uk/iip/britrocks.html?id=110000/111893	http://www.largeimages.bgs.ac.uk/iip/britrocks.html?id=110000/111892
399646		X								0	S220a	220	220	220	Geikie,A.	*	'Original entry: Olivine Basalt (Much Decomposed)'	1	Head of St Mary's Street, Cannongate._x000D_Edinburgh (32)	Edinburgh (32)	NT 2614 7370			Lion' haunch or dunsapie type f				N	326140	673700	http://www.bgs.ac.uk/data/britrocks/britrocks.cfc?method=viewSamples&sampleId=399646
394917							X			0	S223	223	223	223	Geikie,A.	*	'Original entry: Basalt'	1	Benbowie Hill, 2.75 mile ENE of Helensburgh._x000D_Glasgow (30)	Glasgow (30)	NS 34 83			Lower carboniferous				N	234000	683000	http://www.bgs.ac.uk/data/britrocks/britrocks.cfc?method=viewSamples&sampleId=394917	http://www.largeimages.bgs.ac.uk/iip/britrocks.html?id=110000/111899	http://www.largeimages.bgs.ac.uk/iip/britrocks.html?id=110000/111898
399647		X								0	S233	233	233	233	Geikie,A.	*	'Original entry: Analcime Olivine Dolerite'	1	Roadside at Crossall Hill, 1 mile E of South Queensferry._x000D_Edinburgh (32)	Edinburgh (32)	NT 1488 7793			Teschenite f dolerite (ophitic) t				N	314880	677930	http://www.bgs.ac.uk/data/britrocks/britrocks.cfc?method=viewSamples&sampleId=399647	http://www.largeimages.bgs.ac.uk/iip/britrocks.html?id=110000/111919	http://www.largeimages.bgs.ac.uk/iip/britrocks.html?id=110000/111918
399648		X								0	S234	234	234	234	Geikie,A.	*	'Original entry: Quartz-Hypersthene-Dolerite (Ratho Type)'	1	Norton Quarry, Ratho. 8 miles W of Edinburgh._x000D_Edinburgh (32)	Edinburgh (32)	NT 134 716			Ratho type f				N	313400	671600	http://www.bgs.ac.uk/data/britrocks/britrocks.cfc?method=viewSamples&sampleId=399648	http://www.largeimages.bgs.ac.uk/iip/britrocks.html?id=110000/111921	http://www.largeimages.bgs.ac.uk/iip/britrocks.html?id=110000/111920
399649		X								0	S235	235	235	235	Geikie,A.	*	'Original entry: Quartz-Dolerite (Ratho Type)'	1	Ratho Quarry, Ratho. 8 miles W of Edinburgh._x000D_Edinburgh (32)	Edinburgh (32)	NT 128 709			Ratho type f				N	312800	670900	http://www.bgs.ac.uk/data/britrocks/britrocks.cfc?method=viewSamples&sampleId=399649	http://www.largeimages.bgs.ac.uk/iip/britrocks.html?id=110000/111923	http://www.largeimages.bgs.ac.uk/iip/britrocks.html?id=110000/111922
399650		X								0	S236	236	236	236	Geikie,A.	*	'Original entry: Analcime Olivine Dolerite'	1	Mons Hill, 1 mile E of South Queensferry._x000D_Edinburgh (32)	Edinburgh (32)	NT 155 785			Teschenite f sub-ophitic)				N	315500	678500	http://www.bgs.ac.uk/data/britrocks/britrocks.cfc?method=viewSamples&sampleId=399650	http://www.largeimages.bgs.ac.uk/iip/britrocks.html?id=110000/111925	http://www.largeimages.bgs.ac.uk/iip/britrocks.html?id=110000/111924
399651		X								0	S238	238	238	238	Geikie,A.	*	'Original entry: Quartz-Hypersthene-Dolerite'	1	St Margaret's Hope._x000D_Edinburgh (32)	Edinburgh (32)	NT 108 821			Dolerite (ophitic) t				N	310800	682100	http://www.bgs.ac.uk/data/britrocks/britrocks.cfc?method=viewSamples&sampleId=399651	http://www.largeimages.bgs.ac.uk/iip/britrocks.html?id=110000/111929	http://www.largeimages.bgs.ac.uk/iip/britrocks.html?id=110000/111928
399652		X								0	S239	239	239	239	Geikie,A.	*	'Original entry: Quartz-Dolerite F; Basalt T'	1	Hallcraigs, Kirknewton, 10 miles SW of Edinburgh._x000D_Edinburgh (32)	Edinburgh (32)	NT 105 667			Basalt t				N	310500	666700	http://www.bgs.ac.uk/data/britrocks/britrocks.cfc?method=viewSamples&sampleId=399652	http://www.largeimages.bgs.ac.uk/iip/britrocks.html?id=110000/111931	http://www.largeimages.bgs.ac.uk/iip/britrocks.html?id=110000/111930
399653		X								0	S240	240	240	240	Geikie,A.	*	'Original entry: Olivine Dolerite F; Basalt T'	1	Dalmahoy Hill, 8 miles S of Edinburgh._x000D_Edinburgh (32)	Edinburgh (32)	NT 13 67			Basalt t				N	313000	667000	http://www.bgs.ac.uk/data/britrocks/britrocks.cfc?method=viewSamples&sampleId=399653	http://www.largeimages.bgs.ac.uk/iip/britrocks.html?id=110000/111933	http://www.largeimages.bgs.ac.uk/iip/britrocks.html?id=110000/111932
382924						X				0	S242	242	242	242	Geikie,A.	*	'Original entry: Olivine-Dolerite'	1	Redcraigs, Roscobie._x000D_SCOTLAND._x000D_Kinross (40)	Kinross (40)	NT 076 925	SCOTLAND		Altered				N	307600	692500	http://www.bgs.ac.uk/data/britrocks/britrocks.cfc?method=viewSamples&sampleId=382924	http://www.largeimages.bgs.ac.uk/iip/britrocks.html?id=110000/112861	http://www.largeimages.bgs.ac.uk/iip/britrocks.html?id=110000/112860
399654		X								0	S246	246	246	246	Geikie,A.	*	'Original entry: Dolerite'	1	Picked up in Hailes Quarry._x000D_Edinburgh (32)	Edinburgh (32)	NT 210 708			Boulder				N	321000	670800	http://www.bgs.ac.uk/data/britrocks/britrocks.cfc?method=viewSamples&sampleId=399654	http://www.largeimages.bgs.ac.uk/iip/britrocks.html?id=110000/112869	http://www.largeimages.bgs.ac.uk/iip/britrocks.html?id=110000/112868
399655		X								0	S266	266	266	266	Geikie,A.	*	'Original entry: Quartz-Dolerite'	1	Roseburn Brewery, near Coltbridge, W of Edinburgh._x000D_Edinburgh (32)	Edinburgh (32)	NT 232 730			"diabase" (whinstone)				N	323200	673000	http://www.bgs.ac.uk/data/britrocks/britrocks.cfc?method=viewSamples&sampleId=399655	http://www.largeimages.bgs.ac.uk/iip/britrocks.html?id=110000/112911	http://www.largeimages.bgs.ac.uk/iip/britrocks.html?id=110000/112910
276532										0	S267	267	267	267	Geikie,A.	*	'Original entry: Hornblende Gneiss'	1	Rispond._x000D_SCOTLAND._x000D_Tongue (114)	Tongue (114)	NC 45 65	SCOTLAND						N	245000	965000	http://www.bgs.ac.uk/data/britrocks/britrocks.cfc?method=viewSamples&sampleId=276532	http://www.largeimages.bgs.ac.uk/iip/britrocks.html?id=110000/112909	http://www.largeimages.bgs.ac.uk/iip/britrocks.html?id=110000/112908
292444								X		0	S268; S268/A; S268/B;	268	268	268	Geikie,A.	*	'Original entry: Hornblende Gneiss'	1	Cape Wrath._x000D_SCOTLAND._x000D_Cape Wrath (113)	Cape Wrath (113)	NC 26 74	SCOTLAND						N	226000	974000	http://www.bgs.ac.uk/data/britrocks/britrocks.cfc?method=viewSamples&sampleId=292444	http://www.largeimages.bgs.ac.uk/iip/britrocks.html?id=110000/112913	http://www.largeimages.bgs.ac.uk/iip/britrocks.html?id=110000/112912	http://www.largeimages.bgs.ac.uk/iip/britrocks.html?id=110000/112915	http://www.largeimages.bgs.ac.uk/iip/britrocks.html?id=110000/112914
276533										0	S269; S269/A; S269/B;	269	269	269	Geikie,A.	*	'Original entry: Hornblende Gneiss'	1	Rispond._x000D_SCOTLAND._x000D_Tongue (114)	Tongue (114)	NC 45 65	SCOTLAND						N	245000	965000	http://www.bgs.ac.uk/data/britrocks/britrocks.cfc?method=viewSamples&sampleId=276533	http://www.largeimages.bgs.ac.uk/iip/britrocks.html?id=110000/112917	http://www.largeimages.bgs.ac.uk/iip/britrocks.html?id=110000/112916	http://www.largeimages.bgs.ac.uk/iip/britrocks.html?id=110000/112919	http://www.largeimages.bgs.ac.uk/iip/britrocks.html?id=110000/112918
292445								X		0	S270; S270/A; S270/B; S270/C;	270	270	270	Geikie,A.	*	'Original entry: Quartz-Feldspar Grit'	1	Cape Wrath._x000D_SCOTLAND._x000D_Cape Wrath (113)	Cape Wrath (113)	NC 258 743	SCOTLAND		Torridon				N	225800	974300	http://www.bgs.ac.uk/data/britrocks/britrocks.cfc?method=viewSamples&sampleId=292445	http://www.largeimages.bgs.ac.uk/iip/britrocks.html?id=110000/112921	http://www.largeimages.bgs.ac.uk/iip/britrocks.html?id=110000/112920	http://www.largeimages.bgs.ac.uk/iip/britrocks.html?id=110000/112923	http://www.largeimages.bgs.ac.uk/iip/britrocks.html?id=110000/112922	http://www.largeimages.bgs.ac.uk/iip/britrocks.html?id=110000/112925	http://www.largeimages.bgs.ac.uk/iip/britrocks.html?id=110000/112924
276534										0	S271; S271/A; S271/B;	271	271	271	Geikie,A.	*	'Original entry: Quartzite'	1	Loch Eriboll._x000D_SCOTLAND._x000D_Tongue (114)	Tongue (114)		SCOTLAND						N			http://www.bgs.ac.uk/data/britrocks/britrocks.cfc?method=viewSamples&sampleId=276534	http://www.largeimages.bgs.ac.uk/iip/britrocks.html?id=110000/112927	http://www.largeimages.bgs.ac.uk/iip/britrocks.html?id=110000/112926,	http://www.largeimages.bgs.ac.uk/iip/britrocks.html?id=110000/112929	http://www.largeimages.bgs.ac.uk/iip/britrocks.html?id=110000/112928
276535										0	S272	272	272	272	Geikie,A.	*		0	Faraid Head._x000D_SCOTLAND._x000D_Tongue (114)	Tongue (114)	NC 39 71	SCOTLAND						N	239000	971000	http://www.bgs.ac.uk/data/britrocks/britrocks.cfc?method=viewSamples&sampleId=276535	http://www.largeimages.bgs.ac.uk/iip/britrocks.html?id=110000/112931	http://www.largeimages.bgs.ac.uk/iip/britrocks.html?id=110000/112930
276536										0	S273	273	273	273	Geikie,A.	*	'Original entry: Hornblende Gneiss'	1	Between Coldbackie and Bettyhill._x000D_SCOTLAND._x000D_Tongue (114)	Tongue (114)	NC 59 57	SCOTLAND						N	259000	957000	http://www.bgs.ac.uk/data/britrocks/britrocks.cfc?method=viewSamples&sampleId=276536	http://www.largeimages.bgs.ac.uk/iip/britrocks.html?id=110000/112933	http://www.largeimages.bgs.ac.uk/iip/britrocks.html?id=110000/112932
276537										0	S274	274	274	274	Geikie,A.	*	'Original entry: Amazonstone'	1	Tongue._x000D_SCOTLAND._x000D_Tongue (114)	Tongue (114)		SCOTLAND						N			http://www.bgs.ac.uk/data/britrocks/britrocks.cfc?method=viewSamples&sampleId=276537	http://www.largeimages.bgs.ac.uk/iip/britrocks.html?id=110000/112935	http://www.largeimages.bgs.ac.uk/iip/britrocks.html?id=110000/112934
399656		X								0	S275	275	275	275	Geikie,A.	*	'Original entry: Olivine Dolerite'	1	Corstorphine Hill._x000D_Edinburgh (32)	Edinburgh (32)	NT 20 74			Dolerite (ophitic) t				N	320000	674000	http://www.bgs.ac.uk/data/britrocks/britrocks.cfc?method=viewSamples&sampleId=399656	http://www.largeimages.bgs.ac.uk/iip/britrocks.html?id=110000/112937	http://www.largeimages.bgs.ac.uk/iip/britrocks.html?id=110000/112936
399657		X								0	S278	278	278	278	Geikie,A.	*	'Original entry: ?Basalt Or Andesite'	1	Warklaw Hill, on road, S side of reservoir._x000D_Edinburgh (32)	Edinburgh (32)	NT 2028 6717							N	320280	667170	http://www.bgs.ac.uk/data/britrocks/britrocks.cfc?method=viewSamples&sampleId=399657	http://www.largeimages.bgs.ac.uk/iip/britrocks.html?id=110000/112945	http://www.largeimages.bgs.ac.uk/iip/britrocks.html?id=110000/112944
399658		X								0	S279	279	279	279	Geikie,A.	*	'Original entry: ?Trachyte (Partly Silicified)'	1	Torduff Hill, NE side._x000D_Edinburgh (32)	Edinburgh (32)	NT 208 675			Decomposed				N	320800	667500	http://www.bgs.ac.uk/data/britrocks/britrocks.cfc?method=viewSamples&sampleId=399658	http://www.largeimages.bgs.ac.uk/iip/britrocks.html?id=110000/112947	http://www.largeimages.bgs.ac.uk/iip/britrocks.html?id=110000/112946
399659		X								0	S280	280	280	280	Geikie,A.	*	'Original entry: ?Trachyte (Partly Silicified)'	1	Torduff Hill, NE side._x000D_Edinburgh (32)	Edinburgh (32)	NT 208 675			Decomposed				N	320800	667500	http://www.bgs.ac.uk/data/britrocks/britrocks.cfc?method=viewSamples&sampleId=399659	http://www.largeimages.bgs.ac.uk/iip/britrocks.html?id=110000/112949	http://www.largeimages.bgs.ac.uk/iip/britrocks.html?id=110000/112948
399660		X								0	S281	281	281	281	Geikie,A.	*	'Original entry: Felsite'	1	Capelaw Hill, above Dean Burn, Pentlands._x000D_Edinburgh (32)	Edinburgh (32)	NT 215 662			Possibly felsitic ash f				N	321500	666200	http://www.bgs.ac.uk/data/britrocks/britrocks.cfc?method=viewSamples&sampleId=399660	http://www.largeimages.bgs.ac.uk/iip/britrocks.html?id=110000/112951	http://www.largeimages.bgs.ac.uk/iip/britrocks.html?id=110000/112950
399661		X								0	S282	282	282	282	Geikie,A.	*	'Original entry: Rhyolite'	1	N end of Capelaw Hill._x000D_Edinburgh (32)	Edinburgh (32)	NT 2167 6661							N	321670	666610	http://www.bgs.ac.uk/data/britrocks/britrocks.cfc?method=viewSamples&sampleId=399661	http://www.largeimages.bgs.ac.uk/iip/britrocks.html?id=110000/112953	http://www.largeimages.bgs.ac.uk/iip/britrocks.html?id=110000/112952
399752		X								0	S283	283	283	283	Geikie,A.	*	'Original entry: Andesite'	1	Dean Burn, Pentlands._x000D_Edinburgh (32)	Edinburgh (32)	NT 210 671			"porphyrite" h				N	321000	667100	http://www.bgs.ac.uk/data/britrocks/britrocks.cfc?method=viewSamples&sampleId=399752	http://www.largeimages.bgs.ac.uk/iip/britrocks.html?id=110000/112955	http://www.largeimages.bgs.ac.uk/iip/britrocks.html?id=110000/112954
399753		X								0	S284	284	284	284	Geikie,A.	*	'Original entry: Basalt'	1	Dean Burn, E side of Torduff._x000D_Edinburgh (32)	Edinburgh (32)	NT 210 671							N	321000	667100	http://www.bgs.ac.uk/data/britrocks/britrocks.cfc?method=viewSamples&sampleId=399753	http://www.largeimages.bgs.ac.uk/iip/britrocks.html?id=110000/112957	http://www.largeimages.bgs.ac.uk/iip/britrocks.html?id=110000/112956
399754		X								0	S285	285	285	285	Geikie,A.	*	'Original entry: ?Basalt Or Andesite'	1	Old quarry, E of Bonaly Pond._x000D_Edinburgh (32)	Edinburgh (32)	NT 2153 6752			"porphyrite" h				N	321530	667520	http://www.bgs.ac.uk/data/britrocks/britrocks.cfc?method=viewSamples&sampleId=399754	http://www.largeimages.bgs.ac.uk/iip/britrocks.html?id=110000/112959	http://www.largeimages.bgs.ac.uk/iip/britrocks.html?id=110000/112958
399755		X								0	S286	286	286	286	Geikie,A.	*	'Original entry: Basalt'	1	Dean Burn, Pentlands._x000D_Edinburgh (32)	Edinburgh (32)	NT 210 671			"porphyrite" h				N	321000	667100	http://www.bgs.ac.uk/data/britrocks/britrocks.cfc?method=viewSamples&sampleId=399755	http://www.largeimages.bgs.ac.uk/iip/britrocks.html?id=110000/112961	http://www.largeimages.bgs.ac.uk/iip/britrocks.html?id=110000/112960
376281			X							0	S288	288	288	288	Geikie,A.	*	'Original entry: Felsite'	1	Near top of Tinto._x000D_SCOTLAND._x000D_Hamilton (23)	Hamilton (23)	NS 95 34	SCOTLAND		Felsite				N	295000	634000	http://www.bgs.ac.uk/data/britrocks/britrocks.cfc?method=viewSamples&sampleId=376281	http://www.largeimages.bgs.ac.uk/iip/britrocks.html?id=110000/112965	http://www.largeimages.bgs.ac.uk/iip/britrocks.html?id=110000/112964
376282			X							0	S289	289	289	289	Geikie,A.	*	'Original entry: Trachytoid Plagiophyre'	1	Pap Craig Tinto._x000D_SCOTLAND._x000D_Hamilton (23)	Hamilton (23)	NS 955 339	SCOTLAND		Trachytoid plagiophyre				N	295500	633900	http://www.bgs.ac.uk/data/britrocks/britrocks.cfc?method=viewSamples&sampleId=376282	http://www.largeimages.bgs.ac.uk/iip/britrocks.html?id=110000/112967	http://www.largeimages.bgs.ac.uk/iip/britrocks.html?id=110000/112966
399756		X								0	S290	290	290	290	Geikie,A.	*	'Original entry: Andesite'	1	Caiyside Quarry, Pentlands (?Fairmilehead, cf. S 506)._x000D_Edinburgh (32)	Edinburgh (32)	NT 2411 6823			"felstone"				N	324110	668230	http://www.bgs.ac.uk/data/britrocks/britrocks.cfc?method=viewSamples&sampleId=399756	http://www.largeimages.bgs.ac.uk/iip/britrocks.html?id=110000/112969	http://www.largeimages.bgs.ac.uk/iip/britrocks.html?id=110000/112968
382925						X				0	S291	291	291	291	Geikie,A.	*	'Original entry: Andesite'	1	Little Seggie (now Seggie Bank), Ochils._x000D_SCOTLAND._x000D_Kinross (40)	Kinross (40)	NO 093 063	SCOTLAND						N	309300	706300	http://www.bgs.ac.uk/data/britrocks/britrocks.cfc?method=viewSamples&sampleId=382925	http://www.largeimages.bgs.ac.uk/iip/britrocks.html?id=110000/112971	http://www.largeimages.bgs.ac.uk/iip/britrocks.html?id=110000/112970
399757		X								0	S292	292	292	292	Geikie,A.	*	'Original entry: Basalt Or Andesite'	1	N side of Shearie Knowe, N end of Pentlands._x000D_Edinburgh (32)	Edinburgh (32)	NT 2304 6739			"like a clinkstone"				N	323040	667390	http://www.bgs.ac.uk/data/britrocks/britrocks.cfc?method=viewSamples&sampleId=399757	http://www.largeimages.bgs.ac.uk/iip/britrocks.html?id=110000/112973	http://www.largeimages.bgs.ac.uk/iip/britrocks.html?id=110000/112972
399758		X								0	S293; S293/A; S293/B;	293	293	293	Geikie,A.	*	'Original entry: ?Basalt Or Andesite'	1	N side of Torduff Reservoir, Warklaw Hill._x000D_Edinburgh (32)	Edinburgh (32)	NT 204 675			Altered olivine dolerite.				N	320400	667500	http://www.bgs.ac.uk/data/britrocks/britrocks.cfc?method=viewSamples&sampleId=399758	http://www.largeimages.bgs.ac.uk/iip/britrocks.html?id=110000/112975	http://www.largeimages.bgs.ac.uk/iip/britrocks.html?id=110000/112974	http://www.largeimages.bgs.ac.uk/iip/britrocks.html?id=110000/112977	http://www.largeimages.bgs.ac.uk/iip/britrocks.html?id=110000/112976
399759		X								0	S294	294	294	294	Geikie,A.	*	'Original entry: Basalt'	1	N side of NE end of Loganlee Reservoir._x000D_Edinburgh (32)	Edinburgh (32)	NT 197 626							N	319700	662600	http://www.bgs.ac.uk/data/britrocks/britrocks.cfc?method=viewSamples&sampleId=399759	http://www.largeimages.bgs.ac.uk/iip/britrocks.html?id=110000/112979	http://www.largeimages.bgs.ac.uk/iip/britrocks.html?id=110000/112978
399760		X								0	S295	295	295	295	Geikie,A.	*	'Original entry: Andesite'	1	Railway cutting NE of Harburn._x000D_Edinburgh (32)	Edinburgh (32)	NT 0486 6207							N	304860	662070	http://www.bgs.ac.uk/data/britrocks/britrocks.cfc?method=viewSamples&sampleId=399760	http://www.largeimages.bgs.ac.uk/iip/britrocks.html?id=110000/112981	http://www.largeimages.bgs.ac.uk/iip/britrocks.html?id=110000/112980
399761		X								0	S296	296	296	296	Geikie,A.	*	'Original entry: Felsite Or Granite Porphyry'	1	North Black Hill, Pentlands._x000D_Edinburgh (32)	Edinburgh (32)	NT 18 63			"tuff"				N	318000	663000	http://www.bgs.ac.uk/data/britrocks/britrocks.cfc?method=viewSamples&sampleId=399761	http://www.largeimages.bgs.ac.uk/iip/britrocks.html?id=110000/112983	http://www.largeimages.bgs.ac.uk/iip/britrocks.html?id=110000/112982
399762		X								0	S297	297	297	297	Geikie,A.	*	'Original entry: ?Andesite'	1	S side of Torduff Reservoir._x000D_Edinburgh (32)	Edinburgh (32)	NT 204 673			"porphyrite"				N	320400	667300	http://www.bgs.ac.uk/data/britrocks/britrocks.cfc?method=viewSamples&sampleId=399762	http://www.largeimages.bgs.ac.uk/iip/britrocks.html?id=110000/112985	http://www.largeimages.bgs.ac.uk/iip/britrocks.html?id=110000/112984
399763		X								0	S298	298	298	298	Geikie,A.	*	'Original entry: ?Basalt Or Andesite'	1	E of Hillend Hill, Pentlands._x000D_Edinburgh (32)	Edinburgh (32)	NT 248 664							N	324800	666400	http://www.bgs.ac.uk/data/britrocks/britrocks.cfc?method=viewSamples&sampleId=399763	http://www.largeimages.bgs.ac.uk/iip/britrocks.html?id=110000/112987	http://www.largeimages.bgs.ac.uk/iip/britrocks.html?id=110000/112986
399764		X								0	S299	299	299	299	Geikie,A.	*	'Original entry: Augite Andesite'	1	White Hill, SW corner of White Hill Plantation._x000D_Edinburgh (32)	Edinburgh (32)	NT 2165 6730							N	321650	667300	http://www.bgs.ac.uk/data/britrocks/britrocks.cfc?method=viewSamples&sampleId=399764	http://www.largeimages.bgs.ac.uk/iip/britrocks.html?id=110000/112989	http://www.largeimages.bgs.ac.uk/iip/britrocks.html?id=110000/112988
399765		X								0	S300	300	300	300	Geikie,A.	*	'Original entry: Andesite'	1	West Kip Hill, Pentlands._x000D_Edinburgh (32)	Edinburgh (32)	NT 178 606							N	317800	660600	http://www.bgs.ac.uk/data/britrocks/britrocks.cfc?method=viewSamples&sampleId=399765	http://www.largeimages.bgs.ac.uk/iip/britrocks.html?id=110000/112991	http://www.largeimages.bgs.ac.uk/iip/britrocks.html?id=110000/112990
399766		X								0	S301	301	301	301	Geikie,A.	*	'Original entry: ?Basaltic Andesite'	1	E end of Hillend Hill, Pentlands._x000D_Edinburgh (32)	Edinburgh (32)	NT 248 664			Decomposed				N	324800	666400	http://www.bgs.ac.uk/data/britrocks/britrocks.cfc?method=viewSamples&sampleId=399766	http://www.largeimages.bgs.ac.uk/iip/britrocks.html?id=110000/112993	http://www.largeimages.bgs.ac.uk/iip/britrocks.html?id=110000/112992
399767		X								0	S302	302	302	302	Geikie,A.	*	'Original entry: Andesite?'	1	East Kip Hill, Pentlands._x000D_Edinburgh (32)	Edinburgh (32)	NT 182 608			"porphyrite"				N	318200	660800	http://www.bgs.ac.uk/data/britrocks/britrocks.cfc?method=viewSamples&sampleId=399767	http://www.largeimages.bgs.ac.uk/iip/britrocks.html?id=110000/112995	http://www.largeimages.bgs.ac.uk/iip/britrocks.html?id=110000/112994
399768		X								0	S303	303	303	303	Geikie,A.	*	'Original entry: ?Basalt Or Andesite'	1	N side of Torduff Reservoir._x000D_Edinburgh (32)	Edinburgh (32)	NT 206 677			"porphyrite"				N	320600	667700	http://www.bgs.ac.uk/data/britrocks/britrocks.cfc?method=viewSamples&sampleId=399768	http://www.largeimages.bgs.ac.uk/iip/britrocks.html?id=110000/112997	http://www.largeimages.bgs.ac.uk/iip/britrocks.html?id=110000/112996
399769		X								0	S304	304	304	304	Geikie,A.	*	'Original entry: Tuff Or Breccia'	1	Quarry between Scald Law and Carnethy._x000D_Edinburgh (32)	Edinburgh (32)	NT 1960 6160							N	319600	661600	http://www.bgs.ac.uk/data/britrocks/britrocks.cfc?method=viewSamples&sampleId=399769	http://www.largeimages.bgs.ac.uk/iip/britrocks.html?id=110000/112999	http://www.largeimages.bgs.ac.uk/iip/britrocks.html?id=110000/112998
399770		X								0	S305	305	305	305	Geikie,A.	*	'Original entry: Tuff Or Breccia'	1	Top of Caerketton Hill, Pentlands._x000D_Edinburgh (32)	Edinburgh (32)	NT 237 662							N	323700	666200	http://www.bgs.ac.uk/data/britrocks/britrocks.cfc?method=viewSamples&sampleId=399770	http://www.largeimages.bgs.ac.uk/iip/britrocks.html?id=110000/113001	http://www.largeimages.bgs.ac.uk/iip/britrocks.html?id=110000/113000
399771		X								0	S306	306	306	306	Geikie,A.	*	'Original entry: Tuff Or Breccia'	1	Mouth of Howlets House Burn, Pentlands._x000D_Edinburgh (32)	Edinburgh (32)	NT 1943 6247							N	319430	662470	http://www.bgs.ac.uk/data/britrocks/britrocks.cfc?method=viewSamples&sampleId=399771	http://www.largeimages.bgs.ac.uk/iip/britrocks.html?id=110000/113003	http://www.largeimages.bgs.ac.uk/iip/britrocks.html?id=110000/113002
376283			X							0	S307	307	307	307	Geikie,A.	*	'Original entry: Quartz Porphyry'	1	Near farm of Tintoside._x000D_SCOTLAND._x000D_Hamilton (23)	Hamilton (23)	NS 969 339	SCOTLAND		Quartz porphyry				N	296900	633900	http://www.bgs.ac.uk/data/britrocks/britrocks.cfc?method=viewSamples&sampleId=376283	http://www.largeimages.bgs.ac.uk/iip/britrocks.html?id=110000/113005	http://www.largeimages.bgs.ac.uk/iip/britrocks.html?id=110000/113004
399772		X								0	S308	308	308	308	Geikie,A.	*	'Original entry: Trachyte'	1	Braid Hills._x000D_Edinburgh (32)	Edinburgh (32)	NT 25 69							N	325000	669000	http://www.bgs.ac.uk/data/britrocks/britrocks.cfc?method=viewSamples&sampleId=399772	http://www.largeimages.bgs.ac.uk/iip/britrocks.html?id=110000/113007	http://www.largeimages.bgs.ac.uk/iip/britrocks.html?id=110000/113006
399773		X								0	S309	309	309	309	Geikie,A.	*	'Original entry: Granite Porphyry'	1	Glen between Bell's Hill and Harbour Hill._x000D_Edinburgh (32)	Edinburgh (32)	NT 207 647							N	320700	664700	http://www.bgs.ac.uk/data/britrocks/britrocks.cfc?method=viewSamples&sampleId=399773	http://www.largeimages.bgs.ac.uk/iip/britrocks.html?id=110000/113009	http://www.largeimages.bgs.ac.uk/iip/britrocks.html?id=110000/113008
399774		X								0	S310	310	310	310	Geikie,A.	*	'Original entry: Tuff'	1	Walstone Hill, 11 miles S of Edinburgh._x000D_Edinburgh (32)	Edinburgh (32)	NT 183 586			Fine tuff				N	318300	658600	http://www.bgs.ac.uk/data/britrocks/britrocks.cfc?method=viewSamples&sampleId=399774	http://www.largeimages.bgs.ac.uk/iip/britrocks.html?id=110000/113011	http://www.largeimages.bgs.ac.uk/iip/britrocks.html?id=110000/113010
399775		X								0	S311	311	311	311	Geikie,A.	*	'Original entry: Granite Porphyry'	1	Cleugh Maid, between Bell's Hill and Harbour Hill._x000D_Edinburgh (32)	Edinburgh (32)	NT 2058 6480							N	320580	664800	http://www.bgs.ac.uk/data/britrocks/britrocks.cfc?method=viewSamples&sampleId=399775	http://www.largeimages.bgs.ac.uk/iip/britrocks.html?id=110000/113013	http://www.largeimages.bgs.ac.uk/iip/britrocks.html?id=110000/113012
399776		X								0	S311a	311	311	311	Geikie,A.	*	'Original entry: Granite Porphyry'	1	Cleugh Maid, between Bell's Hill and Harbour Hill._x000D_Edinburgh (32)	Edinburgh (32)	NT 2058 6480							N	320580	664800	http://www.bgs.ac.uk/data/britrocks/britrocks.cfc?method=viewSamples&sampleId=399776
399777		X								0	S312	312	312	312	Geikie,A.	*	'Original entry: Trachyte'	1	Above Woodhouselee, Pentlands._x000D_Edinburgh (32)	Edinburgh (32)	NT 230 640							N	323000	664000	http://www.bgs.ac.uk/data/britrocks/britrocks.cfc?method=viewSamples&sampleId=399777	http://www.largeimages.bgs.ac.uk/iip/britrocks.html?id=110000/113015	http://www.largeimages.bgs.ac.uk/iip/britrocks.html?id=110000/113014
376965										0	S313; S313/A; S313/B;	313	313	313	Geikie,A.	*	'Original entry: Soda Felsite'	1	E side of Black Mount Dolphinton._x000D_SCOTLAND._x000D_Peebles (24)	Peebles (24)	NT 09 45	SCOTLAND		Soda felsite				N	309000	645000	http://www.bgs.ac.uk/data/britrocks/britrocks.cfc?method=viewSamples&sampleId=376965	http://www.largeimages.bgs.ac.uk/iip/britrocks.html?id=110000/113017	http://www.largeimages.bgs.ac.uk/iip/britrocks.html?id=110000/113016	http://www.largeimages.bgs.ac.uk/iip/britrocks.html?id=110000/113019	http://www.largeimages.bgs.ac.uk/iip/britrocks.html?id=110000/113018
399778		X								0	S314	314	314	314	Geikie,A.	*	'Original entry: Tuff Of Basaltic Or Andesitic Character'	1	N side of Loganlee Reservoir._x000D_Edinburgh (32)	Edinburgh (32)	NT 19 62			"tuff"				N	319000	662000	http://www.bgs.ac.uk/data/britrocks/britrocks.cfc?method=viewSamples&sampleId=399778	http://www.largeimages.bgs.ac.uk/iip/britrocks.html?id=110000/113021	http://www.largeimages.bgs.ac.uk/iip/britrocks.html?id=110000/113020
399779		X								0	S315	315	315	315	Geikie,A.	*	'Original entry: Tuff'	1	SW side of Castlelaw Hill, Pentlands._x000D_Edinburgh (32)	Edinburgh (32)	NT 218 645			"tuff"				N	321800	664500	http://www.bgs.ac.uk/data/britrocks/britrocks.cfc?method=viewSamples&sampleId=399779	http://www.largeimages.bgs.ac.uk/iip/britrocks.html?id=110000/113023	http://www.largeimages.bgs.ac.uk/iip/britrocks.html?id=110000/113022
399780		X								0	S316	316	316	316	Geikie,A.	*	'Original entry: Tuff Or Breccia'	1	Ridge between Scald Law and Carnethy._x000D_Edinburgh (32)	Edinburgh (32)	NT 195 615			"tuff"				N	319500	661500	http://www.bgs.ac.uk/data/britrocks/britrocks.cfc?method=viewSamples&sampleId=399780	http://www.largeimages.bgs.ac.uk/iip/britrocks.html?id=110000/113025	http://www.largeimages.bgs.ac.uk/iip/britrocks.html?id=110000/113024
399781		X								0	S317	317	317	317	Geikie,A.	*	'Original entry: Tuff'	1	Walstone, 11 miles S of Edinburgh._x000D_Edinburgh (32)	Edinburgh (32)	NT 183 586			"tuff"				N	318300	658600	http://www.bgs.ac.uk/data/britrocks/britrocks.cfc?method=viewSamples&sampleId=399781	http://www.largeimages.bgs.ac.uk/iip/britrocks.html?id=110000/113027	http://www.largeimages.bgs.ac.uk/iip/britrocks.html?id=110000/113026
399782		X								0	S318a	318	318	318	Geikie,A.	*	'Original entry: Tuff'	1	Walstone, 11 miles S of Edinburgh._x000D_Edinburgh (32)	Edinburgh (32)	NT 183 586			"tuff"				N	318300	658600	http://www.bgs.ac.uk/data/britrocks/britrocks.cfc?method=viewSamples&sampleId=399782
399783	X									0	S318b	318	318	318	Geikie,A.	*	'Original entry: Tuff'	1	Walstone, 11 miles S of Edinburgh._x000D_Haddington (33)	Haddington (33)	NT 183 586			"tuff"				N	318300	658600	http://www.bgs.ac.uk/data/britrocks/britrocks.cfc?method=viewSamples&sampleId=399783
399784		X								0	S319; S319/A; S319/B;	319	319	319	Geikie,A.	*	'Original entry: Felsite Or Rhyolite?'	1	Top of Caerketton Hill, Pentlands._x000D_Edinburgh (32)	Edinburgh (32)	NT 237 662			"brecciated tuff"				N	323700	666200	http://www.bgs.ac.uk/data/britrocks/britrocks.cfc?method=viewSamples&sampleId=399784	http://www.largeimages.bgs.ac.uk/iip/britrocks.html?id=110000/113033	http://www.largeimages.bgs.ac.uk/iip/britrocks.html?id=110000/113032	http://www.largeimages.bgs.ac.uk/iip/britrocks.html?id=110000/113035	http://www.largeimages.bgs.ac.uk/iip/britrocks.html?id=110000/113034
399785		X								0	S320; S320/A; S320/B; S320/C;	320	320	320	Geikie,A.	*	'Original entry: Tuff Of Basaltic Or Andesitic Character'	1	Loganlee Reservoir._x000D_Edinburgh (32)	Edinburgh (32)	NT 19 62			Decomposed f				N	319000	662000	http://www.bgs.ac.uk/data/britrocks/britrocks.cfc?method=viewSamples&sampleId=399785	http://www.largeimages.bgs.ac.uk/iip/britrocks.html?id=110000/113037	http://www.largeimages.bgs.ac.uk/iip/britrocks.html?id=110000/113036	http://www.largeimages.bgs.ac.uk/iip/britrocks.html?id=110000/113039	http://www.largeimages.bgs.ac.uk/iip/britrocks.html?id=110000/113038	http://www.largeimages.bgs.ac.uk/iip/britrocks.html?id=110000/113041	http://www.largeimages.bgs.ac.uk/iip/britrocks.html?id=110000/113040
285501										0	S322; S322/A; S322/B;	322	322	322	Geikie,A.	*	'Original entry: Diabase'	1	NW end of Hoy._x000D_SCOTLAND._x000D_Kirkwall (119)	Kirkwall (119)	HY 20 04	SCOTLAND		Lava bed; upper ors				N	320100	1004700	http://www.bgs.ac.uk/data/britrocks/britrocks.cfc?method=viewSamples&sampleId=285501	http://www.largeimages.bgs.ac.uk/iip/britrocks.html?id=110000/113047	http://www.largeimages.bgs.ac.uk/iip/britrocks.html?id=110000/113046	http://www.largeimages.bgs.ac.uk/iip/britrocks.html?id=110000/113049	http://www.largeimages.bgs.ac.uk/iip/britrocks.html?id=110000/113048
285531										0	S323; S323/A; S323/B;	323	323	323	Geikie,A.	*	'Original entry: Diabase'	1	NW end of Hoy._x000D_SCOTLAND._x000D_Kirkwall (119)	Kirkwall (119)	HY 201 047	SCOTLAND		Lava bed; upper ors				N	320100	1004700	http://www.bgs.ac.uk/data/britrocks/britrocks.cfc?method=viewSamples&sampleId=285531	http://www.largeimages.bgs.ac.uk/iip/britrocks.html?id=110000/113051	http://www.largeimages.bgs.ac.uk/iip/britrocks.html?id=110000/113050	http://www.largeimages.bgs.ac.uk/iip/britrocks.html?id=110000/113053	http://www.largeimages.bgs.ac.uk/iip/britrocks.html?id=110000/113052
285913										0	S324	324	324	324	Geikie,A.	*	'Original entry: Diabase'	1	NW end of Hoy._x000D_SCOTLAND._x000D_Kirkwall (119)	Kirkwall (119)	HY 201 047	SCOTLAND		Lava bed; upper ors				N	320100	1004700	http://www.bgs.ac.uk/data/britrocks/britrocks.cfc?method=viewSamples&sampleId=285913	http://www.largeimages.bgs.ac.uk/iip/britrocks.html?id=110000/113055	http://www.largeimages.bgs.ac.uk/iip/britrocks.html?id=110000/113054
292555										0	S325	325	325	325	Geikie,A.	*	'Original entry: Tuff (With Sandstone Fragments)'	1	On shore, John o'Groats._x000D_SCOTLAND._x000D_Wick (116)	Wick (116)	ND 388 736	SCOTLAND		"neck"				N	338800	973600	http://www.bgs.ac.uk/data/britrocks/britrocks.cfc?method=viewSamples&sampleId=292555	http://www.largeimages.bgs.ac.uk/iip/britrocks.html?id=110000/113057	http://www.largeimages.bgs.ac.uk/iip/britrocks.html?id=110000/113056
292556										0	S326	326	326	326	Geikie,A.	*	'Original entry: Nepheline Basalt'	1	On shore, John o'Groats._x000D_SCOTLAND._x000D_Wick (116)	Wick (116)	ND 388 736	SCOTLAND		"neck"; bomb in neck				N	338800	973600	http://www.bgs.ac.uk/data/britrocks/britrocks.cfc?method=viewSamples&sampleId=292556	http://www.largeimages.bgs.ac.uk/iip/britrocks.html?id=110000/113059	http://www.largeimages.bgs.ac.uk/iip/britrocks.html?id=110000/113058
292557										0	S327	327	327	327	Geikie,A.	*	'Original entry: Nepheline Basalt'	1	On shore, John o'Groats._x000D_SCOTLAND._x000D_Wick (116)	Wick (116)	ND 388 736	SCOTLAND		Dyke in side of neck; glassy base of dyke				N	338800	973600	http://www.bgs.ac.uk/data/britrocks/britrocks.cfc?method=viewSamples&sampleId=292557	http://www.largeimages.bgs.ac.uk/iip/britrocks.html?id=110000/113061	http://www.largeimages.bgs.ac.uk/iip/britrocks.html?id=110000/113060
292559										0	S328/A	328	328	328	Geikie,A.	*	'Original entry: Nepheline Basalt'	1	On shore, John o'Groats._x000D_SCOTLAND._x000D_Wick (116)	Wick (116)	ND 388 736	SCOTLAND		Intrusion, mass in neck; quartz and feldspar xenocrysts				N	338800	973600	http://www.bgs.ac.uk/data/britrocks/britrocks.cfc?method=viewSamples&sampleId=292559	http://www.largeimages.bgs.ac.uk/iip/britrocks.html?id=110000/113065	http://www.largeimages.bgs.ac.uk/iip/britrocks.html?id=110000/113064
292558										0	S328; S328/A;	328	328	328	Geikie,A.	*	'Original entry: Nepheline Basalt'	1	On shore, John o'Groats._x000D_SCOTLAND._x000D_Wick (116)	Wick (116)	ND 388 736	SCOTLAND		Intrusion, mass in neck; quartz and feldspar xenocrysts				N	338800	973600	http://www.bgs.ac.uk/data/britrocks/britrocks.cfc?method=viewSamples&sampleId=292558	http://www.largeimages.bgs.ac.uk/iip/britrocks.html?id=110000/113063	http://www.largeimages.bgs.ac.uk/iip/britrocks.html?id=110000/113062
292560										0	S329	329	329	329	Geikie,A.	*	'Original entry: Augite'	1	On shore, John o'Groats._x000D_SCOTLAND._x000D_Wick (116)	Wick (116)	ND 388 736	SCOTLAND		From mass in tuff of neck				N	338800	973600	http://www.bgs.ac.uk/data/britrocks/britrocks.cfc?method=viewSamples&sampleId=292560	http://www.largeimages.bgs.ac.uk/iip/britrocks.html?id=110000/113067	http://www.largeimages.bgs.ac.uk/iip/britrocks.html?id=110000/113066
284960										0	S330	330	330	330	Geikie,A.	*	'Original entry: Limestone (Biotite)'	1	Galcantry, near Nairn._x000D_SCOTLAND._x000D_Nairn (84)	Nairn (84)	NH 803 482	SCOTLAND		(in o r sandstone)				N	280300	848200	http://www.bgs.ac.uk/data/britrocks/britrocks.cfc?method=viewSamples&sampleId=284960	http://www.largeimages.bgs.ac.uk/iip/britrocks.html?id=110000/113069	http://www.largeimages.bgs.ac.uk/iip/britrocks.html?id=110000/113068
284961										0	S331	331	331	331	Geikie,A.	*	'Original entry: Limestone (Biotite)'	1	Balfriesh, Nairn._x000D_SCOTLAND._x000D_Nairn (84)	Nairn (84)	NH 797 476	SCOTLAND		Cornstone				N	279700	847600	http://www.bgs.ac.uk/data/britrocks/britrocks.cfc?method=viewSamples&sampleId=284961	http://www.largeimages.bgs.ac.uk/iip/britrocks.html?id=110000/113071	http://www.largeimages.bgs.ac.uk/iip/britrocks.html?id=110000/113070
354991										0	S333	333	333	333	Geikie,A.	*	'Original entry: Camptonite'	1	Above Spean Bridge._x000D_SCOTLAND._x000D_Loch Eil (62)	Loch Eil (62)	NN 222 815	SCOTLAND		Dyke in metamorphic rocks				N	222200	781500	http://www.bgs.ac.uk/data/britrocks/britrocks.cfc?method=viewSamples&sampleId=354991	http://www.largeimages.bgs.ac.uk/iip/britrocks.html?id=110000/113075	http://www.largeimages.bgs.ac.uk/iip/britrocks.html?id=110000/113074
282935										0	S334	334	334	334	Geikie,A.	*	'Original entry: Basalt'	1	Ericht below Rannagulzion._x000D_SCOTLAND._x000D_Blairgowrie (56)	Blairgowrie (56)	NO 1645 5063	SCOTLAND		Porphyrite; 2nd bed (lava)				N	316450	750630	http://www.bgs.ac.uk/data/britrocks/britrocks.cfc?method=viewSamples&sampleId=282935	http://www.largeimages.bgs.ac.uk/iip/britrocks.html?id=110000/113077	http://www.largeimages.bgs.ac.uk/iip/britrocks.html?id=110000/113076
275723										0	S337	337	337	337	Geikie,A.	*	'Original entry: Quartz Porphyry'	1	Stonehaven._x000D_SCOTLAND._x000D_Stonehaven (67)	Stonehaven (67)	NO 88 87	SCOTLAND		Block in ors				N	388000	787000	http://www.bgs.ac.uk/data/britrocks/britrocks.cfc?method=viewSamples&sampleId=275723	http://www.largeimages.bgs.ac.uk/iip/britrocks.html?id=110000/113083	http://www.largeimages.bgs.ac.uk/iip/britrocks.html?id=110000/113082
275724										0	S339	339	339	339	Geikie,A.	*	'Original entry: Dolerite'	1	Stonehaven._x000D_SCOTLAND._x000D_Stonehaven (67)	Stonehaven (67)	NO 88 87	SCOTLAND		Lowest porphyrite bed				N	388000	787000	http://www.bgs.ac.uk/data/britrocks/britrocks.cfc?method=viewSamples&sampleId=275724	http://www.largeimages.bgs.ac.uk/iip/britrocks.html?id=110000/113087	http://www.largeimages.bgs.ac.uk/iip/britrocks.html?id=110000/113086
368223						X				0	S340	340	340	340	Geikie,A.	*	'Original entry: Olivine-Basalt'	1	Broughty Ferry Castle._x000D_SCOTLAND._x000D_Arbroath (49)	Arbroath (49)	NO 465 305	SCOTLAND		Decomposed				N	346500	730500	http://www.bgs.ac.uk/data/britrocks/britrocks.cfc?method=viewSamples&sampleId=368223	http://www.largeimages.bgs.ac.uk/iip/britrocks.html?id=110000/113089	http://www.largeimages.bgs.ac.uk/iip/britrocks.html?id=110000/113088
375830			X							0	S441	441	441	441	Geikie,A.	*	'Original entry: Hornblende Pyroxene Porphyrite'	1	Craig Linn rock, Pockmuir Burn._x000D_SCOTLAND._x000D_Hamilton (23)	Hamilton (23)	NS 769 338	SCOTLAND		Hornblende pyroxene porphyrite				N	276900	633800	http://www.bgs.ac.uk/data/britrocks/britrocks.cfc?method=viewSamples&sampleId=375830	http://www.largeimages.bgs.ac.uk/iip/britrocks.html?id=110000/113667	http://www.largeimages.bgs.ac.uk/iip/britrocks.html?id=110000/113666
376284			X							0	S442	442	442	442	Geikie,A.	*	'Original entry: Felspar-Phyric Pyroxene Andesite'	1	Parkhall Burn, about 3 miles SE of Douglas._x000D_SCOTLAND._x000D_Hamilton (23)	Hamilton (23)	NS 86 29	SCOTLAND		Felspar-phyric pyroxene andesite				N	286000	629000	http://www.bgs.ac.uk/data/britrocks/britrocks.cfc?method=viewSamples&sampleId=376284	http://www.largeimages.bgs.ac.uk/iip/britrocks.html?id=110000/113669	http://www.largeimages.bgs.ac.uk/iip/britrocks.html?id=110000/113668
376285			X							0	S443	443	443	443	Geikie,A.	*	'Original entry: Felsite'	1	Parkhall Burn, 100 yards further up than S442 (about 3 miles SE of Douglas)._x000D_SCOTLAND._x000D_Hamilton (23)	Hamilton (23)	NS 86 29	SCOTLAND		Felsite				N	286000	629000	http://www.bgs.ac.uk/data/britrocks/britrocks.cfc?method=viewSamples&sampleId=376285	http://www.largeimages.bgs.ac.uk/iip/britrocks.html?id=110000/113671	http://www.largeimages.bgs.ac.uk/iip/britrocks.html?id=110000/113670
376286			X							0	S444	444	444	444	Geikie,A.	*	'Original entry: Pyroxene Andesite, Iron Stained'	1	Quarry Pagie Road, 1 mile S of Douglas._x000D_SCOTLAND._x000D_Hamilton (23)	Hamilton (23)	NS 84 29	SCOTLAND		Pyroxene andesite, iron stained				N	284000	629000	http://www.bgs.ac.uk/data/britrocks/britrocks.cfc?method=viewSamples&sampleId=376286	http://www.largeimages.bgs.ac.uk/iip/britrocks.html?id=110000/113673	http://www.largeimages.bgs.ac.uk/iip/britrocks.html?id=110000/113672
376287			X							0	S445	445	445	445	Geikie,A.	*	'Original entry: Olivine Basalt'	1	Mansfield, Greenock Water, 1 mile N of Muirkirk._x000D_SCOTLAND._x000D_Hamilton (23)	Hamilton (23)	NS 69 29	SCOTLAND		Olivine basalt				N	269000	629000	http://www.bgs.ac.uk/data/britrocks/britrocks.cfc?method=viewSamples&sampleId=376287	http://www.largeimages.bgs.ac.uk/iip/britrocks.html?id=110000/113675	http://www.largeimages.bgs.ac.uk/iip/britrocks.html?id=110000/113674
376288			X							0	S446	446	446	446	Geikie,A.	*	'Original entry: Quartz Microdiorite'	1	Pagie Quarry, 1.5 miles N of Muirkirk._x000D_SCOTLAND._x000D_Hamilton (23)	Hamilton (23)		SCOTLAND		Quartz microdiorite				N			http://www.bgs.ac.uk/data/britrocks/britrocks.cfc?method=viewSamples&sampleId=376288	http://www.largeimages.bgs.ac.uk/iip/britrocks.html?id=110000/113677	http://www.largeimages.bgs.ac.uk/iip/britrocks.html?id=110000/113676
375831			X							0	S447	447	447	447	Geikie,A.	*	'Original entry: Quartz Porphyry'	1	Parkhall Burn, 3 miles SE of Douglas._x000D_SCOTLAND._x000D_Hamilton (23)	Hamilton (23)	NS 86 29	SCOTLAND		Quartz porphyry				N	286000	629000	http://www.bgs.ac.uk/data/britrocks/britrocks.cfc?method=viewSamples&sampleId=375831	http://www.largeimages.bgs.ac.uk/iip/britrocks.html?id=110000/113679	http://www.largeimages.bgs.ac.uk/iip/britrocks.html?id=110000/113678
376289			X							0	S448	448	448	448	Geikie,A.	*	'Original entry: Fractured Andesite'	1	Parkhall Burn, 3 miles SE of Douglas._x000D_SCOTLAND._x000D_Hamilton (23)	Hamilton (23)	NS 86 29	SCOTLAND		Fractured andesite				N	286000	629000	http://www.bgs.ac.uk/data/britrocks/britrocks.cfc?method=viewSamples&sampleId=376289	http://www.largeimages.bgs.ac.uk/iip/britrocks.html?id=110000/113681	http://www.largeimages.bgs.ac.uk/iip/britrocks.html?id=110000/113680
376290			X							0	S449	449	449	449	Geikie,A.	*	'Original entry: Fresh Pyroxene Andesite'	1	Parkhall Burn, 3 miles SE of Douglas._x000D_SCOTLAND._x000D_Hamilton (23)	Hamilton (23)	NS 86 29	SCOTLAND		Fresh pyroxene andesite				N	286000	629000	http://www.bgs.ac.uk/data/britrocks/britrocks.cfc?method=viewSamples&sampleId=376290	http://www.largeimages.bgs.ac.uk/iip/britrocks.html?id=110000/113683	http://www.largeimages.bgs.ac.uk/iip/britrocks.html?id=110000/113682
376291			X							0	S450	450	450	450	Geikie,A.	*	'Original entry: Felsite'	1	Parkhall Burn, 3 miles SE of Douglas._x000D_SCOTLAND._x000D_Hamilton (23)	Hamilton (23)	NS 86 29	SCOTLAND		Felsite				N	286000	629000	http://www.bgs.ac.uk/data/britrocks/britrocks.cfc?method=viewSamples&sampleId=376291	http://www.largeimages.bgs.ac.uk/iip/britrocks.html?id=110000/113685	http://www.largeimages.bgs.ac.uk/iip/britrocks.html?id=110000/113684
376292			X							0	S451	451	451	451	Geikie,A.	*	'Original entry: Slaggy Top Of Andesite'	1	Parkhall Burn, 3 miles SE of Douglas._x000D_SCOTLAND._x000D_Hamilton (23)	Hamilton (23)	NS 86 29	SCOTLAND		Slaggy top of andesite				N	286000	629000	http://www.bgs.ac.uk/data/britrocks/britrocks.cfc?method=viewSamples&sampleId=376292	http://www.largeimages.bgs.ac.uk/iip/britrocks.html?id=110000/113687	http://www.largeimages.bgs.ac.uk/iip/britrocks.html?id=110000/113686
376293			X							0	S452	452	452	452	Geikie,A.	*	'Original entry: Quartz Porphyry'	1	Dundaff Quarry, near Boghead, 2.5 miles NW of Lesmahagow._x000D_SCOTLAND._x000D_Hamilton (23)	Hamilton (23)	NS 779 400	SCOTLAND		Quartz porphyry				N	277900	640000	http://www.bgs.ac.uk/data/britrocks/britrocks.cfc?method=viewSamples&sampleId=376293	http://www.largeimages.bgs.ac.uk/iip/britrocks.html?id=110000/113689	http://www.largeimages.bgs.ac.uk/iip/britrocks.html?id=110000/113688
376294			X							0	S453	453	453	453	Geikie,A.	*	'Original entry: Slaggy Olivine Basalt'	1	Parkhall Burn, 3.5 miles SE of Douglas._x000D_SCOTLAND._x000D_Hamilton (23)	Hamilton (23)	NS 86 29	SCOTLAND		Slaggy olivine basalt				N	286000	629000	http://www.bgs.ac.uk/data/britrocks/britrocks.cfc?method=viewSamples&sampleId=376294	http://www.largeimages.bgs.ac.uk/iip/britrocks.html?id=110000/113691	http://www.largeimages.bgs.ac.uk/iip/britrocks.html?id=110000/113690
376295			X							0	S454	454	454	454	Geikie,A.	*	'Original entry: Quartz Porphyry'	1	Penesk Water, Muirkirk._x000D_SCOTLAND._x000D_Hamilton (23)	Hamilton (23)	NS 71 30	SCOTLAND		Quartz porphyry				N	271000	630000	http://www.bgs.ac.uk/data/britrocks/britrocks.cfc?method=viewSamples&sampleId=376295	http://www.largeimages.bgs.ac.uk/iip/britrocks.html?id=110000/113693	http://www.largeimages.bgs.ac.uk/iip/britrocks.html?id=110000/113692
376296			X							0	S455	455	455	455	Geikie,A.	*	'Original entry: Decomposed Basaltic Rock'	1	Quarry, roadside, Parkhead Lord's house._x000D_SCOTLAND._x000D_Hamilton (23)	Hamilton (23)	NS 86 30	SCOTLAND		Decomposed basaltic rock				N	286000	630000	http://www.bgs.ac.uk/data/britrocks/britrocks.cfc?method=viewSamples&sampleId=376296	http://www.largeimages.bgs.ac.uk/iip/britrocks.html?id=110000/113695	http://www.largeimages.bgs.ac.uk/iip/britrocks.html?id=110000/113694
376297			X							0	S456	456	456	456	Geikie,A.	*	'Original entry: Fresh Pyroxene Andesite'	1	Quarry, roadside, Parkhead Lord's house._x000D_SCOTLAND._x000D_Hamilton (23)	Hamilton (23)	NS 86 30	SCOTLAND		Fresh pyroxene andesite				N	286000	630000	http://www.bgs.ac.uk/data/britrocks/britrocks.cfc?method=viewSamples&sampleId=376297	http://www.largeimages.bgs.ac.uk/iip/britrocks.html?id=110000/113697	http://www.largeimages.bgs.ac.uk/iip/britrocks.html?id=110000/113696
376298			X							0	S458	458	458	458	Geikie,A.	*	'Original entry: Sodaclase Biolite Prophyrite'	1	Meikle Auchinstilloch._x000D_SCOTLAND._x000D_Hamilton (23)	Hamilton (23)	NS 75 32	SCOTLAND		Sodaclase biolite prophyrite				N	275000	632000	http://www.bgs.ac.uk/data/britrocks/britrocks.cfc?method=viewSamples&sampleId=376298	http://www.largeimages.bgs.ac.uk/iip/britrocks.html?id=110000/113701	http://www.largeimages.bgs.ac.uk/iip/britrocks.html?id=110000/113700
376299			X							0	S459	459	459	459	Geikie,A.	*	'Original entry: Olivine Basalt'	1	Road, Kirkton dyke, about 0.5 miles S of Douglas._x000D_SCOTLAND._x000D_Hamilton (23)	Hamilton (23)	NS 830 297	SCOTLAND		Olivine basalt				N	283000	629700	http://www.bgs.ac.uk/data/britrocks/britrocks.cfc?method=viewSamples&sampleId=376299	http://www.largeimages.bgs.ac.uk/iip/britrocks.html?id=110000/113703	http://www.largeimages.bgs.ac.uk/iip/britrocks.html?id=110000/113702
376300			X							0	S460	460	460	460	Geikie,A.	*	'Original entry: Felspathic Andesite (?Olivine)'	1	Wildshaw Road, about 4 miles SE of Douglas._x000D_SCOTLAND._x000D_Hamilton (23)	Hamilton (23)		SCOTLAND		Felspathic andesite (?olivine)				N			http://www.bgs.ac.uk/data/britrocks/britrocks.cfc?method=viewSamples&sampleId=376300	http://www.largeimages.bgs.ac.uk/iip/britrocks.html?id=110000/113705	http://www.largeimages.bgs.ac.uk/iip/britrocks.html?id=110000/113704
376301			X							0	S461	461	461	461	Geikie,A.	*	'Original entry: Slaggy Felspar-Phyric Andesite'	1	Parkhall Burn, Douglas._x000D_SCOTLAND._x000D_Hamilton (23)	Hamilton (23)		SCOTLAND		Slaggy felspar-phyric andesite				N			http://www.bgs.ac.uk/data/britrocks/britrocks.cfc?method=viewSamples&sampleId=376301	http://www.largeimages.bgs.ac.uk/iip/britrocks.html?id=110000/113707	http://www.largeimages.bgs.ac.uk/iip/britrocks.html?id=110000/113706
376302			X							0	S462	462	462	462	Geikie,A.	*	'Original entry: Slaggy Pyroxene Andesite (?Olivine)'	1	Parkhall Burn, Douglas._x000D_SCOTLAND._x000D_Hamilton (23)	Hamilton (23)		SCOTLAND		Slaggy pyroxene andesite (?olivine)				N			http://www.bgs.ac.uk/data/britrocks/britrocks.cfc?method=viewSamples&sampleId=376302	http://www.largeimages.bgs.ac.uk/iip/britrocks.html?id=110000/113709	http://www.largeimages.bgs.ac.uk/iip/britrocks.html?id=110000/113708
380585										0	S463	463	463	463	Geikie,A.	*	'Original entry: Granophyric Diorite'	1	Tillycoultry._x000D_SCOTLAND._x000D_Stirling (39)	Stirling (39)	NS 913 977	SCOTLAND		Basalt; intrusive in coal measures				N	291300	697700	http://www.bgs.ac.uk/data/britrocks/britrocks.cfc?method=viewSamples&sampleId=380585	http://www.largeimages.bgs.ac.uk/iip/britrocks.html?id=110000/113711	http://www.largeimages.bgs.ac.uk/iip/britrocks.html?id=110000/113710
376303			X							0	S464	464	464	464	Geikie,A.	*	'Original entry: Albitized Doleritic Microdiorite'	1	Pap Craig Tinto._x000D_SCOTLAND._x000D_Hamilton (23)	Hamilton (23)	NS 959 339	SCOTLAND		Albitized doleritic microdiorite				N	295900	633900	http://www.bgs.ac.uk/data/britrocks/britrocks.cfc?method=viewSamples&sampleId=376303	http://www.largeimages.bgs.ac.uk/iip/britrocks.html?id=110000/113713	http://www.largeimages.bgs.ac.uk/iip/britrocks.html?id=110000/113712
376304			X							0	S465	465	465	465	Geikie,A.	*	'Original entry: Trachytoid Plagiophyre'	1	Pap Craig Tinto, from near top of mass._x000D_SCOTLAND._x000D_Hamilton (23)	Hamilton (23)	NS 959 339	SCOTLAND		Trachytoid plagiophyre				N	295900	633900	http://www.bgs.ac.uk/data/britrocks/britrocks.cfc?method=viewSamples&sampleId=376304	http://www.largeimages.bgs.ac.uk/iip/britrocks.html?id=110000/113715	http://www.largeimages.bgs.ac.uk/iip/britrocks.html?id=110000/113714
376305			X							0	S466	466	466	466	Geikie,A.	*	'Original entry: Dolerite Microdiorite, Ophitic Dolerite'	1	Pap Craig Tinto, from near base of mass._x000D_SCOTLAND._x000D_Hamilton (23)	Hamilton (23)	NS 959 339	SCOTLAND		Dolerite microdiorite, ophitic dolerite, fresh ophitic uniaxial pyroxene				N	295900	633900	http://www.bgs.ac.uk/data/britrocks/britrocks.cfc?method=viewSamples&sampleId=376305	http://www.largeimages.bgs.ac.uk/iip/britrocks.html?id=110000/113717	http://www.largeimages.bgs.ac.uk/iip/britrocks.html?id=110000/113716
376306			X							0	S467	467	467	467	Geikie,A.	*	'Original entry: Albitized Microdiorite, Dolerite'	1	Pap Craig Tinto._x000D_SCOTLAND._x000D_Hamilton (23)	Hamilton (23)	NS 959 339	SCOTLAND		Albitized microdiorite, dolerite				N	295900	633900	http://www.bgs.ac.uk/data/britrocks/britrocks.cfc?method=viewSamples&sampleId=376306	http://www.largeimages.bgs.ac.uk/iip/britrocks.html?id=110000/113719	http://www.largeimages.bgs.ac.uk/iip/britrocks.html?id=110000/113718
376307			X							0	S468	468	468	468	Geikie,A.	*	'Original entry: Felsite (Tintoite)'	1	Felstone of Tinto._x000D_SCOTLAND._x000D_Hamilton (23)	Hamilton (23)	NS 95 34	SCOTLAND		Felsite (tintoite)				N	295000	634000	http://www.bgs.ac.uk/data/britrocks/britrocks.cfc?method=viewSamples&sampleId=376307	http://www.largeimages.bgs.ac.uk/iip/britrocks.html?id=110000/113721	http://www.largeimages.bgs.ac.uk/iip/britrocks.html?id=110000/113720
376308			X							0	S469	469	469	469	Geikie,A.	*	'Original entry: Felsite (Tintoite)'	1	Felstone of Tinto._x000D_SCOTLAND._x000D_Hamilton (23)	Hamilton (23)	NS 95 34	SCOTLAND		Felsite (tintoite)				N	295000	634000	http://www.bgs.ac.uk/data/britrocks/britrocks.cfc?method=viewSamples&sampleId=376308	http://www.largeimages.bgs.ac.uk/iip/britrocks.html?id=110000/113723	http://www.largeimages.bgs.ac.uk/iip/britrocks.html?id=110000/113722
376309			X							0	S470	470	470	470	Geikie,A.	*	'Original entry: Felsite (Tintoite)'	1	Felstone of Tinto._x000D_SCOTLAND._x000D_Hamilton (23)	Hamilton (23)	NS 95 34	SCOTLAND		Felsite (tintoite)				N	295000	634000	http://www.bgs.ac.uk/data/britrocks/britrocks.cfc?method=viewSamples&sampleId=376309	http://www.largeimages.bgs.ac.uk/iip/britrocks.html?id=110000/113725	http://www.largeimages.bgs.ac.uk/iip/britrocks.html?id=110000/113724
376310			X							0	S471	471	471	471	Geikie,A.	*	'Original entry: Felsite (Tintoite)'	1	Felstone of Tinto._x000D_SCOTLAND._x000D_Hamilton (23)	Hamilton (23)	NS 95 34	SCOTLAND		Felsite (tintoite)				N	295000	634000	http://www.bgs.ac.uk/data/britrocks/britrocks.cfc?method=viewSamples&sampleId=376310	http://www.largeimages.bgs.ac.uk/iip/britrocks.html?id=110000/113727	http://www.largeimages.bgs.ac.uk/iip/britrocks.html?id=110000/113726
275725										0	S507	507	507	507	Geikie,A.	*	'Original entry: Altered Andesite'	1	Crawton Bay._x000D_SCOTLAND._x000D_Stonehaven (67)	Stonehaven (67)	NO 878 796	SCOTLAND		"bedded p"; uppersheet				N	387800	779600	http://www.bgs.ac.uk/data/britrocks/britrocks.cfc?method=viewSamples&sampleId=275725	http://www.largeimages.bgs.ac.uk/iip/britrocks.html?id=110000/113817	http://www.largeimages.bgs.ac.uk/iip/britrocks.html?id=110000/113816
275726										0	S508	508	508	508	Geikie,A.	*	'Original entry: Porphyrite'	1	Near Crawton (same as at Trolochy)._x000D_SCOTLAND._x000D_Stonehaven (67)	Stonehaven (67)	NO 879 796	SCOTLAND		"bedded p"; lower sheet				N	387900	779600	http://www.bgs.ac.uk/data/britrocks/britrocks.cfc?method=viewSamples&sampleId=275726	http://www.largeimages.bgs.ac.uk/iip/britrocks.html?id=110000/113819	http://www.largeimages.bgs.ac.uk/iip/britrocks.html?id=110000/113818
275727										0	S509	509	509	509	Geikie,A.	*	'Original entry: Porphyrite'	1	Trolochy near Crawton village._x000D_SCOTLAND._x000D_Stonehaven (67)	Stonehaven (67)	NO 880 798	SCOTLAND		"bedded p"; labrador porphyrite				N	388000	779800	http://www.bgs.ac.uk/data/britrocks/britrocks.cfc?method=viewSamples&sampleId=275727	http://www.largeimages.bgs.ac.uk/iip/britrocks.html?id=110000/113821	http://www.largeimages.bgs.ac.uk/iip/britrocks.html?id=110000/113820
275728										0	S510; S510/A; S510/B;	510	510	510	Geikie,A.	*	'Original entry: Porphyrite'	1	Roadside quarry below Uras Farm, 1.5 mile S of Dunnottar Castle._x000D_SCOTLAND._x000D_Stonehaven (67)	Stonehaven (67)	NO 876 817	SCOTLAND		"bedded p"				N	387600	781700	http://www.bgs.ac.uk/data/britrocks/britrocks.cfc?method=viewSamples&sampleId=275728	http://www.largeimages.bgs.ac.uk/iip/britrocks.html?id=110000/113823	http://www.largeimages.bgs.ac.uk/iip/britrocks.html?id=110000/113822	http://www.largeimages.bgs.ac.uk/iip/britrocks.html?id=110000/113825	http://www.largeimages.bgs.ac.uk/iip/britrocks.html?id=110000/113824
275729										0	S511	511	511	511	Geikie,A.	*	'Original entry: Porphyrite'	1	N of Kinghornie Farm, N of Bervie._x000D_SCOTLAND._x000D_Stonehaven (67)	Stonehaven (67)	NO 839 729	SCOTLAND		"bedded p"				N	383900	772900	http://www.bgs.ac.uk/data/britrocks/britrocks.cfc?method=viewSamples&sampleId=275729	http://www.largeimages.bgs.ac.uk/iip/britrocks.html?id=110000/113827	http://www.largeimages.bgs.ac.uk/iip/britrocks.html?id=110000/113826
275730										0	S512	512	512	512	Geikie,A.	*	'Original entry: Porphyrite'	1	Below Kinghornie Farm, N of Bervie._x000D_SCOTLAND._x000D_Stonehaven (67)	Stonehaven (67)	NO 8335 7277	SCOTLAND		"bedded p"				N	383350	772770	http://www.bgs.ac.uk/data/britrocks/britrocks.cfc?method=viewSamples&sampleId=275730	http://www.largeimages.bgs.ac.uk/iip/britrocks.html?id=110000/113829	http://www.largeimages.bgs.ac.uk/iip/britrocks.html?id=110000/113828
275731										0	S513	513	513	513	Geikie,A.	*	'Original entry: Augite Andesite'	1	Whistleberry road end, Kinneff._x000D_SCOTLAND._x000D_Stonehaven (67)	Stonehaven (67)	NO 8560 7536	SCOTLAND		"bedded p": ?section missing				N	385600	775360	http://www.bgs.ac.uk/data/britrocks/britrocks.cfc?method=viewSamples&sampleId=275731	http://www.largeimages.bgs.ac.uk/iip/britrocks.html?id=110000/113831	http://www.largeimages.bgs.ac.uk/iip/britrocks.html?id=110000/113830
275632										0	S514	514	514	514	Geikie,A.	*	'Original entry: Porphyrite'	1	Whistleberry road end, Kinneff._x000D_SCOTLAND._x000D_Stonehaven (67)	Stonehaven (67)	NO 8560 7536	SCOTLAND		"bedded p"				N	385600	775360	http://www.bgs.ac.uk/data/britrocks/britrocks.cfc?method=viewSamples&sampleId=275632	http://www.largeimages.bgs.ac.uk/iip/britrocks.html?id=110000/113833	http://www.largeimages.bgs.ac.uk/iip/britrocks.html?id=110000/113832
275633										0	S515	515	515	515	Geikie,A.	*	'Original entry: Dolerite'	1	Todhead, S of Catterline._x000D_SCOTLAND._x000D_Stonehaven (67)	Stonehaven (67)	NO 870 769	SCOTLAND		"bedded p"				N	387000	776900	http://www.bgs.ac.uk/data/britrocks/britrocks.cfc?method=viewSamples&sampleId=275633	http://www.largeimages.bgs.ac.uk/iip/britrocks.html?id=110000/113835	http://www.largeimages.bgs.ac.uk/iip/britrocks.html?id=110000/113834
275634										0	S516	516	516	516	Geikie,A.	*	'Original entry: Porphyrite'	1	Tremuda Bay, 1 mile S of Dunnottar Castle._x000D_SCOTLAND._x000D_Stonehaven (67)	Stonehaven (67)	NO 879 829	SCOTLAND		"bedded p"				N	387900	782900	http://www.bgs.ac.uk/data/britrocks/britrocks.cfc?method=viewSamples&sampleId=275634	http://www.largeimages.bgs.ac.uk/iip/britrocks.html?id=110000/113837	http://www.largeimages.bgs.ac.uk/iip/britrocks.html?id=110000/113836
276048										0	S517	517	517	517	Geikie,A.	*	'Original entry: Pyroxene Porphyrite'	1	Arbuthnot._x000D_SCOTLAND._x000D_Banchory (66)	Banchory (66)	NO 803 743	SCOTLAND		"bedded p"				N	380300	774300	http://www.bgs.ac.uk/data/britrocks/britrocks.cfc?method=viewSamples&sampleId=276048	http://www.largeimages.bgs.ac.uk/iip/britrocks.html?id=110000/113839	http://www.largeimages.bgs.ac.uk/iip/britrocks.html?id=110000/113838
276049										0	S518	518	518	518	Geikie,A.	*	'Original entry: Pyroxene Porphyrite'	1	Arbuthnot._x000D_SCOTLAND._x000D_Banchory (66)	Banchory (66)	NO 803 743	SCOTLAND		"bedded p"				N	380300	774300	http://www.bgs.ac.uk/data/britrocks/britrocks.cfc?method=viewSamples&sampleId=276049	http://www.largeimages.bgs.ac.uk/iip/britrocks.html?id=110000/113841	http://www.largeimages.bgs.ac.uk/iip/britrocks.html?id=110000/113840
276050										0	S519	519	519	519	Geikie,A.	*	'Original entry: Porphyrite'	1	Arbuthnot._x000D_SCOTLAND._x000D_Banchory (66)	Banchory (66)	NO 803 743	SCOTLAND		"bedded p"				N	380300	774300	http://www.bgs.ac.uk/data/britrocks/britrocks.cfc?method=viewSamples&sampleId=276050	http://www.largeimages.bgs.ac.uk/iip/britrocks.html?id=110000/113843	http://www.largeimages.bgs.ac.uk/iip/britrocks.html?id=110000/113842
276051										0	S520	520	520	520	Geikie,A.	*	'Original entry: Augite Porphyrite'	1	Knock Hill, S of Glenbervie House._x000D_SCOTLAND._x000D_Banchory (66)	Banchory (66)	NO 760 800	SCOTLAND		"bedded p"; dark glass				N	376000	780000	http://www.bgs.ac.uk/data/britrocks/britrocks.cfc?method=viewSamples&sampleId=276051	http://www.largeimages.bgs.ac.uk/iip/britrocks.html?id=110000/113845	http://www.largeimages.bgs.ac.uk/iip/britrocks.html?id=110000/113844
276052										0	S521	521	521	521	Geikie,A.	*	'Original entry: Olivine Basalt'	1	N side of Knock Hill, S of Glenbervie House._x000D_SCOTLAND._x000D_Banchory (66)	Banchory (66)	NO 760 802	SCOTLAND						N	376000	780200	http://www.bgs.ac.uk/data/britrocks/britrocks.cfc?method=viewSamples&sampleId=276052	http://www.largeimages.bgs.ac.uk/iip/britrocks.html?id=110000/113847	http://www.largeimages.bgs.ac.uk/iip/britrocks.html?id=110000/113846
275635										0	S522	522	522	522	Geikie,A.	*	'Original entry: Porphyrite'	1	Roadside near Kinneff._x000D_SCOTLAND._x000D_Stonehaven (67)	Stonehaven (67)	NO 854 751	SCOTLAND						N	385400	775100	http://www.bgs.ac.uk/data/britrocks/britrocks.cfc?method=viewSamples&sampleId=275635	http://www.largeimages.bgs.ac.uk/iip/britrocks.html?id=110000/113849	http://www.largeimages.bgs.ac.uk/iip/britrocks.html?id=110000/113848
275636										0	S523	523	523	523	Geikie,A.	*	'Original entry: Porphyrite'	1	Bench below Nether Knox Farm, S of Gourdon._x000D_SCOTLAND._x000D_Stonehaven (67)	Stonehaven (67)	NO 8210 7003	SCOTLAND		Sheet 57a				N	382100	770030	http://www.bgs.ac.uk/data/britrocks/britrocks.cfc?method=viewSamples&sampleId=275636	http://www.largeimages.bgs.ac.uk/iip/britrocks.html?id=110000/113851	http://www.largeimages.bgs.ac.uk/iip/britrocks.html?id=110000/113850
275637										0	S524	524	524	524	Geikie,A.	*	'Original entry: Porphyrite'	1	Roadside quarry below Uras Farm, 1.5 mile S of Dunnottar Castle._x000D_SCOTLAND._x000D_Stonehaven (67)	Stonehaven (67)	NO 876 817	SCOTLAND						N	387600	781700	http://www.bgs.ac.uk/data/britrocks/britrocks.cfc?method=viewSamples&sampleId=275637	http://www.largeimages.bgs.ac.uk/iip/britrocks.html?id=110000/113853	http://www.largeimages.bgs.ac.uk/iip/britrocks.html?id=110000/113852
276007										0	S525	525	525	525	Geikie,A.	*	'Original entry: Porphyrite'	1	Burnhead, Glenbervie._x000D_SCOTLAND._x000D_Banchory (66)	Banchory (66)	NO 765 810	SCOTLAND		?dyke or bedded (intrusive)				N	376500	781000	http://www.bgs.ac.uk/data/britrocks/britrocks.cfc?method=viewSamples&sampleId=276007	http://www.largeimages.bgs.ac.uk/iip/britrocks.html?id=110000/113855	http://www.largeimages.bgs.ac.uk/iip/britrocks.html?id=110000/113854
275638										0	S526	526	526	526	Geikie,A.	*	'Original entry: Porphyrite'	1	Big Rob's Cove, 1 mile N of Bervie._x000D_SCOTLAND._x000D_Stonehaven (67)	Stonehaven (67)	NO 8445 7300	SCOTLAND		Intrusive sheet				N	384450	773000	http://www.bgs.ac.uk/data/britrocks/britrocks.cfc?method=viewSamples&sampleId=275638	http://www.largeimages.bgs.ac.uk/iip/britrocks.html?id=110000/113857	http://www.largeimages.bgs.ac.uk/iip/britrocks.html?id=110000/113856
275639										0	S527	527	527	527	Geikie,A.	*	'Original entry: Porphyrite'	1	Horse Crook Bay, S of Bervie._x000D_SCOTLAND._x000D_Stonehaven (67)	Stonehaven (67)	NO 8320 7116	SCOTLAND		Intrusive rock				N	383200	771160	http://www.bgs.ac.uk/data/britrocks/britrocks.cfc?method=viewSamples&sampleId=275639	http://www.largeimages.bgs.ac.uk/iip/britrocks.html?id=110000/113859	http://www.largeimages.bgs.ac.uk/iip/britrocks.html?id=110000/113858
275640										0	S528	528	528	528	Geikie,A.	*	'Original entry: Quartz Porphyry'	1	1 mile S of Kinneff._x000D_SCOTLAND._x000D_Stonehaven (67)	Stonehaven (67)	NO 8495 7385	SCOTLAND		Dyke (?lintrathen type)				N	384950	773850	http://www.bgs.ac.uk/data/britrocks/britrocks.cfc?method=viewSamples&sampleId=275640	http://www.largeimages.bgs.ac.uk/iip/britrocks.html?id=110000/113861	http://www.largeimages.bgs.ac.uk/iip/britrocks.html?id=110000/113860
275641										0	S529; MR11160;	529	529	529	Geikie,A.	*	'Original entry: Dolerite'	1	Railway cutting, NW of Findon, 8 1/2ml. N of Stonehaven._x000D_SCOTLAND._x000D_Stonehaven (67)	Stonehaven (67)	NO 9292 9794	SCOTLAND		Dyke (tholeiite)				N	392920	797940	http://www.bgs.ac.uk/data/britrocks/britrocks.cfc?method=viewSamples&sampleId=275641	http://www.largeimages.bgs.ac.uk/iip/britrocks.html?id=110000/113863	http://www.largeimages.bgs.ac.uk/iip/britrocks.html?id=110000/113862
275642										0	S530	530	530	530	Geikie,A.	*	'Original entry: Quartz Porphyry'	1	Allardice Castle, 1.5 mile W of Bervie._x000D_SCOTLAND._x000D_Stonehaven (67)	Stonehaven (67)	NO 818 738	SCOTLAND		Dyke (microgranite)				N	381800	773800	http://www.bgs.ac.uk/data/britrocks/britrocks.cfc?method=viewSamples&sampleId=275642	http://www.largeimages.bgs.ac.uk/iip/britrocks.html?id=110000/113865	http://www.largeimages.bgs.ac.uk/iip/britrocks.html?id=110000/113864
321619										0	S531	531	531	531	Geikie,A.	*	'Original entry: Porphyrite'	1	Papa Stour._x000D_SCOTLAND._x000D_West Shetland ? (127)	West Shetland ? (127)		SCOTLAND						N			http://www.bgs.ac.uk/data/britrocks/britrocks.cfc?method=viewSamples&sampleId=321619	http://www.largeimages.bgs.ac.uk/iip/britrocks.html?id=110000/113867	http://www.largeimages.bgs.ac.uk/iip/britrocks.html?id=110000/113866
322137										0	S532; S532/A; S532/B;	532	532	532	Geikie,A.	*	'Original entry: Felsite'	1	Papa Stour._x000D_SCOTLAND._x000D_West Shetland ? (127)	West Shetland ? (127)		SCOTLAND						N			http://www.bgs.ac.uk/data/britrocks/britrocks.cfc?method=viewSamples&sampleId=322137	http://www.largeimages.bgs.ac.uk/iip/britrocks.html?id=110000/113869	http://www.largeimages.bgs.ac.uk/iip/britrocks.html?id=110000/113868	http://www.largeimages.bgs.ac.uk/iip/britrocks.html?id=110000/113871	http://www.largeimages.bgs.ac.uk/iip/britrocks.html?id=110000/113870
271616										0	S613	613	613	613	Geikie,A.	*	'Original entry: Sillimanite Gneiss'	1	S end of Strathy Point._x000D_SCOTLAND._x000D_Reay (115)	Reay (115)	NC 826 690	SCOTLAND						N	282600	969000	http://www.bgs.ac.uk/data/britrocks/britrocks.cfc?method=viewSamples&sampleId=271616	http://www.largeimages.bgs.ac.uk/iip/britrocks.html?id=110000/115141	http://www.largeimages.bgs.ac.uk/iip/britrocks.html?id=110000/115140
402429							X			0	S614	614	614	614	Geikie,A.	*	'Original entry: Red, Andesitic, Glassy Rock Hht'	1	Moss Mulloch._x000D_Kilmarnock (22)	Kilmarnock (22)	NS 27 45			Red, andesitic, glassy rock - contact with sediment hht; passage gp lava				N	227000	645000	http://www.bgs.ac.uk/data/britrocks/britrocks.cfc?method=viewSamples&sampleId=402429	http://www.largeimages.bgs.ac.uk/iip/britrocks.html?id=110000/115143	http://www.largeimages.bgs.ac.uk/iip/britrocks.html?id=110000/115142
275643										0	S642	642	642	642	Geikie,A.	*	'Original entry: Quartz Porphyry'	1	Gourdon shore._x000D_SCOTLAND._x000D_Stonehaven (67)	Stonehaven (67)	NO 830 708	SCOTLAND						N	383000	770800	http://www.bgs.ac.uk/data/britrocks/britrocks.cfc?method=viewSamples&sampleId=275643	http://www.largeimages.bgs.ac.uk/iip/britrocks.html?id=110000/115209	http://www.largeimages.bgs.ac.uk/iip/britrocks.html?id=110000/115208
282936										0	S643	643	643	643	Geikie,A.	*	'Original entry: Quartz Porphyry'	1	Reekie Linn._x000D_SCOTLAND._x000D_Blairgowrie (56)	Blairgowrie (56)	NO 2540 5371	SCOTLAND						N	325400	753710	http://www.bgs.ac.uk/data/britrocks/britrocks.cfc?method=viewSamples&sampleId=282936	http://www.largeimages.bgs.ac.uk/iip/britrocks.html?id=110000/115211	http://www.largeimages.bgs.ac.uk/iip/britrocks.html?id=110000/115210
275644										0	S644	644	644	644	Geikie,A.	*	'Original entry: Serpentine'	1	Gourdon shore._x000D_SCOTLAND._x000D_Stonehaven (67)	Stonehaven (67)	NO 832 710	SCOTLAND						N	383200	771000	http://www.bgs.ac.uk/data/britrocks/britrocks.cfc?method=viewSamples&sampleId=275644
382926						X				0	S680	680	680	680	Geikie,A.	*	'Original entry: Cyprid Limestone'	1	Starley Burn._x000D_SCOTLAND._x000D_Kinross (40)	Kinross (40)	NT 2178 8586	SCOTLAND						N	321780	685860	http://www.bgs.ac.uk/data/britrocks/britrocks.cfc?method=viewSamples&sampleId=382926	http://www.largeimages.bgs.ac.uk/iip/britrocks.html?id=110000/115285	http://www.largeimages.bgs.ac.uk/iip/britrocks.html?id=110000/115284
378315				X						0	S729; S729/A; S729/B;	729	729	729	Geikie,A.	*	'Original entry: Tuff(?)'	1	N of Knockside Hills, Largs._x000D_SCOTLAND._x000D_Rothesay (29)	Rothesay (29)	NS 20 62	SCOTLAND		Tuff(?)				N	220000	662000	http://www.bgs.ac.uk/data/britrocks/britrocks.cfc?method=viewSamples&sampleId=378315	http://www.largeimages.bgs.ac.uk/iip/britrocks.html?id=110000/116857	http://www.largeimages.bgs.ac.uk/iip/britrocks.html?id=110000/116856	http://www.largeimages.bgs.ac.uk/iip/britrocks.html?id=110000/116859	http://www.largeimages.bgs.ac.uk/iip/britrocks.html?id=110000/116858
375832			X							0	S730; S730/A; S730/B;	730	730	730	Geikie,A.	*	'Original entry: Cornstone, Limestone'	1	Shielburn, S of Lesmahagow._x000D_SCOTLAND._x000D_Hamilton (23)	Hamilton (23)	NS 808 330	SCOTLAND		Cornstone, limestone				N	280800	633000	http://www.bgs.ac.uk/data/britrocks/britrocks.cfc?method=viewSamples&sampleId=375832	http://www.largeimages.bgs.ac.uk/iip/britrocks.html?id=110000/116861	http://www.largeimages.bgs.ac.uk/iip/britrocks.html?id=110000/116860	http://www.largeimages.bgs.ac.uk/iip/britrocks.html?id=110000/116863	http://www.largeimages.bgs.ac.uk/iip/britrocks.html?id=110000/116862
382927						X				0	S732	732	732	732	Geikie,A.	*	'Original entry: White Trap'	1	Tyrie Bleach Works, shore S of Kirkcaldy._x000D_SCOTLAND._x000D_Kinross (40)	Kinross (40)	NT 2716 8919	SCOTLAND		Intrusion through black shales				N	327160	689190	http://www.bgs.ac.uk/data/britrocks/britrocks.cfc?method=viewSamples&sampleId=382927	http://www.largeimages.bgs.ac.uk/iip/britrocks.html?id=110000/116867	http://www.largeimages.bgs.ac.uk/iip/britrocks.html?id=110000/116866
270861										0	S842; S842/A;	842	842	842	Geikie,A.	*	'Original entry: Limestone'	1	Letterewe, Loch Maree._x000D_SCOTLAND._x000D_Inverbroom (92)	Inverbroom (92)	NG 951 722	SCOTLAND		Crystalline and micaceous; tremolite				N	195100	872200	http://www.bgs.ac.uk/data/britrocks/britrocks.cfc?method=viewSamples&sampleId=270861	http://www.largeimages.bgs.ac.uk/iip/britrocks.html?id=110000/117095	http://www.largeimages.bgs.ac.uk/iip/britrocks.html?id=110000/117094	http://www.largeimages.bgs.ac.uk/iip/britrocks.html?id=110000/117097	http://www.largeimages.bgs.ac.uk/iip/britrocks.html?id=110000/117096
270862										0	S843; S843/A;	843	843	843	Geikie,A.	*	'Original entry: Limestone'	1	Letterewe, Loch Maree._x000D_SCOTLAND._x000D_Inverbroom (92)	Inverbroom (92)	NG 951 722	SCOTLAND		With tremolite and quartz				N	195100	872200	http://www.bgs.ac.uk/data/britrocks/britrocks.cfc?method=viewSamples&sampleId=270862	http://www.largeimages.bgs.ac.uk/iip/britrocks.html?id=110000/117099	http://www.largeimages.bgs.ac.uk/iip/britrocks.html?id=110000/117098	http://www.largeimages.bgs.ac.uk/iip/britrocks.html?id=110000/117101	http://www.largeimages.bgs.ac.uk/iip/britrocks.html?id=110000/117100
270863										0	S844; S844/A;	844	844	844	Geikie,A.	*	'Original entry: Limestone'	1	Letterewe, Loch Maree._x000D_SCOTLAND._x000D_Inverbroom (92)	Inverbroom (92)	NG 951 722	SCOTLAND		Micaceous				N	195100	872200	http://www.bgs.ac.uk/data/britrocks/britrocks.cfc?method=viewSamples&sampleId=270863	http://www.largeimages.bgs.ac.uk/iip/britrocks.html?id=110000/117103	http://www.largeimages.bgs.ac.uk/iip/britrocks.html?id=110000/117102	http://www.largeimages.bgs.ac.uk/iip/britrocks.html?id=110000/117105	http://www.largeimages.bgs.ac.uk/iip/britrocks.html?id=110000/117104
292446								X		0	S845	845	845	845	Geikie,A.	*	'Original entry: Amphibolite?'	1	Cape Wrath._x000D_SCOTLAND._x000D_Cape Wrath (113)	Cape Wrath (113)	NC 26 74	SCOTLAND		Idiomorphic hornblende and epidote				N	226000	974000	http://www.bgs.ac.uk/data/britrocks/britrocks.cfc?method=viewSamples&sampleId=292446	http://www.largeimages.bgs.ac.uk/iip/britrocks.html?id=110000/117107	http://www.largeimages.bgs.ac.uk/iip/britrocks.html?id=110000/117106
276538										0	S846	846	846	846	Geikie,A.	*	'Original entry: Hornblende-Pyroxene Gneiss'	1	Rispond._x000D_SCOTLAND._x000D_Tongue (114)	Tongue (114)	NC 45 65	SCOTLAND		With microcline				N	245000	965000	http://www.bgs.ac.uk/data/britrocks/britrocks.cfc?method=viewSamples&sampleId=276538	http://www.largeimages.bgs.ac.uk/iip/britrocks.html?id=110000/117109	http://www.largeimages.bgs.ac.uk/iip/britrocks.html?id=110000/117108
231053								X		2	S847; COLLNORYF1472;	847	847	847	Geikie,A.	*	'Original entry: Hornblende-Biotite Gneiss'	1	Scourie._x000D_SCOTLAND._x000D_Lochinver (107)	Lochinver (107)	NC 15 44	SCOTLAND		Uralite gneiss				N	215000	944000	http://www.bgs.ac.uk/data/britrocks/britrocks.cfc?method=viewSamples&sampleId=231053	http://www.largeimages.bgs.ac.uk/iip/britrocks.html?id=110000/117111	http://www.largeimages.bgs.ac.uk/iip/britrocks.html?id=110000/117110
231054								X		2	S848; COLLNORYF1473;	848	848	848	Geikie,A.	*	'Original entry: Pyroxene Granulite'	1	Scourie._x000D_SCOTLAND._x000D_Lochinver (107)	Lochinver (107)	NC 15 44	SCOTLAND		Garnets				N	215000	944000	http://www.bgs.ac.uk/data/britrocks/britrocks.cfc?method=viewSamples&sampleId=231054	http://www.largeimages.bgs.ac.uk/iip/britrocks.html?id=110000/117113	http://www.largeimages.bgs.ac.uk/iip/britrocks.html?id=110000/117112
231055								X		2	S849; COLLNORYF1474;	849	849	849	Geikie,A.	*	'Original entry: Hornblende-Biotite Gneiss'	1	Scourie._x000D_SCOTLAND._x000D_Lochinver (107)	Lochinver (107)	NC 15 44	SCOTLAND						N	215000	944000	http://www.bgs.ac.uk/data/britrocks/britrocks.cfc?method=viewSamples&sampleId=231055	http://www.largeimages.bgs.ac.uk/iip/britrocks.html?id=110000/117115	http://www.largeimages.bgs.ac.uk/iip/britrocks.html?id=110000/117114
292447								X		0	S850; S850/A; S850/B; S850/C; S850/D;	850	850	850	Geikie,A.	*	'Original entry: Hornblende Gneiss'	1	Cape Wrath._x000D_SCOTLAND._x000D_Cape Wrath (113)	Cape Wrath (113)	NC 26 74	SCOTLAND		Sphene and epidote				N	226000	974000	http://www.bgs.ac.uk/data/britrocks/britrocks.cfc?method=viewSamples&sampleId=292447	http://www.largeimages.bgs.ac.uk/iip/britrocks.html?id=110000/117117	http://www.largeimages.bgs.ac.uk/iip/britrocks.html?id=110000/117116	http://www.largeimages.bgs.ac.uk/iip/britrocks.html?id=110000/117119	http://www.largeimages.bgs.ac.uk/iip/britrocks.html?id=110000/117118	http://www.largeimages.bgs.ac.uk/iip/britrocks.html?id=110000/117121	http://www.largeimages.bgs.ac.uk/iip/britrocks.html?id=110000/117120	http://www.largeimages.bgs.ac.uk/iip/britrocks.html?id=110000/117123	http://www.largeimages.bgs.ac.uk/iip/britrocks.html?id=110000/117122
276539										0	S851	851	851	851	Geikie,A.	*	'Original entry: Hornblende-Pyroxene Gneiss'	1	Rispond._x000D_SCOTLAND._x000D_Tongue (114)	Tongue (114)	NC 45 65	SCOTLAND		With microcline				N	245000	965000	http://www.bgs.ac.uk/data/britrocks/britrocks.cfc?method=viewSamples&sampleId=276539	http://www.largeimages.bgs.ac.uk/iip/britrocks.html?id=110000/117125	http://www.largeimages.bgs.ac.uk/iip/britrocks.html?id=110000/117124
292448								X		0	S852	852	852	852	Geikie,A.	*	'Original entry: Hornblende Gneiss'	1	Cape Wrath._x000D_SCOTLAND._x000D_Cape Wrath (113)	Cape Wrath (113)	NC 26 74	SCOTLAND		Deeply coloured epidote				N	226000	974000	http://www.bgs.ac.uk/data/britrocks/britrocks.cfc?method=viewSamples&sampleId=292448	http://www.largeimages.bgs.ac.uk/iip/britrocks.html?id=110000/117127	http://www.largeimages.bgs.ac.uk/iip/britrocks.html?id=110000/117126
231056								X		2	S853; COLLNORYF1475;	853	853	853	Geikie,A.	*	'Original entry: Uralite Gneiss'	1	Unapool._x000D_SCOTLAND._x000D_Lochinver (107)	Lochinver (107)	NC 237 322	SCOTLAND						N	223700	932200	http://www.bgs.ac.uk/data/britrocks/britrocks.cfc?method=viewSamples&sampleId=231056	http://www.largeimages.bgs.ac.uk/iip/britrocks.html?id=110000/117129	http://www.largeimages.bgs.ac.uk/iip/britrocks.html?id=110000/117128
232226								X		5	S854; S854/A; S854/B; S854/C; COLLNORYF1476;	854	854	854	Geikie,A.	*		0	Between Laxford Bridge and Loch Stack._x000D_SCOTLAND._x000D_Lochinver (107)	Lochinver (107)	NC 2 4	SCOTLAND						N	220000	940000	http://www.bgs.ac.uk/data/britrocks/britrocks.cfc?method=viewSamples&sampleId=232226	http://www.largeimages.bgs.ac.uk/iip/britrocks.html?id=110000/117131	http://www.largeimages.bgs.ac.uk/iip/britrocks.html?id=110000/117130	http://www.largeimages.bgs.ac.uk/iip/britrocks.html?id=110000/117133	http://www.largeimages.bgs.ac.uk/iip/britrocks.html?id=110000/117132	http://www.largeimages.bgs.ac.uk/iip/britrocks.html?id=110000/117135	http://www.largeimages.bgs.ac.uk/iip/britrocks.html?id=110000/117134
232227								X		2	S855; COLLNORYF1477;	855	855	855	Geikie,A.	*	'Original entry: Hornblende-Biotite Gneiss'	1	Scourie._x000D_SCOTLAND._x000D_Lochinver (107)	Lochinver (107)	NC 15 44	SCOTLAND		?same as s 849: uralite				N	215000	944000	http://www.bgs.ac.uk/data/britrocks/britrocks.cfc?method=viewSamples&sampleId=232227	http://www.largeimages.bgs.ac.uk/iip/britrocks.html?id=110000/117137	http://www.largeimages.bgs.ac.uk/iip/britrocks.html?id=110000/117136
231093								X		2	S856; COLLNORYF1478;	856	856	856	Geikie,A.	*	'Original entry: Hornblende-Biotite Gneiss'	1	Unapool._x000D_SCOTLAND._x000D_Lochinver (107)	Lochinver (107)	NC 237 322	SCOTLAND		Traces of pyroxene				N	223700	932200	http://www.bgs.ac.uk/data/britrocks/britrocks.cfc?method=viewSamples&sampleId=231093	http://www.largeimages.bgs.ac.uk/iip/britrocks.html?id=110000/117139	http://www.largeimages.bgs.ac.uk/iip/britrocks.html?id=110000/117138
231094								X		2	S857; COLLNORYF1479;	857	857	857	Geikie,A.	*	'Original entry: Hornblende Gneiss'	1	Scourie._x000D_SCOTLAND._x000D_Lochinver (107)	Lochinver (107)	NC 15 44	SCOTLAND		?uralite gneiss				N	215000	944000	http://www.bgs.ac.uk/data/britrocks/britrocks.cfc?method=viewSamples&sampleId=231094	http://www.largeimages.bgs.ac.uk/iip/britrocks.html?id=110000/117141	http://www.largeimages.bgs.ac.uk/iip/britrocks.html?id=110000/117140
292449								X		0	S858	858	858	858	Geikie,A.	*	'Original entry: Hornblende-Pyroxene Gneiss'	1	Cape Wrath._x000D_SCOTLAND._x000D_Cape Wrath (113)	Cape Wrath (113)	NC 26 74	SCOTLAND						N	226000	974000	http://www.bgs.ac.uk/data/britrocks/britrocks.cfc?method=viewSamples&sampleId=292449	http://www.largeimages.bgs.ac.uk/iip/britrocks.html?id=110000/117143	http://www.largeimages.bgs.ac.uk/iip/britrocks.html?id=110000/117142
266679								X		0	S859	859	859	859	Geikie,A.	*	'Original entry: Epidiorite'	1	Loch Gruinard._x000D_SCOTLAND._x000D_Ullapool (101)	Ullapool (101)	NG 963 918	SCOTLAND						N	196300	891800	http://www.bgs.ac.uk/data/britrocks/britrocks.cfc?method=viewSamples&sampleId=266679	http://www.largeimages.bgs.ac.uk/iip/britrocks.html?id=110000/117145	http://www.largeimages.bgs.ac.uk/iip/britrocks.html?id=110000/117144
266790								X		0	S860	860	860	860	Geikie,A.	*	'Original entry: Epidiorite'	1	Loch Gruinard._x000D_SCOTLAND._x000D_Ullapool (101)	Ullapool (101)	NG 963 918	SCOTLAND						N	196300	891800	http://www.bgs.ac.uk/data/britrocks/britrocks.cfc?method=viewSamples&sampleId=266790	http://www.largeimages.bgs.ac.uk/iip/britrocks.html?id=110000/117147	http://www.largeimages.bgs.ac.uk/iip/britrocks.html?id=110000/117146
266589								X		0	S861	861	861	861	Geikie,A.	*	'Original entry: Hornblende Rock'	1	Loch Gruinard._x000D_SCOTLAND._x000D_Ullapool (101)	Ullapool (101)	NG 963 918	SCOTLAND		With pyrite				N	196300	891800	http://www.bgs.ac.uk/data/britrocks/britrocks.cfc?method=viewSamples&sampleId=266589	http://www.largeimages.bgs.ac.uk/iip/britrocks.html?id=110000/117149	http://www.largeimages.bgs.ac.uk/iip/britrocks.html?id=110000/117148
231095								X		2	S862; COLLNORYF1480;	862	862	862	Geikie,A.	*	'Original entry: Amphibolite'	1	Scourie._x000D_SCOTLAND._x000D_Lochinver (107)	Lochinver (107)	NC 15 44	SCOTLAND		?gneiss				N	215000	944000	http://www.bgs.ac.uk/data/britrocks/britrocks.cfc?method=viewSamples&sampleId=231095	http://www.largeimages.bgs.ac.uk/iip/britrocks.html?id=110000/117151	http://www.largeimages.bgs.ac.uk/iip/britrocks.html?id=110000/117150
266590								X		0	S863	863	863	863	Geikie,A.	*	'Original entry: Pyroxene Granulite'	1	Loch Gruinard._x000D_SCOTLAND._x000D_Ullapool (101)	Ullapool (101)	NG 963 918	SCOTLAND						N	196300	891800	http://www.bgs.ac.uk/data/britrocks/britrocks.cfc?method=viewSamples&sampleId=266590	http://www.largeimages.bgs.ac.uk/iip/britrocks.html?id=110000/117153	http://www.largeimages.bgs.ac.uk/iip/britrocks.html?id=110000/117152
231096								X		2	S864; COLLNORYF1481;	864	864	864	Geikie,A.	*	'Original entry: Amphibolite'	1	Scourie._x000D_SCOTLAND._x000D_Lochinver (107)	Lochinver (107)	NC 15 44	SCOTLAND		?gneiss				N	215000	944000	http://www.bgs.ac.uk/data/britrocks/britrocks.cfc?method=viewSamples&sampleId=231096	http://www.largeimages.bgs.ac.uk/iip/britrocks.html?id=110000/117155	http://www.largeimages.bgs.ac.uk/iip/britrocks.html?id=110000/117154
266591								X		0	S865	865	865	865	Geikie,A.	*	'Original entry: Epidiorite'	1	Loch Gruinard._x000D_SCOTLAND._x000D_Ullapool (101)	Ullapool (101)	NG 963 918	SCOTLAND						N	196300	891800	http://www.bgs.ac.uk/data/britrocks/britrocks.cfc?method=viewSamples&sampleId=266591	http://www.largeimages.bgs.ac.uk/iip/britrocks.html?id=110000/117157	http://www.largeimages.bgs.ac.uk/iip/britrocks.html?id=110000/117156
276540										0	S866	866	866	866	Geikie,A.	*	'Original entry: Hornblende Gneiss'	1	Rispond._x000D_SCOTLAND._x000D_Tongue (114)	Tongue (114)	NC 45 65	SCOTLAND						N	245000	965000	http://www.bgs.ac.uk/data/britrocks/britrocks.cfc?method=viewSamples&sampleId=276540	http://www.largeimages.bgs.ac.uk/iip/britrocks.html?id=110000/117159	http://www.largeimages.bgs.ac.uk/iip/britrocks.html?id=110000/117158
276541										0	S867	867	867	867	Geikie,A.	*	'Original entry: Hornblende Gneiss'	1	Rispond._x000D_SCOTLAND._x000D_Tongue (114)	Tongue (114)	NC 45 65	SCOTLAND						N	245000	965000	http://www.bgs.ac.uk/data/britrocks/britrocks.cfc?method=viewSamples&sampleId=276541	http://www.largeimages.bgs.ac.uk/iip/britrocks.html?id=110000/117161	http://www.largeimages.bgs.ac.uk/iip/britrocks.html?id=110000/117160
231097								X		2	S868; COLLNORYF1482;	868	868	868	Geikie,A.	*	'Original entry: Granite'	1	Loch Stack._x000D_SCOTLAND._x000D_Lochinver (107)	Lochinver (107)	NC 29 42	SCOTLAND						N	229000	942000	http://www.bgs.ac.uk/data/britrocks/britrocks.cfc?method=viewSamples&sampleId=231097	http://www.largeimages.bgs.ac.uk/iip/britrocks.html?id=110000/117163	http://www.largeimages.bgs.ac.uk/iip/britrocks.html?id=110000/117162
231098								X		2	S869; COLLNORYF1483;	869	869	869	Geikie,A.	*	'Original entry: Biotite Gneiss'	1	Loch Stack._x000D_SCOTLAND._x000D_Lochinver (107)	Lochinver (107)	NC 29 42	SCOTLAND						N	229000	942000	http://www.bgs.ac.uk/data/britrocks/britrocks.cfc?method=viewSamples&sampleId=231098	http://www.largeimages.bgs.ac.uk/iip/britrocks.html?id=110000/117165	http://www.largeimages.bgs.ac.uk/iip/britrocks.html?id=110000/117164
266592								X		0	S870	870	870	870	Geikie,A.	*	'Original entry: Gneiss (Granitic)'	1	Loch Gruinard._x000D_SCOTLAND._x000D_Ullapool (101)	Ullapool (101)	NG 963 918	SCOTLAND						N	196300	891800	http://www.bgs.ac.uk/data/britrocks/britrocks.cfc?method=viewSamples&sampleId=266592	http://www.largeimages.bgs.ac.uk/iip/britrocks.html?id=110000/117167	http://www.largeimages.bgs.ac.uk/iip/britrocks.html?id=110000/117166
231099								X		2	S871; COLLNORYF1484;	871	871	871	Geikie,A.	*	'Original entry: Granite'	1	Near Loch Stack._x000D_SCOTLAND._x000D_Lochinver (107)	Lochinver (107)	NC 29 42	SCOTLAND		?orthite				N	229000	942000	http://www.bgs.ac.uk/data/britrocks/britrocks.cfc?method=viewSamples&sampleId=231099	http://www.largeimages.bgs.ac.uk/iip/britrocks.html?id=110000/117169	http://www.largeimages.bgs.ac.uk/iip/britrocks.html?id=110000/117168
292450								X		0	S872	872	872	872	Geikie,A.	*	'Original entry: Chert'	1	Near Cape Wrath._x000D_SCOTLAND._x000D_Cape Wrath (113)	Cape Wrath (113)	NC 251 735	SCOTLAND						N	225100	973500	http://www.bgs.ac.uk/data/britrocks/britrocks.cfc?method=viewSamples&sampleId=292450	http://www.largeimages.bgs.ac.uk/iip/britrocks.html?id=110000/117171	http://www.largeimages.bgs.ac.uk/iip/britrocks.html?id=110000/117170
292451								X		0	S873	873	873	873	Geikie,A.	*		0	Cape Wrath._x000D_SCOTLAND._x000D_Cape Wrath (113)	Cape Wrath (113)	NC 26 74	SCOTLAND						N	226000	974000	http://www.bgs.ac.uk/data/britrocks/britrocks.cfc?method=viewSamples&sampleId=292451	http://www.largeimages.bgs.ac.uk/iip/britrocks.html?id=110000/117173	http://www.largeimages.bgs.ac.uk/iip/britrocks.html?id=110000/117172
292452								X		0	S874	874	874	874	Geikie,A.	*	'Original entry: Quartz-Feldspar Rock'	1	Cape Wrath._x000D_SCOTLAND._x000D_Cape Wrath (113)	Cape Wrath (113)	NC 26 74	SCOTLAND		Binary granite				N	226000	974000	http://www.bgs.ac.uk/data/britrocks/britrocks.cfc?method=viewSamples&sampleId=292452	http://www.largeimages.bgs.ac.uk/iip/britrocks.html?id=110000/117175	http://www.largeimages.bgs.ac.uk/iip/britrocks.html?id=110000/117174
292453								X		0	S875	875	875	875	Geikie,A.	*	'Original entry: Quartz-Feldspar Rock'	1	Cape Wrath._x000D_SCOTLAND._x000D_Cape Wrath (113)	Cape Wrath (113)	NC 26 74	SCOTLAND		Binary granite				N	226000	974000	http://www.bgs.ac.uk/data/britrocks/britrocks.cfc?method=viewSamples&sampleId=292453	http://www.largeimages.bgs.ac.uk/iip/britrocks.html?id=110000/117177	http://www.largeimages.bgs.ac.uk/iip/britrocks.html?id=110000/117176
270864										0	S876	876	876	876	Geikie,A.	*	'Original entry: Quartz-Feldspar Grit'	1	Shore of Loch Gruinard._x000D_SCOTLAND._x000D_Inverbroom (92)	Inverbroom (92)		SCOTLAND		Torridon sandstone				N			http://www.bgs.ac.uk/data/britrocks/britrocks.cfc?method=viewSamples&sampleId=270864	http://www.largeimages.bgs.ac.uk/iip/britrocks.html?id=110000/117179	http://www.largeimages.bgs.ac.uk/iip/britrocks.html?id=110000/117178
270865										0	S877	877	877	877	Geikie,A.	*	'Original entry: Grit'	1	SW shore of Little Loch Broom._x000D_SCOTLAND._x000D_Inverbroom (92)	Inverbroom (92)		SCOTLAND		Torridon sandstone				N			http://www.bgs.ac.uk/data/britrocks/britrocks.cfc?method=viewSamples&sampleId=270865	http://www.largeimages.bgs.ac.uk/iip/britrocks.html?id=110000/117181	http://www.largeimages.bgs.ac.uk/iip/britrocks.html?id=110000/117180
231100								X		2	S878; COLLNORYF1485;	878	878	878	Geikie,A.	*	'Original entry: Quartz-Feldspar Grit'	1	Isle of Handa._x000D_SCOTLAND._x000D_Lochinver (107)	Lochinver (107)	NC 1 4	SCOTLAND						N	210000	940000	http://www.bgs.ac.uk/data/britrocks/britrocks.cfc?method=viewSamples&sampleId=231100	http://www.largeimages.bgs.ac.uk/iip/britrocks.html?id=110000/117183	http://www.largeimages.bgs.ac.uk/iip/britrocks.html?id=110000/117182
231101								X		2	S879; COLLNORYF1486;	879	879	879	Geikie,A.	*	'Original entry: Quartz-Feldspar Grit'	1	Isle of Handa._x000D_SCOTLAND._x000D_Lochinver (107)	Lochinver (107)	NC 1 4	SCOTLAND						N	210000	940000	http://www.bgs.ac.uk/data/britrocks/britrocks.cfc?method=viewSamples&sampleId=231101	http://www.largeimages.bgs.ac.uk/iip/britrocks.html?id=110000/117185	http://www.largeimages.bgs.ac.uk/iip/britrocks.html?id=110000/117184
270866										0	S880; S880/A; S880/B;	880	880	880	Geikie,A.	*	'Original entry: Chloritic Grit'	1	Fisherfield, Little Loch Gruinard._x000D_SCOTLAND._x000D_Inverbroom (92)	Inverbroom (92)		SCOTLAND		Torridon sandstone; two slides, pebble?				N			http://www.bgs.ac.uk/data/britrocks/britrocks.cfc?method=viewSamples&sampleId=270866	http://www.largeimages.bgs.ac.uk/iip/britrocks.html?id=110000/117187	http://www.largeimages.bgs.ac.uk/iip/britrocks.html?id=110000/117186	http://www.largeimages.bgs.ac.uk/iip/britrocks.html?id=110000/117189	http://www.largeimages.bgs.ac.uk/iip/britrocks.html?id=110000/117188
270867										0	S881	881	881	881	Geikie,A.	*	'Original entry: Chloritic Grit'	1	Fisherfield, Little Loch Gruinard._x000D_SCOTLAND._x000D_Inverbroom (92)	Inverbroom (92)		SCOTLAND		Torridon sandstone; x epidote, orthite				N			http://www.bgs.ac.uk/data/britrocks/britrocks.cfc?method=viewSamples&sampleId=270867	http://www.largeimages.bgs.ac.uk/iip/britrocks.html?id=110000/117191	http://www.largeimages.bgs.ac.uk/iip/britrocks.html?id=110000/117190
275646										0	S882	882	882	882	Geikie,A.	*	'Original entry: Conglomerate'	1	Stonehaven._x000D_SCOTLAND._x000D_Stonehaven (67)	Stonehaven (67)	NO 88 86	SCOTLAND		Matrix of o r conglomerate				N	388000	786000	http://www.bgs.ac.uk/data/britrocks/britrocks.cfc?method=viewSamples&sampleId=275646	http://www.largeimages.bgs.ac.uk/iip/britrocks.html?id=110000/117193	http://www.largeimages.bgs.ac.uk/iip/britrocks.html?id=110000/117192
270868										0	S883	883	883	883	Geikie,A.	*	'Original entry: Chloritic Grit'	1	SW shore of Little Loch Broom._x000D_SCOTLAND._x000D_Inverbroom (92)	Inverbroom (92)		SCOTLAND		Torridon sandstone				N			http://www.bgs.ac.uk/data/britrocks/britrocks.cfc?method=viewSamples&sampleId=270868	http://www.largeimages.bgs.ac.uk/iip/britrocks.html?id=110000/117195	http://www.largeimages.bgs.ac.uk/iip/britrocks.html?id=110000/117194
276432										0	S884	884	884	884	Geikie,A.	*	'Original entry: Limestone'	1	Durness._x000D_SCOTLAND._x000D_Tongue (114)	Tongue (114)	NC 40 68	SCOTLAND		From the block with fossils				N	240000	968000	http://www.bgs.ac.uk/data/britrocks/britrocks.cfc?method=viewSamples&sampleId=276432	http://www.largeimages.bgs.ac.uk/iip/britrocks.html?id=110000/117197	http://www.largeimages.bgs.ac.uk/iip/britrocks.html?id=110000/117196
270869										0	S885	885	885	885	Geikie,A.	*	'Original entry: Crystaline Limestone'	1	Glen Cruachalie or Grudie, Loch Maree._x000D_SCOTLAND._x000D_Inverbroom (92)	Inverbroom (92)	NG 979 627	SCOTLAND						N	197900	862700	http://www.bgs.ac.uk/data/britrocks/britrocks.cfc?method=viewSamples&sampleId=270869	http://www.largeimages.bgs.ac.uk/iip/britrocks.html?id=110000/117199	http://www.largeimages.bgs.ac.uk/iip/britrocks.html?id=110000/117198
231102								X		2	S886; COLLNORYF1487;	886	886	886	Geikie,A.	*	'Original entry: Limestone'	1	Inchnadamph._x000D_SCOTLAND._x000D_Lochinver (107)	Lochinver (107)	NC 25 22	SCOTLAND		Durness limestone				N	225000	922000	http://www.bgs.ac.uk/data/britrocks/britrocks.cfc?method=viewSamples&sampleId=231102	http://www.largeimages.bgs.ac.uk/iip/britrocks.html?id=110000/117201	http://www.largeimages.bgs.ac.uk/iip/britrocks.html?id=110000/117200
231103								X		2	S887; COLLNORYF1488;	887	887	887	Geikie,A.	*	'Original entry: Limestone'	1	Above Inchnadamph._x000D_SCOTLAND._x000D_Lochinver (107)	Lochinver (107)	NC 26 21	SCOTLAND		Durness limestone (crystalline)				N	226000	921000	http://www.bgs.ac.uk/data/britrocks/britrocks.cfc?method=viewSamples&sampleId=231103	http://www.largeimages.bgs.ac.uk/iip/britrocks.html?id=110000/117203	http://www.largeimages.bgs.ac.uk/iip/britrocks.html?id=110000/117202
231104								X		2	S888; COLLNORYF1489;	888	888	888	Geikie,A.	*	'Original entry: Limestone'	1	Above Inchnadamph._x000D_SCOTLAND._x000D_Lochinver (107)	Lochinver (107)	NC 26 21	SCOTLAND		Durness limestone				N	226000	921000	http://www.bgs.ac.uk/data/britrocks/britrocks.cfc?method=viewSamples&sampleId=231104	http://www.largeimages.bgs.ac.uk/iip/britrocks.html?id=110000/117205	http://www.largeimages.bgs.ac.uk/iip/britrocks.html?id=110000/117204
266593								X		0	S889	889	889	889	Geikie,A.	*	'Original entry: Sandy Limestone'	1	Ullapool._x000D_SCOTLAND._x000D_Ullapool (101)	Ullapool (101)	NH 134 945	SCOTLAND						N	213400	894500	http://www.bgs.ac.uk/data/britrocks/britrocks.cfc?method=viewSamples&sampleId=266593	http://www.largeimages.bgs.ac.uk/iip/britrocks.html?id=110000/117207	http://www.largeimages.bgs.ac.uk/iip/britrocks.html?id=110000/117206
231105								X		2	S890; COLLNORYF1490;	890	890	890	Geikie,A.	*	'Original entry: Limestone'	1	Above Inchnadamph._x000D_SCOTLAND._x000D_Lochinver (107)	Lochinver (107)	NC 26 21	SCOTLAND		Durness limestone, quartzose				N	226000	921000	http://www.bgs.ac.uk/data/britrocks/britrocks.cfc?method=viewSamples&sampleId=231105	http://www.largeimages.bgs.ac.uk/iip/britrocks.html?id=110000/117209	http://www.largeimages.bgs.ac.uk/iip/britrocks.html?id=110000/117208
259926										0	S891	891	891	891	Geikie,A.	*	'Original entry: Crystalline Limestone'	1	Polmaily, Glen Urquhart._x000D_SCOTLAND._x000D_Fort Augustus (73)	Fort Augustus (73)	NH 485 314	SCOTLAND		With biotite and tremolite				N	248500	831400	http://www.bgs.ac.uk/data/britrocks/britrocks.cfc?method=viewSamples&sampleId=259926	http://www.largeimages.bgs.ac.uk/iip/britrocks.html?id=110000/117211	http://www.largeimages.bgs.ac.uk/iip/britrocks.html?id=110000/117210
269400										0	S892	892	892	892	Geikie,A.	*	'Original entry: Limestone'	1	Rebeg, 4 miles SE of Beauly._x000D_SCOTLAND._x000D_Inverness (83)	Inverness (83)	NH 563 422	SCOTLAND		Mica present				N	256300	842200	http://www.bgs.ac.uk/data/britrocks/britrocks.cfc?method=viewSamples&sampleId=269400	http://www.largeimages.bgs.ac.uk/iip/britrocks.html?id=110000/117213	http://www.largeimages.bgs.ac.uk/iip/britrocks.html?id=110000/117212
259927										0	S893	893	893	893	Geikie,A.	*	'Original entry: Crystalline Limestone'	1	Polmaily, Glen Urquhart._x000D_SCOTLAND._x000D_Fort Augustus (73)	Fort Augustus (73)	NH 485 314	SCOTLAND		Mica present				N	248500	831400	http://www.bgs.ac.uk/data/britrocks/britrocks.cfc?method=viewSamples&sampleId=259927	http://www.largeimages.bgs.ac.uk/iip/britrocks.html?id=110000/117215	http://www.largeimages.bgs.ac.uk/iip/britrocks.html?id=110000/117214
266594								X		0	S894	894	894	894	Geikie,A.	*	'Original entry: Crystalline Limestone'	1	10 miles N of Ullapool on Assynt road._x000D_SCOTLAND._x000D_Ullapool (101)	Ullapool (101)	NC 186 087	SCOTLAND						N	218600	908700	http://www.bgs.ac.uk/data/britrocks/britrocks.cfc?method=viewSamples&sampleId=266594	http://www.largeimages.bgs.ac.uk/iip/britrocks.html?id=110000/117217	http://www.largeimages.bgs.ac.uk/iip/britrocks.html?id=110000/117216
266595								X		0	S895	895	895	895	Geikie,A.	*	'Original entry: Limestone'	1	10 miles N of Ullapool on Assynt road._x000D_SCOTLAND._x000D_Ullapool (101)	Ullapool (101)	NC 186 087	SCOTLAND						N	218600	908700	http://www.bgs.ac.uk/data/britrocks/britrocks.cfc?method=viewSamples&sampleId=266595	http://www.largeimages.bgs.ac.uk/iip/britrocks.html?id=110000/117219	http://www.largeimages.bgs.ac.uk/iip/britrocks.html?id=110000/117218
259928										0	S896	896	896	896	Geikie,A.	*	'Original entry: Limestone'	1	Above Polmaily, Glen Urquhart._x000D_SCOTLAND._x000D_Fort Augustus (73)	Fort Augustus (73)	NH 485 314	SCOTLAND						N	248500	831400	http://www.bgs.ac.uk/data/britrocks/britrocks.cfc?method=viewSamples&sampleId=259928	http://www.largeimages.bgs.ac.uk/iip/britrocks.html?id=110000/117221	http://www.largeimages.bgs.ac.uk/iip/britrocks.html?id=110000/117220
259929										0	S897	897	897	897	Geikie,A.	*	'Original entry: Limestone'	1	Polmaily, Glen Urquhart._x000D_SCOTLAND._x000D_Fort Augustus (73)	Fort Augustus (73)	NH 485 314	SCOTLAND						N	248500	831400	http://www.bgs.ac.uk/data/britrocks/britrocks.cfc?method=viewSamples&sampleId=259929	http://www.largeimages.bgs.ac.uk/iip/britrocks.html?id=110000/117223	http://www.largeimages.bgs.ac.uk/iip/britrocks.html?id=110000/117222
275647										0	S898	898	898	898	Geikie,A.	*	'Original entry: Gneissose Grit'	1	Shore between Muchalls and Stonehaven._x000D_SCOTLAND._x000D_Stonehaven (67)	Stonehaven (67)	NO 9 9	SCOTLAND						N	390000	790000	http://www.bgs.ac.uk/data/britrocks/britrocks.cfc?method=viewSamples&sampleId=275647	http://www.largeimages.bgs.ac.uk/iip/britrocks.html?id=110000/117225	http://www.largeimages.bgs.ac.uk/iip/britrocks.html?id=110000/117224
285262										0	S899	899	899	899	Geikie,A.	*	'Original entry: Brecciated Quartzite'	1	Glen Orchil, Boat of Bog, Speyside NE of Elgin._x000D_SCOTLAND._x000D_Elgin (95)	Elgin (95)	NJ 342 604	SCOTLAND						N	334200	860400	http://www.bgs.ac.uk/data/britrocks/britrocks.cfc?method=viewSamples&sampleId=285262	http://www.largeimages.bgs.ac.uk/iip/britrocks.html?id=110000/117227	http://www.largeimages.bgs.ac.uk/iip/britrocks.html?id=110000/117226
275648										0	S900	900	900	900	Geikie,A.	*	'Original entry: Gneissose Grit'	1	Coast N of Stonehaven._x000D_SCOTLAND._x000D_Stonehaven (67)	Stonehaven (67)	NO 9 9	SCOTLAND						N	390000	790000	http://www.bgs.ac.uk/data/britrocks/britrocks.cfc?method=viewSamples&sampleId=275648	http://www.largeimages.bgs.ac.uk/iip/britrocks.html?id=110000/117229	http://www.largeimages.bgs.ac.uk/iip/britrocks.html?id=110000/117228
275649										0	S901	901	901	901	Geikie,A.	*	'Original entry: Altered Grit'	1	Shore N of Stonehaven._x000D_SCOTLAND._x000D_Stonehaven (67)	Stonehaven (67)	NO 89 89	SCOTLAND		Schistose probbaly greywacke				N	389000	789000	http://www.bgs.ac.uk/data/britrocks/britrocks.cfc?method=viewSamples&sampleId=275649	http://www.largeimages.bgs.ac.uk/iip/britrocks.html?id=110000/117231	http://www.largeimages.bgs.ac.uk/iip/britrocks.html?id=110000/117230
275651										0	S903	903	903	903	Geikie,A.	*	'Original entry: Grit'	1	Shore N of Stonehaven._x000D_SCOTLAND._x000D_Stonehaven (67)	Stonehaven (67)	NO 89 89	SCOTLAND		Schistose probbaly greywacke				N	389000	789000	http://www.bgs.ac.uk/data/britrocks/britrocks.cfc?method=viewSamples&sampleId=275651	http://www.largeimages.bgs.ac.uk/iip/britrocks.html?id=110000/117235	http://www.largeimages.bgs.ac.uk/iip/britrocks.html?id=110000/117234
292068										0	S904	904	904	904	Geikie,A.	*	'Original entry: Biotite Gneiss'	1	Shore Rosehearty._x000D_SCOTLAND._x000D_Fraserburgh (97)	Fraserburgh (97)	NJ 930 679	SCOTLAND		"pebbly grit"				N	393000	867900	http://www.bgs.ac.uk/data/britrocks/britrocks.cfc?method=viewSamples&sampleId=292068	http://www.largeimages.bgs.ac.uk/iip/britrocks.html?id=110000/117237	http://www.largeimages.bgs.ac.uk/iip/britrocks.html?id=110000/117236
266596								X		0	S905	905	905	905	Geikie,A.	*	'Original entry: Quartz-Feldspar Grit'	1	Above limestone, Ullapool._x000D_SCOTLAND._x000D_Ullapool (101)	Ullapool (101)	NH 135 945	SCOTLAND		Traces of cataclastic structure				N	213500	894500	http://www.bgs.ac.uk/data/britrocks/britrocks.cfc?method=viewSamples&sampleId=266596	http://www.largeimages.bgs.ac.uk/iip/britrocks.html?id=110000/117239	http://www.largeimages.bgs.ac.uk/iip/britrocks.html?id=110000/117238
292069										0	S906	906	906	906	Geikie,A.	*	'Original entry: Biotite Gneiss?'	1	Shore Rosehearty._x000D_SCOTLAND._x000D_Fraserburgh (97)	Fraserburgh (97)	NJ 930 679	SCOTLAND		Pebbles of quartz				N	393000	867900	http://www.bgs.ac.uk/data/britrocks/britrocks.cfc?method=viewSamples&sampleId=292069	http://www.largeimages.bgs.ac.uk/iip/britrocks.html?id=110000/117241	http://www.largeimages.bgs.ac.uk/iip/britrocks.html?id=110000/117240
292070										0	S907	907	907	907	Geikie,A.	*	'Original entry: Biotite Gneiss?'	1	Old harbour, Rosehearty._x000D_SCOTLAND._x000D_Fraserburgh (97)	Fraserburgh (97)	NJ 931 678	SCOTLAND		Gneissose grit				N	393100	867800	http://www.bgs.ac.uk/data/britrocks/britrocks.cfc?method=viewSamples&sampleId=292070	http://www.largeimages.bgs.ac.uk/iip/britrocks.html?id=110000/117243	http://www.largeimages.bgs.ac.uk/iip/britrocks.html?id=110000/117242
292071										0	S908	908	908	908	Geikie,A.	*	'Original entry: Biotite Gneiss'	1	Shore Rosehearty._x000D_SCOTLAND._x000D_Fraserburgh (97)	Fraserburgh (97)	NJ 930 679	SCOTLAND		Gneissose grit				N	393000	867900	http://www.bgs.ac.uk/data/britrocks/britrocks.cfc?method=viewSamples&sampleId=292071	http://www.largeimages.bgs.ac.uk/iip/britrocks.html?id=110000/117245	http://www.largeimages.bgs.ac.uk/iip/britrocks.html?id=110000/117244
292072										0	S909	909	909	909	Geikie,A.	*	'Original entry: Pebbly Biotite Gneiss'	1	Shore Rosehearty._x000D_SCOTLAND._x000D_Fraserburgh (97)	Fraserburgh (97)	NJ 930 679	SCOTLAND		Gneissose grit				N	393000	867900	http://www.bgs.ac.uk/data/britrocks/britrocks.cfc?method=viewSamples&sampleId=292072	http://www.largeimages.bgs.ac.uk/iip/britrocks.html?id=110000/117247	http://www.largeimages.bgs.ac.uk/iip/britrocks.html?id=110000/117246
266597								X		0	S910	910	910	910	Geikie,A.	*	'Original entry: Quartzite'	1	Ullapool._x000D_SCOTLAND._x000D_Ullapool (101)	Ullapool (101)	NH 132 945	SCOTLAND						N	213200	894500	http://www.bgs.ac.uk/data/britrocks/britrocks.cfc?method=viewSamples&sampleId=266597	http://www.largeimages.bgs.ac.uk/iip/britrocks.html?id=110000/117249	http://www.largeimages.bgs.ac.uk/iip/britrocks.html?id=110000/117248
271173										0	S911	911	911	911	Geikie,A.	*	'Original entry: Quartzite'	1	Glen Cruachalie or Grudie, Loch Maree._x000D_SCOTLAND._x000D_Inverbroom (92)	Inverbroom (92)	NG 97 65	SCOTLAND		Traces of cataclastic structure				N	197000	865000	http://www.bgs.ac.uk/data/britrocks/britrocks.cfc?method=viewSamples&sampleId=271173	http://www.largeimages.bgs.ac.uk/iip/britrocks.html?id=110000/117251	http://www.largeimages.bgs.ac.uk/iip/britrocks.html?id=110000/117250
234887										0	S912	912	912	912	Geikie,A.	*		0	Overscaig, Loch Shin._x000D_SCOTLAND._x000D_Altnaharra (108)	Altnaharra (108)	NC 41 23	SCOTLAND		Quartz. moine, biotite schist				N	241000	923000	http://www.bgs.ac.uk/data/britrocks/britrocks.cfc?method=viewSamples&sampleId=234887	http://www.largeimages.bgs.ac.uk/iip/britrocks.html?id=110000/117253	http://www.largeimages.bgs.ac.uk/iip/britrocks.html?id=110000/117252
265998										0	S913	913	913	913	Geikie,A.	*	'Original entry: Quartz Rock'	1	Meall a'Chaoruinn, Achnasheen: N part of ridge._x000D_SCOTLAND._x000D_Lochcarron (82)	Lochcarron (82)	NH 124 610	SCOTLAND		N. part of ridge				N	212400	861000	http://www.bgs.ac.uk/data/britrocks/britrocks.cfc?method=viewSamples&sampleId=265998	http://www.largeimages.bgs.ac.uk/iip/britrocks.html?id=110000/117255	http://www.largeimages.bgs.ac.uk/iip/britrocks.html?id=110000/117254
234087										0	S914	914	914	914	Geikie,A.	*		0	W of Fiodhaig Bridge, Loch Shin._x000D_SCOTLAND._x000D_Altnaharra (108)	Altnaharra (108)	NC 467 204	SCOTLAND		Two mica gneiss, with epidote. moine,				N	246700	920400	http://www.bgs.ac.uk/data/britrocks/britrocks.cfc?method=viewSamples&sampleId=234087	http://www.largeimages.bgs.ac.uk/iip/britrocks.html?id=110000/117257	http://www.largeimages.bgs.ac.uk/iip/britrocks.html?id=110000/117256
234888										0	S915	915	915	915	Geikie,A.	*		0	Overscaig, Loch Shin._x000D_SCOTLAND._x000D_Altnaharra (108)	Altnaharra (108)	NC 41 23	SCOTLAND		Biotite schist, moine				N	241000	923000	http://www.bgs.ac.uk/data/britrocks/britrocks.cfc?method=viewSamples&sampleId=234888	http://www.largeimages.bgs.ac.uk/iip/britrocks.html?id=110000/117259	http://www.largeimages.bgs.ac.uk/iip/britrocks.html?id=110000/117258
292073										0	S916	916	916	916	Geikie,A.	*	'Original entry: Fine Biotite Gneiss'	1	0.5 mile E of Rosehearty._x000D_SCOTLAND._x000D_Fraserburgh (97)	Fraserburgh (97)	NJ 943 677	SCOTLAND		"grey quartzite" or "grit"				N	394300	867700	http://www.bgs.ac.uk/data/britrocks/britrocks.cfc?method=viewSamples&sampleId=292073	http://www.largeimages.bgs.ac.uk/iip/britrocks.html?id=110000/117261	http://www.largeimages.bgs.ac.uk/iip/britrocks.html?id=110000/117260
271174										0	S917	917	917	917	Geikie,A.	*	'Original entry: Epidotic Quartz Schist'	1	Dundonald Glen._x000D_SCOTLAND._x000D_Inverbroom (92)	Inverbroom (92)		SCOTLAND		?mylonite				N			http://www.bgs.ac.uk/data/britrocks/britrocks.cfc?method=viewSamples&sampleId=271174	http://www.largeimages.bgs.ac.uk/iip/britrocks.html?id=110000/117263	http://www.largeimages.bgs.ac.uk/iip/britrocks.html?id=110000/117262
292074										0	S918	918	918	918	Geikie,A.	*	'Original entry: Biotite And Actinolite'	1	Shore W of Fraserburgh._x000D_SCOTLAND._x000D_Fraserburgh (97)	Fraserburgh (97)	NJ 985 674	SCOTLAND		Well-stratified dark quartzite				N	398500	867400	http://www.bgs.ac.uk/data/britrocks/britrocks.cfc?method=viewSamples&sampleId=292074	http://www.largeimages.bgs.ac.uk/iip/britrocks.html?id=110000/117265	http://www.largeimages.bgs.ac.uk/iip/britrocks.html?id=110000/117264
271175										0	S919	919	919	919	Geikie,A.	*	'Original entry: Mica Schist'	1	14th milestone from Ullapool to Garve._x000D_SCOTLAND._x000D_Inverbroom (92)	Inverbroom (92)	NH 238 758	SCOTLAND		Two micas				N	223800	875800	http://www.bgs.ac.uk/data/britrocks/britrocks.cfc?method=viewSamples&sampleId=271175	http://www.largeimages.bgs.ac.uk/iip/britrocks.html?id=110000/117267	http://www.largeimages.bgs.ac.uk/iip/britrocks.html?id=110000/117266
276433										0	S920; S920/A; S920/B;	920	920	920	Geikie,A.	*	'Original entry: Mylonite'	1	N end of Loch Hope._x000D_SCOTLAND._x000D_Tongue (114)	Tongue (114)	NC 47 59	SCOTLAND						N	247000	959000	http://www.bgs.ac.uk/data/britrocks/britrocks.cfc?method=viewSamples&sampleId=276433	http://www.largeimages.bgs.ac.uk/iip/britrocks.html?id=110000/117269	http://www.largeimages.bgs.ac.uk/iip/britrocks.html?id=110000/117268	http://www.largeimages.bgs.ac.uk/iip/britrocks.html?id=110000/117271	http://www.largeimages.bgs.ac.uk/iip/britrocks.html?id=110000/117270
285120										0	S921	921	921	921	Geikie,A.	*	'Original entry: Schistose Grit'	1	Railway cutting, Mulben, Speyside._x000D_SCOTLAND._x000D_Rothes (85)	Rothes (85)	NJ 346 515	SCOTLAND		Striped red and grey, fine-grained; mem. sh. 85, p. 48				N	334600	851500	http://www.bgs.ac.uk/data/britrocks/britrocks.cfc?method=viewSamples&sampleId=285120	http://www.largeimages.bgs.ac.uk/iip/britrocks.html?id=110000/117273	http://www.largeimages.bgs.ac.uk/iip/britrocks.html?id=110000/117272
265999										0	S922	922	922	922	Geikie,A.	*	'Original entry: Biotite Gneiss'	1	S face of Meall a'Chaoruinn, Achnasheen._x000D_SCOTLAND._x000D_Lochcarron (82)	Lochcarron (82)	NH 135 601	SCOTLAND		Schistose quartz rock				N	213500	860100	http://www.bgs.ac.uk/data/britrocks/britrocks.cfc?method=viewSamples&sampleId=265999	http://www.largeimages.bgs.ac.uk/iip/britrocks.html?id=110000/117275	http://www.largeimages.bgs.ac.uk/iip/britrocks.html?id=110000/117274
276434										0	S923	923	923	923	Geikie,A.	*	'Original entry: Mica Schist'	1	Balnakiel, Durness._x000D_SCOTLAND._x000D_Tongue (114)	Tongue (114)	NC 405 695	SCOTLAND		Epidotic moine type				N	240500	969500	http://www.bgs.ac.uk/data/britrocks/britrocks.cfc?method=viewSamples&sampleId=276434	http://www.largeimages.bgs.ac.uk/iip/britrocks.html?id=110000/117277	http://www.largeimages.bgs.ac.uk/iip/britrocks.html?id=110000/117276
271176										0	S924	924	924	924	Geikie,A.	*	'Original entry: Mica Schist'	1	Loch Droma, Ullapool to Garve._x000D_SCOTLAND._x000D_Inverbroom (92)	Inverbroom (92)	NH 259 754	SCOTLAND		Two micas				N	225900	875400	http://www.bgs.ac.uk/data/britrocks/britrocks.cfc?method=viewSamples&sampleId=271176	http://www.largeimages.bgs.ac.uk/iip/britrocks.html?id=110000/117279	http://www.largeimages.bgs.ac.uk/iip/britrocks.html?id=110000/117278
234889										0	S925	925	925	925	Geikie,A.	*		0	Overscaig, Loch Shin._x000D_SCOTLAND._x000D_Altnaharra (108)	Altnaharra (108)	NC 41 23	SCOTLAND		Biotite gneiss, with epidote and sphene. moine				N	241000	923000	http://www.bgs.ac.uk/data/britrocks/britrocks.cfc?method=viewSamples&sampleId=234889	http://www.largeimages.bgs.ac.uk/iip/britrocks.html?id=110000/117281	http://www.largeimages.bgs.ac.uk/iip/britrocks.html?id=110000/117280
270829										0	S926	926	926	926	Geikie,A.	*	'Original entry: Mica Schist'	1	Loch Droma, Ullapool to Garve._x000D_SCOTLAND._x000D_Inverbroom (92)	Inverbroom (92)	NH 259 754	SCOTLAND		Two micas				N	225900	875400	http://www.bgs.ac.uk/data/britrocks/britrocks.cfc?method=viewSamples&sampleId=270829	http://www.largeimages.bgs.ac.uk/iip/britrocks.html?id=110000/117283	http://www.largeimages.bgs.ac.uk/iip/britrocks.html?id=110000/117282
270830										0	S927	927	927	927	Geikie,A.	*	'Original entry: Mica Schist'	1	Dundonald Glen._x000D_SCOTLAND._x000D_Inverbroom (92)	Inverbroom (92)		SCOTLAND		Two micas				N			http://www.bgs.ac.uk/data/britrocks/britrocks.cfc?method=viewSamples&sampleId=270830	http://www.largeimages.bgs.ac.uk/iip/britrocks.html?id=110000/117285	http://www.largeimages.bgs.ac.uk/iip/britrocks.html?id=110000/117284
270831										0	S928	928	928	928	Geikie,A.	*	'Original entry: Epidotic Mica Schist'	1	Dundonald Glen._x000D_SCOTLAND._x000D_Inverbroom (92)	Inverbroom (92)		SCOTLAND		?mylonite				N			http://www.bgs.ac.uk/data/britrocks/britrocks.cfc?method=viewSamples&sampleId=270831	http://www.largeimages.bgs.ac.uk/iip/britrocks.html?id=110000/117287	http://www.largeimages.bgs.ac.uk/iip/britrocks.html?id=110000/117286
270832										0	S929	929	929	929	Geikie,A.	*	'Original entry: Mica Schist'	1	Between 14th and 15th milestones from Ullapool to Garve._x000D_SCOTLAND._x000D_Inverbroom (92)	Inverbroom (92)	NH 25 75	SCOTLAND		Two micas and garnet				N	225000	875000	http://www.bgs.ac.uk/data/britrocks/britrocks.cfc?method=viewSamples&sampleId=270832	http://www.largeimages.bgs.ac.uk/iip/britrocks.html?id=110000/117289	http://www.largeimages.bgs.ac.uk/iip/britrocks.html?id=110000/117288
270833										0	S930	930	930	930	Geikie,A.	*	'Original entry: Mica Schist'	1	12th milestone SW of Ullapool._x000D_SCOTLAND._x000D_Inverbroom (92)	Inverbroom (92)	NH 213 776	SCOTLAND		Two micas and garnet				N	221300	877600	http://www.bgs.ac.uk/data/britrocks/britrocks.cfc?method=viewSamples&sampleId=270833	http://www.largeimages.bgs.ac.uk/iip/britrocks.html?id=110000/117291	http://www.largeimages.bgs.ac.uk/iip/britrocks.html?id=110000/117290
270834										0	S931	931	931	931	Geikie,A.	*	'Original entry: Mica Schist'	1	Dundonald Glen._x000D_SCOTLAND._x000D_Inverbroom (92)	Inverbroom (92)		SCOTLAND		Two micas and garnet				N			http://www.bgs.ac.uk/data/britrocks/britrocks.cfc?method=viewSamples&sampleId=270834	http://www.largeimages.bgs.ac.uk/iip/britrocks.html?id=110000/117293	http://www.largeimages.bgs.ac.uk/iip/britrocks.html?id=110000/117292
270835										0	S932	932	932	932	Geikie,A.	*	'Original entry: Mica Schist'	1	Ullapool road to Garve, near Loch Droma._x000D_SCOTLAND._x000D_Inverbroom (92)	Inverbroom (92)	NH 25 75	SCOTLAND		Two micas and garnet				N	225000	875000	http://www.bgs.ac.uk/data/britrocks/britrocks.cfc?method=viewSamples&sampleId=270835	http://www.largeimages.bgs.ac.uk/iip/britrocks.html?id=110000/117295	http://www.largeimages.bgs.ac.uk/iip/britrocks.html?id=110000/117294
18036										0	S933	933	933	933	Geikie,A.	*	'Original entry: Biotite Schist'	1	Railway cutting, Mulben, Speyside._x000D_SCOTLAND._x000D_Rothes (85)	Rothes (85)	NJ 346 515	SCOTLAND		Mem. sh. 85, pp. 21, 48				U	334600	851500	http://www.bgs.ac.uk/data/britrocks/britrocks.cfc?method=viewSamples&sampleId=18036	http://www.largeimages.bgs.ac.uk/iip/britrocks.html?id=110000/117297	http://www.largeimages.bgs.ac.uk/iip/britrocks.html?id=110000/117296
285121										0	S934	934	934	934	Geikie,A.	*	'Original entry: Talcose Schist'	1	Railway cutting, Mulben, Speyside._x000D_SCOTLAND._x000D_Rothes (85)	Rothes (85)	NJ 346 515	SCOTLAND		Mem. sh. 85, pp. 21, 48				N	334600	851500	http://www.bgs.ac.uk/data/britrocks/britrocks.cfc?method=viewSamples&sampleId=285121	http://www.largeimages.bgs.ac.uk/iip/britrocks.html?id=110000/117299	http://www.largeimages.bgs.ac.uk/iip/britrocks.html?id=110000/117298
285122										0	S935; S935/A; S935/B;	935	935	935	Geikie,A.	*	'Original entry: Talcose Schist'	1	Railway cutting, Mulben, Speyside._x000D_SCOTLAND._x000D_Rothes (85)	Rothes (85)	NJ 346 515	SCOTLAND		Mem. sh. 85, pp. 21, 48				N	334600	851500	http://www.bgs.ac.uk/data/britrocks/britrocks.cfc?method=viewSamples&sampleId=285122	http://www.largeimages.bgs.ac.uk/iip/britrocks.html?id=110000/117301	http://www.largeimages.bgs.ac.uk/iip/britrocks.html?id=110000/117300	http://www.largeimages.bgs.ac.uk/iip/britrocks.html?id=110000/117303	http://www.largeimages.bgs.ac.uk/iip/britrocks.html?id=110000/117302	http://www.largeimages.bgs.ac.uk/iip/britrocks.html?id=110000/117305	http://www.largeimages.bgs.ac.uk/iip/britrocks.html?id=110000/117304
270836										0	S936	936	936	936	Geikie,A.	*	'Original entry: Mica Schist'	1	Top of Ben Feoin (?Fionn Bheinn), Achnasheen._x000D_SCOTLAND._x000D_Lochcarron (82)	Lochcarron (82)	NH 148 621	SCOTLAND		Garnets (edge of sheets 82 & 92)				N	214800	862100	http://www.bgs.ac.uk/data/britrocks/britrocks.cfc?method=viewSamples&sampleId=270836	http://www.largeimages.bgs.ac.uk/iip/britrocks.html?id=110000/117307	http://www.largeimages.bgs.ac.uk/iip/britrocks.html?id=110000/117306
284962										0	S937	937	937	937	Geikie,A.	*	'Original entry: Micaceous Sandstone'	1	Culloden Moor._x000D_SCOTLAND._x000D_Nairn (84)	Nairn (84)	NH 73 44	SCOTLAND		Ors flagstone				N	273000	844000	http://www.bgs.ac.uk/data/britrocks/britrocks.cfc?method=viewSamples&sampleId=284962	http://www.largeimages.bgs.ac.uk/iip/britrocks.html?id=110000/117309	http://www.largeimages.bgs.ac.uk/iip/britrocks.html?id=110000/117308
270837								X		0	S938	938	938	938	Geikie,A.	*	'Original entry: Mica Schist'	1	10 miles E of Ullapool, on Assynt Road._x000D_SCOTLAND._x000D_Ullapool (101)	Ullapool (101)	NC 170 055	SCOTLAND		Garnetiferous (?moine schist); sheet 101				N	217000	905500	http://www.bgs.ac.uk/data/britrocks/britrocks.cfc?method=viewSamples&sampleId=270837	http://www.largeimages.bgs.ac.uk/iip/britrocks.html?id=110000/117311	http://www.largeimages.bgs.ac.uk/iip/britrocks.html?id=110000/117310
270838										0	S939	939	939	939	Geikie,A.	*	'Original entry: Mylonite'	1	Dundonald Glen._x000D_SCOTLAND._x000D_Inverbroom (92)	Inverbroom (92)		SCOTLAND						N			http://www.bgs.ac.uk/data/britrocks/britrocks.cfc?method=viewSamples&sampleId=270838	http://www.largeimages.bgs.ac.uk/iip/britrocks.html?id=110000/117313	http://www.largeimages.bgs.ac.uk/iip/britrocks.html?id=110000/117312
270839										0	S941	941	941	941	Geikie,A.	*	'Original entry: Hornblende Gneiss'	1	Ben Fearn (?Fionn Bheinn), Achnasheen._x000D_SCOTLAND._x000D_Lochcarron (82)	Lochcarron (82)	NH 14 62	SCOTLAND		N edge of sh. 82, s edge of sh. 92				N	214000	862000	http://www.bgs.ac.uk/data/britrocks/britrocks.cfc?method=viewSamples&sampleId=270839	http://www.largeimages.bgs.ac.uk/iip/britrocks.html?id=110000/117317	http://www.largeimages.bgs.ac.uk/iip/britrocks.html?id=110000/117316
266000										0	S942	942	942	942	Geikie,A.	*	'Original entry: Biotite Gneiss'	1	Near bottom of Achnasheen Burn._x000D_SCOTLAND._x000D_Lochcarron (82)	Lochcarron (82)	NH 161 589	SCOTLAND		More flaser structure				N	216100	858900	http://www.bgs.ac.uk/data/britrocks/britrocks.cfc?method=viewSamples&sampleId=266000	http://www.largeimages.bgs.ac.uk/iip/britrocks.html?id=110000/117319	http://www.largeimages.bgs.ac.uk/iip/britrocks.html?id=110000/117318
276435										0	S943	943	943	943	Geikie,A.	*	'Original entry: Hornblende Schist'	1	Neave (or Coomb) Island, Tongue._x000D_SCOTLAND._x000D_Tongue (114)	Tongue (114)	NC 665 645	SCOTLAND						N	266500	964500	http://www.bgs.ac.uk/data/britrocks/britrocks.cfc?method=viewSamples&sampleId=276435	http://www.largeimages.bgs.ac.uk/iip/britrocks.html?id=110000/117321	http://www.largeimages.bgs.ac.uk/iip/britrocks.html?id=110000/117320
270840										0	S944	944	944	944	Geikie,A.	*	'Original entry: Amphibolite ?'	1	Near top of Ben Fearn (?Fionn Bheinn), Achnasheen._x000D_SCOTLAND._x000D_Inverbroom (92)	Inverbroom (92)	NH 14 62	SCOTLAND		N edge of sh. 82, s edge of sh. 92				N	214000	862000	http://www.bgs.ac.uk/data/britrocks/britrocks.cfc?method=viewSamples&sampleId=270840	http://www.largeimages.bgs.ac.uk/iip/britrocks.html?id=110000/117323	http://www.largeimages.bgs.ac.uk/iip/britrocks.html?id=110000/117322
259930										0	S945	945	945	945	Geikie,A.	*	'Original entry: Limestone (Cipolin)'	1	Polmaily, Glen Urquhart._x000D_SCOTLAND._x000D_Fort Augustus (73)	Fort Augustus (73)	NH 485 314	SCOTLAND		Mica and tremolite				N	248500	831400	http://www.bgs.ac.uk/data/britrocks/britrocks.cfc?method=viewSamples&sampleId=259930	http://www.largeimages.bgs.ac.uk/iip/britrocks.html?id=110000/117325	http://www.largeimages.bgs.ac.uk/iip/britrocks.html?id=110000/117324
266001										0	S946	946	946	946	Geikie,A.	*	'Original entry: Muscovite-Biotite Gneiss'	1	Achnasheen Burn._x000D_SCOTLAND._x000D_Lochcarron (82)	Lochcarron (82)	NH 16 59	SCOTLAND		Two micas				N	216000	859000	http://www.bgs.ac.uk/data/britrocks/britrocks.cfc?method=viewSamples&sampleId=266001	http://www.largeimages.bgs.ac.uk/iip/britrocks.html?id=110000/117327	http://www.largeimages.bgs.ac.uk/iip/britrocks.html?id=110000/117326
259924										0	S947; S947/A; S947/B;	947	947	947	Geikie,A.	*	'Original entry: Serpentine'	1	Above Polmaily, Glen Urquhart._x000D_SCOTLAND._x000D_Fort Augustus (73)	Fort Augustus (73)	NH 48 31	SCOTLAND						N	248000	831000	http://www.bgs.ac.uk/data/britrocks/britrocks.cfc?method=viewSamples&sampleId=259924	http://www.largeimages.bgs.ac.uk/iip/britrocks.html?id=110000/117329	http://www.largeimages.bgs.ac.uk/iip/britrocks.html?id=110000/117328	http://www.largeimages.bgs.ac.uk/iip/britrocks.html?id=110000/117331	http://www.largeimages.bgs.ac.uk/iip/britrocks.html?id=110000/117330
276436										0	S948	948	948	948	Geikie,A.	*	'Original entry: Hornblende Gneiss'	1	Neave (or Coomb) Island, Tongue._x000D_SCOTLAND._x000D_Tongue (114)	Tongue (114)	NC 665 645	SCOTLAND						N	266500	964500	http://www.bgs.ac.uk/data/britrocks/britrocks.cfc?method=viewSamples&sampleId=276436	http://www.largeimages.bgs.ac.uk/iip/britrocks.html?id=110000/117333	http://www.largeimages.bgs.ac.uk/iip/britrocks.html?id=110000/117332
283100										0	S949	949	949	949	Geikie,A.	*	'Original entry: Crushed Gneiss; Augen Gneiss?'	1	Near Strathpeffer._x000D_SCOTLAND._x000D_Inverness (83)	Inverness (83)	NH 488 586	SCOTLAND		(augen gneiss); epidotic (sheet 83)				N	248800	858600	http://www.bgs.ac.uk/data/britrocks/britrocks.cfc?method=viewSamples&sampleId=283100	http://www.largeimages.bgs.ac.uk/iip/britrocks.html?id=110000/117335	http://www.largeimages.bgs.ac.uk/iip/britrocks.html?id=110000/117334
266002										0	S950	950	950	950	Geikie,A.	*	'Original entry: Muscovite-Biotite Gneiss'	1	SE face of Meall a'Chaoruinn, Achnasheen._x000D_SCOTLAND._x000D_Lochcarron (82)	Lochcarron (82)	NH 139 601	SCOTLAND		Two micas				N	213900	860100	http://www.bgs.ac.uk/data/britrocks/britrocks.cfc?method=viewSamples&sampleId=266002	http://www.largeimages.bgs.ac.uk/iip/britrocks.html?id=110000/117337	http://www.largeimages.bgs.ac.uk/iip/britrocks.html?id=110000/117336
264950										0	S951	951	951	951	Geikie,A.	*	'Original entry: Biotite Gneiss'	1	Lairg Station._x000D_SCOTLAND._x000D_Lairg (102)	Lairg (102)	NC 582 039	SCOTLAND		'mica schist'				N	258200	903900	http://www.bgs.ac.uk/data/britrocks/britrocks.cfc?method=viewSamples&sampleId=264950	http://www.largeimages.bgs.ac.uk/iip/britrocks.html?id=110000/117339	http://www.largeimages.bgs.ac.uk/iip/britrocks.html?id=110000/117338
264951										0	S952	952	952	952	Geikie,A.	*	'Original entry: Biotite Gneiss'	1	Lairg Station._x000D_SCOTLAND._x000D_Lairg (102)	Lairg (102)	NC 582 039	SCOTLAND		'chlorite schist'				N	258200	903900	http://www.bgs.ac.uk/data/britrocks/britrocks.cfc?method=viewSamples&sampleId=264951	http://www.largeimages.bgs.ac.uk/iip/britrocks.html?id=110000/117341	http://www.largeimages.bgs.ac.uk/iip/britrocks.html?id=110000/117340
264952										0	S953	953	953	953	Geikie,A.	*	'Original entry: Biotite Gneiss'	1	Railway cutting N of Lairg Station._x000D_SCOTLAND._x000D_Lairg (102)	Lairg (102)	NC 585 043	SCOTLAND		'gneiss'				N	258500	904300	http://www.bgs.ac.uk/data/britrocks/britrocks.cfc?method=viewSamples&sampleId=264952	http://www.largeimages.bgs.ac.uk/iip/britrocks.html?id=110000/117343	http://www.largeimages.bgs.ac.uk/iip/britrocks.html?id=110000/117342
264953										0	S954	954	954	954	Geikie,A.	*	'Original entry: Biotite Gneiss'	1	Railway cutting N of Lairg Station._x000D_SCOTLAND._x000D_Lairg (102)	Lairg (102)	NC 585 043	SCOTLAND		'feldspathic quartz rock'				N	258500	904300	http://www.bgs.ac.uk/data/britrocks/britrocks.cfc?method=viewSamples&sampleId=264953	http://www.largeimages.bgs.ac.uk/iip/britrocks.html?id=110000/117345	http://www.largeimages.bgs.ac.uk/iip/britrocks.html?id=110000/117344
264954										0	S955	955	955	955	Geikie,A.	*	'Original entry: Biotite Gneiss'	1	Railway cutting N of Lairg Station._x000D_SCOTLAND._x000D_Lairg (102)	Lairg (102)	NC 585 043	SCOTLAND		'feldspathic quartz rock'				N	258500	904300	http://www.bgs.ac.uk/data/britrocks/britrocks.cfc?method=viewSamples&sampleId=264954	http://www.largeimages.bgs.ac.uk/iip/britrocks.html?id=110000/117347	http://www.largeimages.bgs.ac.uk/iip/britrocks.html?id=110000/117346
264955										0	S956	956	956	956	Geikie,A.	*	'Original entry: Biotite Gneiss'	1	Railway cutting N of Lairg Station._x000D_SCOTLAND._x000D_Lairg (102)	Lairg (102)	NC 585 043	SCOTLAND		'segregation seam'				N	258500	904300	http://www.bgs.ac.uk/data/britrocks/britrocks.cfc?method=viewSamples&sampleId=264955	http://www.largeimages.bgs.ac.uk/iip/britrocks.html?id=110000/117349	http://www.largeimages.bgs.ac.uk/iip/britrocks.html?id=110000/117348
264956										0	S957	957	957	957	Geikie,A.	*	'Original entry: Biotite Gneiss'	1	Railway cutting N of Lairg Station, north end._x000D_SCOTLAND._x000D_Lairg (102)	Lairg (102)	NC 585 043	SCOTLAND		Junction of granite and quartzite				N	258500	904300	http://www.bgs.ac.uk/data/britrocks/britrocks.cfc?method=viewSamples&sampleId=264956	http://www.largeimages.bgs.ac.uk/iip/britrocks.html?id=110000/117351	http://www.largeimages.bgs.ac.uk/iip/britrocks.html?id=110000/117350
264957										0	S958	958	958	958	Geikie,A.	*	'Original entry: Biotite Gneiss'	1	Between two bridges, Lairg._x000D_SCOTLAND._x000D_Lairg (102)	Lairg (102)	NC 586 044	SCOTLAND		Junction of granite and quartzite				N	258600	904400	http://www.bgs.ac.uk/data/britrocks/britrocks.cfc?method=viewSamples&sampleId=264957	http://www.largeimages.bgs.ac.uk/iip/britrocks.html?id=110000/117353	http://www.largeimages.bgs.ac.uk/iip/britrocks.html?id=110000/117352
264958										0	S959	959	959	959	Geikie,A.	*	'Original entry: Biotite Gneiss'	1	Between two bridges, Lairg._x000D_SCOTLAND._x000D_Lairg (102)	Lairg (102)	NC 586 044	SCOTLAND		Quartzite				N	258600	904400	http://www.bgs.ac.uk/data/britrocks/britrocks.cfc?method=viewSamples&sampleId=264958	http://www.largeimages.bgs.ac.uk/iip/britrocks.html?id=110000/117355	http://www.largeimages.bgs.ac.uk/iip/britrocks.html?id=110000/117354
264959										0	S960	960	960	960	Geikie,A.	*	'Original entry: Granite'	1	S cutting, Lairg._x000D_SCOTLAND._x000D_Lairg (102)	Lairg (102)	NC 590 050	SCOTLAND		Vein into which schist passes				N	259000	905000	http://www.bgs.ac.uk/data/britrocks/britrocks.cfc?method=viewSamples&sampleId=264959	http://www.largeimages.bgs.ac.uk/iip/britrocks.html?id=110000/117357	http://www.largeimages.bgs.ac.uk/iip/britrocks.html?id=110000/117356
264960										0	S961	961	961	961	Geikie,A.	*	'Original entry: Granite'	1	Second cutting N of Lairg._x000D_SCOTLAND._x000D_Lairg (102)	Lairg (102)	NC 598 052	SCOTLAND		Schistose quartzite				N	259800	905200	http://www.bgs.ac.uk/data/britrocks/britrocks.cfc?method=viewSamples&sampleId=264960	http://www.largeimages.bgs.ac.uk/iip/britrocks.html?id=110000/117359	http://www.largeimages.bgs.ac.uk/iip/britrocks.html?id=110000/117358
264961										0	S962	962	962	962	Geikie,A.	*	'Original entry: Granite'	1	From B.B., N cutting, Lairg._x000D_SCOTLAND._x000D_Lairg (102)	Lairg (102)	NC 598 052	SCOTLAND		Schistose quartzite				N	259800	905200	http://www.bgs.ac.uk/data/britrocks/britrocks.cfc?method=viewSamples&sampleId=264961	http://www.largeimages.bgs.ac.uk/iip/britrocks.html?id=110000/117361	http://www.largeimages.bgs.ac.uk/iip/britrocks.html?id=110000/117360
264962										0	S963	963	963	963	Geikie,A.	*	'Original entry: Granite'	1	Lairg Hotel._x000D_SCOTLAND._x000D_Lairg (102)	Lairg (102)	NC 582 063	SCOTLAND		?				N	258200	906300	http://www.bgs.ac.uk/data/britrocks/britrocks.cfc?method=viewSamples&sampleId=264962	http://www.largeimages.bgs.ac.uk/iip/britrocks.html?id=110000/117363	http://www.largeimages.bgs.ac.uk/iip/britrocks.html?id=110000/117362
264963										0	S964	964	964	964	Geikie,A.	*	'Original entry: Biotite Granite'	1	Second cutting, Lairg._x000D_SCOTLAND._x000D_Lairg (102)	Lairg (102)	NC 598 052	SCOTLAND		'granite'				N	259800	905200	http://www.bgs.ac.uk/data/britrocks/britrocks.cfc?method=viewSamples&sampleId=264963	http://www.largeimages.bgs.ac.uk/iip/britrocks.html?id=110000/117365	http://www.largeimages.bgs.ac.uk/iip/britrocks.html?id=110000/117364
264964										0	S965	965	965	965	Geikie,A.	*	'Original entry: Biotite Granite'	1	Second cutting, Lairg._x000D_SCOTLAND._x000D_Lairg (102)	Lairg (102)	NC 598 052	SCOTLAND		'granite'				N	259800	905200	http://www.bgs.ac.uk/data/britrocks/britrocks.cfc?method=viewSamples&sampleId=264964	http://www.largeimages.bgs.ac.uk/iip/britrocks.html?id=110000/117367	http://www.largeimages.bgs.ac.uk/iip/britrocks.html?id=110000/117366
284860										0	S966	966	966	966	Geikie,A.	*	'Original entry: Biotite Granite'	1	Rubislaw Quarry, SW Aberdeen._x000D_SCOTLAND._x000D_Aberdeen (77)	Aberdeen (77)	NJ 911 054	SCOTLAND						C	391100	805400	http://www.bgs.ac.uk/data/britrocks/britrocks.cfc?method=viewSamples&sampleId=284860	http://www.largeimages.bgs.ac.uk/iip/britrocks.html?id=110000/117369	http://www.largeimages.bgs.ac.uk/iip/britrocks.html?id=110000/117368
284861										0	S967	967	967	967	Geikie,A.	*	'Original entry: Biotite Granite'	1	Cove, 3 miles S of Aberdeen._x000D_SCOTLAND._x000D_Aberdeen (77)	Aberdeen (77)	NJ 952 003	SCOTLAND						C	395200	800300	http://www.bgs.ac.uk/data/britrocks/britrocks.cfc?method=viewSamples&sampleId=284861	http://www.largeimages.bgs.ac.uk/iip/britrocks.html?id=110000/117371	http://www.largeimages.bgs.ac.uk/iip/britrocks.html?id=110000/117370
276437										0	S968	968	968	968	Geikie,A.	*	'Original entry: Hornblende Granite'	1	Tongue._x000D_SCOTLAND._x000D_Tongue (114)	Tongue (114)	NC 59 57	SCOTLAND		From the boulder containing amazonstone				N	259000	957000	http://www.bgs.ac.uk/data/britrocks/britrocks.cfc?method=viewSamples&sampleId=276437	http://www.largeimages.bgs.ac.uk/iip/britrocks.html?id=110000/117373	http://www.largeimages.bgs.ac.uk/iip/britrocks.html?id=110000/117372
270841										0	S969	969	969	969	Geikie,A.	*	'Original entry: Gneiss ?'	1	Glen Cruachalie or Grudie, Loch Maree._x000D_SCOTLAND._x000D_Lochcarron (82)	Lochcarron (82)	NG 972 633	SCOTLAND						N	197200	863300	http://www.bgs.ac.uk/data/britrocks/britrocks.cfc?method=viewSamples&sampleId=270841	http://www.largeimages.bgs.ac.uk/iip/britrocks.html?id=110000/117375	http://www.largeimages.bgs.ac.uk/iip/britrocks.html?id=110000/117374
266003										0	S970	970	970	970	Geikie,A.	*	'Original entry: Microcline'	1	Top of Meall a'Chaoruinn, Achnasheen._x000D_SCOTLAND._x000D_Lochcarron (82)	Lochcarron (82)	NH 136 604	SCOTLAND		Feldspar and quartz in beds and veins				N	213600	860400	http://www.bgs.ac.uk/data/britrocks/britrocks.cfc?method=viewSamples&sampleId=266003	http://www.largeimages.bgs.ac.uk/iip/britrocks.html?id=110000/117377	http://www.largeimages.bgs.ac.uk/iip/britrocks.html?id=110000/117376
266004										0	S971	971	971	971	Geikie,A.	*	'Original entry: Microcline'	1	SE face of Meall a'Chaoruinn, Achnasheen._x000D_SCOTLAND._x000D_Lochcarron (82)	Lochcarron (82)	NH 139 601	SCOTLAND		Microperthite				N	213900	860100	http://www.bgs.ac.uk/data/britrocks/britrocks.cfc?method=viewSamples&sampleId=266004	http://www.largeimages.bgs.ac.uk/iip/britrocks.html?id=110000/117379	http://www.largeimages.bgs.ac.uk/iip/britrocks.html?id=110000/117378
275652										0	S972	972	972	972	Geikie,A.	*	'Original entry: Microgranite'	1	Muchalls shore._x000D_SCOTLAND._x000D_Stonehaven (67)	Stonehaven (67)	NO 9020 9135	SCOTLAND		Felsite dyke in schist				N	390200	791350	http://www.bgs.ac.uk/data/britrocks/britrocks.cfc?method=viewSamples&sampleId=275652	http://www.largeimages.bgs.ac.uk/iip/britrocks.html?id=110000/117381	http://www.largeimages.bgs.ac.uk/iip/britrocks.html?id=110000/117380
231106								X		2	S973; COLLNORYF1491;	973	973	973	Geikie,A.	*	'Original entry: Camptonite'	1	Near McLeod's Castle, Loch Assynt._x000D_SCOTLAND._x000D_Lochinver (107)	Lochinver (107)	NC 241 236	SCOTLAND		Porphyrite				N	224100	923600	http://www.bgs.ac.uk/data/britrocks/britrocks.cfc?method=viewSamples&sampleId=231106	http://www.largeimages.bgs.ac.uk/iip/britrocks.html?id=110000/117383	http://www.largeimages.bgs.ac.uk/iip/britrocks.html?id=110000/117382
231107								X		2	S974; COLLNORYF1492;	974	974	974	Geikie,A.	*	'Original entry: Pyroxene-Bearing Vogesite'	1	Near McLeod's Castle, Loch Assynt._x000D_SCOTLAND._x000D_Lochinver (107)	Lochinver (107)	NC 241 236	SCOTLAND		Porphyrite				N	224100	923600	http://www.bgs.ac.uk/data/britrocks/britrocks.cfc?method=viewSamples&sampleId=231107	http://www.largeimages.bgs.ac.uk/iip/britrocks.html?id=110000/117385	http://www.largeimages.bgs.ac.uk/iip/britrocks.html?id=110000/117384
259925										0	S976	976	976	976	Geikie,A.	*	'Original entry: Olivine Rock'	1	Polmaily, Glen Urquhart._x000D_SCOTLAND._x000D_Fort Augustus (73)	Fort Augustus (73)	NH 48 31	SCOTLAND						N	248000	831000	http://www.bgs.ac.uk/data/britrocks/britrocks.cfc?method=viewSamples&sampleId=259925	http://www.largeimages.bgs.ac.uk/iip/britrocks.html?id=110000/117389	http://www.largeimages.bgs.ac.uk/iip/britrocks.html?id=110000/117388
285263										0	S977	977	977	977	Geikie,A.	*	'Original entry: Grit'	1	Shore W of Lossiemouth._x000D_SCOTLAND._x000D_Elgin (95)	Elgin (95)	NJ 227 710	SCOTLAND		Near fault				N	322700	871000	http://www.bgs.ac.uk/data/britrocks/britrocks.cfc?method=viewSamples&sampleId=285263	http://www.largeimages.bgs.ac.uk/iip/britrocks.html?id=110000/117391	http://www.largeimages.bgs.ac.uk/iip/britrocks.html?id=110000/117390
398510		X								0	S978	978	978	978	Geikie,A.	*	'Original entry: Tachylite'	1	Dolerite of Salisbury Crags, after being fused in crucible._x000D_Edinburgh (32)	Edinburgh (32)	NT 26 73							N	326000	673000	http://www.bgs.ac.uk/data/britrocks/britrocks.cfc?method=viewSamples&sampleId=398510	http://www.largeimages.bgs.ac.uk/iip/britrocks.html?id=110000/117393	http://www.largeimages.bgs.ac.uk/iip/britrocks.html?id=110000/117392
377661				X						0	S980	980	980	980	Geikie,A.	*	'Original entry: Granulitic Grit'	1	Achanamara, near head of Loch Sween._x000D_SCOTLAND._x000D_Jura (28)	Jura (28)	NR 778 871	SCOTLAND		Granulitic grit, matrix of pebbly grit				N	177800	687100	http://www.bgs.ac.uk/data/britrocks/britrocks.cfc?method=viewSamples&sampleId=377661	http://www.largeimages.bgs.ac.uk/iip/britrocks.html?id=110000/117397	http://www.largeimages.bgs.ac.uk/iip/britrocks.html?id=110000/117396
377678				X						0	S981	981	981	981	Geikie,A.	*	'Original entry: Granulitic Grit'	1	NE of Castlesween._x000D_SCOTLAND._x000D_Jura (28)	Jura (28)	NR 710 790	SCOTLAND		Granulitic grit, matrix of pebbly grit				N	171000	679000	http://www.bgs.ac.uk/data/britrocks/britrocks.cfc?method=viewSamples&sampleId=377678	http://www.largeimages.bgs.ac.uk/iip/britrocks.html?id=110000/117399	http://www.largeimages.bgs.ac.uk/iip/britrocks.html?id=110000/117398
377679				X						0	S982	982	982	982	Geikie,A.	*	'Original entry: Granulitic Grit'	1	NE of Castlesween._x000D_SCOTLAND._x000D_Jura (28)	Jura (28)	NR 710 790	SCOTLAND		Granulitic grit, matrix of pebbly grit				N	171000	679000	http://www.bgs.ac.uk/data/britrocks/britrocks.cfc?method=viewSamples&sampleId=377679	http://www.largeimages.bgs.ac.uk/iip/britrocks.html?id=110000/117401	http://www.largeimages.bgs.ac.uk/iip/britrocks.html?id=110000/117400
378138				X						0	S983; S983/A; S983/B;	983	983	983	Geikie,A.	*		0	Shore Ardrishaig._x000D_SCOTLAND._x000D_Rothesay (29)	Rothesay (29)	NR 85 85	SCOTLAND		Chlorite slate				N	185000	685000	http://www.bgs.ac.uk/data/britrocks/britrocks.cfc?method=viewSamples&sampleId=378138	http://www.largeimages.bgs.ac.uk/iip/britrocks.html?id=110000/117403	http://www.largeimages.bgs.ac.uk/iip/britrocks.html?id=110000/117402	http://www.largeimages.bgs.ac.uk/iip/britrocks.html?id=110000/117405	http://www.largeimages.bgs.ac.uk/iip/britrocks.html?id=110000/117404
379215										0	S984	984	984	984	Geikie,A.	*	'Original entry: Chlorite Schist'	1	Inveraray Castle._x000D_SCOTLAND._x000D_Inverarray (37)	Inverarray (37)	NN 0961 0924	SCOTLAND		From one of the stones used in the part taken down in 1878; mid-argyll mem, p. 70				N	209610	709240	http://www.bgs.ac.uk/data/britrocks/britrocks.cfc?method=viewSamples&sampleId=379215	http://www.largeimages.bgs.ac.uk/iip/britrocks.html?id=110000/117407	http://www.largeimages.bgs.ac.uk/iip/britrocks.html?id=110000/117406
379216										0	S985	985	985	985	Geikie,A.	*	'Original entry: Chlorite Schist'	1	New quarry, St Catherine's._x000D_SCOTLAND._x000D_Inverarray (37)	Inverarray (37)	NN 1230 0722	SCOTLAND		Quarry opened for new part of inveraray castle; mid-argyll mem, p. 70				N	212300	707220	http://www.bgs.ac.uk/data/britrocks/britrocks.cfc?method=viewSamples&sampleId=379216	http://www.largeimages.bgs.ac.uk/iip/britrocks.html?id=110000/117409	http://www.largeimages.bgs.ac.uk/iip/britrocks.html?id=110000/117408
379217										0	S986; S986/A; S986/B;	986	986	986	Geikie,A.	*	'Original entry: Chlorite Schist'	1	St Catherine's, Inveraray._x000D_SCOTLAND._x000D_Inverarray (37)	Inverarray (37)	NN 12 07	SCOTLAND						N	212000	707000	http://www.bgs.ac.uk/data/britrocks/britrocks.cfc?method=viewSamples&sampleId=379217	http://www.largeimages.bgs.ac.uk/iip/britrocks.html?id=110000/117411	http://www.largeimages.bgs.ac.uk/iip/britrocks.html?id=110000/117410	http://www.largeimages.bgs.ac.uk/iip/britrocks.html?id=110000/117413	http://www.largeimages.bgs.ac.uk/iip/britrocks.html?id=110000/117412
377662				X						0	S987	987	987	987	Geikie,A.	*	'Original entry: Pillow Lava Series'	1	Achanamara, near head of Loch Sween._x000D_SCOTLAND._x000D_Jura (28)	Jura (28)	NR 778 871	SCOTLAND		Pillow lava series				N	177800	687100	http://www.bgs.ac.uk/data/britrocks/britrocks.cfc?method=viewSamples&sampleId=377662	http://www.largeimages.bgs.ac.uk/iip/britrocks.html?id=110000/117415	http://www.largeimages.bgs.ac.uk/iip/britrocks.html?id=110000/117414
325291				X						0	S988	988	988	988	Geikie,A.	*	Basalt. 'Original entry: Sandstone'	1	Achanamara, near head of Loch Sween._x000D_SCOTLAND._x000D_Jura (28)	Jura (28)	NR 778 871	SCOTLAND		Schistose grit	1981			U	177800	687100	http://www.bgs.ac.uk/data/britrocks/britrocks.cfc?method=viewSamples&sampleId=325291	http://www.largeimages.bgs.ac.uk/iip/britrocks.html?id=110000/117417	http://www.largeimages.bgs.ac.uk/iip/britrocks.html?id=110000/117416
377680				X						0	S989	989	989	989	Geikie,A.	*	'Original entry: Amphibolite'	1	NE of Castlesween._x000D_SCOTLAND._x000D_Jura (28)	Jura (28)	NR 710 790	SCOTLAND		Amphibolite				N	171000	679000	http://www.bgs.ac.uk/data/britrocks/britrocks.cfc?method=viewSamples&sampleId=377680	http://www.largeimages.bgs.ac.uk/iip/britrocks.html?id=110000/117419	http://www.largeimages.bgs.ac.uk/iip/britrocks.html?id=110000/117418
379218										0	S990	990	990	990	Geikie,A.	*	'Original entry: Biotite Porphyry'	1	Inveraray._x000D_SCOTLAND._x000D_Inverarray (37)	Inverarray (37)	NN 091 094	SCOTLAND						N	209100	709400	http://www.bgs.ac.uk/data/britrocks/britrocks.cfc?method=viewSamples&sampleId=379218	http://www.largeimages.bgs.ac.uk/iip/britrocks.html?id=110000/117421	http://www.largeimages.bgs.ac.uk/iip/britrocks.html?id=110000/117420
378139				X						0	S991	991	991	991	Geikie,A.	*	'Original entry: Tholeiite'	1	Shore Ardrishaig._x000D_SCOTLAND._x000D_Rothesay (29)	Rothesay (29)	NR 85 85	SCOTLAND		Tholeiite, dyke in schist				N	185000	685000	http://www.bgs.ac.uk/data/britrocks/britrocks.cfc?method=viewSamples&sampleId=378139	http://www.largeimages.bgs.ac.uk/iip/britrocks.html?id=110000/117423	http://www.largeimages.bgs.ac.uk/iip/britrocks.html?id=110000/117422
379219										0	S992	992	992	992	Geikie,A.	*	'Original entry: Biotite Porphyry'	1	Inveraray._x000D_SCOTLAND._x000D_Inverarray (37)	Inverarray (37)	NN 091 094	SCOTLAND						N	209100	709400	http://www.bgs.ac.uk/data/britrocks/britrocks.cfc?method=viewSamples&sampleId=379219	http://www.largeimages.bgs.ac.uk/iip/britrocks.html?id=110000/117425	http://www.largeimages.bgs.ac.uk/iip/britrocks.html?id=110000/117424
275654										0	S993	993	993	993	Geikie,A.	*	'Original entry: Chlorite Schist'	1	Shore, Muchalls._x000D_SCOTLAND._x000D_Stonehaven (67)	Stonehaven (67)	NO 90 92	SCOTLAND		Chlorite slate				N	390000	792000	http://www.bgs.ac.uk/data/britrocks/britrocks.cfc?method=viewSamples&sampleId=275654	http://www.largeimages.bgs.ac.uk/iip/britrocks.html?id=110000/117427	http://www.largeimages.bgs.ac.uk/iip/britrocks.html?id=110000/117426
292075										0	S994	994	994	994	Geikie,A.	*	'Original entry: Andalusite Schist'	1	W of Rosehearty._x000D_SCOTLAND._x000D_Fraserburgh (97)	Fraserburgh (97)	NJ 925 675	SCOTLAND						N	392500	867500	http://www.bgs.ac.uk/data/britrocks/britrocks.cfc?method=viewSamples&sampleId=292075	http://www.largeimages.bgs.ac.uk/iip/britrocks.html?id=110000/117429	http://www.largeimages.bgs.ac.uk/iip/britrocks.html?id=110000/117428
397561	X									0	S996	996	996	996	Geikie,A.	*	'Original entry: Phonolite'	1	Black Cove, Traprain Law (see Hadd 10 NE, old series)._x000D_Haddington (33)	Haddington (33)	NT 5834 7493			Syenite-like rock				N	358340	674930	http://www.bgs.ac.uk/data/britrocks/britrocks.cfc?method=viewSamples&sampleId=397561	http://www.largeimages.bgs.ac.uk/iip/britrocks.html?id=110000/117433	http://www.largeimages.bgs.ac.uk/iip/britrocks.html?id=110000/117432
397562	X									0	S997	997	997	997	Geikie,A.	*	'Original entry: Phonolite'	1	Black Cove, Traprain Law (see Hadd 10 NE, old series)._x000D_Haddington (33)	Haddington (33)	NT 5834 7493							N	358340	674930	http://www.bgs.ac.uk/data/britrocks/britrocks.cfc?method=viewSamples&sampleId=397562	http://www.largeimages.bgs.ac.uk/iip/britrocks.html?id=110000/117435	http://www.largeimages.bgs.ac.uk/iip/britrocks.html?id=110000/117434
397563	X									0	S998	998	998	998	Geikie,A.	*	'Original entry: Decomposed Rock'	1	Battery, Dunbar._x000D_Haddington (33)	Haddington (33)	NT 6815 7938							N	368150	679380	http://www.bgs.ac.uk/data/britrocks/britrocks.cfc?method=viewSamples&sampleId=397563	http://www.largeimages.bgs.ac.uk/iip/britrocks.html?id=110000/117437	http://www.largeimages.bgs.ac.uk/iip/britrocks.html?id=110000/117436
397564	X									0	S999	999	999	999	Geikie,A.	*	'Original entry: Decomposed Rock'	1	Shore, Dunbar._x000D_Haddington (33)	Haddington (33)	NT 68 79							N	368000	679000	http://www.bgs.ac.uk/data/britrocks/britrocks.cfc?method=viewSamples&sampleId=397564	http://www.largeimages.bgs.ac.uk/iip/britrocks.html?id=110000/117439	http://www.largeimages.bgs.ac.uk/iip/britrocks.html?id=110000/117438
397565	X									0	S1004	1004	1004	1004	Geikie,A.	*	'Original entry: Olivine-Basalt'	1	Blaikie Heugh, near Standingstone, 5 miles E of Haddington._x000D_Haddington (33)	Haddington (33)	NT 575 730			Olivine-basalt, craiglockhart type, altered				N	357500	673000	http://www.bgs.ac.uk/data/britrocks/britrocks.cfc?method=viewSamples&sampleId=397565	http://www.largeimages.bgs.ac.uk/iip/britrocks.html?id=110000/117449	http://www.largeimages.bgs.ac.uk/iip/britrocks.html?id=110000/117448
397566	X									0	S1005; S1005/A; S1005/B; S1005/C; S1005/D; S1005/E;	1005	1005	1005	Geikie,A.	*	'Original entry: Limburgite/Nepheline Basalt'	1	Chesters Quarry, Whitelaw Hill._x000D_Haddington (33)	Haddington (33)	NT 5699 7114			Limburgite/nepheline basalt, (monchiquite sill). east lothian mem. pl.x, fig.4, p. 127 and pp. 109 - 110				N	356990	671140	http://www.bgs.ac.uk/data/britrocks/britrocks.cfc?method=viewSamples&sampleId=397566	http://www.largeimages.bgs.ac.uk/iip/britrocks.html?id=110000/117451	http://www.largeimages.bgs.ac.uk/iip/britrocks.html?id=110000/117450	http://www.largeimages.bgs.ac.uk/iip/britrocks.html?id=110000/117453	http://www.largeimages.bgs.ac.uk/iip/britrocks.html?id=110000/117452	http://www.largeimages.bgs.ac.uk/iip/britrocks.html?id=110000/117455	http://www.largeimages.bgs.ac.uk/iip/britrocks.html?id=110000/117454	http://www.largeimages.bgs.ac.uk/iip/britrocks.html?id=110000/117456	http://www.largeimages.bgs.ac.uk/iip/britrocks.html?id=110000/117456	http://www.largeimages.bgs.ac.uk/iip/britrocks.html?id=110000/117459	http://www.largeimages.bgs.ac.uk/iip/britrocks.html?id=110000/117458
397567	X									0	S1006	1006	1006	1006	Geikie,A.	*	'Original entry: Quartz Banakite (Dolerite)'	1	Silver Hill, Garleton Hills._x000D_Haddington (33)	Haddington (33)	NT 4882 7516			Quartz banakite (dolerite), "porphyrite"				N	348820	675160	http://www.bgs.ac.uk/data/britrocks/britrocks.cfc?method=viewSamples&sampleId=397567	http://www.largeimages.bgs.ac.uk/iip/britrocks.html?id=110000/117463	http://www.largeimages.bgs.ac.uk/iip/britrocks.html?id=110000/117462
397568	X									0	S1007	1007	1007	1007	Geikie,A.	*	'Original entry: Trachyte'	1	Kae Heughs, Garleton Hills._x000D_Haddington (33)	Haddington (33)	NT 514 764							N	351400	676400	http://www.bgs.ac.uk/data/britrocks/britrocks.cfc?method=viewSamples&sampleId=397568	http://www.largeimages.bgs.ac.uk/iip/britrocks.html?id=110000/117465	http://www.largeimages.bgs.ac.uk/iip/britrocks.html?id=110000/117464
397569	X									0	S1008	1008	1008	1008	Geikie,A.	*	'Original entry: Andesite /Trachyte'	1	Kae Heughs, Garleton Hills._x000D_Haddington (33)	Haddington (33)	NT 514 764			Near quartz banakite				N	351400	676400	http://www.bgs.ac.uk/data/britrocks/britrocks.cfc?method=viewSamples&sampleId=397569	http://www.largeimages.bgs.ac.uk/iip/britrocks.html?id=110000/117467	http://www.largeimages.bgs.ac.uk/iip/britrocks.html?id=110000/117466
397570	X									0	S1011	1011	1011	1011	Geikie,A.	*	'Original entry: Olivine-Basalt'	1	Millstone Neuk, 1.75 miles SE of Dunbar.._x000D_Haddington (33)	Haddington (33)	NT 7078 7787			Olivine-basalt, craiglockhart type				N	370780	677870	http://www.bgs.ac.uk/data/britrocks/britrocks.cfc?method=viewSamples&sampleId=397570	http://www.largeimages.bgs.ac.uk/iip/britrocks.html?id=110000/117473	http://www.largeimages.bgs.ac.uk/iip/britrocks.html?id=110000/117472
397571	X									0	S1012	1012	1012	1012	Geikie,A.	*	'Original entry: Quartz Diabase (Dolerite)'	1	1.25 miles SE of Dunbar._x000D_Haddington (33)	Haddington (33)	NT 6933 7839			Dolerite dyke				N	369330	678390	http://www.bgs.ac.uk/data/britrocks/britrocks.cfc?method=viewSamples&sampleId=397571	http://www.largeimages.bgs.ac.uk/iip/britrocks.html?id=110000/117475	http://www.largeimages.bgs.ac.uk/iip/britrocks.html?id=110000/117474
397572	X									0	S1017	1017	1017	1017	Geikie,A.	*	'Original entry: Dyke Rock'	1	Banks of Dye Water, 1 mile downstream of Longformacus._x000D_Haddington (33)	Haddington (33)	NT 7079 5862			Dyke in old red sandstone				N	370790	658620	http://www.bgs.ac.uk/data/britrocks/britrocks.cfc?method=viewSamples&sampleId=397572	http://www.largeimages.bgs.ac.uk/iip/britrocks.html?id=110000/117485	http://www.largeimages.bgs.ac.uk/iip/britrocks.html?id=110000/117484
397573	X									0	S1018	1018	1018	1018	Geikie,A.	*	'Original entry: Dyke Rock'	1	Banks of Dye Water, 1 mile downstream of Longformacus._x000D_Haddington (33)	Haddington (33)	NT 7079 5862			Dyke in old red sandstone				N	370790	658620	http://www.bgs.ac.uk/data/britrocks/britrocks.cfc?method=viewSamples&sampleId=397573	http://www.largeimages.bgs.ac.uk/iip/britrocks.html?id=110000/117487	http://www.largeimages.bgs.ac.uk/iip/britrocks.html?id=110000/117486
287418										0	S1025	1025	1025	1025	Geikie,A.	*	'Original entry: Shale, Nodular'	1	Eilean Mhuire, Shiant Isles._x000D_SCOTLAND._x000D_Shieldinish ? (99)	Shieldinish ? (99)	NG 430 988	SCOTLAND		Collected by ds, 1894; under thick sill				N	143000	898800	http://www.bgs.ac.uk/data/britrocks/britrocks.cfc?method=viewSamples&sampleId=287418	http://www.largeimages.bgs.ac.uk/iip/britrocks.html?id=110000/117739	http://www.largeimages.bgs.ac.uk/iip/britrocks.html?id=110000/117738
360373				X						0	S1026	1026	1026	1026	Geikie,A.	*	'Original entry: Pinites Eiggensis'	1	Eigg._x000D_SCOTLAND._x000D_Rum (60)	Rum (60)	NM 4 8	SCOTLAND		Under pitchstone				N	140000	780000	http://www.bgs.ac.uk/data/britrocks/britrocks.cfc?method=viewSamples&sampleId=360373
368226						X				0	S1035	1035	1035	1035	Geikie,A.	*	'Original entry: Black Grit'	1	Rock and Spindle._x000D_SCOTLAND._x000D_Arbroath (49)	Arbroath (49)	NO 5386 1558	SCOTLAND		Not a tuff: from a neck				N	353860	715580	http://www.bgs.ac.uk/data/britrocks/britrocks.cfc?method=viewSamples&sampleId=368226	http://www.largeimages.bgs.ac.uk/iip/britrocks.html?id=110000/117759	http://www.largeimages.bgs.ac.uk/iip/britrocks.html?id=110000/117758
382934						X				0	S1039	1039	1039	1039	Geikie,A.	*	'Original entry: Cherty Limestone'	1	Navitie Hill, 4 miles N of Loch Gelly._x000D_SCOTLAND._x000D_Kinross (40)	Kinross (40)	NT 172 982	SCOTLAND						N	317200	698200	http://www.bgs.ac.uk/data/britrocks/britrocks.cfc?method=viewSamples&sampleId=382934	http://www.largeimages.bgs.ac.uk/iip/britrocks.html?id=110000/117773	http://www.largeimages.bgs.ac.uk/iip/britrocks.html?id=110000/117772
382935						X				0	S1040	1040	1040	1040	Geikie,A.	*	'Original entry: Cherty Limestone'	1	Navitie Hill, 4 miles N of Loch Gelly._x000D_SCOTLAND._x000D_Kinross (40)	Kinross (40)	NT 172 982	SCOTLAND						N	317200	698200	http://www.bgs.ac.uk/data/britrocks/britrocks.cfc?method=viewSamples&sampleId=382935	http://www.largeimages.bgs.ac.uk/iip/britrocks.html?id=110000/117775	http://www.largeimages.bgs.ac.uk/iip/britrocks.html?id=110000/117774
382936						X				0	S1041	1041	1041	1041	Geikie,A.	*	'Original entry: Ophitic Olivine-Dolerite'	1	Bishop Hill, Kinnesswood._x000D_SCOTLAND._x000D_Kinross (40)	Kinross (40)	NO 183 043	SCOTLAND						N	318300	704300	http://www.bgs.ac.uk/data/britrocks/britrocks.cfc?method=viewSamples&sampleId=382936	http://www.largeimages.bgs.ac.uk/iip/britrocks.html?id=110000/117777	http://www.largeimages.bgs.ac.uk/iip/britrocks.html?id=110000/117776
397574	X									0	S1042	1042	1042	1042	Geikie,A.	*	'Original entry: Dolerite'	1	Ravens Craig, banks of Whiteadder River, near Cranshaws._x000D_Haddington (33)	Haddington (33)	NT 6995 5995			Dolerite dyke, altered				N	369950	659950	http://www.bgs.ac.uk/data/britrocks/britrocks.cfc?method=viewSamples&sampleId=397574	http://www.largeimages.bgs.ac.uk/iip/britrocks.html?id=110000/117779	http://www.largeimages.bgs.ac.uk/iip/britrocks.html?id=110000/117778
382937						X				0	S1052	1052	1052	1052	Geikie,A.	*	'Original entry: Dolerite'	1	E of Abden (limestone), shore E of Kinghorn._x000D_SCOTLAND._x000D_Kinross (40)	Kinross (40)	NT 275 874	SCOTLAND						N	327500	687400	http://www.bgs.ac.uk/data/britrocks/britrocks.cfc?method=viewSamples&sampleId=382937	http://www.largeimages.bgs.ac.uk/iip/britrocks.html?id=110000/117805	http://www.largeimages.bgs.ac.uk/iip/britrocks.html?id=110000/117804
382938						X				0	S1053	1053	1053	1053	Geikie,A.	*	'Original entry: Dolerite (Decomposed)'	1	Cliff E of Poorhouse, Kinghorn._x000D_SCOTLAND._x000D_Kinross (40)	Kinross (40)	NT 2766 8784	SCOTLAND						N	327660	687840	http://www.bgs.ac.uk/data/britrocks/britrocks.cfc?method=viewSamples&sampleId=382938	http://www.largeimages.bgs.ac.uk/iip/britrocks.html?id=110000/117807	http://www.largeimages.bgs.ac.uk/iip/britrocks.html?id=110000/117806
382939						X				0	S1054	1054	1054	1054	Geikie,A.	*	'Original entry: Dolerite'	1	Shore at cave E of Poorhouse, Kinghorn._x000D_SCOTLAND._x000D_Kinross (40)	Kinross (40)	NT 2776 8812	SCOTLAND						N	327760	688120	http://www.bgs.ac.uk/data/britrocks/britrocks.cfc?method=viewSamples&sampleId=382939	http://www.largeimages.bgs.ac.uk/iip/britrocks.html?id=110000/117809	http://www.largeimages.bgs.ac.uk/iip/britrocks.html?id=110000/117808
377201					X					0	S1055	1055	1055	1055	Geikie,A.	*	'Original entry: Araucarioxylon Withamii'	1	Lennel Braes, River Tweed._x000D_SCOTLAND._x000D_Berwick-upon-Tweed (26)	Berwick-upon-Tweed (26)	NT 86 41	SCOTLAND						N	386000	641000	http://www.bgs.ac.uk/data/britrocks/britrocks.cfc?method=viewSamples&sampleId=377201	http://www.largeimages.bgs.ac.uk/iip/britrocks.html?id=110000/117811	http://www.largeimages.bgs.ac.uk/iip/britrocks.html?id=110000/117810
397657	X									0	S1136	1136	1136	1136	Geikie,A.	*	'Original entry: Saccammina Limestone'	1	Cat Craig, Dunbar._x000D_Haddington (33)	Haddington (33)	NT 714 772			Saccammina limestone				N	371400	677200	http://www.bgs.ac.uk/data/britrocks/britrocks.cfc?method=viewSamples&sampleId=397657	http://www.largeimages.bgs.ac.uk/iip/britrocks.html?id=110000/117973	http://www.largeimages.bgs.ac.uk/iip/britrocks.html?id=110000/117972
282937										0	S1182	1182	1182	1182	Geikie,A.	*	'Original entry: Andesite & Serpentine'	1	Near Blairgowrie._x000D_SCOTLAND._x000D_Blairgowrie (56)	Blairgowrie (56)	NO 180 465	SCOTLAND		Dyke; serpentine				N	318000	746500	http://www.bgs.ac.uk/data/britrocks/britrocks.cfc?method=viewSamples&sampleId=282937	http://www.largeimages.bgs.ac.uk/iip/britrocks.html?id=110000/118069	http://www.largeimages.bgs.ac.uk/iip/britrocks.html?id=110000/118068
383042						X				0	S1207	1207	1207	1207	Geikie,A.	*	'Original entry: Quartzose Tuff'	1	Shore, Pettycur._x000D_SCOTLAND._x000D_Kinross (40)	Kinross (40)	NT 256 863	SCOTLAND		From neck				N	325600	686300	http://www.bgs.ac.uk/data/britrocks/britrocks.cfc?method=viewSamples&sampleId=383042	http://www.largeimages.bgs.ac.uk/iip/britrocks.html?id=110000/118121	http://www.largeimages.bgs.ac.uk/iip/britrocks.html?id=110000/118120
383043						X				0	S1208	1208	1208	1208	Geikie,A.	*	'Original entry: Fibrous Gypsum'	1	Shore, Pettycur._x000D_SCOTLAND._x000D_Kinross (40)	Kinross (40)	NT 256 863	SCOTLAND		In tuff				N	325600	686300	http://www.bgs.ac.uk/data/britrocks/britrocks.cfc?method=viewSamples&sampleId=383043	http://www.largeimages.bgs.ac.uk/iip/britrocks.html?id=110000/118123	http://www.largeimages.bgs.ac.uk/iip/britrocks.html?id=110000/118122
398620		X								0	S1209; S1209/a; S1209/b;	1209	1209	1209	Geikie,A.	*	'Original entry: Grit W'	1	Hound Point._x000D_Edinburgh (32)	Edinburgh (32)	NT 1587 7947							N	315870	679470	http://www.bgs.ac.uk/data/britrocks/britrocks.cfc?method=viewSamples&sampleId=398620	http://www.largeimages.bgs.ac.uk/iip/britrocks.html?id=110000/118125	http://www.largeimages.bgs.ac.uk/iip/britrocks.html?id=110000/118124	http://www.largeimages.bgs.ac.uk/iip/britrocks.html?id=110000/118127	http://www.largeimages.bgs.ac.uk/iip/britrocks.html?id=110000/118126
398621		X								0	S1210	1210	1210	1210	Geikie,A.	*	'Original entry: Quartz Dolerite F'	1	Hound Point._x000D_Edinburgh (32)	Edinburgh (32)	NT 1583 7953			Crystalline dolerite				N	315830	679530	http://www.bgs.ac.uk/data/britrocks/britrocks.cfc?method=viewSamples&sampleId=398621	http://www.largeimages.bgs.ac.uk/iip/britrocks.html?id=110000/118129	http://www.largeimages.bgs.ac.uk/iip/britrocks.html?id=110000/118128
398622		X								0	S1211	1211	1211	1211	Geikie,A.	*	'Original entry: Diabase'	1	Hound Point._x000D_Edinburgh (32)	Edinburgh (32)	NT 1584 7951			Pale and fine-grained				N	315840	679510	http://www.bgs.ac.uk/data/britrocks/britrocks.cfc?method=viewSamples&sampleId=398622	http://www.largeimages.bgs.ac.uk/iip/britrocks.html?id=110000/118131	http://www.largeimages.bgs.ac.uk/iip/britrocks.html?id=110000/118130
398623		X								0	S1212	1212	1212	1212	Geikie,A.	*	'Original entry: Diabase (Chilled Edge)'	1	Hound Point._x000D_Edinburgh (32)	Edinburgh (32)	NT 1584 7951			Still paler and more compact than s 1211				N	315840	679510	http://www.bgs.ac.uk/data/britrocks/britrocks.cfc?method=viewSamples&sampleId=398623	http://www.largeimages.bgs.ac.uk/iip/britrocks.html?id=110000/118133	http://www.largeimages.bgs.ac.uk/iip/britrocks.html?id=110000/118132
398624		X								0	S1213	1213	1213	1213	Geikie,A.	*	'Original entry: Dolerite, Much Decomposed F'	1	Hound Point._x000D_Edinburgh (32)	Edinburgh (32)	NT 1584 7951			Still paler and more compact than s 1211				N	315840	679510	http://www.bgs.ac.uk/data/britrocks/britrocks.cfc?method=viewSamples&sampleId=398624	http://www.largeimages.bgs.ac.uk/iip/britrocks.html?id=110000/118135	http://www.largeimages.bgs.ac.uk/iip/britrocks.html?id=110000/118134
398625		X								0	S1214	1214	1214	1214	Geikie,A.	*	'Original entry: Dolerite, Much Decomposed F'	1	Hound Point._x000D_Edinburgh (32)	Edinburgh (32)	NT 1584 7951			"white trap"				N	315840	679510	http://www.bgs.ac.uk/data/britrocks/britrocks.cfc?method=viewSamples&sampleId=398625	http://www.largeimages.bgs.ac.uk/iip/britrocks.html?id=110000/118137	http://www.largeimages.bgs.ac.uk/iip/britrocks.html?id=110000/118136
398626		X								0	S1215; S1215/a; S1215/b;	1215	1215	1215	Geikie,A.	*	'Original entry: Shale And Diabase (Contact) F'	1	Hound Point._x000D_Edinburgh (32)	Edinburgh (32)	NT 1585 7950			Altered black shale; edinburgh mem, 1910, pp. 309, 314 and plate x, fig. 1				N	315850	679500	http://www.bgs.ac.uk/data/britrocks/britrocks.cfc?method=viewSamples&sampleId=398626	http://www.largeimages.bgs.ac.uk/iip/britrocks.html?id=110000/118139	http://www.largeimages.bgs.ac.uk/iip/britrocks.html?id=110000/118138	http://www.largeimages.bgs.ac.uk/iip/britrocks.html?id=110000/118141	http://www.largeimages.bgs.ac.uk/iip/britrocks.html?id=110000/118140
398627		X								0	S1280	1280	1280	1280	Geikie,A.	*	'Original entry: Sandstone And Tachylite Vein'	1	Salisbury Crags SE end._x000D_Edinburgh (32)	Edinburgh (32)	NT 273 728			Small vein of basalt in sandstone; edinburgh mem, 1910, pp. 277, 313 and plate xi, fig. 6				N	327300	672800	http://www.bgs.ac.uk/data/britrocks/britrocks.cfc?method=viewSamples&sampleId=398627	http://www.largeimages.bgs.ac.uk/iip/britrocks.html?id=110000/119385	http://www.largeimages.bgs.ac.uk/iip/britrocks.html?id=110000/119384
398628		X								0	S1281	1281	1281	1281	Geikie,A.	*	'Original entry: Sandstone And Tachylite Vein'	1	Salisbury Crags SE end._x000D_Edinburgh (32)	Edinburgh (32)	NT 273 728			Sandstone and basalt				N	327300	672800	http://www.bgs.ac.uk/data/britrocks/britrocks.cfc?method=viewSamples&sampleId=398628	http://www.largeimages.bgs.ac.uk/iip/britrocks.html?id=110000/119387	http://www.largeimages.bgs.ac.uk/iip/britrocks.html?id=110000/119386
398629		X								0	S1373	1373	1373	1373	Geikie,A.	*	'Original entry: Tachylite And Altered Shale'	1	South end Salisbury Crags._x000D_Edinburgh (32)	Edinburgh (32)	NT 273 728			Junction of dolerite and altered shale				N	327300	672800	http://www.bgs.ac.uk/data/britrocks/britrocks.cfc?method=viewSamples&sampleId=398629
398630		X								0	S1374	1374	1374	1374	Geikie,A.	*	'Original entry: Tachylite And Altered Shale'	1	South end Salisbury Crags._x000D_Edinburgh (32)	Edinburgh (32)	NT 273 728			Junction of dolerite and altered shale				N	327300	672800	http://www.bgs.ac.uk/data/britrocks/britrocks.cfc?method=viewSamples&sampleId=398630	http://www.largeimages.bgs.ac.uk/iip/britrocks.html?id=110000/119585	http://www.largeimages.bgs.ac.uk/iip/britrocks.html?id=110000/119584
398631		X								0	S1375	1375	1375	1375	Geikie,A.	*	'Original entry: Basalt'	1	South end Salisbury Crags._x000D_Edinburgh (32)	Edinburgh (32)	NT 273 728			Junction of dolerite and altered shale				N	327300	672800	http://www.bgs.ac.uk/data/britrocks/britrocks.cfc?method=viewSamples&sampleId=398631
398632		X								0	S1376; S1376/a;	1376	1376	1376	Geikie,A.	*	'Original entry: Tachylite And Altered Sandstone'	1	South end Salisbury Crags._x000D_Edinburgh (32)	Edinburgh (32)	NT 273 728							N	327300	672800	http://www.bgs.ac.uk/data/britrocks/britrocks.cfc?method=viewSamples&sampleId=398632	http://www.largeimages.bgs.ac.uk/iip/britrocks.html?id=110000/119587	http://www.largeimages.bgs.ac.uk/iip/britrocks.html?id=110000/119586	http://www.largeimages.bgs.ac.uk/iip/britrocks.html?id=110000/119589	http://www.largeimages.bgs.ac.uk/iip/britrocks.html?id=110000/119588
398633		X								0	S1377; S1377/a;	1377	1377	1377	Geikie,A.	*	'Original entry: Teschenite, Margin'	1	South end Salisbury Crags._x000D_Edinburgh (32)	Edinburgh (32)	NT 273 728							N	327300	672800	http://www.bgs.ac.uk/data/britrocks/britrocks.cfc?method=viewSamples&sampleId=398633	http://www.largeimages.bgs.ac.uk/iip/britrocks.html?id=110000/119591	http://www.largeimages.bgs.ac.uk/iip/britrocks.html?id=110000/119590	http://www.largeimages.bgs.ac.uk/iip/britrocks.html?id=110000/119593	http://www.largeimages.bgs.ac.uk/iip/britrocks.html?id=110000/119592
398634		X								0	S1378	1378	1378	1378	Geikie,A.	*	'Original entry: Teschenite, Margin F'	1	South end Salisbury Crags._x000D_Edinburgh (32)	Edinburgh (32)	NT 273 728							N	327300	672800	http://www.bgs.ac.uk/data/britrocks/britrocks.cfc?method=viewSamples&sampleId=398634	http://www.largeimages.bgs.ac.uk/iip/britrocks.html?id=110000/119595	http://www.largeimages.bgs.ac.uk/iip/britrocks.html?id=110000/119594
398635		X								0	S1379	1379	1379	1379	Geikie,A.	*	'Original entry: Teschenite, Margin F'	1	South end Salisbury Crags._x000D_Edinburgh (32)	Edinburgh (32)	NT 273 728							N	327300	672800	http://www.bgs.ac.uk/data/britrocks/britrocks.cfc?method=viewSamples&sampleId=398635	http://www.largeimages.bgs.ac.uk/iip/britrocks.html?id=110000/119597	http://www.largeimages.bgs.ac.uk/iip/britrocks.html?id=110000/119596
398636		X								0	S1380; S1380/a;	1380	1380	1380	Geikie,A.	*	'Original entry: Altered Shale F'	1	South end of Salisbury Crags._x000D_Edinburgh (32)	Edinburgh (32)	NT 273 728							N	327300	672800	http://www.bgs.ac.uk/data/britrocks/britrocks.cfc?method=viewSamples&sampleId=398636	http://www.largeimages.bgs.ac.uk/iip/britrocks.html?id=110000/119599	http://www.largeimages.bgs.ac.uk/iip/britrocks.html?id=110000/119598	http://www.largeimages.bgs.ac.uk/iip/britrocks.html?id=110000/119601	http://www.largeimages.bgs.ac.uk/iip/britrocks.html?id=110000/119600
398637		X								0	S1381	1381	1381	1381	Geikie,A.	*	'Original entry: Altered Shale F'	1	Salisbury Crags._x000D_Edinburgh (32)	Edinburgh (32)	NT 26 73							N	326000	673000	http://www.bgs.ac.uk/data/britrocks/britrocks.cfc?method=viewSamples&sampleId=398637	http://www.largeimages.bgs.ac.uk/iip/britrocks.html?id=110000/119603	http://www.largeimages.bgs.ac.uk/iip/britrocks.html?id=110000/119602
398638		X								0	S1382	1382	1382	1382	Geikie,A.	*	'Original entry: Altered Sandstone F'	1	Salisbury Crags._x000D_Edinburgh (32)	Edinburgh (32)	NT 26 73			Quartzite and altered shale				N	326000	673000	http://www.bgs.ac.uk/data/britrocks/britrocks.cfc?method=viewSamples&sampleId=398638	http://www.largeimages.bgs.ac.uk/iip/britrocks.html?id=110000/119605	http://www.largeimages.bgs.ac.uk/iip/britrocks.html?id=110000/119604
398639		X								0	S1383	1383	1383	1383	Geikie,A.	*	'Original entry: Altered Sandstone F'	1	Salisbury Crags._x000D_Edinburgh (32)	Edinburgh (32)	NT 26 73			Quartzite and altered shale				N	326000	673000	http://www.bgs.ac.uk/data/britrocks/britrocks.cfc?method=viewSamples&sampleId=398639	http://www.largeimages.bgs.ac.uk/iip/britrocks.html?id=110000/119607	http://www.largeimages.bgs.ac.uk/iip/britrocks.html?id=110000/119606
398640		X								0	S1384	1384	1384	1384	Geikie,A.	*	'Original entry: Teschenite Margin F'	1	Salisbury Crags._x000D_Edinburgh (32)	Edinburgh (32)	NT 26 73							N	326000	673000	http://www.bgs.ac.uk/data/britrocks/britrocks.cfc?method=viewSamples&sampleId=398640	http://www.largeimages.bgs.ac.uk/iip/britrocks.html?id=110000/119609	http://www.largeimages.bgs.ac.uk/iip/britrocks.html?id=110000/119608
394921										0	S1389	1389	1389	1389	Geikie,A.	*	'Original entry: Oolitic Ironstone'	1	Hardhill, Pit, 2 milies S. of Bathgate._x000D_Airdrie (31)	Airdrie (31)	NS 95 68			[wrongly assigned to sheet 30]				N	295000	668000	http://www.bgs.ac.uk/data/britrocks/britrocks.cfc?method=viewSamples&sampleId=394921	http://www.largeimages.bgs.ac.uk/iip/britrocks.html?id=110000/119619	http://www.largeimages.bgs.ac.uk/iip/britrocks.html?id=110000/119618
277240										0	S1400	1400	1400	1400	Geikie,A.	*	'Original entry: Felsite (Pink)'	1	Pitscow, Strichen._x000D_SCOTLAND._x000D_Peterhead (87)	Peterhead (87)	NK 0025 5170	SCOTLAND						N	400250	851700	http://www.bgs.ac.uk/data/britrocks/britrocks.cfc?method=viewSamples&sampleId=277240	http://www.largeimages.bgs.ac.uk/iip/britrocks.html?id=110000/119657	http://www.largeimages.bgs.ac.uk/iip/britrocks.html?id=110000/119656
277307										0	S1401	1401	1401	1401	Geikie,A.	*	'Original entry: Biotite Norite'	1	Bruckley, Strichen._x000D_SCOTLAND._x000D_Peterhead (87)	Peterhead (87)	NJ 926 504	SCOTLAND						N	392600	850400	http://www.bgs.ac.uk/data/britrocks/britrocks.cfc?method=viewSamples&sampleId=277307	http://www.largeimages.bgs.ac.uk/iip/britrocks.html?id=110000/119659	http://www.largeimages.bgs.ac.uk/iip/britrocks.html?id=110000/119658
292076										0	S1402	1402	1402	1402	Geikie,A.	*	'Original entry: Biotite Granite?'	1	St Colms, Cairnbulg._x000D_SCOTLAND._x000D_Fraserburgh (97)	Fraserburgh (97)	NK 056 633	SCOTLAND		"from brecciated quartzose rock"				N	405600	863300	http://www.bgs.ac.uk/data/britrocks/britrocks.cfc?method=viewSamples&sampleId=292076	http://www.largeimages.bgs.ac.uk/iip/britrocks.html?id=110000/119661	http://www.largeimages.bgs.ac.uk/iip/britrocks.html?id=110000/119660
278015										0	S1403	1403	1403	1403	Geikie,A.	*	'Original entry: Grit (Pebbly)'	1	Banff Station._x000D_SCOTLAND._x000D_Banff (96)	Banff (96)	NJ 6875 6465	SCOTLAND						N	368750	864650	http://www.bgs.ac.uk/data/britrocks/britrocks.cfc?method=viewSamples&sampleId=278015	http://www.largeimages.bgs.ac.uk/iip/britrocks.html?id=110000/119663	http://www.largeimages.bgs.ac.uk/iip/britrocks.html?id=110000/119662
292077										0	S1404	1404	1404	1404	Geikie,A.	*	'Original entry: Biotite Gneiss'	1	Counar Hall, near Pitsligo._x000D_SCOTLAND._x000D_Fraserburgh (97)	Fraserburgh (97)	NJ 93 66	SCOTLAND		"pebbly rock from schists"				N	393000	866000	http://www.bgs.ac.uk/data/britrocks/britrocks.cfc?method=viewSamples&sampleId=292077	http://www.largeimages.bgs.ac.uk/iip/britrocks.html?id=110000/119665	http://www.largeimages.bgs.ac.uk/iip/britrocks.html?id=110000/119664
284963										0	S1405	1405	1405	1405	Geikie,A.	*	'Original entry: Biotite Gneiss'	1	Daltulich Bridge, 500 yds WNW of Relugas._x000D_SCOTLAND._x000D_Nairn (84)	Nairn (84)	NH 986 487	SCOTLAND		On county boundary nairn/elgin				N	298600	848700	http://www.bgs.ac.uk/data/britrocks/britrocks.cfc?method=viewSamples&sampleId=284963	http://www.largeimages.bgs.ac.uk/iip/britrocks.html?id=110000/119667	http://www.largeimages.bgs.ac.uk/iip/britrocks.html?id=110000/119666
398768		X								0	S1482	1482	1482	1482	Geikie,A.	*	'Original entry: Devitrified Glass'	1	Esk Glass Works slag, Musselburgh._x000D_Edinburgh (32)	Edinburgh (32)	NT 34 72			Glass slag				N	334000	672000	http://www.bgs.ac.uk/data/britrocks/britrocks.cfc?method=viewSamples&sampleId=398768	http://www.largeimages.bgs.ac.uk/iip/britrocks.html?id=110000/119825	http://www.largeimages.bgs.ac.uk/iip/britrocks.html?id=110000/119824
398769		X								0	S1483	1483	1483	1483	Geikie,A.	*	'Original entry: Glass, Artificial'	1	Esk Glass Works slag, Musselburgh._x000D_Edinburgh (32)	Edinburgh (32)	NT 34 72			Glass slag				N	334000	672000	http://www.bgs.ac.uk/data/britrocks/britrocks.cfc?method=viewSamples&sampleId=398769	http://www.largeimages.bgs.ac.uk/iip/britrocks.html?id=110000/119827	http://www.largeimages.bgs.ac.uk/iip/britrocks.html?id=110000/119826
398848		X								0	S1484	1484	1484	1484	Geikie,A.	*	'Original entry: Wollastonite Slag'	1	Esk Glass Works slag, Musselburgh._x000D_Edinburgh (32)	Edinburgh (32)	NT 34 72			Glass slag				N	334000	672000	http://www.bgs.ac.uk/data/britrocks/britrocks.cfc?method=viewSamples&sampleId=398848	http://www.largeimages.bgs.ac.uk/iip/britrocks.html?id=110000/119829	http://www.largeimages.bgs.ac.uk/iip/britrocks.html?id=110000/119828
398849		X								0	S1485	1485	1485	1485	Geikie,A.	*	'Original entry: Wollastonite Slag'	1	Esk Glass Works slag, Musselburgh._x000D_Edinburgh (32)	Edinburgh (32)	NT 34 72			Glass slag				N	334000	672000	http://www.bgs.ac.uk/data/britrocks/britrocks.cfc?method=viewSamples&sampleId=398849	http://www.largeimages.bgs.ac.uk/iip/britrocks.html?id=110000/119831	http://www.largeimages.bgs.ac.uk/iip/britrocks.html?id=110000/119830
398850		X								0	S1486	1486	1486	1486	Geikie,A.	*	'Original entry: Wollastonite Slag'	1	Esk Glass Works slag, Musselburgh._x000D_Edinburgh (32)	Edinburgh (32)	NT 34 72			Glass slag				N	334000	672000	http://www.bgs.ac.uk/data/britrocks/britrocks.cfc?method=viewSamples&sampleId=398850	http://www.largeimages.bgs.ac.uk/iip/britrocks.html?id=110000/119833	http://www.largeimages.bgs.ac.uk/iip/britrocks.html?id=110000/119832
398851		X								0	S1487	1487	1487	1487	Geikie,A.	*	'Original entry: Wollastonite Slag'	1	Esk Glass Works slag, Musselburgh._x000D_Edinburgh (32)	Edinburgh (32)	NT 34 72			Glass slag				N	334000	672000	http://www.bgs.ac.uk/data/britrocks/britrocks.cfc?method=viewSamples&sampleId=398851	http://www.largeimages.bgs.ac.uk/iip/britrocks.html?id=110000/119835	http://www.largeimages.bgs.ac.uk/iip/britrocks.html?id=110000/119834
398852		X								0	S1488	1488	1488	1488	Geikie,A.	*	'Original entry: Devitrified Glass'	1	Esk Glass Works slag, Musselburgh._x000D_Edinburgh (32)	Edinburgh (32)	NT 34 72			Glass slag				N	334000	672000	http://www.bgs.ac.uk/data/britrocks/britrocks.cfc?method=viewSamples&sampleId=398852	http://www.largeimages.bgs.ac.uk/iip/britrocks.html?id=110000/119837	http://www.largeimages.bgs.ac.uk/iip/britrocks.html?id=110000/119836
398853		X								0	S1489	1489	1489	1489	Geikie,A.	*	'Original entry: Devitrified Glass'	1	Esk Glass Works slag, Musselburgh._x000D_Edinburgh (32)	Edinburgh (32)	NT 34 72			Glass slag				N	334000	672000	http://www.bgs.ac.uk/data/britrocks/britrocks.cfc?method=viewSamples&sampleId=398853	http://www.largeimages.bgs.ac.uk/iip/britrocks.html?id=110000/119839	http://www.largeimages.bgs.ac.uk/iip/britrocks.html?id=110000/119838
398854		X								0	S1490	1490	1490	1490	Geikie,A.	*	'Original entry: Devitrified Glass'	1	Esk Glass Works slag, Musselburgh._x000D_Edinburgh (32)	Edinburgh (32)	NT 34 72			Glass slag				N	334000	672000	http://www.bgs.ac.uk/data/britrocks/britrocks.cfc?method=viewSamples&sampleId=398854	http://www.largeimages.bgs.ac.uk/iip/britrocks.html?id=110000/119841	http://www.largeimages.bgs.ac.uk/iip/britrocks.html?id=110000/119840
398855		X								0	S1491	1491	1491	1491	Geikie,A.	*	'Original entry: Devitrified Glass'	1	Esk Glass Works slag, Musselburgh._x000D_Edinburgh (32)	Edinburgh (32)	NT 34 72			Glass slag				N	334000	672000	http://www.bgs.ac.uk/data/britrocks/britrocks.cfc?method=viewSamples&sampleId=398855	http://www.largeimages.bgs.ac.uk/iip/britrocks.html?id=110000/119843	http://www.largeimages.bgs.ac.uk/iip/britrocks.html?id=110000/119842
398856		X								0	S1492	1492	1492	1492	Geikie,A.	*	'Original entry: Devitrified Glass'	1	Esk Glass Works slag, Musselburgh._x000D_Edinburgh (32)	Edinburgh (32)	NT 34 72			Glass slag				N	334000	672000	http://www.bgs.ac.uk/data/britrocks/britrocks.cfc?method=viewSamples&sampleId=398856	http://www.largeimages.bgs.ac.uk/iip/britrocks.html?id=110000/119845	http://www.largeimages.bgs.ac.uk/iip/britrocks.html?id=110000/119844
398857		X								0	S1493	1493	1493	1493	Geikie,A.	*	'Original entry: Wollastonite Slag'	1	Esk Glass Works slag, Musselburgh._x000D_Edinburgh (32)	Edinburgh (32)	NT 34 72			Glass slag				N	334000	672000	http://www.bgs.ac.uk/data/britrocks/britrocks.cfc?method=viewSamples&sampleId=398857	http://www.largeimages.bgs.ac.uk/iip/britrocks.html?id=110000/119847	http://www.largeimages.bgs.ac.uk/iip/britrocks.html?id=110000/119846
398858		X								0	S1494	1494	1494	1494	Geikie,A.	*	'Original entry: Wollastonite Slag'	1	Esk Glass Works slag, Musselburgh._x000D_Edinburgh (32)	Edinburgh (32)	NT 34 72			Glass slag				N	334000	672000	http://www.bgs.ac.uk/data/britrocks/britrocks.cfc?method=viewSamples&sampleId=398858	http://www.largeimages.bgs.ac.uk/iip/britrocks.html?id=110000/119849	http://www.largeimages.bgs.ac.uk/iip/britrocks.html?id=110000/119848
398859		X								0	S1495	1495	1495	1495	Geikie,A.	*	'Original entry: Wollastonite Slag'	1	Esk Glass Works slag, Musselburgh._x000D_Edinburgh (32)	Edinburgh (32)	NT 34 72			Glass slag				N	334000	672000	http://www.bgs.ac.uk/data/britrocks/britrocks.cfc?method=viewSamples&sampleId=398859	http://www.largeimages.bgs.ac.uk/iip/britrocks.html?id=110000/119851	http://www.largeimages.bgs.ac.uk/iip/britrocks.html?id=110000/119850
398860		X								0	S1496	1496	1496	1496	Geikie,A.	*	'Original entry: Wollastonite Slag'	1	Esk Glass Works slag, Musselburgh._x000D_Edinburgh (32)	Edinburgh (32)	NT 34 72			Glass slag				N	334000	672000	http://www.bgs.ac.uk/data/britrocks/britrocks.cfc?method=viewSamples&sampleId=398860	http://www.largeimages.bgs.ac.uk/iip/britrocks.html?id=110000/119853	http://www.largeimages.bgs.ac.uk/iip/britrocks.html?id=110000/119852
398861		X								0	S1497	1497	1497	1497	Geikie,A.	*	'Original entry: Wollastonite Slag'	1	Esk Glass Works slag, Musselburgh._x000D_Edinburgh (32)	Edinburgh (32)	NT 34 72			Glass slag				N	334000	672000	http://www.bgs.ac.uk/data/britrocks/britrocks.cfc?method=viewSamples&sampleId=398861	http://www.largeimages.bgs.ac.uk/iip/britrocks.html?id=110000/119855	http://www.largeimages.bgs.ac.uk/iip/britrocks.html?id=110000/119854
398862		X								0	S1498	1498	1498	1498	Geikie,A.	*	'Original entry: Glass, Artificial F'	1	Esk Glass Works slag, Musselburgh._x000D_Edinburgh (32)	Edinburgh (32)	NT 34 72							N	334000	672000	http://www.bgs.ac.uk/data/britrocks/britrocks.cfc?method=viewSamples&sampleId=398862	http://www.largeimages.bgs.ac.uk/iip/britrocks.html?id=110000/119857	http://www.largeimages.bgs.ac.uk/iip/britrocks.html?id=110000/119856
400769		X								0	S1499 a	1499	1499	1499	Geikie,A.	*	'Original entry: Slag'	1	Railway Terminus, Port Edgar._x000D_Edinburgh (32)	Edinburgh (32)	NT 118 786			Said to be from carron iron foundary				N	311800	678600	http://www.bgs.ac.uk/data/britrocks/britrocks.cfc?method=viewSamples&sampleId=400769
398863		X								0	S1499; S1499/a; S1499/b;	1499	1499	1499	Geikie,A.	*	'Original entry: Slag F'	1	Esk Glass Works slag, Musselburgh._x000D_Edinburgh (32)	Edinburgh (32)	NT 34 72			Iron furnace slag				N	334000	672000	http://www.bgs.ac.uk/data/britrocks/britrocks.cfc?method=viewSamples&sampleId=398863	http://www.largeimages.bgs.ac.uk/iip/britrocks.html?id=110000/119859	http://www.largeimages.bgs.ac.uk/iip/britrocks.html?id=110000/119858	http://www.largeimages.bgs.ac.uk/iip/britrocks.html?id=110000/119863	http://www.largeimages.bgs.ac.uk/iip/britrocks.html?id=110000/119862	http://www.largeimages.bgs.ac.uk/iip/britrocks.html?id=110000/119861	http://www.largeimages.bgs.ac.uk/iip/britrocks.html?id=110000/119860
400770		X								0	S1500	1500	1500	1500	Geikie,A.	*	'Original entry: Slag'	1	Railway Terminus, Port Edgar._x000D_Edinburgh (32)	Edinburgh (32)	NT 118 786			Said to be from carron iron foundary				N	311800	678600	http://www.bgs.ac.uk/data/britrocks/britrocks.cfc?method=viewSamples&sampleId=400770	http://www.largeimages.bgs.ac.uk/iip/britrocks.html?id=110000/119865	http://www.largeimages.bgs.ac.uk/iip/britrocks.html?id=110000/119864
400771		X								0	S1501; S1501/A;	1501	1501	1501	Geikie,A.	*	'Original entry: Slag'	1	Railway Terminus, Port Edgar._x000D_Edinburgh (32)	Edinburgh (32)	NT 118 786			Said to be from carron iron foundary				N	311800	678600	http://www.bgs.ac.uk/data/britrocks/britrocks.cfc?method=viewSamples&sampleId=400771	http://www.largeimages.bgs.ac.uk/iip/britrocks.html?id=110000/119867	http://www.largeimages.bgs.ac.uk/iip/britrocks.html?id=110000/119866	http://www.largeimages.bgs.ac.uk/iip/britrocks.html?id=110000/119869	http://www.largeimages.bgs.ac.uk/iip/britrocks.html?id=110000/119868
400772		X								0	S1502	1502	1502	1502	Geikie,A.	*	'Original entry: Slag'	1	Railway Terminus, Port Edgar._x000D_Edinburgh (32)	Edinburgh (32)	NT 118 786			Said to be from carron iron foundary				N	311800	678600	http://www.bgs.ac.uk/data/britrocks/britrocks.cfc?method=viewSamples&sampleId=400772	http://www.largeimages.bgs.ac.uk/iip/britrocks.html?id=110000/119871	http://www.largeimages.bgs.ac.uk/iip/britrocks.html?id=110000/119870
400773		X								0	S1503; S1503/A;	1503	1503	1503	Geikie,A.	*	'Original entry: Slag'	1	Railway Terminus, Port Edgar._x000D_Edinburgh (32)	Edinburgh (32)	NT 118 786			Said to be from carron iron foundary				N	311800	678600	http://www.bgs.ac.uk/data/britrocks/britrocks.cfc?method=viewSamples&sampleId=400773	http://www.largeimages.bgs.ac.uk/iip/britrocks.html?id=110000/119873	http://www.largeimages.bgs.ac.uk/iip/britrocks.html?id=110000/119872	http://www.largeimages.bgs.ac.uk/iip/britrocks.html?id=110000/119877	http://www.largeimages.bgs.ac.uk/iip/britrocks.html?id=110000/119874
400774		X								0	S1504	1504	1504	1504	Geikie,A.	*	'Original entry: Slag'	1	Railway Terminus, Port Edgar._x000D_Edinburgh (32)	Edinburgh (32)	NT 118 786			Said to be from carron iron foundary				N	311800	678600	http://www.bgs.ac.uk/data/britrocks/britrocks.cfc?method=viewSamples&sampleId=400774	http://www.largeimages.bgs.ac.uk/iip/britrocks.html?id=110000/119876	http://www.largeimages.bgs.ac.uk/iip/britrocks.html?id=110000/119875
400775		X								0	S1505	1505	1505	1505	Geikie,A.	*	'Original entry: Slag'	1	Railway Terminus, Port Edgar._x000D_Edinburgh (32)	Edinburgh (32)	NT 118 786			Said to be from carron iron foundary				N	311800	678600	http://www.bgs.ac.uk/data/britrocks/britrocks.cfc?method=viewSamples&sampleId=400775	http://www.largeimages.bgs.ac.uk/iip/britrocks.html?id=110000/119879	http://www.largeimages.bgs.ac.uk/iip/britrocks.html?id=110000/119878
400776		X								0	S1506	1506	1506	1506	Geikie,A.	*	'Original entry: Slag'	1	Railway Terminus, Port Edgar._x000D_Edinburgh (32)	Edinburgh (32)	NT 118 786			Said to be from carron iron foundary				N	311800	678600	http://www.bgs.ac.uk/data/britrocks/britrocks.cfc?method=viewSamples&sampleId=400776	http://www.largeimages.bgs.ac.uk/iip/britrocks.html?id=110000/119881	http://www.largeimages.bgs.ac.uk/iip/britrocks.html?id=110000/119880
400777		X								0	S1507	1507	1507	1507	Geikie,A.	*	'Original entry: Slag'	1	Railway Terminus, Port Edgar._x000D_Edinburgh (32)	Edinburgh (32)	NT 118 786			Said to be from carron iron foundary				N	311800	678600	http://www.bgs.ac.uk/data/britrocks/britrocks.cfc?method=viewSamples&sampleId=400777	http://www.largeimages.bgs.ac.uk/iip/britrocks.html?id=110000/119883	http://www.largeimages.bgs.ac.uk/iip/britrocks.html?id=110000/119882
400778		X								0	S1508	1508	1508	1508	Geikie,A.	*	'Original entry: Slag'	1	Railway Terminus, Port Edgar._x000D_Edinburgh (32)	Edinburgh (32)	NT 118 786			Said to be from carron iron foundary				N	311800	678600	http://www.bgs.ac.uk/data/britrocks/britrocks.cfc?method=viewSamples&sampleId=400778	http://www.largeimages.bgs.ac.uk/iip/britrocks.html?id=110000/119885	http://www.largeimages.bgs.ac.uk/iip/britrocks.html?id=110000/119884
400779		X								0	S1509	1509	1509	1509	Geikie,A.	*	'Original entry: Slag'	1	Railway Terminus, Port Edgar._x000D_Edinburgh (32)	Edinburgh (32)	NT 118 786			Said to be from carron iron foundary				N	311800	678600	http://www.bgs.ac.uk/data/britrocks/britrocks.cfc?method=viewSamples&sampleId=400779	http://www.largeimages.bgs.ac.uk/iip/britrocks.html?id=110000/119887	http://www.largeimages.bgs.ac.uk/iip/britrocks.html?id=110000/119886
400780		X								0	S1510; S1510/a;	1510	1510	1510	Geikie,A.	*	'Original entry: Slag'	1	Railway Terminus, Port Edgar._x000D_Edinburgh (32)	Edinburgh (32)	NT 118 786			Said to be from carron iron foundary				N	311800	678600	http://www.bgs.ac.uk/data/britrocks/britrocks.cfc?method=viewSamples&sampleId=400780	http://www.largeimages.bgs.ac.uk/iip/britrocks.html?id=110000/119889	http://www.largeimages.bgs.ac.uk/iip/britrocks.html?id=110000/119888	http://www.largeimages.bgs.ac.uk/iip/britrocks.html?id=110000/119891	http://www.largeimages.bgs.ac.uk/iip/britrocks.html?id=110000/119890
400781		X								0	S1511	1511	1511	1511	Geikie,A.	*	'Original entry: Slag'	1	Railway Terminus, Port Edgar._x000D_Edinburgh (32)	Edinburgh (32)	NT 118 786			Said to be from carron iron foundary				N	311800	678600	http://www.bgs.ac.uk/data/britrocks/britrocks.cfc?method=viewSamples&sampleId=400781	http://www.largeimages.bgs.ac.uk/iip/britrocks.html?id=110000/119893	http://www.largeimages.bgs.ac.uk/iip/britrocks.html?id=110000/119892
398864		X								0	S1512	1512	1512	1512	Geikie,A.	*	'Original entry: Slag'	1	Mayfield Lime Works, 3 miles E of Dalkeith._x000D_Edinburgh (32)	Edinburgh (32)	NT 353 645			Lime-kiln slag				N	335300	664500	http://www.bgs.ac.uk/data/britrocks/britrocks.cfc?method=viewSamples&sampleId=398864	http://www.largeimages.bgs.ac.uk/iip/britrocks.html?id=110000/119895	http://www.largeimages.bgs.ac.uk/iip/britrocks.html?id=110000/119894
394922							X			0	S1636	1636	1636	1636	Geikie,A.	*	'Original entry: Slag'	1	Kaim, Lochwinnock._x000D_Glasgow (30)	Glasgow (30)	NS 3525 6148							N	235250	661480	http://www.bgs.ac.uk/data/britrocks/britrocks.cfc?method=viewSamples&sampleId=394922	http://www.largeimages.bgs.ac.uk/iip/britrocks.html?id=120000/120629	http://www.largeimages.bgs.ac.uk/iip/britrocks.html?id=120000/120628
384088						X				0	S1651	1651	1651	1651	Geikie,A.	*	'Original entry: Basalt'	1	Yellow Man, shore E of North Berwick._x000D_SCOTLAND._x000D_North Berwick (41)	North Berwick (41)	NT 5778 8574	SCOTLAND						N	357780	685740	http://www.bgs.ac.uk/data/britrocks/britrocks.cfc?method=viewSamples&sampleId=384088	http://www.largeimages.bgs.ac.uk/iip/britrocks.html?id=120000/120653	http://www.largeimages.bgs.ac.uk/iip/britrocks.html?id=120000/120652
384089						X				0	S1652	1652	1652	1652	Geikie,A.	*	'Original entry: Dolerite'	1	Cliff on E side of North Berwick harbour._x000D_SCOTLAND._x000D_North Berwick (41)	North Berwick (41)	NT 5544 8569	SCOTLAND		Dunsapie type; lava bed, forming cliff				N	355440	685690	http://www.bgs.ac.uk/data/britrocks/britrocks.cfc?method=viewSamples&sampleId=384089	http://www.largeimages.bgs.ac.uk/iip/britrocks.html?id=120000/120655	http://www.largeimages.bgs.ac.uk/iip/britrocks.html?id=120000/120654
394923							X			0	S1653	1653	1653	1653	Geikie,A.	*	'Original entry: Stigmaria Ficoides'	1	Glenarbuck, above Bowling._x000D_Glasgow (30)	Glasgow (30)	NS 441 749			From tuff under porphyrite				N	244100	674900	http://www.bgs.ac.uk/data/britrocks/britrocks.cfc?method=viewSamples&sampleId=394923	http://www.largeimages.bgs.ac.uk/iip/britrocks.html?id=120000/120657	http://www.largeimages.bgs.ac.uk/iip/britrocks.html?id=120000/120656
398868		X								0	S1665	1665	1665	1665	Geikie,A.	*	'Original entry: White Trap F'	1	Port Edgar. 0.75 mile W of Queensferry._x000D_Edinburgh (32)	Edinburgh (32)	NT 1182 7862			Probably an altered sandstone. diabase f				N	311820	678620	http://www.bgs.ac.uk/data/britrocks/britrocks.cfc?method=viewSamples&sampleId=398868	http://www.largeimages.bgs.ac.uk/iip/britrocks.html?id=120000/120683	http://www.largeimages.bgs.ac.uk/iip/britrocks.html?id=120000/120682
383134						X				0	S1666	1666	1666	1666	Geikie,A.	*	'Original entry: Olivine-Basalt'	1	Shore W of Kinghorn._x000D_SCOTLAND._x000D_Kinross (40)	Kinross (40)	NT 2538 8636	SCOTLAND		Columnar basalt				N	325380	686360	http://www.bgs.ac.uk/data/britrocks/britrocks.cfc?method=viewSamples&sampleId=383134	http://www.largeimages.bgs.ac.uk/iip/britrocks.html?id=120000/120685	http://www.largeimages.bgs.ac.uk/iip/britrocks.html?id=120000/120684
400782										0	S1667	1667	1667	1667	Geikie,A.	*	'Original entry: Dolerite'	1	Raven Craig, Bathgate Hills._x000D_Airdrie (31)	Airdrie (31)	NS 9905 7067			Neck				N	299050	670670	http://www.bgs.ac.uk/data/britrocks/britrocks.cfc?method=viewSamples&sampleId=400782	http://www.largeimages.bgs.ac.uk/iip/britrocks.html?id=120000/120687	http://www.largeimages.bgs.ac.uk/iip/britrocks.html?id=120000/120686
400783										0	S1668	1668	1668	1668	Geikie,A.	*	'Original entry: Basalt'	1	E of Petershill Quarry, Bathgate._x000D_Airdrie (31)	Airdrie (31)	NS 979 709			Tholeiite type h. big neck.				N	297900	670900	http://www.bgs.ac.uk/data/britrocks/britrocks.cfc?method=viewSamples&sampleId=400783	http://www.largeimages.bgs.ac.uk/iip/britrocks.html?id=120000/120689	http://www.largeimages.bgs.ac.uk/iip/britrocks.html?id=120000/120688
400784										0	S1669	1669	1669	1669	Geikie,A.	*	'Original entry: Dolerite'	1	NE of Petershill Quarry, Bathgate._x000D_Airdrie (31)	Airdrie (31)	NS 9895 6987			Rock w side of limestone enclosed within "neck"				N	298950	669870	http://www.bgs.ac.uk/data/britrocks/britrocks.cfc?method=viewSamples&sampleId=400784	http://www.largeimages.bgs.ac.uk/iip/britrocks.html?id=120000/120691	http://www.largeimages.bgs.ac.uk/iip/britrocks.html?id=120000/120690
398869		X								0	S1670; S1670/a; S1670/b;	1670	1670	1670	Geikie,A.	*	'Original entry: Picrite (Porphyrite) F'	1	Hill House Quarry, Linlithgow._x000D_Edinburgh (32)	Edinburgh (32)	NT 0040 7477			2 slides, a & b; hillhouse type - columnar; edinburgh memoir, 1910, pp. 316, 320 and plate xii, fig. 6.				N	300400	674770	http://www.bgs.ac.uk/data/britrocks/britrocks.cfc?method=viewSamples&sampleId=398869	http://www.largeimages.bgs.ac.uk/iip/britrocks.html?id=120000/120693	http://www.largeimages.bgs.ac.uk/iip/britrocks.html?id=120000/120692	http://www.largeimages.bgs.ac.uk/iip/britrocks.html?id=120000/120695	http://www.largeimages.bgs.ac.uk/iip/britrocks.html?id=120000/120694
400786										0	S1671 a	1671	1671	1671	Geikie,A.	*	'Original entry: Ashy Limestone'	1	East quarry, Kirkton, Bathgate._x000D_Airdrie (31)	Airdrie (31)	NS 990 690			"tuff"				N	299000	669000	http://www.bgs.ac.uk/data/britrocks/britrocks.cfc?method=viewSamples&sampleId=400786
400785										0	S1671; S1671/a; S1671/b;	1671	1671	1671	Geikie,A.	*	'Original entry: Dolerite'	1	Knock Hill, Bathgate Hills._x000D_Airdrie (31)	Airdrie (31)	NS 9925 7100			Ew dyke (tertiary)				N	299250	671000	http://www.bgs.ac.uk/data/britrocks/britrocks.cfc?method=viewSamples&sampleId=400785	http://www.largeimages.bgs.ac.uk/iip/britrocks.html?id=120000/120697	http://www.largeimages.bgs.ac.uk/iip/britrocks.html?id=120000/120696	http://www.largeimages.bgs.ac.uk/iip/britrocks.html?id=120000/120699	http://www.largeimages.bgs.ac.uk/iip/britrocks.html?id=120000/120698	http://www.largeimages.bgs.ac.uk/iip/britrocks.html?id=120000/120701	http://www.largeimages.bgs.ac.uk/iip/britrocks.html?id=120000/120700
400787										0	S1672	1672	1672	1672	Geikie,A.	*	'Original entry: Ashy Limestone'	1	Gala Brae quarry, Bathgate Hills._x000D_Airdrie (31)	Airdrie (31)	NS 984 703			Tuff filling hole in limestone				N	298400	670300	http://www.bgs.ac.uk/data/britrocks/britrocks.cfc?method=viewSamples&sampleId=400787	http://www.largeimages.bgs.ac.uk/iip/britrocks.html?id=120000/120703	http://www.largeimages.bgs.ac.uk/iip/britrocks.html?id=120000/120702
398870		X								0	S1673	1673	1673	1673	Geikie,A.	*	'Original entry: Tuff (Calcareous) W'	1	St Magdalene's._x000D_Edinburgh (32)	Edinburgh (32)	NT 015 770							N	301500	677000	http://www.bgs.ac.uk/data/britrocks/britrocks.cfc?method=viewSamples&sampleId=398870	http://www.largeimages.bgs.ac.uk/iip/britrocks.html?id=120000/120705	http://www.largeimages.bgs.ac.uk/iip/britrocks.html?id=120000/120704
398871		X								0	S1674	1674	1674	1674	Geikie,A.	*	'Original entry: Tuff (Calcareous) W'	1	St Magdalene's Quarry._x000D_Edinburgh (32)	Edinburgh (32)	NT 0127 7698			"dyke in tuff"				N	301270	676980	http://www.bgs.ac.uk/data/britrocks/britrocks.cfc?method=viewSamples&sampleId=398871	http://www.largeimages.bgs.ac.uk/iip/britrocks.html?id=120000/120707	http://www.largeimages.bgs.ac.uk/iip/britrocks.html?id=120000/120706
398872		X								0	S1675	1675	1675	1675	Geikie,A.	*	'Original entry: Tuff (Calcareous) W'	1	St Magdalene's Quarry._x000D_Edinburgh (32)	Edinburgh (32)	NT 0125 7700							N	301250	677000	http://www.bgs.ac.uk/data/britrocks/britrocks.cfc?method=viewSamples&sampleId=398872	http://www.largeimages.bgs.ac.uk/iip/britrocks.html?id=120000/120709	http://www.largeimages.bgs.ac.uk/iip/britrocks.html?id=120000/120708
398873		X								0	S1676	1676	1676	1676	Geikie,A.	*	'Original entry: Tuff (Calcareous) W'	1	St Magdalene's Quarry._x000D_Edinburgh (32)	Edinburgh (32)	NT 0125 7700							N	301250	677000	http://www.bgs.ac.uk/data/britrocks/britrocks.cfc?method=viewSamples&sampleId=398873	http://www.largeimages.bgs.ac.uk/iip/britrocks.html?id=120000/120711	http://www.largeimages.bgs.ac.uk/iip/britrocks.html?id=120000/120710
398874		X								0	S1677	1677	1677	1677	Geikie,A.	*	'Original entry: Tuff (Calcareous) W'	1	St Magdalene's Quarry._x000D_Edinburgh (32)	Edinburgh (32)	NT 0125 7700							N	301250	677000	http://www.bgs.ac.uk/data/britrocks/britrocks.cfc?method=viewSamples&sampleId=398874	http://www.largeimages.bgs.ac.uk/iip/britrocks.html?id=120000/120713	http://www.largeimages.bgs.ac.uk/iip/britrocks.html?id=120000/120712
400788										0	S1678	1678	1678	1678	Geikie,A.	*	'Original entry: Cherty Limestone'	1	East quarry, Kirkton, Bathgate._x000D_Airdrie (31)	Airdrie (31)	NS 990 690			Banded				N	299000	669000	http://www.bgs.ac.uk/data/britrocks/britrocks.cfc?method=viewSamples&sampleId=400788	http://www.largeimages.bgs.ac.uk/iip/britrocks.html?id=120000/120715	http://www.largeimages.bgs.ac.uk/iip/britrocks.html?id=120000/120714
400789										0	S1679	1679	1679	1679	Geikie,A.	*	'Original entry: Cherty Limestone'	1	East quarry, Kirkton, Bathgate._x000D_Airdrie (31)	Airdrie (31)	NS 990 690			Banded				N	299000	669000	http://www.bgs.ac.uk/data/britrocks/britrocks.cfc?method=viewSamples&sampleId=400789	http://www.largeimages.bgs.ac.uk/iip/britrocks.html?id=120000/120717	http://www.largeimages.bgs.ac.uk/iip/britrocks.html?id=120000/120716
400790										0	S1680	1680	1680	1680	Geikie,A.	*	'Original entry: Cherty Limestone'	1	Wardlaw Quary, Bathgate Hills._x000D_Airdrie (31)	Airdrie (31)	NS 995 731			Chert enclosing lithostrotion				N	299500	673100	http://www.bgs.ac.uk/data/britrocks/britrocks.cfc?method=viewSamples&sampleId=400790	http://www.largeimages.bgs.ac.uk/iip/britrocks.html?id=120000/120719	http://www.largeimages.bgs.ac.uk/iip/britrocks.html?id=120000/120718
400791										0	S1681	1681	1681	1681	Geikie,A.	*	'Original entry: Cherty Limestone'	1	Bathgate._x000D_Airdrie (31)	Airdrie (31)	NS 98 70							N	298000	670000	http://www.bgs.ac.uk/data/britrocks/britrocks.cfc?method=viewSamples&sampleId=400791	http://www.largeimages.bgs.ac.uk/iip/britrocks.html?id=120000/120721	http://www.largeimages.bgs.ac.uk/iip/britrocks.html?id=120000/120720
378122				X						0	S1694	1694	1694	1694	Geikie,A.	*	'Original entry: Tholeiite'	1	Below Kelly House, Wemyss Bay._x000D_SCOTLAND._x000D_Rothesay (29)	Rothesay (29)	NS 1934 6883	SCOTLAND		Tholeiite, dyke n side of no. 1 dyke				N	219340	668830	http://www.bgs.ac.uk/data/britrocks/britrocks.cfc?method=viewSamples&sampleId=378122	http://www.largeimages.bgs.ac.uk/iip/britrocks.html?id=120000/120753	http://www.largeimages.bgs.ac.uk/iip/britrocks.html?id=120000/120752
378123				X						0	S1695	1695	1695	1695	Geikie,A.	*	'Original entry: Tholeiite'	1	Near Wemyss Bay Railway Station._x000D_SCOTLAND._x000D_Rothesay (29)	Rothesay (29)	NS 193 684	SCOTLAND		Tholeiite, dyke n side, near sandstone				N	219300	668400	http://www.bgs.ac.uk/data/britrocks/britrocks.cfc?method=viewSamples&sampleId=378123	http://www.largeimages.bgs.ac.uk/iip/britrocks.html?id=120000/120755	http://www.largeimages.bgs.ac.uk/iip/britrocks.html?id=120000/120754
378124				X						0	S1696	1696	1696	1696	Geikie,A.	*	'Original entry: Tholeiite'	1	Near Wemyss Bay Railway Station._x000D_SCOTLAND._x000D_Rothesay (29)	Rothesay (29)	NS 193 684	SCOTLAND		Tholeiite, dyke s side, near sandstone				N	219300	668400	http://www.bgs.ac.uk/data/britrocks/britrocks.cfc?method=viewSamples&sampleId=378124	http://www.largeimages.bgs.ac.uk/iip/britrocks.html?id=120000/120757	http://www.largeimages.bgs.ac.uk/iip/britrocks.html?id=120000/120756
378125				X						0	S1697	1697	1697	1697	Geikie,A.	*	'Original entry: Altered Grit'	1	Below Kelly House, Wemyss Bay._x000D_SCOTLAND._x000D_Rothesay (29)	Rothesay (29)	NS 193 688	SCOTLAND		Altered grit, altered sandstone in dyke no. 1				N	219300	668800	http://www.bgs.ac.uk/data/britrocks/britrocks.cfc?method=viewSamples&sampleId=378125	http://www.largeimages.bgs.ac.uk/iip/britrocks.html?id=120000/120759	http://www.largeimages.bgs.ac.uk/iip/britrocks.html?id=120000/120758
378126				X						0	S1698	1698	1698	1698	Geikie,A.	*	'Original entry: Altered Grit'	1	Below Kelly House, Wemyss Bay._x000D_SCOTLAND._x000D_Rothesay (29)	Rothesay (29)	NS 193 688	SCOTLAND		Altered grit, altered sandstone in dyke no. 2				N	219300	668800	http://www.bgs.ac.uk/data/britrocks/britrocks.cfc?method=viewSamples&sampleId=378126	http://www.largeimages.bgs.ac.uk/iip/britrocks.html?id=120000/120761	http://www.largeimages.bgs.ac.uk/iip/britrocks.html?id=120000/120760
378127				X						0	S1699	1699	1699	1699	Geikie,A.	*	'Original entry: Like Devitrified Glass'	1	Kelly House, Wemyss Bay._x000D_SCOTLAND._x000D_Rothesay (29)	Rothesay (29)	NS 1934 6883	SCOTLAND		Like devitrified glass, kernal in dyke no. 1				N	219340	668830	http://www.bgs.ac.uk/data/britrocks/britrocks.cfc?method=viewSamples&sampleId=378127	http://www.largeimages.bgs.ac.uk/iip/britrocks.html?id=120000/120763	http://www.largeimages.bgs.ac.uk/iip/britrocks.html?id=120000/120762
377989				X						0	S1700	1700	1700	1700	Geikie,A.	*	'Original entry: Like Devitrified Glass'	1	Kelly House, Wemyss Bay._x000D_SCOTLAND._x000D_Rothesay (29)	Rothesay (29)	NS 1934 6883	SCOTLAND		Like devitrified glass, kernal in dyke no. 1				N	219340	668830	http://www.bgs.ac.uk/data/britrocks/britrocks.cfc?method=viewSamples&sampleId=377989	http://www.largeimages.bgs.ac.uk/iip/britrocks.html?id=120000/120765	http://www.largeimages.bgs.ac.uk/iip/britrocks.html?id=120000/120764
378128				X						0	S1701/1	1701	1701	1701	Geikie,A.	*	'Original entry: Tachylite'	1	Near railway station, Wemyss Bay._x000D_SCOTLAND._x000D_Rothesay (29)	Rothesay (29)	NS 1934 6883	SCOTLAND		Tachylite, dyke with portion of glass vein				N	219340	668830	http://www.bgs.ac.uk/data/britrocks/britrocks.cfc?method=viewSamples&sampleId=378128
378129				X						0	S1701/a	1701	1701	1701	Geikie,A.	*	'Original entry: Tachylite'	1	Near railway station, Wemyss Bay._x000D_SCOTLAND._x000D_Rothesay (29)	Rothesay (29)	NS 1934 6883	SCOTLAND		Tachylite, dyke with portion of glass vein				N	219340	668830	http://www.bgs.ac.uk/data/britrocks/britrocks.cfc?method=viewSamples&sampleId=378129	http://www.largeimages.bgs.ac.uk/iip/britrocks.html?id=120000/120769	http://www.largeimages.bgs.ac.uk/iip/britrocks.html?id=120000/120768
378130				X						0	S1701/b	1701	1701	1701	Geikie,A.	*	'Original entry: Tachylite'	1	Near railway station, Wemyss Bay._x000D_SCOTLAND._x000D_Rothesay (29)	Rothesay (29)	NS 1934 6883	SCOTLAND		Tachylite, dyke with vitreous edge				N	219340	668830	http://www.bgs.ac.uk/data/britrocks/britrocks.cfc?method=viewSamples&sampleId=378130	http://www.largeimages.bgs.ac.uk/iip/britrocks.html?id=120000/120771	http://www.largeimages.bgs.ac.uk/iip/britrocks.html?id=120000/120770
378131				X						0	S1702/1	1702	1702	1702	Geikie,A.	*	'Original entry: Tachylite'	1	Near railway station, Wemyss Bay._x000D_SCOTLAND._x000D_Rothesay (29)	Rothesay (29)	NS 1934 6883	SCOTLAND		Tachylite, dyke with pure glass				N	219340	668830	http://www.bgs.ac.uk/data/britrocks/britrocks.cfc?method=viewSamples&sampleId=378131
378132				X						0	S1702/a	1702	1702	1702	Geikie,A.	*	'Original entry: Tachylite'	1	Near railway station, Wemyss Bay._x000D_SCOTLAND._x000D_Rothesay (29)	Rothesay (29)	NS 1934 6883	SCOTLAND		Tachylite, dyke with pure glass				N	219340	668830	http://www.bgs.ac.uk/data/britrocks/britrocks.cfc?method=viewSamples&sampleId=378132	http://www.largeimages.bgs.ac.uk/iip/britrocks.html?id=120000/120775	http://www.largeimages.bgs.ac.uk/iip/britrocks.html?id=120000/120774
377990				X						0	S1702/b	1702	1702	1702	Geikie,A.	*	'Original entry: Tachylite'	1	Near railway station, Wemyss Bay._x000D_SCOTLAND._x000D_Rothesay (29)	Rothesay (29)	NS 1934 6883	SCOTLAND		Tachylite, dyke with vitreous layer				N	219340	668830	http://www.bgs.ac.uk/data/britrocks/britrocks.cfc?method=viewSamples&sampleId=377990	http://www.largeimages.bgs.ac.uk/iip/britrocks.html?id=120000/120777	http://www.largeimages.bgs.ac.uk/iip/britrocks.html?id=120000/120776
398970		X								0	S1708	1708	1708	1708	Geikie,A.	*	'Original entry: Altered Limestone W'	1	Camps Quarry, Mid Calder._x000D_Edinburgh (32)	Edinburgh (32)	NT 0957 6825			Next dyke				N	309570	668250	http://www.bgs.ac.uk/data/britrocks/britrocks.cfc?method=viewSamples&sampleId=398970	http://www.largeimages.bgs.ac.uk/iip/britrocks.html?id=120000/120787	http://www.largeimages.bgs.ac.uk/iip/britrocks.html?id=120000/120786
398971		X								0	S1709	1709	1709	1709	Geikie,A.	*	'Original entry: Limestone W'	1	Selms, Kirknewton._x000D_Edinburgh (32)	Edinburgh (32)	NT 084 661			Limestone (lr calciferous sandstone)				N	308400	666100	http://www.bgs.ac.uk/data/britrocks/britrocks.cfc?method=viewSamples&sampleId=398971	http://www.largeimages.bgs.ac.uk/iip/britrocks.html?id=120000/120789	http://www.largeimages.bgs.ac.uk/iip/britrocks.html?id=120000/120788
398972		X								0	S1710	1710	1710	1710	Geikie,A.	*	'Original entry: Chilled Edge Of A ?Basaltic Dyke F'	1	Camps Quarry, Mid Calder._x000D_Edinburgh (32)	Edinburgh (32)	NT 105 681			Dyke altering limestone				N	310500	668100	http://www.bgs.ac.uk/data/britrocks/britrocks.cfc?method=viewSamples&sampleId=398972	http://www.largeimages.bgs.ac.uk/iip/britrocks.html?id=120000/120791	http://www.largeimages.bgs.ac.uk/iip/britrocks.html?id=120000/120790
398973		X								0	S1711	1711	1711	1711	Geikie,A.	*	'Original entry: Dolerite F'	1	Below Contentibus, Linhouse Water._x000D_Edinburgh (32)	Edinburgh (32)	NT 077 656			Intrusion in shales				N	307700	665600	http://www.bgs.ac.uk/data/britrocks/britrocks.cfc?method=viewSamples&sampleId=398973	http://www.largeimages.bgs.ac.uk/iip/britrocks.html?id=120000/120793	http://www.largeimages.bgs.ac.uk/iip/britrocks.html?id=120000/120792
398974		X								0	S1712	1712	1712	1712	Geikie,A.	*	'Original entry: Quartz Dolerite F'	1	Below Contentibus, Linhouse Water._x000D_Edinburgh (32)	Edinburgh (32)	NT 077 656			Intrusion in shales				N	307700	665600	http://www.bgs.ac.uk/data/britrocks/britrocks.cfc?method=viewSamples&sampleId=398974	http://www.largeimages.bgs.ac.uk/iip/britrocks.html?id=120000/120795	http://www.largeimages.bgs.ac.uk/iip/britrocks.html?id=120000/120794
375035				X						0	S1716	1716	1716	1716	Geikie,A.	*	'Original entry: Microgranite And Biotite Gneiss'	1	Side of Goat Fell._x000D_SCOTLAND._x000D_Arran (Millport) (21)	Arran (Millport) (21)	NR 990 410	SCOTLAND		Microgranite and biotite gneiss				N	199000	641000	http://www.bgs.ac.uk/data/britrocks/britrocks.cfc?method=viewSamples&sampleId=375035	http://www.largeimages.bgs.ac.uk/iip/britrocks.html?id=120000/120803	http://www.largeimages.bgs.ac.uk/iip/britrocks.html?id=120000/120802
398978		X								0	S1717	1717	1717	1717	Geikie,A.	*	'Original entry: Olivine Basalt F'	1	On road from Greenside Church, N side of Calton Hill._x000D_Edinburgh (32)	Edinburgh (32)	NT 263 744			Doubtful type f				N	326300	674400	http://www.bgs.ac.uk/data/britrocks/britrocks.cfc?method=viewSamples&sampleId=398978	http://www.largeimages.bgs.ac.uk/iip/britrocks.html?id=120000/120805	http://www.largeimages.bgs.ac.uk/iip/britrocks.html?id=120000/120804
398979		X								0	S1723	1723	1723	1723	Geikie,A.	*	'Original entry: Picrite F'	1	Cliff on E side of landing place, Inchcolm._x000D_Edinburgh (32)	Edinburgh (32)	NT 1913 8268			(feldspathic)				N	319130	682680	http://www.bgs.ac.uk/data/britrocks/britrocks.cfc?method=viewSamples&sampleId=398979	http://www.largeimages.bgs.ac.uk/iip/britrocks.html?id=120000/120817	http://www.largeimages.bgs.ac.uk/iip/britrocks.html?id=120000/120816
398980		X								0	S1724	1724	1724	1724	Geikie,A.	*	'Original entry: Teschenite, Decomposed F'	1	Cliff on E side of landing place, Inchcolm._x000D_Edinburgh (32)	Edinburgh (32)	NT 1913 8268			From base of s 1723				N	319130	682680	http://www.bgs.ac.uk/data/britrocks/britrocks.cfc?method=viewSamples&sampleId=398980	http://www.largeimages.bgs.ac.uk/iip/britrocks.html?id=120000/120819	http://www.largeimages.bgs.ac.uk/iip/britrocks.html?id=120000/120818
398981		X								0	S1725	1725	1725	1725	Geikie,A.	*	'Original entry: Rotten Basalt In Marmarised Limestone F'	1	Raw Camps Quarry, near East Calder._x000D_Edinburgh (32)	Edinburgh (32)	NT 102 683							N	310200	668300	http://www.bgs.ac.uk/data/britrocks/britrocks.cfc?method=viewSamples&sampleId=398981	http://www.largeimages.bgs.ac.uk/iip/britrocks.html?id=120000/120821	http://www.largeimages.bgs.ac.uk/iip/britrocks.html?id=120000/120820
398982		X								0	S1726	1726	1726	1726	Geikie,A.	*	'Original entry: Marble F'	1	From tombstone, Cannongate Churchyard._x000D_Edinburgh (32)	Edinburgh (32)	NT 2642 7386			Proc. roy. soc. edinb., 1880, vol. 10, pp. 520, 524				N	326420	673860	http://www.bgs.ac.uk/data/britrocks/britrocks.cfc?method=viewSamples&sampleId=398982	http://www.largeimages.bgs.ac.uk/iip/britrocks.html?id=120000/120823	http://www.largeimages.bgs.ac.uk/iip/britrocks.html?id=120000/120822
398983		X								0	S1727	1727	1727	1727	Geikie,A.	*	'Original entry: Felsite Or Rhyolite? F'	1	Pentland Hills (?Bell's Hill DG)._x000D_Edinburgh (32)	Edinburgh (32)	NT 201 643			O.r.s. (much silicified f; cf. s. 7868				N	320100	664300	http://www.bgs.ac.uk/data/britrocks/britrocks.cfc?method=viewSamples&sampleId=398983	http://www.largeimages.bgs.ac.uk/iip/britrocks.html?id=120000/120825	http://www.largeimages.bgs.ac.uk/iip/britrocks.html?id=120000/120824
266598								X		0	S1733	1733	1733	1733	Geikie,A.	*	'Original entry: Quartzite'	1	Strath Kanaird._x000D_SCOTLAND._x000D_Ullapool (101)	Ullapool (101)	NC 148 026	SCOTLAND		With annelid tubes				N	214800	902600	http://www.bgs.ac.uk/data/britrocks/britrocks.cfc?method=viewSamples&sampleId=266598	http://www.largeimages.bgs.ac.uk/iip/britrocks.html?id=120000/120835	http://www.largeimages.bgs.ac.uk/iip/britrocks.html?id=120000/120834
266599								X		0	S1734	1734	1734	1734	Geikie,A.	*	'Original entry: Limestone (Quartzose)'	1	S of Ullapool._x000D_SCOTLAND._x000D_Ullapool (101)	Ullapool (101)	NH 134 945	SCOTLAND						N	213400	894500	http://www.bgs.ac.uk/data/britrocks/britrocks.cfc?method=viewSamples&sampleId=266599	http://www.largeimages.bgs.ac.uk/iip/britrocks.html?id=120000/120837	http://www.largeimages.bgs.ac.uk/iip/britrocks.html?id=120000/120836
231110								X		2	S1735; COLLNORYF1495;	1735	1735	1735	Geikie,A.	*	'Original entry: Limestone'	1	2 miles N of Inchnadamph._x000D_SCOTLAND._x000D_Lochinver (107)	Lochinver (107)	NC 24 25	SCOTLAND		Durness limestone (crystalline)				N	224000	925000	http://www.bgs.ac.uk/data/britrocks/britrocks.cfc?method=viewSamples&sampleId=231110	http://www.largeimages.bgs.ac.uk/iip/britrocks.html?id=120000/120839	http://www.largeimages.bgs.ac.uk/iip/britrocks.html?id=120000/120838
231111								X		2	S1736; COLLNORYF1496;	1736	1736	1736	Geikie,A.	*	'Original entry: Limestone'	1	2 miles N of Inchnadamph._x000D_SCOTLAND._x000D_Lochinver (107)	Lochinver (107)	NC 24 25	SCOTLAND		Durness limestone				N	224000	925000	http://www.bgs.ac.uk/data/britrocks/britrocks.cfc?method=viewSamples&sampleId=231111	http://www.largeimages.bgs.ac.uk/iip/britrocks.html?id=120000/120841	http://www.largeimages.bgs.ac.uk/iip/britrocks.html?id=120000/120840
266600								X		0	S1737	1737	1737	1737	Geikie,A.	*	'Original entry: Vogesite'	1	Elphin._x000D_SCOTLAND._x000D_Ullapool (101)	Ullapool (101)	NC 21 11	SCOTLAND		Intrusive in limestone				N	221000	911000	http://www.bgs.ac.uk/data/britrocks/britrocks.cfc?method=viewSamples&sampleId=266600	http://www.largeimages.bgs.ac.uk/iip/britrocks.html?id=120000/120843	http://www.largeimages.bgs.ac.uk/iip/britrocks.html?id=120000/120842
266601								X		0	S1738	1738	1738	1738	Geikie,A.	*	'Original entry: Quartz-Syenite'	1	Cnoc na Sroine, N of Elphin._x000D_SCOTLAND._x000D_Ullapool (101)	Ullapool (101)	NC 25 13	SCOTLAND						N	225000	913000	http://www.bgs.ac.uk/data/britrocks/britrocks.cfc?method=viewSamples&sampleId=266601	http://www.largeimages.bgs.ac.uk/iip/britrocks.html?id=120000/120845	http://www.largeimages.bgs.ac.uk/iip/britrocks.html?id=120000/120844
231112								X		2	S1739; COLLNORYF1497;	1739	1739	1739	Geikie,A.	*	'Original entry: Oligoclase-Biotite Porphyry'	1	S end of Loch Assynt._x000D_SCOTLAND._x000D_Lochinver (107)	Lochinver (107)	NC 240 219	SCOTLAND		Canisp porphyry				N	224000	921900	http://www.bgs.ac.uk/data/britrocks/britrocks.cfc?method=viewSamples&sampleId=231112	http://www.largeimages.bgs.ac.uk/iip/britrocks.html?id=120000/120847	http://www.largeimages.bgs.ac.uk/iip/britrocks.html?id=120000/120846
283101										0	S1740	1740	1740	1740	Geikie,A.	*	'Original entry: Augen Gneiss: Crushed Gneiss?'	1	7 miles N of Garve._x000D_SCOTLAND._x000D_Alness (93)	Alness (93)	NH 393 696	SCOTLAND		Cataclastic				N	239300	869600	http://www.bgs.ac.uk/data/britrocks/britrocks.cfc?method=viewSamples&sampleId=283101	http://www.largeimages.bgs.ac.uk/iip/britrocks.html?id=120000/120849	http://www.largeimages.bgs.ac.uk/iip/britrocks.html?id=120000/120848
283102										0	S1741	1741	1741	1741	Geikie,A.	*	'Original entry: Augen Gneiss: Biotite Gneiss?'	1	7 miles N of Garve._x000D_SCOTLAND._x000D_Alness (93)	Alness (93)	NH 393 696	SCOTLAND		Cataclastic and epidotic				N	239300	869600	http://www.bgs.ac.uk/data/britrocks/britrocks.cfc?method=viewSamples&sampleId=283102	http://www.largeimages.bgs.ac.uk/iip/britrocks.html?id=120000/121097	http://www.largeimages.bgs.ac.uk/iip/britrocks.html?id=120000/121096
234076										0	S1742	1742	1742	1742	Geikie,A.	*		0	S end of Loch More._x000D_SCOTLAND._x000D_Altnaharra (108)	Altnaharra (108)	NC 35 35	SCOTLAND		Flagstones, upper series. moine				N	235000	935000	http://www.bgs.ac.uk/data/britrocks/britrocks.cfc?method=viewSamples&sampleId=234076	http://www.largeimages.bgs.ac.uk/iip/britrocks.html?id=120000/121099	http://www.largeimages.bgs.ac.uk/iip/britrocks.html?id=120000/121098
283103										0	S1743	1743	1743	1743	Geikie,A.	*	'Original entry: Quartz-Feldspar Granulite: Gneiss?'	1	River bed 1.5 mile N of Garve._x000D_SCOTLAND._x000D_Alness (93)	Alness (93)	NH 398 632	SCOTLAND		Two micas				N	239800	863200	http://www.bgs.ac.uk/data/britrocks/britrocks.cfc?method=viewSamples&sampleId=283103	http://www.largeimages.bgs.ac.uk/iip/britrocks.html?id=120000/121101	http://www.largeimages.bgs.ac.uk/iip/britrocks.html?id=120000/121100
277178										0	S1744; S1744/a;	1744	1744	1744	Geikie,A.	*	'Original entry: Biotite Granite'	1	Peterhead._x000D_SCOTLAND._x000D_Peterhead (87)	Peterhead (87)	NK 12 46	SCOTLAND						N	412000	846000	http://www.bgs.ac.uk/data/britrocks/britrocks.cfc?method=viewSamples&sampleId=277178	http://www.largeimages.bgs.ac.uk/iip/britrocks.html?id=120000/121103	http://www.largeimages.bgs.ac.uk/iip/britrocks.html?id=120000/121102	http://www.largeimages.bgs.ac.uk/iip/britrocks.html?id=120000/121105	http://www.largeimages.bgs.ac.uk/iip/britrocks.html?id=120000/121104
284867										0	S1745	1745	1745	1745	Geikie,A.	*	'Original entry: Muscovite-Biotite Granite'	1	Tollohill, 3 miles W of S of Aberdeen._x000D_SCOTLAND._x000D_Aberdeen (77)	Aberdeen (77)	NJ 923 023	SCOTLAND						C	392300	802300	http://www.bgs.ac.uk/data/britrocks/britrocks.cfc?method=viewSamples&sampleId=284867	http://www.largeimages.bgs.ac.uk/iip/britrocks.html?id=120000/121107	http://www.largeimages.bgs.ac.uk/iip/britrocks.html?id=120000/121106
284868										0	S1746	1746	1746	1746	Geikie,A.	*	'Original entry: Muscovite-Biotite Granite'	1	Rubislaw Quarry, SW Aberdeen._x000D_SCOTLAND._x000D_Aberdeen (77)	Aberdeen (77)	NJ 911 054	SCOTLAND		Microcline				C	391100	805400	http://www.bgs.ac.uk/data/britrocks/britrocks.cfc?method=viewSamples&sampleId=284868	http://www.largeimages.bgs.ac.uk/iip/britrocks.html?id=120000/121109	http://www.largeimages.bgs.ac.uk/iip/britrocks.html?id=120000/121108
284869										0	S1747	1747	1747	1747	Geikie,A.	*	'Original entry: Schistose Granite'	1	Rubislaw Quarry, SW Aberdeen._x000D_SCOTLAND._x000D_Aberdeen (77)	Aberdeen (77)	NJ 911 054	SCOTLAND		Fine cataclastic structure				C	391100	805400	http://www.bgs.ac.uk/data/britrocks/britrocks.cfc?method=viewSamples&sampleId=284869	http://www.largeimages.bgs.ac.uk/iip/britrocks.html?id=120000/121111	http://www.largeimages.bgs.ac.uk/iip/britrocks.html?id=120000/121110
284870										0	S1748	1748	1748	1748	Geikie,A.	*	'Original entry: Schistose Granite'	1	Rubislaw Quarry, SW Aberdeen._x000D_SCOTLAND._x000D_Aberdeen (77)	Aberdeen (77)	NJ 911 054	SCOTLAND		Fine cataclastic structure (fluxion)				C	391100	805400	http://www.bgs.ac.uk/data/britrocks/britrocks.cfc?method=viewSamples&sampleId=284870	http://www.largeimages.bgs.ac.uk/iip/britrocks.html?id=120000/121113	http://www.largeimages.bgs.ac.uk/iip/britrocks.html?id=120000/121112
284871										0	S1749	1749	1749	1749	Geikie,A.	*	'Original entry: Muscovite-Biotite Granite'	1	Stoneyhill 3 miles S of Aberdeen._x000D_SCOTLAND._x000D_Aberdeen (77)	Aberdeen (77)	NJ 941 028	SCOTLAND						C	394100	802800	http://www.bgs.ac.uk/data/britrocks/britrocks.cfc?method=viewSamples&sampleId=284871	http://www.largeimages.bgs.ac.uk/iip/britrocks.html?id=120000/121115	http://www.largeimages.bgs.ac.uk/iip/britrocks.html?id=120000/121114
284872										0	S1751	1751	1751	1751	Geikie,A.	*	'Original entry: Garnet-Muscovite-Biotite Gneiss'	1	Stoneyhill 3 miles S of Aberdeen._x000D_SCOTLAND._x000D_Aberdeen (77)	Aberdeen (77)	NJ 941 028	SCOTLAND						C	394100	802800	http://www.bgs.ac.uk/data/britrocks/britrocks.cfc?method=viewSamples&sampleId=284872	http://www.largeimages.bgs.ac.uk/iip/britrocks.html?id=120000/121119	http://www.largeimages.bgs.ac.uk/iip/britrocks.html?id=120000/121118
284873										0	S1752	1752	1752	1752	Geikie,A.	*	'Original entry: Felsite (Pink)'	1	Shore, Robin Hood's Bay, 3.5 miles S of Aberden._x000D_SCOTLAND._x000D_Aberdeen (77)	Aberdeen (77)	NJ 965 027	SCOTLAND		Compact				C	396500	802700	http://www.bgs.ac.uk/data/britrocks/britrocks.cfc?method=viewSamples&sampleId=284873	http://www.largeimages.bgs.ac.uk/iip/britrocks.html?id=120000/121121	http://www.largeimages.bgs.ac.uk/iip/britrocks.html?id=120000/121120
277179										0	S1753/A	1753	1753	1753	Geikie,A.	*	'Original entry: Graphic Granite'	1	Bruckley, Strichen._x000D_SCOTLAND._x000D_Peterhead (87)	Peterhead (87)	NJ 928 507	SCOTLAND						N	392800	850700	http://www.bgs.ac.uk/data/britrocks/britrocks.cfc?method=viewSamples&sampleId=277179	http://www.largeimages.bgs.ac.uk/iip/britrocks.html?id=120000/121125	http://www.largeimages.bgs.ac.uk/iip/britrocks.html?id=120000/121124
277180										0	S1753/B	1753	1753	1753	Geikie,A.	*		0	3 miles SE of Strichen._x000D_SCOTLAND._x000D_Peterhead (87)	Peterhead (87)	NJ 98 51	SCOTLAND						N	398000	851000	http://www.bgs.ac.uk/data/britrocks/britrocks.cfc?method=viewSamples&sampleId=277180
277181										0	S1755	1755	1755	1755	Geikie,A.	*	'Original entry: Quartz Porphyry'	1	Buchan Ness Lighthouse._x000D_SCOTLAND._x000D_Peterhead (87)	Peterhead (87)	NK 137 422	SCOTLAND						N	413700	842200	http://www.bgs.ac.uk/data/britrocks/britrocks.cfc?method=viewSamples&sampleId=277181	http://www.largeimages.bgs.ac.uk/iip/britrocks.html?id=120000/121129	http://www.largeimages.bgs.ac.uk/iip/britrocks.html?id=120000/121128
277182										0	S1756	1756	1756	1756	Geikie,A.	*	'Original entry: Quartz Porphyry'	1	Buchan Ness Lighthouse._x000D_SCOTLAND._x000D_Peterhead (87)	Peterhead (87)	NK 137 422	SCOTLAND						N	413700	842200	http://www.bgs.ac.uk/data/britrocks/britrocks.cfc?method=viewSamples&sampleId=277182	http://www.largeimages.bgs.ac.uk/iip/britrocks.html?id=120000/121131	http://www.largeimages.bgs.ac.uk/iip/britrocks.html?id=120000/121130
277183										0	S1757	1757	1757	1757	Geikie,A.	*	'Original entry: Dolerite'	1	Stirling, near Peterhead._x000D_SCOTLAND._x000D_Peterhead (87)	Peterhead (87)	NK 129 418	SCOTLAND		Dyke in granite				N	412900	841800	http://www.bgs.ac.uk/data/britrocks/britrocks.cfc?method=viewSamples&sampleId=277183	http://www.largeimages.bgs.ac.uk/iip/britrocks.html?id=120000/121133	http://www.largeimages.bgs.ac.uk/iip/britrocks.html?id=120000/121132
285127										0	S1758	1758	1758	1758	Geikie,A.	*	'Original entry: Biotite Gneiss'	1	Quarry immediately S of Keith._x000D_SCOTLAND._x000D_Rothes (85)	Rothes (85)	NJ 425 504	SCOTLAND		Mem. sh. 85, p. 44				N	342500	850400	http://www.bgs.ac.uk/data/britrocks/britrocks.cfc?method=viewSamples&sampleId=285127	http://www.largeimages.bgs.ac.uk/iip/britrocks.html?id=120000/121135	http://www.largeimages.bgs.ac.uk/iip/britrocks.html?id=120000/121134
274042										0	S1760; S1760/a;	1760	1760	1760	Geikie,A.	*	'Original entry: Quartzite'	1	Hill SE of Keith._x000D_SCOTLAND._x000D_Huntly (86)	Huntly (86)	NJ 47 49	SCOTLAND						N	347000	849000	http://www.bgs.ac.uk/data/britrocks/britrocks.cfc?method=viewSamples&sampleId=274042	http://www.largeimages.bgs.ac.uk/iip/britrocks.html?id=120000/121139	http://www.largeimages.bgs.ac.uk/iip/britrocks.html?id=120000/121138	http://www.largeimages.bgs.ac.uk/iip/britrocks.html?id=120000/121141	http://www.largeimages.bgs.ac.uk/iip/britrocks.html?id=120000/121140
285130										0	S1764/a	1764	1764	1764	Geikie,A.	*	'Original entry: Crystalline Limestone'	1	Dufftown._x000D_SCOTLAND._x000D_Rothes (85)	Rothes (85)	NJ 329 399	SCOTLAND		Crystalline limestone; dark, impure				N	332900	839900	http://www.bgs.ac.uk/data/britrocks/britrocks.cfc?method=viewSamples&sampleId=285130	http://www.largeimages.bgs.ac.uk/iip/britrocks.html?id=120000/121151	http://www.largeimages.bgs.ac.uk/iip/britrocks.html?id=120000/121150
285131										0	S1765	1765	1765	1765	Geikie,A.	*	'Original entry: Crystalline Limestone'	1	Blackhillock Quarry, Keith._x000D_SCOTLAND._x000D_Rothes (85)	Rothes (85)	NJ 439 482	SCOTLAND		Mem. sh. 85, pp. 18, 48				N	343900	848200	http://www.bgs.ac.uk/data/britrocks/britrocks.cfc?method=viewSamples&sampleId=285131	http://www.largeimages.bgs.ac.uk/iip/britrocks.html?id=120000/121153	http://www.largeimages.bgs.ac.uk/iip/britrocks.html?id=120000/121152
285132										0	S1766	1766	1766	1766	Geikie,A.	*	'Original entry: Biotite Schist And Limestone'	1	Blackhillock Quarry, Keith._x000D_SCOTLAND._x000D_Rothes (85)	Rothes (85)	NJ 439 482	SCOTLAND		Mem. sh. 85, pp. 18, 48				N	343900	848200	http://www.bgs.ac.uk/data/britrocks/britrocks.cfc?method=viewSamples&sampleId=285132	http://www.largeimages.bgs.ac.uk/iip/britrocks.html?id=120000/121155	http://www.largeimages.bgs.ac.uk/iip/britrocks.html?id=120000/121154
285133										0	S1767	1767	1767	1767	Geikie,A.	*	'Original entry: Micaceous Limestone'	1	Blackhillock Quarry, Keith._x000D_SCOTLAND._x000D_Rothes (85)	Rothes (85)	NJ 439 482	SCOTLAND		Band in limestone; mem. sh. 85, pp. 18, 48				N	343900	848200	http://www.bgs.ac.uk/data/britrocks/britrocks.cfc?method=viewSamples&sampleId=285133	http://www.largeimages.bgs.ac.uk/iip/britrocks.html?id=120000/121157	http://www.largeimages.bgs.ac.uk/iip/britrocks.html?id=120000/121156
285134										0	S1768	1768	1768	1768	Geikie,A.	*	'Original entry: Micaceous Limestone'	1	Blackhillock Quarry, Keith._x000D_SCOTLAND._x000D_Rothes (85)	Rothes (85)	NJ 439 482	SCOTLAND		Mem. sh. 85, pp. 18, 48				N	343900	848200	http://www.bgs.ac.uk/data/britrocks/britrocks.cfc?method=viewSamples&sampleId=285134	http://www.largeimages.bgs.ac.uk/iip/britrocks.html?id=120000/121159	http://www.largeimages.bgs.ac.uk/iip/britrocks.html?id=120000/121158
268229										0	S1769	1769	1769	1769	Geikie,A.	*	'Original entry: Serpentine'	1	Blackwater Lodge, 7 miles E of S of Dufftown._x000D_SCOTLAND._x000D_Tomintoul (75)	Tomintoul (75)	NJ 336 286	SCOTLAND		See memoir, p. 24				N	333600	828600	http://www.bgs.ac.uk/data/britrocks/britrocks.cfc?method=viewSamples&sampleId=268229	http://www.largeimages.bgs.ac.uk/iip/britrocks.html?id=120000/121161	http://www.largeimages.bgs.ac.uk/iip/britrocks.html?id=120000/121160
268230										0	S1770	1770	1770	1770	Geikie,A.	*	'Original entry: Schistose Serpentinite'	1	Blackwater Lodge, 7 miles E of S of Dufftown._x000D_SCOTLAND._x000D_Tomintoul (75)	Tomintoul (75)	NJ 336 286	SCOTLAND		See memoir, p. 24				N	333600	828600	http://www.bgs.ac.uk/data/britrocks/britrocks.cfc?method=viewSamples&sampleId=268230	http://www.largeimages.bgs.ac.uk/iip/britrocks.html?id=120000/121163	http://www.largeimages.bgs.ac.uk/iip/britrocks.html?id=120000/121162
274043										0	S1771	1771	1771	1771	Geikie,A.	*	'Original entry: Olivine Serpentine'	1	Limehillock Quarry, near Grange._x000D_SCOTLAND._x000D_Huntly (86)	Huntly (86)	NJ 5150 5181	SCOTLAND		Tremolite				N	351500	851810	http://www.bgs.ac.uk/data/britrocks/britrocks.cfc?method=viewSamples&sampleId=274043	http://www.largeimages.bgs.ac.uk/iip/britrocks.html?id=120000/121165	http://www.largeimages.bgs.ac.uk/iip/britrocks.html?id=120000/121164
274044										0	S1772	1772	1772	1772	Geikie,A.	*	'Original entry: Olivine Serpentine'	1	Limehillock Quarry, near Grange._x000D_SCOTLAND._x000D_Huntly (86)	Huntly (86)	NJ 5150 5181	SCOTLAND						N	351500	851810	http://www.bgs.ac.uk/data/britrocks/britrocks.cfc?method=viewSamples&sampleId=274044	http://www.largeimages.bgs.ac.uk/iip/britrocks.html?id=120000/121167	http://www.largeimages.bgs.ac.uk/iip/britrocks.html?id=120000/121166
274045										0	S1773	1773	1773	1773	Geikie,A.	*	'Original entry: Olivine Serpentine'	1	Limehillock Quarry, near Grange._x000D_SCOTLAND._x000D_Huntly (86)	Huntly (86)	NJ 5150 5181	SCOTLAND						N	351500	851810	http://www.bgs.ac.uk/data/britrocks/britrocks.cfc?method=viewSamples&sampleId=274045	http://www.largeimages.bgs.ac.uk/iip/britrocks.html?id=120000/121169	http://www.largeimages.bgs.ac.uk/iip/britrocks.html?id=120000/121168
277184										0	S1782	1782	1782	1782	Geikie,A.	*	'Original entry: Biotite Norite'	1	Railway, 0.5 mile N of Maud Junction._x000D_SCOTLAND._x000D_Peterhead (87)	Peterhead (87)	NJ 925 487	SCOTLAND		(williams gabbro)				N	392500	848700	http://www.bgs.ac.uk/data/britrocks/britrocks.cfc?method=viewSamples&sampleId=277184	http://www.largeimages.bgs.ac.uk/iip/britrocks.html?id=120000/121181	http://www.largeimages.bgs.ac.uk/iip/britrocks.html?id=120000/121180
284874										0	S1783	1783	1783	1783	Geikie,A.	*	'Original entry: Picrite'	1	SW of Udny; 14.5 miles NW of Aberdeen._x000D_SCOTLAND._x000D_Aberdeen (77)	Aberdeen (77)	NJ 877 250	SCOTLAND		Much olivine; chromite				C	387700	825000	http://www.bgs.ac.uk/data/britrocks/britrocks.cfc?method=viewSamples&sampleId=284874	http://www.largeimages.bgs.ac.uk/iip/britrocks.html?id=120000/121183	http://www.largeimages.bgs.ac.uk/iip/britrocks.html?id=120000/121182
284875										0	S1784	1784	1784	1784	Geikie,A.	*	'Original entry: Picrite'	1	SW of Udny; 14.5 miles NW of Aberdeen._x000D_SCOTLAND._x000D_Aberdeen (77)	Aberdeen (77)	NJ 877 250	SCOTLAND		Diallage crystal				C	387700	825000	http://www.bgs.ac.uk/data/britrocks/britrocks.cfc?method=viewSamples&sampleId=284875	http://www.largeimages.bgs.ac.uk/iip/britrocks.html?id=120000/121185	http://www.largeimages.bgs.ac.uk/iip/britrocks.html?id=120000/121184
284876										0	S1785	1785	1785	1785	Geikie,A.	*	'Original entry: Picrite'	1	SW of Udny; 14.5 miles NW of Aberdeen._x000D_SCOTLAND._x000D_Aberdeen (77)	Aberdeen (77)	NJ 877 250	SCOTLAND						C	387700	825000	http://www.bgs.ac.uk/data/britrocks/britrocks.cfc?method=viewSamples&sampleId=284876	http://www.largeimages.bgs.ac.uk/iip/britrocks.html?id=120000/121187	http://www.largeimages.bgs.ac.uk/iip/britrocks.html?id=120000/121186
284877										0	S1786	1786	1786	1786	Geikie,A.	*	'Original entry: Troctolite'	1	2 miles SW of Udny._x000D_SCOTLAND._x000D_Aberdeen (77)	Aberdeen (77)	NJ 877 250	SCOTLAND		Typical				C	387700	825000	http://www.bgs.ac.uk/data/britrocks/britrocks.cfc?method=viewSamples&sampleId=284877	http://www.largeimages.bgs.ac.uk/iip/britrocks.html?id=120000/121189	http://www.largeimages.bgs.ac.uk/iip/britrocks.html?id=120000/121188
285135										0	S1788	1788	1788	1788	Geikie,A.	*	'Original entry: Hornblende Rock'	1	Shenvall, Blackwter._x000D_SCOTLAND._x000D_Rothes (85)	Rothes (85)	NJ 369 308	SCOTLAND		Mem. sh. 85, p. 45				N	336900	830800	http://www.bgs.ac.uk/data/britrocks/britrocks.cfc?method=viewSamples&sampleId=285135	http://www.largeimages.bgs.ac.uk/iip/britrocks.html?id=120000/121193	http://www.largeimages.bgs.ac.uk/iip/britrocks.html?id=120000/121192
352235										0	S1789	1789	1789	1789	Geikie,A.	*	'Original entry: Mica Schist'	1	Glenelg._x000D_SCOTLAND._x000D_Glenelg (71)	Glenelg (71)	NG 81 20	SCOTLAND		?epidote				N	181000	820000	http://www.bgs.ac.uk/data/britrocks/britrocks.cfc?method=viewSamples&sampleId=352235	http://www.largeimages.bgs.ac.uk/iip/britrocks.html?id=120000/121195	http://www.largeimages.bgs.ac.uk/iip/britrocks.html?id=120000/121194
352236										0	S1790	1790	1790	1790	Geikie,A.	*	'Original entry: Mica Schist'	1	Glenelg._x000D_SCOTLAND._x000D_Glenelg (71)	Glenelg (71)	NG 81 20	SCOTLAND		Micro flaser structure				N	181000	820000	http://www.bgs.ac.uk/data/britrocks/britrocks.cfc?method=viewSamples&sampleId=352236	http://www.largeimages.bgs.ac.uk/iip/britrocks.html?id=120000/121197	http://www.largeimages.bgs.ac.uk/iip/britrocks.html?id=120000/121196
333513										0	S1798	1798	1798	1798	Geikie,A.	*	'Original entry: Crystalline Limestone'	1	Loch Duich, shore near Glen Shiel Church._x000D_SCOTLAND._x000D_Cluanie (72)	Cluanie (72)	NG 902 212	SCOTLAND						N	190200	821200	http://www.bgs.ac.uk/data/britrocks/britrocks.cfc?method=viewSamples&sampleId=333513	http://www.largeimages.bgs.ac.uk/iip/britrocks.html?id=120000/121213	http://www.largeimages.bgs.ac.uk/iip/britrocks.html?id=120000/121212
333514										0	S1799	1799	1799	1799	Geikie,A.	*	'Original entry: Ophicalcite'	1	Loch Duich, shore near Glen Shiel Church._x000D_SCOTLAND._x000D_Cluanie (72)	Cluanie (72)	NG 902 212	SCOTLAND		Serpentinous limestone				N	190200	821200	http://www.bgs.ac.uk/data/britrocks/britrocks.cfc?method=viewSamples&sampleId=333514	http://www.largeimages.bgs.ac.uk/iip/britrocks.html?id=120000/121215	http://www.largeimages.bgs.ac.uk/iip/britrocks.html?id=120000/121214
352237										0	S1800; S1800/a;	1800	1800	1800	Geikie,A.	*	'Original entry: Amphibolite'	1	Totaig Ferry._x000D_SCOTLAND._x000D_Glenelg (71)	Glenelg (71)	NG 877 253	SCOTLAND						N	187700	825300	http://www.bgs.ac.uk/data/britrocks/britrocks.cfc?method=viewSamples&sampleId=352237	http://www.largeimages.bgs.ac.uk/iip/britrocks.html?id=120000/121217	http://www.largeimages.bgs.ac.uk/iip/britrocks.html?id=120000/121216	http://www.largeimages.bgs.ac.uk/iip/britrocks.html?id=120000/121219	http://www.largeimages.bgs.ac.uk/iip/britrocks.html?id=120000/121218
352238										0	S1801	1801	1801	1801	Geikie,A.	*	'Original entry: Amphibolite'	1	Loch Duich._x000D_SCOTLAND._x000D_Glenelg (71)	Glenelg (71)	NG 8 2	SCOTLAND						N	180000	820000	http://www.bgs.ac.uk/data/britrocks/britrocks.cfc?method=viewSamples&sampleId=352238	http://www.largeimages.bgs.ac.uk/iip/britrocks.html?id=120000/121221	http://www.largeimages.bgs.ac.uk/iip/britrocks.html?id=120000/121220
352239										0	S1802	1802	1802	1802	Geikie,A.	*	'Original entry: Biotite Mainly, With Green And Bluish Hornblende'	1	Glenelg, N of Bernera Barracks._x000D_SCOTLAND._x000D_Glenelg (71)	Glenelg (71)	NG 814 203	SCOTLAND						N	181400	820300	http://www.bgs.ac.uk/data/britrocks/britrocks.cfc?method=viewSamples&sampleId=352239	http://www.largeimages.bgs.ac.uk/iip/britrocks.html?id=120000/121223	http://www.largeimages.bgs.ac.uk/iip/britrocks.html?id=120000/121222
352240										0	S1803	1803	1803	1803	Geikie,A.	*	'Original entry: Hornblende Rock'	1	Glenelg, N of Bernera Barracks._x000D_SCOTLAND._x000D_Glenelg (71)	Glenelg (71)	NG 814 203	SCOTLAND		Malacolite?				N	181400	820300	http://www.bgs.ac.uk/data/britrocks/britrocks.cfc?method=viewSamples&sampleId=352240	http://www.largeimages.bgs.ac.uk/iip/britrocks.html?id=120000/121225	http://www.largeimages.bgs.ac.uk/iip/britrocks.html?id=120000/121224
352241										0	S1804	1804	1804	1804	Geikie,A.	*	'Original entry: Hornblende Schist'	1	1.5 mile E of Totaig Ferry._x000D_SCOTLAND._x000D_Glenelg (71)	Glenelg (71)	NG 883 238	SCOTLAND						N	188300	823800	http://www.bgs.ac.uk/data/britrocks/britrocks.cfc?method=viewSamples&sampleId=352241	http://www.largeimages.bgs.ac.uk/iip/britrocks.html?id=120000/121227	http://www.largeimages.bgs.ac.uk/iip/britrocks.html?id=120000/121226
352242										0	S1805	1805	1805	1805	Geikie,A.	*	'Original entry: Eclogite'	1	Totaig Ferry._x000D_SCOTLAND._x000D_Glenelg (71)	Glenelg (71)	NG 877 253	SCOTLAND		See miner mag vol 9, no. 43, 1891, pp. 217-218				N	187700	825300	http://www.bgs.ac.uk/data/britrocks/britrocks.cfc?method=viewSamples&sampleId=352242	http://www.largeimages.bgs.ac.uk/iip/britrocks.html?id=120000/121229	http://www.largeimages.bgs.ac.uk/iip/britrocks.html?id=120000/121228
352243										0	S1806	1806	1806	1806	Geikie,A.	*	'Original entry: Biotite-Hornblende Rock'	1	N of Bernera Barracks._x000D_SCOTLAND._x000D_Glenelg (71)	Glenelg (71)	NG 814 203	SCOTLAND						N	181400	820300	http://www.bgs.ac.uk/data/britrocks/britrocks.cfc?method=viewSamples&sampleId=352243	http://www.largeimages.bgs.ac.uk/iip/britrocks.html?id=120000/121231	http://www.largeimages.bgs.ac.uk/iip/britrocks.html?id=120000/121230
352244										0	S1807	1807	1807	1807	Geikie,A.	*	'Original entry: Biotite-Hornblende Schist'	1	N of Bernera Barracks._x000D_SCOTLAND._x000D_Glenelg (71)	Glenelg (71)	NG 814 203	SCOTLAND						N	181400	820300	http://www.bgs.ac.uk/data/britrocks/britrocks.cfc?method=viewSamples&sampleId=352244	http://www.largeimages.bgs.ac.uk/iip/britrocks.html?id=120000/121233	http://www.largeimages.bgs.ac.uk/iip/britrocks.html?id=120000/121232
333515										0	S1808	1808	1808	1808	Geikie,A.	*	'Original entry: Actinolite Rock'	1	W of Glen Shiel Church, Loch Duich._x000D_SCOTLAND._x000D_Cluanie (72)	Cluanie (72)	NG 895 213	SCOTLAND		Schistose				N	189500	821300	http://www.bgs.ac.uk/data/britrocks/britrocks.cfc?method=viewSamples&sampleId=333515	http://www.largeimages.bgs.ac.uk/iip/britrocks.html?id=120000/121235	http://www.largeimages.bgs.ac.uk/iip/britrocks.html?id=120000/121234
333516										0	S1809	1809	1809	1809	Geikie,A.	*	'Original entry: Actinolite Rock'	1	Shore near Glen Shiel Church, Loch Duich._x000D_SCOTLAND._x000D_Cluanie (72)	Cluanie (72)	NG 904 210	SCOTLAND		Schistose				N	190400	821000	http://www.bgs.ac.uk/data/britrocks/britrocks.cfc?method=viewSamples&sampleId=333516	http://www.largeimages.bgs.ac.uk/iip/britrocks.html?id=120000/121237	http://www.largeimages.bgs.ac.uk/iip/britrocks.html?id=120000/121236
352245										0	S1810	1810	1810	1810	Geikie,A.	*	'Original entry: Biotite-Hornblende Rock'	1	Totaig Ferry._x000D_SCOTLAND._x000D_Glenelg (71)	Glenelg (71)	NG 877 253	SCOTLAND						N	187700	825300	http://www.bgs.ac.uk/data/britrocks/britrocks.cfc?method=viewSamples&sampleId=352245	http://www.largeimages.bgs.ac.uk/iip/britrocks.html?id=120000/121239	http://www.largeimages.bgs.ac.uk/iip/britrocks.html?id=120000/121238
352246										0	S1811	1811	1811	1811	Geikie,A.	*	'Original entry: Biotite Gneiss'	1	Clliffs N of Bernera Barracks._x000D_SCOTLAND._x000D_Glenelg (71)	Glenelg (71)	NG 816 202	SCOTLAND		?pyroxene				N	181600	820200	http://www.bgs.ac.uk/data/britrocks/britrocks.cfc?method=viewSamples&sampleId=352246	http://www.largeimages.bgs.ac.uk/iip/britrocks.html?id=120000/121241	http://www.largeimages.bgs.ac.uk/iip/britrocks.html?id=120000/121240
352247										0	S1812	1812	1812	1812	Geikie,A.	*	'Original entry: Hornblende Eclogite'	1	Letterfearn, Loch Duich._x000D_SCOTLAND._x000D_Glenelg (71)	Glenelg (71)	NG 882 242	SCOTLAND						N	188200	824200	http://www.bgs.ac.uk/data/britrocks/britrocks.cfc?method=viewSamples&sampleId=352247	http://www.largeimages.bgs.ac.uk/iip/britrocks.html?id=120000/121243	http://www.largeimages.bgs.ac.uk/iip/britrocks.html?id=120000/121242
336037										0	S1813	1813	1813	1813	Geikie,A.	*	'Original entry: Hornblende-Biotite Rock'	1	Shore W of Glen Shiel Church, Loch Duich._x000D_SCOTLAND._x000D_Cluanie (72)	Cluanie (72)	NG 899 215	SCOTLAND		Malacolite rock				N	189900	821500	http://www.bgs.ac.uk/data/britrocks/britrocks.cfc?method=viewSamples&sampleId=336037	http://www.largeimages.bgs.ac.uk/iip/britrocks.html?id=120000/121245	http://www.largeimages.bgs.ac.uk/iip/britrocks.html?id=120000/121244
336038										0	S1814	1814	1814	1814	Geikie,A.	*	'Original entry: Granite'	1	E side of granite mass, Loch Duich._x000D_SCOTLAND._x000D_Cluanie (72)	Cluanie (72)	NG 92 19	SCOTLAND		Two micas and sphene				N	192000	819000	http://www.bgs.ac.uk/data/britrocks/britrocks.cfc?method=viewSamples&sampleId=336038	http://www.largeimages.bgs.ac.uk/iip/britrocks.html?id=120000/121247	http://www.largeimages.bgs.ac.uk/iip/britrocks.html?id=120000/121246
352248										0	S1815; S1815/a;	1815	1815	1815	Geikie,A.	*		0	Glenelg._x000D_SCOTLAND._x000D_Glenelg (71)	Glenelg (71)	NG 81 20	SCOTLAND						N	181000	820000	http://www.bgs.ac.uk/data/britrocks/britrocks.cfc?method=viewSamples&sampleId=352248	http://www.largeimages.bgs.ac.uk/iip/britrocks.html?id=120000/121249	http://www.largeimages.bgs.ac.uk/iip/britrocks.html?id=120000/121248	http://www.largeimages.bgs.ac.uk/iip/britrocks.html?id=120000/121251	http://www.largeimages.bgs.ac.uk/iip/britrocks.html?id=120000/121250
352249										0	S1816	1816	1816	1816	Geikie,A.	*	'Original entry: Minette'	1	N of Bernera Barracks._x000D_SCOTLAND._x000D_Glenelg (71)	Glenelg (71)	NG 810 203	SCOTLAND						N	181000	820300	http://www.bgs.ac.uk/data/britrocks/britrocks.cfc?method=viewSamples&sampleId=352249	http://www.largeimages.bgs.ac.uk/iip/britrocks.html?id=120000/121253	http://www.largeimages.bgs.ac.uk/iip/britrocks.html?id=120000/121252
336039										0	S1817	1817	1817	1817	Geikie,A.	*	'Original entry: Minette'	1	W of Glen Shiel Church, Loch Duich._x000D_SCOTLAND._x000D_Cluanie (72)	Cluanie (72)	NG 89 21	SCOTLAND		Vein in actinolite rock				N	189000	821000	http://www.bgs.ac.uk/data/britrocks/britrocks.cfc?method=viewSamples&sampleId=336039	http://www.largeimages.bgs.ac.uk/iip/britrocks.html?id=120000/121255	http://www.largeimages.bgs.ac.uk/iip/britrocks.html?id=120000/121254
231113								X		2	S1818; COLLNORYF1498;	1818	1818	1818	Geikie,A.	*	'Original entry: Hornblende Gneiss'	1	Inverclaish, Loch Laxford._x000D_SCOTLAND._x000D_Lochinver (107)	Lochinver (107)	NC 207 478	SCOTLAND						N	220700	947800	http://www.bgs.ac.uk/data/britrocks/britrocks.cfc?method=viewSamples&sampleId=231113	http://www.largeimages.bgs.ac.uk/iip/britrocks.html?id=120000/121257	http://www.largeimages.bgs.ac.uk/iip/britrocks.html?id=120000/121256
231114								X		2	S1819; COLLNORYF1499;	1819	1819	1819	Geikie,A.	*	'Original entry: Gneissose Pegmatite'	1	N of Loch Laxford._x000D_SCOTLAND._x000D_Cape Wrath (113)	Cape Wrath (113)	NC 2 5	SCOTLAND		Gneissose pegmatite				N	220000	950000	http://www.bgs.ac.uk/data/britrocks/britrocks.cfc?method=viewSamples&sampleId=231114	http://www.largeimages.bgs.ac.uk/iip/britrocks.html?id=120000/121259	http://www.largeimages.bgs.ac.uk/iip/britrocks.html?id=120000/121258
231115								X		2	S1820; COLLNORYF1500;	1820	1820	1820	Geikie,A.	*	'Original entry: Pyroxene Gneiss'	1	Loch Assynt, 5 miles N of Inchnadamph._x000D_SCOTLAND._x000D_Lochinver (107)	Lochinver (107)	NC 18 26	SCOTLAND						N	218000	926000	http://www.bgs.ac.uk/data/britrocks/britrocks.cfc?method=viewSamples&sampleId=231115	http://www.largeimages.bgs.ac.uk/iip/britrocks.html?id=120000/121261	http://www.largeimages.bgs.ac.uk/iip/britrocks.html?id=120000/121260
231116								X		2	S1821; COLLNORYF1501;	1821	1821	1821	Geikie,A.	*	'Original entry: Pyroxene Gneiss (Altered)'	1	Loch Assynt, 5 miles N of Inchnadamph._x000D_SCOTLAND._x000D_Lochinver (107)	Lochinver (107)	NC 18 26	SCOTLAND		Uralite				N	218000	926000	http://www.bgs.ac.uk/data/britrocks/britrocks.cfc?method=viewSamples&sampleId=231116	http://www.largeimages.bgs.ac.uk/iip/britrocks.html?id=120000/121263	http://www.largeimages.bgs.ac.uk/iip/britrocks.html?id=120000/121262
231117								X		2	S1822; COLLNORYF1502;	1822	1822	1822	Geikie,A.	*	'Original entry: Hornblende-Biotite Gneiss'	1	N end of Loch Laxford._x000D_SCOTLAND._x000D_Lochinver (107)	Lochinver (107)	NC 2 4	SCOTLAND						N	220000	940000	http://www.bgs.ac.uk/data/britrocks/britrocks.cfc?method=viewSamples&sampleId=231117	http://www.largeimages.bgs.ac.uk/iip/britrocks.html?id=120000/121265	http://www.largeimages.bgs.ac.uk/iip/britrocks.html?id=120000/121264
231118								X		2	S1823; COLLNORYF1503;	1823	1823	1823	Geikie,A.	*	'Original entry: Hornblende-Scapolite Pyroxenite'	1	Badcall, near Scourie._x000D_SCOTLAND._x000D_Lochinver (107)	Lochinver (107)	NC 15 41	SCOTLAND		Hornblende rock with little feldspar				N	215000	941000	http://www.bgs.ac.uk/data/britrocks/britrocks.cfc?method=viewSamples&sampleId=231118	http://www.largeimages.bgs.ac.uk/iip/britrocks.html?id=120000/121267	http://www.largeimages.bgs.ac.uk/iip/britrocks.html?id=120000/121266
231119								X		2	S1824; COLLNORYF1504;	1824	1824	1824	Geikie,A.	*	'Original entry: Hornblende-Oligoclase Pyroxenite'	1	Kylesku._x000D_SCOTLAND._x000D_Lochinver (107)	Lochinver (107)	NC 23 33	SCOTLAND						N	223000	933000	http://www.bgs.ac.uk/data/britrocks/britrocks.cfc?method=viewSamples&sampleId=231119	http://www.largeimages.bgs.ac.uk/iip/britrocks.html?id=120000/121269	http://www.largeimages.bgs.ac.uk/iip/britrocks.html?id=120000/121268
231120								X		2	S1825; COLLNORYF1505;	1825	1825	1825	Geikie,A.	*	'Original entry: Hornblende-Oligoclase Pyroxenite'	1	Kylesku._x000D_SCOTLAND._x000D_Lochinver (107)	Lochinver (107)	NC 23 33	SCOTLAND						N	223000	933000	http://www.bgs.ac.uk/data/britrocks/britrocks.cfc?method=viewSamples&sampleId=231120	http://www.largeimages.bgs.ac.uk/iip/britrocks.html?id=120000/121271	http://www.largeimages.bgs.ac.uk/iip/britrocks.html?id=120000/121270
231121								X		2	S1826; COLLNORYF1506;	1826	1826	1826	Geikie,A.	*	'Original entry: Hornblende Schist'	1	Kylesku._x000D_SCOTLAND._x000D_Lochinver (107)	Lochinver (107)	NC 23 33	SCOTLAND						N	223000	933000	http://www.bgs.ac.uk/data/britrocks/britrocks.cfc?method=viewSamples&sampleId=231121	http://www.largeimages.bgs.ac.uk/iip/britrocks.html?id=120000/121273	http://www.largeimages.bgs.ac.uk/iip/britrocks.html?id=120000/121272
231122								X		2	S1827; COLLNORYF1507;	1827	1827	1827	Geikie,A.	*	'Original entry: Hornblende Schist'	1	Kylesku._x000D_SCOTLAND._x000D_Lochinver (107)	Lochinver (107)	NC 23 33	SCOTLAND		Epidote				N	223000	933000	http://www.bgs.ac.uk/data/britrocks/britrocks.cfc?method=viewSamples&sampleId=231122	http://www.largeimages.bgs.ac.uk/iip/britrocks.html?id=120000/121275	http://www.largeimages.bgs.ac.uk/iip/britrocks.html?id=120000/121274
292455								X		0	S1828	1828	1828	1828	Geikie,A.	*	'Original entry: Hornblende-Pyroxene Gneiss'	1	Near Rhiconich._x000D_SCOTLAND._x000D_Cape Wrath (113)	Cape Wrath (113)	NC 25 52	SCOTLAND						N	225000	952000	http://www.bgs.ac.uk/data/britrocks/britrocks.cfc?method=viewSamples&sampleId=292455	http://www.largeimages.bgs.ac.uk/iip/britrocks.html?id=120000/121277	http://www.largeimages.bgs.ac.uk/iip/britrocks.html?id=120000/121276
292456								X		0	S1829	1829	1829	1829	Geikie,A.	*	'Original entry: Hornblende Gneiss'	1	Near Rhiconich._x000D_SCOTLAND._x000D_Cape Wrath (113)	Cape Wrath (113)	NC 25 52	SCOTLAND						N	225000	952000	http://www.bgs.ac.uk/data/britrocks/britrocks.cfc?method=viewSamples&sampleId=292456	http://www.largeimages.bgs.ac.uk/iip/britrocks.html?id=120000/121279	http://www.largeimages.bgs.ac.uk/iip/britrocks.html?id=120000/121278
292457								X		0	S1830	1830	1830	1830	Geikie,A.	*	'Original entry: Hornblende-Anthophyllite Rock'	1	Near Rhiconich._x000D_SCOTLAND._x000D_Cape Wrath (113)	Cape Wrath (113)	NC 25 52	SCOTLAND						N	225000	952000	http://www.bgs.ac.uk/data/britrocks/britrocks.cfc?method=viewSamples&sampleId=292457	http://www.largeimages.bgs.ac.uk/iip/britrocks.html?id=120000/121281	http://www.largeimages.bgs.ac.uk/iip/britrocks.html?id=120000/121280
231123								X		2	S1831; COLLNORYF1508;	1831	1831	1831	Geikie,A.	*	'Original entry: Biotite Gneiss'	1	Loch na Claish Fearn, 3 miles NE of Scourie._x000D_SCOTLAND._x000D_Lochinver (107)	Lochinver (107)	NC 20 46	SCOTLAND						N	220000	946000	http://www.bgs.ac.uk/data/britrocks/britrocks.cfc?method=viewSamples&sampleId=231123	http://www.largeimages.bgs.ac.uk/iip/britrocks.html?id=120000/121283	http://www.largeimages.bgs.ac.uk/iip/britrocks.html?id=120000/121282
231124								X		2	S1832; COLLNORYF1509;	1832	1832	1832	Geikie,A.	*	'Original entry: Hornblende Rock'	1	Roadside, 1 mile E of Scourie._x000D_SCOTLAND._x000D_Lochinver (107)	Lochinver (107)	NC 171 442	SCOTLAND		Pale hornblende				N	217100	944200	http://www.bgs.ac.uk/data/britrocks/britrocks.cfc?method=viewSamples&sampleId=231124	http://www.largeimages.bgs.ac.uk/iip/britrocks.html?id=120000/121285	http://www.largeimages.bgs.ac.uk/iip/britrocks.html?id=120000/121284
231125								X		2	S1833; COLLNORYF1510;	1833	1833	1833	Geikie,A.	*	'Original entry: Hornblende Rock'	1	Roadside, 1 mile E of Scourie._x000D_SCOTLAND._x000D_Lochinver (107)	Lochinver (107)	NC 171 442	SCOTLAND		Pale hornblende				N	217100	944200	http://www.bgs.ac.uk/data/britrocks/britrocks.cfc?method=viewSamples&sampleId=231125	http://www.largeimages.bgs.ac.uk/iip/britrocks.html?id=120000/121287	http://www.largeimages.bgs.ac.uk/iip/britrocks.html?id=120000/121286
271228										0	S1834	1834	1834	1834	Geikie,A.	*	'Original entry: Hornblende Gneiss'	1	Shieldaig, Loch Torridon._x000D_SCOTLAND._x000D_Applecross (81)	Applecross (81)	NG 81 54	SCOTLAND						N	181000	854000	http://www.bgs.ac.uk/data/britrocks/britrocks.cfc?method=viewSamples&sampleId=271228	http://www.largeimages.bgs.ac.uk/iip/britrocks.html?id=120000/121289	http://www.largeimages.bgs.ac.uk/iip/britrocks.html?id=120000/121288
271229										0	S1835	1835	1835	1835	Geikie,A.	*	'Original entry: Hornblende Gneiss'	1	Outer Loch Torridon._x000D_SCOTLAND._x000D_Applecross (81)	Applecross (81)		SCOTLAND		Feldspar - hornblende - quartz				N			http://www.bgs.ac.uk/data/britrocks/britrocks.cfc?method=viewSamples&sampleId=271229	http://www.largeimages.bgs.ac.uk/iip/britrocks.html?id=120000/121291	http://www.largeimages.bgs.ac.uk/iip/britrocks.html?id=120000/121290
271212										0	S1836; S1836/a;	1836	1836	1836	Geikie,A.	*	'Original entry: Hornblende Gneiss'	1	North shore of Loch Torridon._x000D_SCOTLAND._x000D_Applecross (81)	Applecross (81)		SCOTLAND		(feldspar - hornblende - quartz - sphene)				N			http://www.bgs.ac.uk/data/britrocks/britrocks.cfc?method=viewSamples&sampleId=271212	http://www.largeimages.bgs.ac.uk/iip/britrocks.html?id=120000/121293	http://www.largeimages.bgs.ac.uk/iip/britrocks.html?id=120000/121292	http://www.largeimages.bgs.ac.uk/iip/britrocks.html?id=120000/121295	http://www.largeimages.bgs.ac.uk/iip/britrocks.html?id=120000/121294
271213										0	S1837	1837	1837	1837	Geikie,A.	*	'Original entry: Biotite Gneiss'	1	Outer Loch Torridon._x000D_SCOTLAND._x000D_Applecross (81)	Applecross (81)		SCOTLAND		Feldspar - biotite - quartz				N			http://www.bgs.ac.uk/data/britrocks/britrocks.cfc?method=viewSamples&sampleId=271213	http://www.largeimages.bgs.ac.uk/iip/britrocks.html?id=120000/121297	http://www.largeimages.bgs.ac.uk/iip/britrocks.html?id=120000/121296
271214										0	S1838	1838	1838	1838	Geikie,A.	*	'Original entry: Amphibolite'	1	North shore of Loch Torridon._x000D_SCOTLAND._x000D_Applecross (81)	Applecross (81)		SCOTLAND		Hornblende - biotite - epidote - quartz etc.				N			http://www.bgs.ac.uk/data/britrocks/britrocks.cfc?method=viewSamples&sampleId=271214	http://www.largeimages.bgs.ac.uk/iip/britrocks.html?id=120000/121299	http://www.largeimages.bgs.ac.uk/iip/britrocks.html?id=120000/121298
271215										0	S1839	1839	1839	1839	Geikie,A.	*	'Original entry: Crushed Epidote Gneiss?'	1	Outer Loch Torridon._x000D_SCOTLAND._x000D_Applecross (81)	Applecross (81)		SCOTLAND		Epidotic				N			http://www.bgs.ac.uk/data/britrocks/britrocks.cfc?method=viewSamples&sampleId=271215	http://www.largeimages.bgs.ac.uk/iip/britrocks.html?id=120000/121301	http://www.largeimages.bgs.ac.uk/iip/britrocks.html?id=120000/121300
270846										0	S1840	1840	1840	1840	Geikie,A.	*	'Original entry: Epidote Amphibolite'	1	NE side of Loch Maree, between Letterewe and Kinlochewe._x000D_SCOTLAND._x000D_Inverbroom (92)	Inverbroom (92)		SCOTLAND		Sphene				N			http://www.bgs.ac.uk/data/britrocks/britrocks.cfc?method=viewSamples&sampleId=270846	http://www.largeimages.bgs.ac.uk/iip/britrocks.html?id=120000/121303	http://www.largeimages.bgs.ac.uk/iip/britrocks.html?id=120000/121302
270847										0	S1841	1841	1841	1841	Geikie,A.	*	'Original entry: Hornblende-Biotite Schist'	1	Letterewe, Loch Maree._x000D_SCOTLAND._x000D_Inverbroom (92)	Inverbroom (92)	NG 952 720	SCOTLAND		Tourmaline				N	195200	872000	http://www.bgs.ac.uk/data/britrocks/britrocks.cfc?method=viewSamples&sampleId=270847	http://www.largeimages.bgs.ac.uk/iip/britrocks.html?id=120000/121305	http://www.largeimages.bgs.ac.uk/iip/britrocks.html?id=120000/121304
270848										0	S1842; S1842/a;	1842	1842	1842	Geikie,A.	*	'Original entry: Limestone'	1	Letterewe, Loch Maree._x000D_SCOTLAND._x000D_Inverbroom (92)	Inverbroom (92)	NG 951 722	SCOTLAND		Micaceous				N	195100	872200	http://www.bgs.ac.uk/data/britrocks/britrocks.cfc?method=viewSamples&sampleId=270848	http://www.largeimages.bgs.ac.uk/iip/britrocks.html?id=120000/121307	http://www.largeimages.bgs.ac.uk/iip/britrocks.html?id=120000/121306	http://www.largeimages.bgs.ac.uk/iip/britrocks.html?id=120000/121309	http://www.largeimages.bgs.ac.uk/iip/britrocks.html?id=120000/121308
270849										0	S1843	1843	1843	1843	Geikie,A.	*	'Original entry: Limestone'	1	Letterewe, Loch Maree._x000D_SCOTLAND._x000D_Inverbroom (92)	Inverbroom (92)	NG 951 722	SCOTLAND		With tremolite, mica and calcite				N	195100	872200	http://www.bgs.ac.uk/data/britrocks/britrocks.cfc?method=viewSamples&sampleId=270849	http://www.largeimages.bgs.ac.uk/iip/britrocks.html?id=120000/121311	http://www.largeimages.bgs.ac.uk/iip/britrocks.html?id=120000/121310
278081										0	S1844	1844	1844	1844	Geikie,A.	*	'Original entry: Biotite Gneiss'	1	North shore of Loch Tollie, between Gairloch and Poolewe._x000D_SCOTLAND._x000D_Gairloch (91)	Gairloch (91)	NG 841 788	SCOTLAND		Sphene and epidote				N	184100	878800	http://www.bgs.ac.uk/data/britrocks/britrocks.cfc?method=viewSamples&sampleId=278081	http://www.largeimages.bgs.ac.uk/iip/britrocks.html?id=120000/121313	http://www.largeimages.bgs.ac.uk/iip/britrocks.html?id=120000/121312
278082										0	S1845; S1845/a;	1845	1845	1845	Geikie,A.	*	'Original entry: Mylonite Gneiss'	1	S of Gairloch Hotel._x000D_SCOTLAND._x000D_Gairloch (91)	Gairloch (91)	NG 805 759	SCOTLAND		Much epidote				N	180500	875900	http://www.bgs.ac.uk/data/britrocks/britrocks.cfc?method=viewSamples&sampleId=278082	http://www.largeimages.bgs.ac.uk/iip/britrocks.html?id=120000/121315	http://www.largeimages.bgs.ac.uk/iip/britrocks.html?id=120000/121314	http://www.largeimages.bgs.ac.uk/iip/britrocks.html?id=120000/121317	http://www.largeimages.bgs.ac.uk/iip/britrocks.html?id=120000/121316
278083										0	S1846	1846	1846	1846	Geikie,A.	*	'Original entry: Biotite Gneiss'	1	S of Gairloch Hotel._x000D_SCOTLAND._x000D_Gairloch (91)	Gairloch (91)	NG 805 759	SCOTLAND		Large feldspars, much tourmaline				N	180500	875900	http://www.bgs.ac.uk/data/britrocks/britrocks.cfc?method=viewSamples&sampleId=278083	http://www.largeimages.bgs.ac.uk/iip/britrocks.html?id=120000/121319	http://www.largeimages.bgs.ac.uk/iip/britrocks.html?id=120000/121318
278084										0	S1847	1847	1847	1847	Geikie,A.	*	'Original entry: Mylonite Gneiss'	1	Shore S of Gairloch Hotel._x000D_SCOTLAND._x000D_Gairloch (91)	Gairloch (91)	NG 804 760	SCOTLAND		Much epidote				N	180400	876000	http://www.bgs.ac.uk/data/britrocks/britrocks.cfc?method=viewSamples&sampleId=278084	http://www.largeimages.bgs.ac.uk/iip/britrocks.html?id=120000/121321	http://www.largeimages.bgs.ac.uk/iip/britrocks.html?id=120000/121320
278085										0	S1848	1848	1848	1848	Geikie,A.	*	'Original entry: Actinolite Schist'	1	Behind Gairloch Hotel._x000D_SCOTLAND._x000D_Gairloch (91)	Gairloch (91)	NG 807 763	SCOTLAND		Fine grained				N	180700	876300	http://www.bgs.ac.uk/data/britrocks/britrocks.cfc?method=viewSamples&sampleId=278085	http://www.largeimages.bgs.ac.uk/iip/britrocks.html?id=120000/121323	http://www.largeimages.bgs.ac.uk/iip/britrocks.html?id=120000/121322
278086										0	S1849	1849	1849	1849	Geikie,A.	*	'Original entry: Hornblende Schist'	1	1 mile north of Gairloch Hotel._x000D_SCOTLAND._x000D_Gairloch (91)	Gairloch (91)	NG 799 778	SCOTLAND		Below torridonian				N	179900	877800	http://www.bgs.ac.uk/data/britrocks/britrocks.cfc?method=viewSamples&sampleId=278086	http://www.largeimages.bgs.ac.uk/iip/britrocks.html?id=120000/121325	http://www.largeimages.bgs.ac.uk/iip/britrocks.html?id=120000/121324
278087										0	S1850	1850	1850	1850	Geikie,A.	*	'Original entry: Hornblende Schist'	1	Kerry Glen, Gairloch._x000D_SCOTLAND._x000D_Gairloch (91)	Gairloch (91)	NG 816 740	SCOTLAND						N	181600	874000	http://www.bgs.ac.uk/data/britrocks/britrocks.cfc?method=viewSamples&sampleId=278087	http://www.largeimages.bgs.ac.uk/iip/britrocks.html?id=120000/121327	http://www.largeimages.bgs.ac.uk/iip/britrocks.html?id=120000/121326
278088										0	S1851	1851	1851	1851	Geikie,A.	*	'Original entry: Calc. Hornblende-Biotite Schist'	1	4 miles S of Gairloch, Kerry Glen._x000D_SCOTLAND._x000D_Gairloch (91)	Gairloch (91)	NG 833 721	SCOTLAND						N	183300	872100	http://www.bgs.ac.uk/data/britrocks/britrocks.cfc?method=viewSamples&sampleId=278088	http://www.largeimages.bgs.ac.uk/iip/britrocks.html?id=120000/121329	http://www.largeimages.bgs.ac.uk/iip/britrocks.html?id=120000/121328
278089										0	S1852	1852	1852	1852	Geikie,A.	*	'Original entry: Biotite Schist'	1	Kerry Glen, Gairloch._x000D_SCOTLAND._x000D_Gairloch (91)	Gairloch (91)		SCOTLAND						N			http://www.bgs.ac.uk/data/britrocks/britrocks.cfc?method=viewSamples&sampleId=278089	http://www.largeimages.bgs.ac.uk/iip/britrocks.html?id=120000/121331	http://www.largeimages.bgs.ac.uk/iip/britrocks.html?id=120000/121330
278090										0	S1853	1853	1853	1853	Geikie,A.	*	'Original entry: Biotite Schist'	1	Kerry Glen, Gairloch._x000D_SCOTLAND._x000D_Gairloch (91)	Gairloch (91)		SCOTLAND						N			http://www.bgs.ac.uk/data/britrocks/britrocks.cfc?method=viewSamples&sampleId=278090	http://www.largeimages.bgs.ac.uk/iip/britrocks.html?id=120000/121333	http://www.largeimages.bgs.ac.uk/iip/britrocks.html?id=120000/121332
278091										0	S1854	1854	1854	1854	Geikie,A.	*	'Original entry: Epidote-Biotite Gneiss'	1	Kerry Glen, Gairloch._x000D_SCOTLAND._x000D_Gairloch (91)	Gairloch (91)		SCOTLAND						N			http://www.bgs.ac.uk/data/britrocks/britrocks.cfc?method=viewSamples&sampleId=278091	http://www.largeimages.bgs.ac.uk/iip/britrocks.html?id=120000/121335	http://www.largeimages.bgs.ac.uk/iip/britrocks.html?id=120000/121334
278092										0	S1855	1855	1855	1855	Geikie,A.	*	'Original entry: Hornblende Schist'	1	Kerry Glen, Gairloch._x000D_SCOTLAND._x000D_Gairloch (91)	Gairloch (91)		SCOTLAND						N			http://www.bgs.ac.uk/data/britrocks/britrocks.cfc?method=viewSamples&sampleId=278092	http://www.largeimages.bgs.ac.uk/iip/britrocks.html?id=120000/121337	http://www.largeimages.bgs.ac.uk/iip/britrocks.html?id=120000/121336
278093										0	S1856	1856	1856	1856	Geikie,A.	*	'Original entry: Biotite-Hornblende Schist'	1	Kerry Glen, Gairloch._x000D_SCOTLAND._x000D_Gairloch (91)	Gairloch (91)		SCOTLAND						N			http://www.bgs.ac.uk/data/britrocks/britrocks.cfc?method=viewSamples&sampleId=278093	http://www.largeimages.bgs.ac.uk/iip/britrocks.html?id=120000/121339	http://www.largeimages.bgs.ac.uk/iip/britrocks.html?id=120000/121338
278094										0	S1857	1857	1857	1857	Geikie,A.	*	'Original entry: Hornblende Schist'	1	Kerry Glen, Gairloch._x000D_SCOTLAND._x000D_Gairloch (91)	Gairloch (91)		SCOTLAND						N			http://www.bgs.ac.uk/data/britrocks/britrocks.cfc?method=viewSamples&sampleId=278094	http://www.largeimages.bgs.ac.uk/iip/britrocks.html?id=120000/121341	http://www.largeimages.bgs.ac.uk/iip/britrocks.html?id=120000/121340
278095										0	S1858	1858	1858	1858	Geikie,A.	*	'Original entry: Biotite Schist'	1	Kerry Glen, Gairloch._x000D_SCOTLAND._x000D_Gairloch (91)	Gairloch (91)		SCOTLAND		?gneiss, pebbly band in green schist				N			http://www.bgs.ac.uk/data/britrocks/britrocks.cfc?method=viewSamples&sampleId=278095	http://www.largeimages.bgs.ac.uk/iip/britrocks.html?id=120000/121343	http://www.largeimages.bgs.ac.uk/iip/britrocks.html?id=120000/121342
282886										0	S1859; S1859/a;	1859	1859	1859	Geikie,A.	*		0	Vitrified Fort, Burry Hill, Alyth._x000D_SCOTLAND._x000D_Blairgowrie (56)	Blairgowrie (56)	NO 263 504	SCOTLAND		2 slides				N	326300	750400	http://www.bgs.ac.uk/data/britrocks/britrocks.cfc?method=viewSamples&sampleId=282886	http://www.largeimages.bgs.ac.uk/iip/britrocks.html?id=120000/121345	http://www.largeimages.bgs.ac.uk/iip/britrocks.html?id=120000/121344	http://www.largeimages.bgs.ac.uk/iip/britrocks.html?id=120000/121347	http://www.largeimages.bgs.ac.uk/iip/britrocks.html?id=120000/121346
397667	X									0	S1860; S1860/a;	1860	1860	1860	Geikie,A.	*	'Original entry: Quartz-Trachyte'	1	Dirleton Quarry, North Berwick._x000D_Haddington (33)	Haddington (33)	NT 507 834			Quartz-trachyte; east lothian mem., pp. 127 - 128				N	350700	683400	http://www.bgs.ac.uk/data/britrocks/britrocks.cfc?method=viewSamples&sampleId=397667	http://www.largeimages.bgs.ac.uk/iip/britrocks.html?id=120000/121349	http://www.largeimages.bgs.ac.uk/iip/britrocks.html?id=120000/121348	http://www.largeimages.bgs.ac.uk/iip/britrocks.html?id=120000/121351	http://www.largeimages.bgs.ac.uk/iip/britrocks.html?id=120000/121350
284964										0	S1972	1972	1972	1972	Geikie,A.	*	'Original entry: Granite'	1	Ardclach, Nairn._x000D_SCOTLAND._x000D_Nairn (84)	Nairn (84)	NH 956 452	SCOTLAND		Specimen missing; 2 micas and microcline				N	295600	845200	http://www.bgs.ac.uk/data/britrocks/britrocks.cfc?method=viewSamples&sampleId=284964	http://www.largeimages.bgs.ac.uk/iip/britrocks.html?id=120000/121575	http://www.largeimages.bgs.ac.uk/iip/britrocks.html?id=120000/121574
398987		X								0	S1973	1973	1973	1973	Geikie,A.	*	'Original entry: Limestone F'	1	Raw Camps Quarry, Mid Calder._x000D_Edinburgh (32)	Edinburgh (32)	NT 102 683							N	310200	668300	http://www.bgs.ac.uk/data/britrocks/britrocks.cfc?method=viewSamples&sampleId=398987	http://www.largeimages.bgs.ac.uk/iip/britrocks.html?id=120000/121577	http://www.largeimages.bgs.ac.uk/iip/britrocks.html?id=120000/121576
384100						X				0	S1974	1974	1974	1974	Geikie,A.	*	'Original entry: Fibrous Calcite'	1	Shore E of North Berwick._x000D_SCOTLAND._x000D_North Berwick (41)	North Berwick (41)	NT 56 85	SCOTLAND						N	356000	685000	http://www.bgs.ac.uk/data/britrocks/britrocks.cfc?method=viewSamples&sampleId=384100	http://www.largeimages.bgs.ac.uk/iip/britrocks.html?id=120000/121579	http://www.largeimages.bgs.ac.uk/iip/britrocks.html?id=120000/121578
382694						X				0	S1995	1995	1995	1995	Geikie,A.	*	'Original entry: Grit'	1	Tyrie Works, Shore, Kirkcaldy._x000D_SCOTLAND._x000D_Kinross (40)	Kinross (40)	NT 2796 8919	SCOTLAND						N	327960	689190	http://www.bgs.ac.uk/data/britrocks/britrocks.cfc?method=viewSamples&sampleId=382694	http://www.largeimages.bgs.ac.uk/iip/britrocks.html?id=120000/122499	http://www.largeimages.bgs.ac.uk/iip/britrocks.html?id=120000/122498
382695						X				0	S1996	1996	1996	1996	Geikie,A.	*	'Original entry: Grit'	1	Tyrie Works, Shore, Kirkcaldy._x000D_SCOTLAND._x000D_Kinross (40)	Kinross (40)	NT 2796 8919	SCOTLAND						N	327960	689190	http://www.bgs.ac.uk/data/britrocks/britrocks.cfc?method=viewSamples&sampleId=382695	http://www.largeimages.bgs.ac.uk/iip/britrocks.html?id=120000/122501	http://www.largeimages.bgs.ac.uk/iip/britrocks.html?id=120000/122500
382696						X				0	S1997	1997	1997	1997	Geikie,A.	*	'Original entry: Basalt (Rotten)'	1	Tyrie Works, Shore, Kirkcaldy._x000D_SCOTLAND._x000D_Kinross (40)	Kinross (40)	NT 2796 8919	SCOTLAND						N	327960	689190	http://www.bgs.ac.uk/data/britrocks/britrocks.cfc?method=viewSamples&sampleId=382696	http://www.largeimages.bgs.ac.uk/iip/britrocks.html?id=120000/122503	http://www.largeimages.bgs.ac.uk/iip/britrocks.html?id=120000/122502
382697						X				0	S1998	1998	1998	1998	Geikie,A.	*	'Original entry: Ophitic Dolerite'	1	Lammerlaws, Burntisland._x000D_SCOTLAND._x000D_Kinross (40)	Kinross (40)	NT 239 857	SCOTLAND						N	323900	685700	http://www.bgs.ac.uk/data/britrocks/britrocks.cfc?method=viewSamples&sampleId=382697	http://www.largeimages.bgs.ac.uk/iip/britrocks.html?id=120000/122505	http://www.largeimages.bgs.ac.uk/iip/britrocks.html?id=120000/122504
232038								X		2	S2002; COLLNORYF1511;	2002	2002	2002	Geikie,A.	*	'Original entry: Pyroxene Granulite'	1	Scourie._x000D_SCOTLAND._x000D_Lochinver (107)	Lochinver (107)	NC 15 44	SCOTLAND		Garnets				N	215000	944000	http://www.bgs.ac.uk/data/britrocks/britrocks.cfc?method=viewSamples&sampleId=232038	http://www.largeimages.bgs.ac.uk/iip/britrocks.html?id=120000/122515	http://www.largeimages.bgs.ac.uk/iip/britrocks.html?id=120000/122514
370594										0	S2003	2003	2003	2003	Geikie,A.	*	'Original entry: Biotite Granite'	1	Loch Etive._x000D_SCOTLAND._x000D_Oban (45)	Oban (45)	NN 0 3	SCOTLAND		Boulder				N	200000	730000	http://www.bgs.ac.uk/data/britrocks/britrocks.cfc?method=viewSamples&sampleId=370594	http://www.largeimages.bgs.ac.uk/iip/britrocks.html?id=120000/122517	http://www.largeimages.bgs.ac.uk/iip/britrocks.html?id=120000/122516
371817				X						0	S2004	2004	2004	2004	Geikie,A.	*	'Original entry: Dolerite'	1	Oban._x000D_SCOTLAND._x000D_Mull (44)	Mull (44)	NM 8568 2914	SCOTLAND		Intrusion				N	185680	729140	http://www.bgs.ac.uk/data/britrocks/britrocks.cfc?method=viewSamples&sampleId=371817	http://www.largeimages.bgs.ac.uk/iip/britrocks.html?id=120000/122519	http://www.largeimages.bgs.ac.uk/iip/britrocks.html?id=120000/122518
371818				X						0	S2005	2005	2005	2005	Geikie,A.	*	'Original entry: Felsite'	1	Near ferry house, Kerrera._x000D_SCOTLAND._x000D_Mull (44)	Mull (44)	NM 830 286	SCOTLAND		Nw dyke. for complete list of lavas in sheets 43 & 44, see vol. xiv, pp. 58-88				N	183000	728600	http://www.bgs.ac.uk/data/britrocks/britrocks.cfc?method=viewSamples&sampleId=371818	http://www.largeimages.bgs.ac.uk/iip/britrocks.html?id=120000/122521	http://www.largeimages.bgs.ac.uk/iip/britrocks.html?id=120000/122520
268231										0	S2006	2006	2006	2006	Geikie,A.	*	'Original entry: Cipolin'	1	Glen Gairn, NW of Ballater._x000D_SCOTLAND._x000D_Tomintoul (75)	Tomintoul (75)	NJ 304 007	SCOTLAND						N	330400	800700	http://www.bgs.ac.uk/data/britrocks/britrocks.cfc?method=viewSamples&sampleId=268231	http://www.largeimages.bgs.ac.uk/iip/britrocks.html?id=120000/122523	http://www.largeimages.bgs.ac.uk/iip/britrocks.html?id=120000/122522
262253										0	S2007	2007	2007	2007	Geikie,A.	*	'Original entry: Microgranite'	1	Side of Lochnagar._x000D_SCOTLAND._x000D_Balmoral (65)	Balmoral (65)	NO 24 86	SCOTLAND		Vein in granite				N	324000	786000	http://www.bgs.ac.uk/data/britrocks/britrocks.cfc?method=viewSamples&sampleId=262253	http://www.largeimages.bgs.ac.uk/iip/britrocks.html?id=120000/122525	http://www.largeimages.bgs.ac.uk/iip/britrocks.html?id=120000/122524
262254										0	S2008	2008	2008	2008	Geikie,A.	*	'Original entry: Quartz Porphyry'	1	Old Mar Lodge, above Braemar._x000D_SCOTLAND._x000D_Balmoral (65)	Balmoral (65)	NO 108 894	SCOTLAND						N	310800	789400	http://www.bgs.ac.uk/data/britrocks/britrocks.cfc?method=viewSamples&sampleId=262254	http://www.largeimages.bgs.ac.uk/iip/britrocks.html?id=120000/122527	http://www.largeimages.bgs.ac.uk/iip/britrocks.html?id=120000/122526
370595										0	S2009	2009	2009	2009	Geikie,A.	*	'Original entry: Grit'	1	Vitrified Fort, Beregonium._x000D_SCOTLAND._x000D_Oban (45)	Oban (45)	NM 9027 3817	SCOTLAND						N	190270	738170	http://www.bgs.ac.uk/data/britrocks/britrocks.cfc?method=viewSamples&sampleId=370595	http://www.largeimages.bgs.ac.uk/iip/britrocks.html?id=120000/122529	http://www.largeimages.bgs.ac.uk/iip/britrocks.html?id=120000/122528
268232										0	S2010	2010	2010	2010	Geikie,A.	*	'Original entry: Cipolin'	1	Roadside near Rinloan Moss, 5.5 miles NW of Ballater._x000D_SCOTLAND._x000D_Tomintoul (75)	Tomintoul (75)	NJ 295 007	SCOTLAND						N	329500	800700	http://www.bgs.ac.uk/data/britrocks/britrocks.cfc?method=viewSamples&sampleId=268232	http://www.largeimages.bgs.ac.uk/iip/britrocks.html?id=120000/122531	http://www.largeimages.bgs.ac.uk/iip/britrocks.html?id=120000/122530
262236										0	S2011	2011	2011	2011	Geikie,A.	*	'Original entry: Crystalline Limestone'	1	SW side of Braemar village._x000D_SCOTLAND._x000D_Balmoral (65)	Balmoral (65)	NO 145 910	SCOTLAND						N	314500	791000	http://www.bgs.ac.uk/data/britrocks/britrocks.cfc?method=viewSamples&sampleId=262236	http://www.largeimages.bgs.ac.uk/iip/britrocks.html?id=120000/122533	http://www.largeimages.bgs.ac.uk/iip/britrocks.html?id=120000/122532
262237										0	S2012	2012	2012	2012	Geikie,A.	*	'Original entry: Biotite Amphibolite'	1	Lochnagar._x000D_SCOTLAND._x000D_Balmoral (65)	Balmoral (65)	NO 24 86	SCOTLAND		Mass enclosed in granite				N	324000	786000	http://www.bgs.ac.uk/data/britrocks/britrocks.cfc?method=viewSamples&sampleId=262237	http://www.largeimages.bgs.ac.uk/iip/britrocks.html?id=120000/122535	http://www.largeimages.bgs.ac.uk/iip/britrocks.html?id=120000/122534
371819				X						0	S2014	2014	2014	2014	Geikie,A.	*	'Original entry: Tuff (Grit)'	1	Oban._x000D_SCOTLAND._x000D_Mull (44)	Mull (44)	NM 855 297	SCOTLAND		L ors; pre-tertiary mem, p. 27				N	185500	729700	http://www.bgs.ac.uk/data/britrocks/britrocks.cfc?method=viewSamples&sampleId=371819	http://www.largeimages.bgs.ac.uk/iip/britrocks.html?id=120000/122539	http://www.largeimages.bgs.ac.uk/iip/britrocks.html?id=120000/122538
398992		X								0	S2038	2038	2038	2038	Geikie,A.	*	'Original entry: Picrite F'	1	SW end of Inchcolm Island._x000D_Edinburgh (32)	Edinburgh (32)	NT 1864 8230							N	318640	682300	http://www.bgs.ac.uk/data/britrocks/britrocks.cfc?method=viewSamples&sampleId=398992	http://www.largeimages.bgs.ac.uk/iip/britrocks.html?id=120000/122587	http://www.largeimages.bgs.ac.uk/iip/britrocks.html?id=120000/122586
398993		X								0	S2039	2039	2039	2039	Geikie,A.	*	'Original entry: Analcime Olivine Dolerite F'	1	SE end of Inchcolm Island._x000D_Edinburgh (32)	Edinburgh (32)	NT 1928 8252			Teschenite f vein rock				N	319280	682520	http://www.bgs.ac.uk/data/britrocks/britrocks.cfc?method=viewSamples&sampleId=398993	http://www.largeimages.bgs.ac.uk/iip/britrocks.html?id=120000/122589	http://www.largeimages.bgs.ac.uk/iip/britrocks.html?id=120000/122588
398994		X								0	S2040	2040	2040	2040	Geikie,A.	*	'Original entry: Analcime Olivine Dolerite F'	1	SE end of Inchcolm Island._x000D_Edinburgh (32)	Edinburgh (32)	NT 1928 8252			Teschenite f vein rock				N	319280	682520	http://www.bgs.ac.uk/data/britrocks/britrocks.cfc?method=viewSamples&sampleId=398994	http://www.largeimages.bgs.ac.uk/iip/britrocks.html?id=120000/122591	http://www.largeimages.bgs.ac.uk/iip/britrocks.html?id=120000/122590
398995		X								0	S2041	2041	2041	2041	Geikie,A.	*	'Original entry: Dolerite, Probably Related To Teschenite F'	1	Hawkcraig Wooden Pier, Aberdour._x000D_Edinburgh (32)	Edinburgh (32)	NT 1982 8490							N	319820	684900	http://www.bgs.ac.uk/data/britrocks/britrocks.cfc?method=viewSamples&sampleId=398995	http://www.largeimages.bgs.ac.uk/iip/britrocks.html?id=120000/122593	http://www.largeimages.bgs.ac.uk/iip/britrocks.html?id=120000/122592
398996		X								0	S2042	2042	2042	2042	Geikie,A.	*	'Original entry: Dolerite, Probably Related To Teschenite F'	1	Hawkcraig Wooden Pier, Aberdour._x000D_Edinburgh (32)	Edinburgh (32)	NT 1982 8490							N	319820	684900	http://www.bgs.ac.uk/data/britrocks/britrocks.cfc?method=viewSamples&sampleId=398996	http://www.largeimages.bgs.ac.uk/iip/britrocks.html?id=120000/122595	http://www.largeimages.bgs.ac.uk/iip/britrocks.html?id=120000/122594
398997		X								0	S2043	2043	2043	2043	Geikie,A.	*	'Original entry: Dolerite, Probably Related To Teschenite F'	1	Uppermost part of Inchmickery._x000D_Edinburgh (32)	Edinburgh (32)	NT 2068 8056			Teschenite f with veins of (a)				N	320680	680560	http://www.bgs.ac.uk/data/britrocks/britrocks.cfc?method=viewSamples&sampleId=398997	http://www.largeimages.bgs.ac.uk/iip/britrocks.html?id=120000/122597	http://www.largeimages.bgs.ac.uk/iip/britrocks.html?id=120000/122596
398998		X								0	S2044	2044	2044	2044	Geikie,A.	*	'Original entry: Vein Intersecting Dolerite Of S 2041 - 2043. F'	1	Uppermost part of Inchmickery._x000D_Edinburgh (32)	Edinburgh (32)	NT 2068 8056			Vein (a) running through upper part (b)				N	320680	680560	http://www.bgs.ac.uk/data/britrocks/britrocks.cfc?method=viewSamples&sampleId=398998	http://www.largeimages.bgs.ac.uk/iip/britrocks.html?id=120000/122599	http://www.largeimages.bgs.ac.uk/iip/britrocks.html?id=120000/122598
398999		X								0	S2045	2045	2045	2045	Geikie,A.	*	'Original entry: Vein Intersecting Dolerite Of S 2041 - 2043.'	1	Uppermost part of Inchmickery._x000D_Edinburgh (32)	Edinburgh (32)	NT 2068 8056			Segregation vein in central part of rock. more feldspathic than main mass and less ferromagnesian minerals a				N	320680	680560	http://www.bgs.ac.uk/data/britrocks/britrocks.cfc?method=viewSamples&sampleId=398999	http://www.largeimages.bgs.ac.uk/iip/britrocks.html?id=120000/122601	http://www.largeimages.bgs.ac.uk/iip/britrocks.html?id=120000/122600
399000		X								0	S2046	2046	2046	2046	Geikie,A.	*	'Original entry: Quartz Dolerite F'	1	Oxcars (Beacon reef), Firth of Forth._x000D_Edinburgh (32)	Edinburgh (32)	NT 2029 8181							N	320290	681810	http://www.bgs.ac.uk/data/britrocks/britrocks.cfc?method=viewSamples&sampleId=399000	http://www.largeimages.bgs.ac.uk/iip/britrocks.html?id=120000/122603	http://www.largeimages.bgs.ac.uk/iip/britrocks.html?id=120000/122602
399085		X								0	S2047	2047	2047	2047	Geikie,A.	*	'Original entry: Chilled Edge Of Diabase And Shale F'	1	Included shale in rock of Inchmickery._x000D_Edinburgh (32)	Edinburgh (32)	NT 2069 8060							N	320690	680600	http://www.bgs.ac.uk/data/britrocks/britrocks.cfc?method=viewSamples&sampleId=399085	http://www.largeimages.bgs.ac.uk/iip/britrocks.html?id=120000/122605	http://www.largeimages.bgs.ac.uk/iip/britrocks.html?id=120000/122604
399086		X								0	S2048	2048	2048	2048	Geikie,A.	*	'Original entry: Chilled Edge Of Diabase And Shale F'	1	Shale from band in rock of Inchmickery._x000D_Edinburgh (32)	Edinburgh (32)	NT 2069 8060							N	320690	680600	http://www.bgs.ac.uk/data/britrocks/britrocks.cfc?method=viewSamples&sampleId=399086	http://www.largeimages.bgs.ac.uk/iip/britrocks.html?id=120000/122607	http://www.largeimages.bgs.ac.uk/iip/britrocks.html?id=120000/122606
399087		X								0	S2049	2049	2049	2049	Geikie,A.	*	'Original entry: Analcime Olivine Dolerite F'	1	Car Craig, Firth of Forth._x000D_Edinburgh (32)	Edinburgh (32)	NT 1991 8306			Teschenite f				N	319910	683060	http://www.bgs.ac.uk/data/britrocks/britrocks.cfc?method=viewSamples&sampleId=399087	http://www.largeimages.bgs.ac.uk/iip/britrocks.html?id=120000/122609	http://www.largeimages.bgs.ac.uk/iip/britrocks.html?id=120000/122608
399088		X								0	S2050	2050	2050	2050	Geikie,A.	*	'Original entry: Olivine Dolerite F'	1	Lower part of Inchmickery, W side._x000D_Edinburgh (32)	Edinburgh (32)	NT 2064 8052							N	320640	680520	http://www.bgs.ac.uk/data/britrocks/britrocks.cfc?method=viewSamples&sampleId=399088	http://www.largeimages.bgs.ac.uk/iip/britrocks.html?id=120000/122611	http://www.largeimages.bgs.ac.uk/iip/britrocks.html?id=120000/122610
232039								X		3	S2063; S2063/a; COLLNORYF1512;	2063	2063	2063	Geikie,A.	*	'Original entry: Hornblende-Pyroxene Granulite'	1	Scourie._x000D_SCOTLAND._x000D_Lochinver (107)	Lochinver (107)	NC 15 44	SCOTLAND		Deep brown hornblende				N	215000	944000	http://www.bgs.ac.uk/data/britrocks/britrocks.cfc?method=viewSamples&sampleId=232039	http://www.largeimages.bgs.ac.uk/iip/britrocks.html?id=120000/122637	http://www.largeimages.bgs.ac.uk/iip/britrocks.html?id=120000/122636	http://www.largeimages.bgs.ac.uk/iip/britrocks.html?id=120000/122639	http://www.largeimages.bgs.ac.uk/iip/britrocks.html?id=120000/122638
232040								X		2	S2064; COLLNORYF1513;	2064	2064	2064	Geikie,A.	*	'Original entry: Hornblende-Pyroxene Granulite'	1	Scourie._x000D_SCOTLAND._x000D_Lochinver (107)	Lochinver (107)	NC 15 44	SCOTLAND						N	215000	944000	http://www.bgs.ac.uk/data/britrocks/britrocks.cfc?method=viewSamples&sampleId=232040	http://www.largeimages.bgs.ac.uk/iip/britrocks.html?id=120000/122641	http://www.largeimages.bgs.ac.uk/iip/britrocks.html?id=120000/122640
232041								X		2	S2065; COLLNORYF1514;	2065	2065	2065	Geikie,A.	*	'Original entry: Hornblende-Biotite Rock'	1	Scourie._x000D_SCOTLAND._x000D_Lochinver (107)	Lochinver (107)	NC 15 44	SCOTLAND						N	215000	944000	http://www.bgs.ac.uk/data/britrocks/britrocks.cfc?method=viewSamples&sampleId=232041	http://www.largeimages.bgs.ac.uk/iip/britrocks.html?id=120000/122643	http://www.largeimages.bgs.ac.uk/iip/britrocks.html?id=120000/122642
232042								X		2	S2066; COLLNORYF1515;	2066	2066	2066	Geikie,A.	*	'Original entry: Quartz-Feldspar Rock'	1	Scourie._x000D_SCOTLAND._x000D_Lochinver (107)	Lochinver (107)	NC 15 44	SCOTLAND						N	215000	944000	http://www.bgs.ac.uk/data/britrocks/britrocks.cfc?method=viewSamples&sampleId=232042	http://www.largeimages.bgs.ac.uk/iip/britrocks.html?id=120000/122645	http://www.largeimages.bgs.ac.uk/iip/britrocks.html?id=120000/122644
232043								X		2	S2067; COLLNORYF1516;	2067	2067	2067	Geikie,A.	*	'Original entry: Granulite'	1	N side of Kylesku._x000D_SCOTLAND._x000D_Lochinver (107)	Lochinver (107)	NC 229 343	SCOTLAND		Microperthite				N	222900	934300	http://www.bgs.ac.uk/data/britrocks/britrocks.cfc?method=viewSamples&sampleId=232043	http://www.largeimages.bgs.ac.uk/iip/britrocks.html?id=120000/122647	http://www.largeimages.bgs.ac.uk/iip/britrocks.html?id=120000/122646
232044								X		2	S2068; COLLNORYF1517;	2068	2068	2068	Geikie,A.	*	'Original entry: Granulite'	1	Scourie._x000D_SCOTLAND._x000D_Lochinver (107)	Lochinver (107)	NC 15 44	SCOTLAND		Microperthite				N	215000	944000	http://www.bgs.ac.uk/data/britrocks/britrocks.cfc?method=viewSamples&sampleId=232044	http://www.largeimages.bgs.ac.uk/iip/britrocks.html?id=120000/122649	http://www.largeimages.bgs.ac.uk/iip/britrocks.html?id=120000/122648
232045								X		2	S2070; COLLNORYF1518;	2070	2070	2070	Geikie,A.	*	'Original entry: Camptonite'	1	Loch Assynt._x000D_SCOTLAND._x000D_Lochinver (107)	Lochinver (107)	NC	SCOTLAND		Intrusive in limestone				N	200000	900000	http://www.bgs.ac.uk/data/britrocks/britrocks.cfc?method=viewSamples&sampleId=232045	http://www.largeimages.bgs.ac.uk/iip/britrocks.html?id=120000/122653	http://www.largeimages.bgs.ac.uk/iip/britrocks.html?id=120000/122652
232046								X		2	S2071; COLLNORYF1519;	2071	2071	2071	Geikie,A.	*	'Original entry: Hornblende Gneiss'	1	Loch Assynt._x000D_SCOTLAND._x000D_Lochinver (107)	Lochinver (107)	NC	SCOTLAND		Intrusive rock				N	200000	900000	http://www.bgs.ac.uk/data/britrocks/britrocks.cfc?method=viewSamples&sampleId=232046	http://www.largeimages.bgs.ac.uk/iip/britrocks.html?id=120000/122655	http://www.largeimages.bgs.ac.uk/iip/britrocks.html?id=120000/122654
232047								X		2	S2072; COLLNORYF1520;	2072	2072	2072	Geikie,A.	*	'Original entry: Camptonite'	1	Glasven, Assynt._x000D_SCOTLAND._x000D_Lochinver (107)	Lochinver (107)	NC 25 26	SCOTLAND						N	225000	926000	http://www.bgs.ac.uk/data/britrocks/britrocks.cfc?method=viewSamples&sampleId=232047	http://www.largeimages.bgs.ac.uk/iip/britrocks.html?id=120000/122657	http://www.largeimages.bgs.ac.uk/iip/britrocks.html?id=120000/122656
284402										0	S2073	2073	2073	2073	Geikie,A.	*	'Original entry: Andalusite And Cordierite-Bearing Pelitic Mica Schist'	1	Correen Quarry, Alford._x000D_SCOTLAND._x000D_Inverurie (76)	Inverurie (76)	NJ 523 213	SCOTLAND						N	352300	821300	http://www.bgs.ac.uk/data/britrocks/britrocks.cfc?method=viewSamples&sampleId=284402	http://www.largeimages.bgs.ac.uk/iip/britrocks.html?id=120000/122659	http://www.largeimages.bgs.ac.uk/iip/britrocks.html?id=120000/122658
285136										0	S2074	2074	2074	2074	Geikie,A.	*	'Original entry: Mica Schist'	1	Haughs Quarry, Keith._x000D_SCOTLAND._x000D_Rothes (85)	Rothes (85)	NJ 4265 5010	SCOTLAND		Hydromica schist; mem. sh. 85, p. 22				N	342650	850100	http://www.bgs.ac.uk/data/britrocks/britrocks.cfc?method=viewSamples&sampleId=285136	http://www.largeimages.bgs.ac.uk/iip/britrocks.html?id=120000/122661	http://www.largeimages.bgs.ac.uk/iip/britrocks.html?id=120000/122660
284403										0	S2075	2075	2075	2075	Geikie,A.	*	'Original entry: Hornblende Schist'	1	Railway cutting , Tillyfourie._x000D_SCOTLAND._x000D_Inverurie (76)	Inverurie (76)	NJ 639 126	SCOTLAND						N	363900	812600	http://www.bgs.ac.uk/data/britrocks/britrocks.cfc?method=viewSamples&sampleId=284403	http://www.largeimages.bgs.ac.uk/iip/britrocks.html?id=120000/122663	http://www.largeimages.bgs.ac.uk/iip/britrocks.html?id=120000/122662
284404										0	S2076; S2076/a;	2076	2076	2076	Geikie,A.	*	'Original entry: Epidiorite'	1	Railway cutting , Tillyfourie._x000D_SCOTLAND._x000D_Inverurie (76)	Inverurie (76)	NJ 639 126	SCOTLAND		Fluxion or cataclastic structure. vein in granite. green hornblende and greenish-brown biotite, granular sphene and zoned plagioclase				N	363900	812600	http://www.bgs.ac.uk/data/britrocks/britrocks.cfc?method=viewSamples&sampleId=284404	http://www.largeimages.bgs.ac.uk/iip/britrocks.html?id=120000/122665	http://www.largeimages.bgs.ac.uk/iip/britrocks.html?id=120000/122664	http://www.largeimages.bgs.ac.uk/iip/britrocks.html?id=120000/122667	http://www.largeimages.bgs.ac.uk/iip/britrocks.html?id=120000/122666
285137										0	S2077	2077	2077	2077	Geikie,A.	*	'Original entry: Biotite Gneiss'	1	Craigellachie cutting._x000D_SCOTLAND._x000D_Rothes (85)	Rothes (85)	NJ 296 449	SCOTLAND		Granitoid band in altered feldspathic grit; mem. sh. 85, p. 32				N	329600	844900	http://www.bgs.ac.uk/data/britrocks/britrocks.cfc?method=viewSamples&sampleId=285137	http://www.largeimages.bgs.ac.uk/iip/britrocks.html?id=120000/122669	http://www.largeimages.bgs.ac.uk/iip/britrocks.html?id=120000/122668
285138										0	S2078	2078	2078	2078	Geikie,A.	*	'Original entry: Biotite Gneiss'	1	Craigellachie cutting._x000D_SCOTLAND._x000D_Rothes (85)	Rothes (85)	NJ 296 449	SCOTLAND		Granitoid band in altered feldspathic grit; mem. sh. 85, p. 32				N	329600	844900	http://www.bgs.ac.uk/data/britrocks/britrocks.cfc?method=viewSamples&sampleId=285138	http://www.largeimages.bgs.ac.uk/iip/britrocks.html?id=120000/122671	http://www.largeimages.bgs.ac.uk/iip/britrocks.html?id=120000/122670
266602								X		0	S2079	2079	2079	2079	Geikie,A.	*	'Original entry: Quartz-Feldspar Grit'	1	Loggie, Loch Broom._x000D_SCOTLAND._x000D_Ullapool (101)	Ullapool (101)	NH 14 90	SCOTLAND		Unaltered				N	214000	890000	http://www.bgs.ac.uk/data/britrocks/britrocks.cfc?method=viewSamples&sampleId=266602	http://www.largeimages.bgs.ac.uk/iip/britrocks.html?id=120000/122673	http://www.largeimages.bgs.ac.uk/iip/britrocks.html?id=120000/122672
266603								X		0	S2080	2080	2080	2080	Geikie,A.	*	'Original entry: Quartz-Feldspar Grit (Altered)'	1	Loggie, Loch Broom._x000D_SCOTLAND._x000D_Ullapool (101)	Ullapool (101)	NH 14 90	SCOTLAND		Cataclastic				N	214000	890000	http://www.bgs.ac.uk/data/britrocks/britrocks.cfc?method=viewSamples&sampleId=266603	http://www.largeimages.bgs.ac.uk/iip/britrocks.html?id=120000/122675	http://www.largeimages.bgs.ac.uk/iip/britrocks.html?id=120000/122674
266604								X		0	S2081	2081	2081	2081	Geikie,A.	*	'Original entry: Quartz-Feldspar Grit (Altered)'	1	Loggie, Loch Broom._x000D_SCOTLAND._x000D_Ullapool (101)	Ullapool (101)	NH 14 90	SCOTLAND		Cataclastic				N	214000	890000	http://www.bgs.ac.uk/data/britrocks/britrocks.cfc?method=viewSamples&sampleId=266604	http://www.largeimages.bgs.ac.uk/iip/britrocks.html?id=120000/122677	http://www.largeimages.bgs.ac.uk/iip/britrocks.html?id=120000/122676
266605								X		0	S2082	2082	2082	2082	Geikie,A.	*	'Original entry: Quartz-Feldspar Grit (Altered)'	1	Loggie, Loch Broom._x000D_SCOTLAND._x000D_Ullapool (101)	Ullapool (101)	NH 14 90	SCOTLAND		Cataclastic				N	214000	890000	http://www.bgs.ac.uk/data/britrocks/britrocks.cfc?method=viewSamples&sampleId=266605	http://www.largeimages.bgs.ac.uk/iip/britrocks.html?id=120000/122679	http://www.largeimages.bgs.ac.uk/iip/britrocks.html?id=120000/122678
266606								X		0	S2083	2083	2083	2083	Geikie,A.	*	'Original entry: Quartz-Feldspar Grit (Altered)'	1	Loggie, Loch Broom._x000D_SCOTLAND._x000D_Ullapool (101)	Ullapool (101)	NH 14 90	SCOTLAND		Cataclastic				N	214000	890000	http://www.bgs.ac.uk/data/britrocks/britrocks.cfc?method=viewSamples&sampleId=266606	http://www.largeimages.bgs.ac.uk/iip/britrocks.html?id=120000/122681	http://www.largeimages.bgs.ac.uk/iip/britrocks.html?id=120000/122680
266607								X		0	S2084	2084	2084	2084	Geikie,A.	*	'Original entry: ? Gneiss'	1	Loggie, Loch Broom._x000D_SCOTLAND._x000D_Ullapool (101)	Ullapool (101)	NH 14 90	SCOTLAND		One yards from s.2083				N	214000	890000	http://www.bgs.ac.uk/data/britrocks/britrocks.cfc?method=viewSamples&sampleId=266607	http://www.largeimages.bgs.ac.uk/iip/britrocks.html?id=120000/122683	http://www.largeimages.bgs.ac.uk/iip/britrocks.html?id=120000/122682
266608								X		0	S2085	2085	2085	2085	Geikie,A.	*	'Original entry: Chlorite, Calcareous Schist'	1	Loggie, Loch Broom._x000D_SCOTLAND._x000D_Ullapool (101)	Ullapool (101)	NH 14 90	SCOTLAND		'felstone'				N	214000	890000	http://www.bgs.ac.uk/data/britrocks/britrocks.cfc?method=viewSamples&sampleId=266608	http://www.largeimages.bgs.ac.uk/iip/britrocks.html?id=120000/122685	http://www.largeimages.bgs.ac.uk/iip/britrocks.html?id=120000/122684
266609								X		0	S2086	2086	2086	2086	Geikie,A.	*	'Original entry: Quartz-Feldspar Grit'	1	Right Bank of Auchalt River._x000D_SCOTLAND._x000D_Ullapool (101)	Ullapool (101)	NH 23 94	SCOTLAND						N	223000	894000	http://www.bgs.ac.uk/data/britrocks/britrocks.cfc?method=viewSamples&sampleId=266609	http://www.largeimages.bgs.ac.uk/iip/britrocks.html?id=120000/122687	http://www.largeimages.bgs.ac.uk/iip/britrocks.html?id=120000/122686
266610								X		0	S2087	2087	2087	2087	Geikie,A.	*	'Original entry: Calcareous Grit'	1	Right Bank of Auchalt River._x000D_SCOTLAND._x000D_Ullapool (101)	Ullapool (101)	NH 23 94	SCOTLAND		Cataclastic				N	223000	894000	http://www.bgs.ac.uk/data/britrocks/britrocks.cfc?method=viewSamples&sampleId=266610	http://www.largeimages.bgs.ac.uk/iip/britrocks.html?id=120000/122689	http://www.largeimages.bgs.ac.uk/iip/britrocks.html?id=120000/122688
266611								X		0	S2088	2088	2088	2088	Geikie,A.	*	'Original entry: Grit'	1	Right Bank of Auchalt River._x000D_SCOTLAND._x000D_Ullapool (101)	Ullapool (101)	NH 23 94	SCOTLAND		Cataclastic				N	223000	894000	http://www.bgs.ac.uk/data/britrocks/britrocks.cfc?method=viewSamples&sampleId=266611	http://www.largeimages.bgs.ac.uk/iip/britrocks.html?id=120000/122691	http://www.largeimages.bgs.ac.uk/iip/britrocks.html?id=120000/122690
266612								X		0	S2089	2089	2089	2089	Geikie,A.	*	'Original entry: Amphibolite'	1	Right Bank of Auchalt River._x000D_SCOTLAND._x000D_Ullapool (101)	Ullapool (101)	NH 23 94	SCOTLAND		Zoned ores				N	223000	894000	http://www.bgs.ac.uk/data/britrocks/britrocks.cfc?method=viewSamples&sampleId=266612	http://www.largeimages.bgs.ac.uk/iip/britrocks.html?id=120000/122693	http://www.largeimages.bgs.ac.uk/iip/britrocks.html?id=120000/122692
266613								X		0	S2090	2090	2090	2090	Geikie,A.	*	'Original entry: Camptonite'	1	Auchalt Valley._x000D_SCOTLAND._x000D_Ullapool (101)	Ullapool (101)	NH 23 94	SCOTLAND		In the 'logan rock'				N	223000	894000	http://www.bgs.ac.uk/data/britrocks/britrocks.cfc?method=viewSamples&sampleId=266613	http://www.largeimages.bgs.ac.uk/iip/britrocks.html?id=120000/122695	http://www.largeimages.bgs.ac.uk/iip/britrocks.html?id=120000/122694
285139										0	S2091	2091	2091	2091	Geikie,A.	*	'Original entry: Black Actinolite Schist'	1	Boharm, 5 miles W of Keith._x000D_SCOTLAND._x000D_Rothes (85)	Rothes (85)	NJ 383 495	SCOTLAND		Younger schists; mem. sh. 85, pp. 19, 50				N	338300	849500	http://www.bgs.ac.uk/data/britrocks/britrocks.cfc?method=viewSamples&sampleId=285139	http://www.largeimages.bgs.ac.uk/iip/britrocks.html?id=120000/122697	http://www.largeimages.bgs.ac.uk/iip/britrocks.html?id=120000/122696
285264										0	S2092	2092	2092	2092	Geikie,A.; Horne, J.;	*; *;	'Original entry: Silicified Oolite'	1	Spynie._x000D_SCOTLAND._x000D_Elgin (95)	Elgin (95)	NJ 224 656	SCOTLAND						N	322400	865600	http://www.bgs.ac.uk/data/britrocks/britrocks.cfc?method=viewSamples&sampleId=285264	http://www.largeimages.bgs.ac.uk/iip/britrocks.html?id=120000/122699	http://www.largeimages.bgs.ac.uk/iip/britrocks.html?id=120000/122698
371820				X						0	S2093	2093	2093	2093	Geikie,A.	*	'Original entry: Augite Granophyre'	1	Allt an Sermoin._x000D_SCOTLAND._x000D_Mull (44)	Mull (44)	NM 575 411	SCOTLAND		Outer or inner granophyre				N	157500	741100	http://www.bgs.ac.uk/data/britrocks/britrocks.cfc?method=viewSamples&sampleId=371820	http://www.largeimages.bgs.ac.uk/iip/britrocks.html?id=120000/122701	http://www.largeimages.bgs.ac.uk/iip/britrocks.html?id=120000/122700
371821				X						0	S2094	2094	2094	2094	Geikie,A.	*	'Original entry: Granophyre'	1	W side of Ben Fada._x000D_SCOTLAND._x000D_Mull (44)	Mull (44)	NM 5244 3563	SCOTLAND		Beinn a' ghraig granophyre; memoir, p. 348				N	152440	735630	http://www.bgs.ac.uk/data/britrocks/britrocks.cfc?method=viewSamples&sampleId=371821	http://www.largeimages.bgs.ac.uk/iip/britrocks.html?id=120000/122703	http://www.largeimages.bgs.ac.uk/iip/britrocks.html?id=120000/122702
371822				X						0	S2095	2095	2095	2095	Geikie,A.	*	'Original entry: Granophyre'	1	W end of Ben Fada._x000D_SCOTLAND._x000D_Mull (44)	Mull (44)	NM 5244 3563	SCOTLAND		Beinn a' ghraig granophyre; memoir, p. 348				N	152440	735630	http://www.bgs.ac.uk/data/britrocks/britrocks.cfc?method=viewSamples&sampleId=371822	http://www.largeimages.bgs.ac.uk/iip/britrocks.html?id=120000/122705	http://www.largeimages.bgs.ac.uk/iip/britrocks.html?id=120000/122704
371823				X						0	S2096	2096	2096	2096	Geikie,A.	*	'Original entry: Ophitic Dolerite'	1	Side of Ben na Lus, Forsa River._x000D_SCOTLAND._x000D_Mull (44)	Mull (44)	NM 598 410	SCOTLAND		Gabbro mass				N	159800	741000	http://www.bgs.ac.uk/data/britrocks/britrocks.cfc?method=viewSamples&sampleId=371823	http://www.largeimages.bgs.ac.uk/iip/britrocks.html?id=120000/122707	http://www.largeimages.bgs.ac.uk/iip/britrocks.html?id=120000/122706
371824				X						0	S2097	2097	2097	2097	Geikie,A.	*	'Original entry: Ophitic Dolerite'	1	N point of Ben More._x000D_SCOTLAND._x000D_Mull (44)	Mull (44)	NM 516 348	SCOTLAND		Gabbro mass				N	151600	734800	http://www.bgs.ac.uk/data/britrocks/britrocks.cfc?method=viewSamples&sampleId=371824	http://www.largeimages.bgs.ac.uk/iip/britrocks.html?id=120000/122709	http://www.largeimages.bgs.ac.uk/iip/britrocks.html?id=120000/122708
371825				X						0	S2098	2098	2098	2098	Geikie,A.	*	'Original entry: Ophitic Dolerite'	1	Head of corrie between Ben More and Ben Fada._x000D_SCOTLAND._x000D_Mull (44)	Mull (44)	NM 538 344	SCOTLAND		Gabbro mass				N	153800	734400	http://www.bgs.ac.uk/data/britrocks/britrocks.cfc?method=viewSamples&sampleId=371825	http://www.largeimages.bgs.ac.uk/iip/britrocks.html?id=120000/122711	http://www.largeimages.bgs.ac.uk/iip/britrocks.html?id=120000/122710
371826				X						0	S2099	2099	2099	2099	Geikie,A.	*	'Original entry: Gabbro'	1	Cliff above corrie, E side of Ben More._x000D_SCOTLAND._x000D_Mull (44)	Mull (44)	NM 528 327	SCOTLAND		Gabbro mass				N	152800	732700	http://www.bgs.ac.uk/data/britrocks/britrocks.cfc?method=viewSamples&sampleId=371826	http://www.largeimages.bgs.ac.uk/iip/britrocks.html?id=120000/122713	http://www.largeimages.bgs.ac.uk/iip/britrocks.html?id=120000/122712
371827				X						0	S2100	2100	2100	2100	Geikie,A.	*	'Original entry: Olivine-Dolerite Or Porphyrite?'	1	S side of Allt Dishaig, Ben More, at 1500 ft OD._x000D_SCOTLAND._x000D_Mull (44)	Mull (44)	NM 512 342	SCOTLAND		Probably lava; much altered, secondary augite and hornblende				N	151200	734200	http://www.bgs.ac.uk/data/britrocks/britrocks.cfc?method=viewSamples&sampleId=371827	http://www.largeimages.bgs.ac.uk/iip/britrocks.html?id=120000/122715	http://www.largeimages.bgs.ac.uk/iip/britrocks.html?id=120000/122714
371828				X						0	S2101	2101	2101	2101	Geikie,A.	*	'Original entry: Micro-Ophitic Olivine-Dolerite'	1	Ben More (from pale group of lavas)._x000D_SCOTLAND._x000D_Mull (44)	Mull (44)	NM 513 342	SCOTLAND		Lavas; olivine decomposed				N	151300	734200	http://www.bgs.ac.uk/data/britrocks/britrocks.cfc?method=viewSamples&sampleId=371828	http://www.largeimages.bgs.ac.uk/iip/britrocks.html?id=120000/122717	http://www.largeimages.bgs.ac.uk/iip/britrocks.html?id=120000/122716
371829				X						0	S2102	2102	2102	2102	Geikie,A.	*	'Original entry: Basalt'	1	Ben More (from pale group of lavas)._x000D_SCOTLAND._x000D_Mull (44)	Mull (44)	NM 514 341	SCOTLAND		Relations unknown (olivine decomposed)				N	151400	734100	http://www.bgs.ac.uk/data/britrocks/britrocks.cfc?method=viewSamples&sampleId=371829	http://www.largeimages.bgs.ac.uk/iip/britrocks.html?id=120000/122719	http://www.largeimages.bgs.ac.uk/iip/britrocks.html?id=120000/122718
371830				X						0	S2103	2103	2103	2103	Geikie,A.	*	'Original entry: Mugearitic Olivine-Dolerite'	1	Ben More (from pale group of lavas)._x000D_SCOTLAND._x000D_Mull (44)	Mull (44)	NM 516 341	SCOTLAND		Lava; olivines large and decomposed				N	151600	734100	http://www.bgs.ac.uk/data/britrocks/britrocks.cfc?method=viewSamples&sampleId=371830	http://www.largeimages.bgs.ac.uk/iip/britrocks.html?id=120000/122721	http://www.largeimages.bgs.ac.uk/iip/britrocks.html?id=120000/122720
371831				X						0	S2104	2104	2104	2104	Geikie,A.	*	'Original entry: Pitchstone?'	1	Ben More (from pale group of lavas)._x000D_SCOTLAND._x000D_Mull (44)	Mull (44)	NM 517 340	SCOTLAND		Relations unknown				N	151700	734000	http://www.bgs.ac.uk/data/britrocks/britrocks.cfc?method=viewSamples&sampleId=371831	http://www.largeimages.bgs.ac.uk/iip/britrocks.html?id=120000/122723	http://www.largeimages.bgs.ac.uk/iip/britrocks.html?id=120000/122722
371832				X						0	S2105	2105	2105	2105	Geikie,A.	*	'Original entry: Trachyte'	1	Ben More (from pale group of lavas)._x000D_SCOTLAND._x000D_Mull (44)	Mull (44)	NM 519 339	SCOTLAND		Probably mugearite sill				N	151900	733900	http://www.bgs.ac.uk/data/britrocks/britrocks.cfc?method=viewSamples&sampleId=371832	http://www.largeimages.bgs.ac.uk/iip/britrocks.html?id=120000/122725	http://www.largeimages.bgs.ac.uk/iip/britrocks.html?id=120000/122724
371833				X						0	S2106	2106	2106	2106	Geikie,A.	*	'Original entry: Trachyte'	1	Ben More (from pale group of lavas)._x000D_SCOTLAND._x000D_Mull (44)	Mull (44)	NM 521 338	SCOTLAND		Probably mugearite sill				N	152100	733800	http://www.bgs.ac.uk/data/britrocks/britrocks.cfc?method=viewSamples&sampleId=371833	http://www.largeimages.bgs.ac.uk/iip/britrocks.html?id=120000/122727	http://www.largeimages.bgs.ac.uk/iip/britrocks.html?id=120000/122726
371026				X						0	S2107	2107	2107	2107	Geikie,A.	*	'Original entry: Olivine-Basalt'	1	Ben More (from pale group of lavas)._x000D_SCOTLAND._x000D_Mull (44)	Mull (44)	NM 522 336	SCOTLAND		Lava				N	152200	733600	http://www.bgs.ac.uk/data/britrocks/britrocks.cfc?method=viewSamples&sampleId=371026	http://www.largeimages.bgs.ac.uk/iip/britrocks.html?id=120000/122729	http://www.largeimages.bgs.ac.uk/iip/britrocks.html?id=120000/122728
371834				X						0	S2108	2108	2108	2108	Geikie,A.	*	'Original entry: Indeterminable'	1	Ben More (from pale group of lavas)._x000D_SCOTLAND._x000D_Mull (44)	Mull (44)	NM 522 335	SCOTLAND		Lava				N	152200	733500	http://www.bgs.ac.uk/data/britrocks/britrocks.cfc?method=viewSamples&sampleId=371834	http://www.largeimages.bgs.ac.uk/iip/britrocks.html?id=120000/122731	http://www.largeimages.bgs.ac.uk/iip/britrocks.html?id=120000/122730
371835				X						0	S2109	2109	2109	2109	Geikie,A.	*	'Original entry: Microporphyritic Olivine-Basalt'	1	Ben More (from pale group of lavas)._x000D_SCOTLAND._x000D_Mull (44)	Mull (44)	NM 523 334	SCOTLAND		Lava; memoir, p. 141				N	152300	733400	http://www.bgs.ac.uk/data/britrocks/britrocks.cfc?method=viewSamples&sampleId=371835	http://www.largeimages.bgs.ac.uk/iip/britrocks.html?id=120000/122733	http://www.largeimages.bgs.ac.uk/iip/britrocks.html?id=120000/122732
371386				X						0	S2110	2110	2110	2110	Geikie,A.	*	'Original entry: Olivine-Dolerite'	1	Ben More (from pale group of lavas)._x000D_SCOTLAND._x000D_Mull (44)	Mull (44)	NM 523 333	SCOTLAND		Lava				N	152300	733300	http://www.bgs.ac.uk/data/britrocks/britrocks.cfc?method=viewSamples&sampleId=371386	http://www.largeimages.bgs.ac.uk/iip/britrocks.html?id=120000/122735	http://www.largeimages.bgs.ac.uk/iip/britrocks.html?id=120000/122734
371836				X						0	S2111	2111	2111	2111	Geikie,A.	*	'Original entry: Micro-Ophitic Dolerite'	1	Ben More (from pale group of lavas)._x000D_SCOTLAND._x000D_Mull (44)	Mull (44)	NM 524 332	SCOTLAND		Lava				N	152400	733200	http://www.bgs.ac.uk/data/britrocks/britrocks.cfc?method=viewSamples&sampleId=371836	http://www.largeimages.bgs.ac.uk/iip/britrocks.html?id=120000/122737	http://www.largeimages.bgs.ac.uk/iip/britrocks.html?id=120000/122736
371027				X						0	S2112	2112	2112	2112	Geikie,A.	*	'Original entry: Ophitic Dolerite'	1	From top of Ben More._x000D_SCOTLAND._x000D_Mull (44)	Mull (44)	NM 525 331	SCOTLAND		Lava; memoir, p. 141				N	152500	733100	http://www.bgs.ac.uk/data/britrocks/britrocks.cfc?method=viewSamples&sampleId=371027	http://www.largeimages.bgs.ac.uk/iip/britrocks.html?id=120000/122739	http://www.largeimages.bgs.ac.uk/iip/britrocks.html?id=120000/122738
371837				X						0	S2115	2115	2115	2115	Geikie,A.	*	'Original entry: ?Porphyrite'	1	Head of S branch of Scarrisdale Water._x000D_SCOTLAND._x000D_Mull (44)	Mull (44)	NM 542 355	SCOTLAND		Relations unknown				N	154200	735500	http://www.bgs.ac.uk/data/britrocks/britrocks.cfc?method=viewSamples&sampleId=371837	http://www.largeimages.bgs.ac.uk/iip/britrocks.html?id=120000/122745	http://www.largeimages.bgs.ac.uk/iip/britrocks.html?id=120000/122744
371838				X						0	S2116	2116	2116	2116	Geikie,A.	*	'Original entry: Augite Porphyry'	1	Top of Beinn Talaidh._x000D_SCOTLAND._x000D_Mull (44)	Mull (44)	NM 627 348	SCOTLAND		Inclined sheet				N	162700	734800	http://www.bgs.ac.uk/data/britrocks/britrocks.cfc?method=viewSamples&sampleId=371838	http://www.largeimages.bgs.ac.uk/iip/britrocks.html?id=120000/122747	http://www.largeimages.bgs.ac.uk/iip/britrocks.html?id=120000/122746
371839				X						0	S2117	2117	2117	2117	Geikie,A.	*	'Original entry: Augite Diorite'	1	0.25 mile S of Gaodhail (dyke in bedded lavas)._x000D_SCOTLAND._x000D_Mull (44)	Mull (44)	NM 610 382	SCOTLAND		Talaidh inclined sheet, cutting needle rock mass; memoir, p. 218				N	161000	738200	http://www.bgs.ac.uk/data/britrocks/britrocks.cfc?method=viewSamples&sampleId=371839	http://www.largeimages.bgs.ac.uk/iip/britrocks.html?id=120000/122749	http://www.largeimages.bgs.ac.uk/iip/britrocks.html?id=120000/122748
371840				X						0	S2118	2118	2118	2118	Geikie,A.	*	'Original entry: Baked Olivine-Basalt'	1	Top of Beinn a' Ghraig._x000D_SCOTLAND._x000D_Mull (44)	Mull (44)	NM 5415 3742	SCOTLAND		Lava cap; development of biotite and secondary hornblende				N	154150	737420	http://www.bgs.ac.uk/data/britrocks/britrocks.cfc?method=viewSamples&sampleId=371840	http://www.largeimages.bgs.ac.uk/iip/britrocks.html?id=120000/122751	http://www.largeimages.bgs.ac.uk/iip/britrocks.html?id=120000/122750
371028				X						0	S2119	2119	2119	2119	Geikie,A.	*	'Original entry: Felsite Pitchstone'	1	East side of Loch Ba (intrusive)._x000D_SCOTLAND._x000D_Mull (44)	Mull (44)	NM 5672 3860	SCOTLAND		Loch ba dyke; memoir, p. 346				N	156720	738600	http://www.bgs.ac.uk/data/britrocks/britrocks.cfc?method=viewSamples&sampleId=371028	http://www.largeimages.bgs.ac.uk/iip/britrocks.html?id=120000/122753	http://www.largeimages.bgs.ac.uk/iip/britrocks.html?id=120000/122752
371841				X						0	S2120	2120	2120	2120	Geikie,A.	*	'Original entry: Ophiti Dolerite'	1	Top of Beinn Talaidh._x000D_SCOTLAND._x000D_Mull (44)	Mull (44)	NM 625 347	SCOTLAND		Relations unknown				N	162500	734700	http://www.bgs.ac.uk/data/britrocks/britrocks.cfc?method=viewSamples&sampleId=371841	http://www.largeimages.bgs.ac.uk/iip/britrocks.html?id=120000/122755	http://www.largeimages.bgs.ac.uk/iip/britrocks.html?id=120000/122754
371842				X						0	S2121	2121	2121	2121	Geikie,A.	*	'Original entry: Felsite Pitchstone'	1	Top of Scarrisdale Water._x000D_SCOTLAND._x000D_Mull (44)	Mull (44)	NM 5466 3637	SCOTLAND		Loch ba dyke; memoir, p. 346				N	154660	736370	http://www.bgs.ac.uk/data/britrocks/britrocks.cfc?method=viewSamples&sampleId=371842	http://www.largeimages.bgs.ac.uk/iip/britrocks.html?id=120000/122757	http://www.largeimages.bgs.ac.uk/iip/britrocks.html?id=120000/122756
371843				X						0	S2122	2122	2122	2122	Geikie,A.	*	'Original entry: ?Porphyrite'	1	Above Knock (associated with granite)._x000D_SCOTLAND._x000D_Mull (44)	Mull (44)	NM 5446 3878	SCOTLAND		Outer g				N	154460	738780	http://www.bgs.ac.uk/data/britrocks/britrocks.cfc?method=viewSamples&sampleId=371843	http://www.largeimages.bgs.ac.uk/iip/britrocks.html?id=120000/122759	http://www.largeimages.bgs.ac.uk/iip/britrocks.html?id=120000/122758
361016				X						0	S2123	2123	2123	2123	Geikie,A.	*	'Original entry: Dolerite'	1	'S Airde Beinn, 2 miles SW of Tobermory._x000D_SCOTLAND._x000D_Coll (51)	Coll (51)	NM 47 54	SCOTLAND		From margin of neck				N	147000	754000	http://www.bgs.ac.uk/data/britrocks/britrocks.cfc?method=viewSamples&sampleId=361016	http://www.largeimages.bgs.ac.uk/iip/britrocks.html?id=120000/122761	http://www.largeimages.bgs.ac.uk/iip/britrocks.html?id=120000/122760
371844				X						0	S2124; S2124/a;	2124	2124	2124	Geikie,A.	*	'Original entry: Granophyre'	1	Head of Allt na Searmoin._x000D_SCOTLAND._x000D_Mull (44)	Mull (44)	NM 5778 4057	SCOTLAND		Junction with granite and basalt				N	157780	740570	http://www.bgs.ac.uk/data/britrocks/britrocks.cfc?method=viewSamples&sampleId=371844	http://www.largeimages.bgs.ac.uk/iip/britrocks.html?id=120000/122763	http://www.largeimages.bgs.ac.uk/iip/britrocks.html?id=120000/122762	http://www.largeimages.bgs.ac.uk/iip/britrocks.html?id=120000/122765	http://www.largeimages.bgs.ac.uk/iip/britrocks.html?id=120000/122764
371029				X						0	S2125	2125	2125	2125	Geikie,A.	*	'Original entry: Dolerite'	1	Beinn Creagach Mor._x000D_SCOTLAND._x000D_Mull (44)	Mull (44)	NM 630 390	SCOTLAND		Big inclined sheet				N	163000	739000	http://www.bgs.ac.uk/data/britrocks/britrocks.cfc?method=viewSamples&sampleId=371029	http://www.largeimages.bgs.ac.uk/iip/britrocks.html?id=120000/122767	http://www.largeimages.bgs.ac.uk/iip/britrocks.html?id=120000/122766
371845				X						0	S2126	2126	2126	2126	Geikie,A.	*	'Original entry: ?Dolerite'	1	Wooden bridge, about centre of Glen Forsa._x000D_SCOTLAND._x000D_Mull (44)	Mull (44)	NM 6151 3848	SCOTLAND		Probably inclined sheet; from edge of granite area				N	161510	738480	http://www.bgs.ac.uk/data/britrocks/britrocks.cfc?method=viewSamples&sampleId=371845	http://www.largeimages.bgs.ac.uk/iip/britrocks.html?id=120000/122769	http://www.largeimages.bgs.ac.uk/iip/britrocks.html?id=120000/122768
371846				X						0	S2127	2127	2127	2127	Geikie,A.	*	'Original entry: Olivine-Dolerite'	1	Top of Glen Clachaig (edge of granite area)._x000D_SCOTLAND._x000D_Mull (44)	Mull (44)	NM 548 340	SCOTLAND		Main clachaig gabbro				N	154800	734000	http://www.bgs.ac.uk/data/britrocks/britrocks.cfc?method=viewSamples&sampleId=371846	http://www.largeimages.bgs.ac.uk/iip/britrocks.html?id=120000/122771	http://www.largeimages.bgs.ac.uk/iip/britrocks.html?id=120000/122770
371847				X						0	S2128	2128	2128	2128	Geikie,A.	*	'Original entry: Olivine-Dolerite'	1	S shore of Loch na Keal._x000D_SCOTLAND._x000D_Mull (44)	Mull (44)	NM 49 36	SCOTLAND		Lava; augite purple-edged				N	149000	736000	http://www.bgs.ac.uk/data/britrocks/britrocks.cfc?method=viewSamples&sampleId=371847	http://www.largeimages.bgs.ac.uk/iip/britrocks.html?id=120000/122773	http://www.largeimages.bgs.ac.uk/iip/britrocks.html?id=120000/122772
362376				X						0	S2129	2129	2129	2129	Geikie,A.	*	'Original entry: Ophitic Olivine-Dolerite'	1	2 miles W of Tobermory._x000D_SCOTLAND._x000D_Tobermory (52)	Tobermory (52)	NM 48 55	SCOTLAND						N	148000	755000	http://www.bgs.ac.uk/data/britrocks/britrocks.cfc?method=viewSamples&sampleId=362376	http://www.largeimages.bgs.ac.uk/iip/britrocks.html?id=120000/122775	http://www.largeimages.bgs.ac.uk/iip/britrocks.html?id=120000/122774
371848				X						0	S2130	2130	2130	2130	Geikie,A.	*	'Original entry: Ophitic Dolerite'	1	Beinn Creagach Mor._x000D_SCOTLAND._x000D_Mull (44)	Mull (44)	NM 6310 3920	SCOTLAND		Big inclined sheet				N	163100	739200	http://www.bgs.ac.uk/data/britrocks/britrocks.cfc?method=viewSamples&sampleId=371848	http://www.largeimages.bgs.ac.uk/iip/britrocks.html?id=120000/122777	http://www.largeimages.bgs.ac.uk/iip/britrocks.html?id=120000/122776
371849				X						0	S2131	2131	2131	2131	Geikie,A.	*	'Original entry: Granophyre'	1	N side near foot of Glen Clachaig (fallen block)._x000D_SCOTLAND._x000D_Mull (44)	Mull (44)	NM 5708 3586	SCOTLAND		Glen cannel granite				N	157080	735860	http://www.bgs.ac.uk/data/britrocks/britrocks.cfc?method=viewSamples&sampleId=371849	http://www.largeimages.bgs.ac.uk/iip/britrocks.html?id=120000/122779	http://www.largeimages.bgs.ac.uk/iip/britrocks.html?id=120000/122778
361402				X						0	S2132	2132	2132	2132	Geikie,A.	*	'Original entry: Ophitic Dolerite'	1	'S Airde Beinn, 2 miles SW of Tobermory._x000D_SCOTLAND._x000D_Coll (51)	Coll (51)	NM 47 54	SCOTLAND						N	147000	754000	http://www.bgs.ac.uk/data/britrocks/britrocks.cfc?method=viewSamples&sampleId=361402	http://www.largeimages.bgs.ac.uk/iip/britrocks.html?id=120000/122781	http://www.largeimages.bgs.ac.uk/iip/britrocks.html?id=120000/122780
371850				X						0	S2133	2133	2133	2133	Geikie,A.	*	'Original entry: Granophyre'	1	SW of Salen, E of Torranlochain._x000D_SCOTLAND._x000D_Mull (44)	Mull (44)	NM 565 410	SCOTLAND		Probably outer granite				N	156500	741000	http://www.bgs.ac.uk/data/britrocks/britrocks.cfc?method=viewSamples&sampleId=371850	http://www.largeimages.bgs.ac.uk/iip/britrocks.html?id=120000/122783	http://www.largeimages.bgs.ac.uk/iip/britrocks.html?id=120000/122782
371851				X						0	S2134	2134	2134	2134	Geikie,A.	*	'Original entry: Spherulitic Felsite'	1	N end of Craig Craggan._x000D_SCOTLAND._x000D_Mull (44)	Mull (44)	NM	SCOTLAND						N	100000	700000	http://www.bgs.ac.uk/data/britrocks/britrocks.cfc?method=viewSamples&sampleId=371851	http://www.largeimages.bgs.ac.uk/iip/britrocks.html?id=120000/122785	http://www.largeimages.bgs.ac.uk/iip/britrocks.html?id=120000/122784
371852				X						0	S2135	2135	2135	2135	Geikie,A.	*	'Original entry: Gabbro'	1	E side of Mainnir nam Fiadh._x000D_SCOTLAND._x000D_Mull (44)	Mull (44)	NM 680 351	SCOTLAND		Inclined sheet				N	168000	735100	http://www.bgs.ac.uk/data/britrocks/britrocks.cfc?method=viewSamples&sampleId=371852	http://www.largeimages.bgs.ac.uk/iip/britrocks.html?id=120000/122787	http://www.largeimages.bgs.ac.uk/iip/britrocks.html?id=120000/122786
371853				X						0	S2136	2136	2136	2136	Geikie,A.	*	'Original entry: Gabbro'	1	Beinn Creagach Mor._x000D_SCOTLAND._x000D_Mull (44)	Mull (44)	NM 630 390	SCOTLAND		Big inclined sheet				N	163000	739000	http://www.bgs.ac.uk/data/britrocks/britrocks.cfc?method=viewSamples&sampleId=371853	http://www.largeimages.bgs.ac.uk/iip/britrocks.html?id=120000/122789	http://www.largeimages.bgs.ac.uk/iip/britrocks.html?id=120000/122788
361403				X						0	S2137	2137	2137	2137	Geikie,A.	*	'Original entry: Ophitic Dolerite'	1	'S Airde Beinn, 2 miles SW of Tobermory._x000D_SCOTLAND._x000D_Coll (51)	Coll (51)	NM 47 54	SCOTLAND						N	147000	754000	http://www.bgs.ac.uk/data/britrocks/britrocks.cfc?method=viewSamples&sampleId=361403	http://www.largeimages.bgs.ac.uk/iip/britrocks.html?id=120000/122791	http://www.largeimages.bgs.ac.uk/iip/britrocks.html?id=120000/122790
371854				X						0	S2138	2138	2138	2138	Geikie,A.	*	'Original entry: Microgranite'	1	Head of E branch of Allt na Searmoin._x000D_SCOTLAND._x000D_Mull (44)	Mull (44)	NM 5797 4078	SCOTLAND		Outer or inner granite				N	157970	740780	http://www.bgs.ac.uk/data/britrocks/britrocks.cfc?method=viewSamples&sampleId=371854	http://www.largeimages.bgs.ac.uk/iip/britrocks.html?id=120000/122793	http://www.largeimages.bgs.ac.uk/iip/britrocks.html?id=120000/122792
371855				X						0	S2139	2139	2139	2139	Geikie,A.	*	'Original entry: Felsite'	1	Near Salen Hotel._x000D_SCOTLAND._x000D_Mull (44)	Mull (44)	NM 573 431	SCOTLAND		Small granite mass				N	157300	743100	http://www.bgs.ac.uk/data/britrocks/britrocks.cfc?method=viewSamples&sampleId=371855	http://www.largeimages.bgs.ac.uk/iip/britrocks.html?id=120000/122795	http://www.largeimages.bgs.ac.uk/iip/britrocks.html?id=120000/122794
371856				X						0	S2140	2140	2140	2140	Geikie,A.	*	'Original entry: Felsite'	1	Head of E fork of Allt na Searmoin._x000D_SCOTLAND._x000D_Mull (44)	Mull (44)	NM 5797 4078	SCOTLAND		Outer or inner granite				N	157970	740780	http://www.bgs.ac.uk/data/britrocks/britrocks.cfc?method=viewSamples&sampleId=371856	http://www.largeimages.bgs.ac.uk/iip/britrocks.html?id=120000/122797	http://www.largeimages.bgs.ac.uk/iip/britrocks.html?id=120000/122796
371857				X						0	S2141	2141	2141	2141	Geikie,A.	*	'Original entry: Perlitic Pitchstone'	1	Head of Gaodhail Burn._x000D_SCOTLAND._x000D_Mull (44)	Mull (44)	NM 6003 3748	SCOTLAND		Relations unknown				N	160030	737480	http://www.bgs.ac.uk/data/britrocks/britrocks.cfc?method=viewSamples&sampleId=371857	http://www.largeimages.bgs.ac.uk/iip/britrocks.html?id=120000/122799	http://www.largeimages.bgs.ac.uk/iip/britrocks.html?id=120000/122798
371858				X						0	S2142	2142	2142	2142	Geikie,A.	*	'Original entry: Brecciated Tuff'	1	N spur of Beinn Talaidh._x000D_SCOTLAND._x000D_Mull (44)	Mull (44)	NM 621 360	SCOTLAND		Breccia				N	162100	736000	http://www.bgs.ac.uk/data/britrocks/britrocks.cfc?method=viewSamples&sampleId=371858	http://www.largeimages.bgs.ac.uk/iip/britrocks.html?id=120000/122801	http://www.largeimages.bgs.ac.uk/iip/britrocks.html?id=120000/122800
361404				X						0	S2143	2143	2143	2143	Geikie,A.	*	'Original entry: Basalt'	1	'S Airde Beinn, 2 miles SW of Tobermory._x000D_SCOTLAND._x000D_Coll (51)	Coll (51)	NM 47 54	SCOTLAND						N	147000	754000	http://www.bgs.ac.uk/data/britrocks/britrocks.cfc?method=viewSamples&sampleId=361404	http://www.largeimages.bgs.ac.uk/iip/britrocks.html?id=120000/122803	http://www.largeimages.bgs.ac.uk/iip/britrocks.html?id=120000/122802
371859				X						0	S2144	2144	2144	2144	Geikie,A.	*	'Original entry: Granophyre'	1	S branch of Scarrisdale Water._x000D_SCOTLAND._x000D_Mull (44)	Mull (44)	NM 540 357	SCOTLAND		Granite (beinn a' ghraig)				N	154000	735700	http://www.bgs.ac.uk/data/britrocks/britrocks.cfc?method=viewSamples&sampleId=371859	http://www.largeimages.bgs.ac.uk/iip/britrocks.html?id=120000/122805	http://www.largeimages.bgs.ac.uk/iip/britrocks.html?id=120000/122804
371860				X						0	S2145	2145	2145	2145	Geikie,A.	*	'Original entry: Felsitic Pitchstone'	1	E side of Beinn Creagach Mor (basalt group)._x000D_SCOTLAND._x000D_Mull (44)	Mull (44)	NM 635 388	SCOTLAND		Probably belonging to breccia group				N	163500	738800	http://www.bgs.ac.uk/data/britrocks/britrocks.cfc?method=viewSamples&sampleId=371860	http://www.largeimages.bgs.ac.uk/iip/britrocks.html?id=120000/122807	http://www.largeimages.bgs.ac.uk/iip/britrocks.html?id=120000/122806
371861				X						0	S2146	2146	2146	2146	Geikie,A.	*	'Original entry: Granophyre'	1	Loch na Dairidh._x000D_SCOTLAND._x000D_Mull (44)	Mull (44)	NM 5738 4046	SCOTLAND		Inner granite				N	157380	740460	http://www.bgs.ac.uk/data/britrocks/britrocks.cfc?method=viewSamples&sampleId=371861	http://www.largeimages.bgs.ac.uk/iip/britrocks.html?id=120000/122809	http://www.largeimages.bgs.ac.uk/iip/britrocks.html?id=120000/122808
352250										0	S2147	2147	2147	2147	Geikie,A.	*	'Original entry: Hornblende Granitite'	1	Camas Malag, Kilbride._x000D_SCOTLAND._x000D_Glenelg (71)	Glenelg (71)	NG 584 190	SCOTLAND						N	158400	819000	http://www.bgs.ac.uk/data/britrocks/britrocks.cfc?method=viewSamples&sampleId=352250	http://www.largeimages.bgs.ac.uk/iip/britrocks.html?id=120000/122811	http://www.largeimages.bgs.ac.uk/iip/britrocks.html?id=120000/122810
374994				X						0	S2148	2148	2148	2148	Geikie,A.	*	'Original entry: Altered Olivine Basalt'	1	S of High Corrie._x000D_SCOTLAND._x000D_Arran (Millport) (21)	Arran (Millport) (21)	NS 020 420	SCOTLAND		Altered olivine basalt				N	202000	642000	http://www.bgs.ac.uk/data/britrocks/britrocks.cfc?method=viewSamples&sampleId=374994	http://www.largeimages.bgs.ac.uk/iip/britrocks.html?id=120000/122813	http://www.largeimages.bgs.ac.uk/iip/britrocks.html?id=120000/122812
384101						X				0	S2162	2162	2162	2162	Geikie,A.	*	'Original entry: Phonolitic Trachyte'	1	Bass Rock._x000D_SCOTLAND._x000D_North Berwick (41)	North Berwick (41)	NT 60 87	SCOTLAND						N	360000	687000	http://www.bgs.ac.uk/data/britrocks/britrocks.cfc?method=viewSamples&sampleId=384101	http://www.largeimages.bgs.ac.uk/iip/britrocks.html?id=120000/123353	http://www.largeimages.bgs.ac.uk/iip/britrocks.html?id=120000/123352
374995				X						0	S2193	2193	2193	2193	Geikie,A.	*	'Original entry: Granophyric Granite'	1	Burn W of Corrie._x000D_SCOTLAND._x000D_Arran (Millport) (21)	Arran (Millport) (21)	NS 010 430	SCOTLAND		Granophyric granite, granite contact with schist				N	201000	643000	http://www.bgs.ac.uk/data/britrocks/britrocks.cfc?method=viewSamples&sampleId=374995	http://www.largeimages.bgs.ac.uk/iip/britrocks.html?id=120000/123417	http://www.largeimages.bgs.ac.uk/iip/britrocks.html?id=120000/123416
374996				X						0	S2194	2194	2194	2194	Geikie,A.	*	'Original entry: Epidote Grit'	1	Burn W of Corrie._x000D_SCOTLAND._x000D_Arran (Millport) (21)	Arran (Millport) (21)	NS 010 430	SCOTLAND		Epidote grit, 7 yards from granite				N	201000	643000	http://www.bgs.ac.uk/data/britrocks/britrocks.cfc?method=viewSamples&sampleId=374996	http://www.largeimages.bgs.ac.uk/iip/britrocks.html?id=120000/123419	http://www.largeimages.bgs.ac.uk/iip/britrocks.html?id=120000/123418
374997				X						0	S2195	2195	2195	2195	Geikie,A.	*	'Original entry: Epidote Grit'	1	Burn W of Corrie._x000D_SCOTLAND._x000D_Arran (Millport) (21)	Arran (Millport) (21)	NS 010 430	SCOTLAND		Epidote grit, 10 yards from granite				N	201000	643000	http://www.bgs.ac.uk/data/britrocks/britrocks.cfc?method=viewSamples&sampleId=374997	http://www.largeimages.bgs.ac.uk/iip/britrocks.html?id=120000/123421	http://www.largeimages.bgs.ac.uk/iip/britrocks.html?id=120000/123420
375580				X						0	S2196	2196	2196	2196	Geikie,A.	*	'Original entry: Greywacke (Grit)'	1	Burn W of Corrie._x000D_SCOTLAND._x000D_Arran (Millport) (21)	Arran (Millport) (21)	NS 010 430	SCOTLAND		Greywacke (grit), 27 yards from granite				N	201000	643000	http://www.bgs.ac.uk/data/britrocks/britrocks.cfc?method=viewSamples&sampleId=375580	http://www.largeimages.bgs.ac.uk/iip/britrocks.html?id=120000/123423	http://www.largeimages.bgs.ac.uk/iip/britrocks.html?id=120000/123422
322858										0	S2197	2197	2197	2197	Geikie,A.	*	'Original entry: Altered Shale'	1	Aithness, Aithsting._x000D_SCOTLAND._x000D_Central Shetland (128)	Central Shetland (128)	HU 33 59	SCOTLAND		Altered shale, old red age				N	433000	1159000	http://www.bgs.ac.uk/data/britrocks/britrocks.cfc?method=viewSamples&sampleId=322858	http://www.largeimages.bgs.ac.uk/iip/britrocks.html?id=120000/123425	http://www.largeimages.bgs.ac.uk/iip/britrocks.html?id=120000/123424
323496										0	S2198	2198	2198	2198	Geikie,A.	*	'Original entry: Mylonite'	1	West of Seli Voe, Sandsting._x000D_SCOTLAND._x000D_Central Shetland (128)	Central Shetland (128)	HU 332 455	SCOTLAND		Mylonite, quartzose, altered shale, roadside in granite junction				N	433200	1145500	http://www.bgs.ac.uk/data/britrocks/britrocks.cfc?method=viewSamples&sampleId=323496	http://www.largeimages.bgs.ac.uk/iip/britrocks.html?id=120000/123427	http://www.largeimages.bgs.ac.uk/iip/britrocks.html?id=120000/123426
323560										0	S2199	2199	2199	2199	Geikie,A.	*	'Original entry: Micaceous Sandstone'	1	Aith Voe, Aithsting._x000D_SCOTLAND._x000D_Central Shetland (128)	Central Shetland (128)	HU 341 577	SCOTLAND		Micaceous sandstone, near fault				N	434100	1157700	http://www.bgs.ac.uk/data/britrocks/britrocks.cfc?method=viewSamples&sampleId=323560	http://www.largeimages.bgs.ac.uk/iip/britrocks.html?id=120000/123429	http://www.largeimages.bgs.ac.uk/iip/britrocks.html?id=120000/123428
321130										0	S2200	2200	2200	2200	Geikie,A.	*	'Original entry: Granitite'	1	N side of Skeld Hill._x000D_SCOTLAND._x000D_West Shetland and South Shetland ? (126)	West Shetland and South Shetland ? (126)	HU 30 44	SCOTLAND		Granitite				N	430000	1144000	http://www.bgs.ac.uk/data/britrocks/britrocks.cfc?method=viewSamples&sampleId=321130	http://www.largeimages.bgs.ac.uk/iip/britrocks.html?id=120000/123431	http://www.largeimages.bgs.ac.uk/iip/britrocks.html?id=120000/123430
278029										0	S2213	2213	2213	2213	Geikie,A.	*	'Original entry: Anorthosite'	1	Knob, just above high water mark, 200 yds WSW of gasworks, Portsoy._x000D_SCOTLAND._x000D_Banff (96)	Banff (96)	NJ 5865 6627	SCOTLAND		Fine cataclastic structure; summ.prog.1920, p.60				N	358650	866270	http://www.bgs.ac.uk/data/britrocks/britrocks.cfc?method=viewSamples&sampleId=278029	http://www.largeimages.bgs.ac.uk/iip/britrocks.html?id=120000/123445	http://www.largeimages.bgs.ac.uk/iip/britrocks.html?id=120000/123444
278030										0	S2214	2214	2214	2214	Geikie,A.	*	'Original entry: Hornblende Gabbro'	1	West of Portsoy._x000D_SCOTLAND._x000D_Banff (96)	Banff (96)	NJ 588 664	SCOTLAND		Biotite and uralitic hornblende				N	358800	866400	http://www.bgs.ac.uk/data/britrocks/britrocks.cfc?method=viewSamples&sampleId=278030	http://www.largeimages.bgs.ac.uk/iip/britrocks.html?id=120000/123447	http://www.largeimages.bgs.ac.uk/iip/britrocks.html?id=120000/123446
278031										0	S2219	2219	2219	2219	Geikie,A.	*		0	West of Portsoy._x000D_SCOTLAND._x000D_Banff (96)	Banff (96)	NJ 59 66	SCOTLAND						N	359000	866000	http://www.bgs.ac.uk/data/britrocks/britrocks.cfc?method=viewSamples&sampleId=278031	http://www.largeimages.bgs.ac.uk/iip/britrocks.html?id=120000/123457	http://www.largeimages.bgs.ac.uk/iip/britrocks.html?id=120000/123456
284406										0	S2220	2220	2220	2220	Geikie,A.	*	'Original entry: Serpentine'	1	Leslie._x000D_SCOTLAND._x000D_Inverurie (76)	Inverurie (76)	NJ 596 244	SCOTLAND						N	359600	824400	http://www.bgs.ac.uk/data/britrocks/britrocks.cfc?method=viewSamples&sampleId=284406	http://www.largeimages.bgs.ac.uk/iip/britrocks.html?id=120000/123459	http://www.largeimages.bgs.ac.uk/iip/britrocks.html?id=120000/123458
278032										0	S2221	2221	2221	2221	Geikie,A.	*	'Original entry: Serpentine'	1	Airds Burn, Potsoy._x000D_SCOTLAND._x000D_Banff (96)	Banff (96)	NJ 5908 6562	SCOTLAND						N	359080	865620	http://www.bgs.ac.uk/data/britrocks/britrocks.cfc?method=viewSamples&sampleId=278032
278033										0	S2222	2222	2222	2222	Geikie,A.	*	'Original entry: Hornblende Gabbro'	1	Portsoy Harbour._x000D_SCOTLAND._x000D_Banff (96)	Banff (96)	NJ 5906 6648	SCOTLAND		"diorite"; biotite; cataclastic structure				N	359060	866480	http://www.bgs.ac.uk/data/britrocks/britrocks.cfc?method=viewSamples&sampleId=278033	http://www.largeimages.bgs.ac.uk/iip/britrocks.html?id=120000/123461	http://www.largeimages.bgs.ac.uk/iip/britrocks.html?id=120000/123460
278034										0	S2223	2223	2223	2223	Geikie,A.	*	'Original entry: Amphibolite'	1	W of Marble Quarry, Portsoy._x000D_SCOTLAND._x000D_Banff (96)	Banff (96)	NJ 5855 6639	SCOTLAND		"diorite"; feldspar granulitised				N	358550	866390	http://www.bgs.ac.uk/data/britrocks/britrocks.cfc?method=viewSamples&sampleId=278034	http://www.largeimages.bgs.ac.uk/iip/britrocks.html?id=120000/123463	http://www.largeimages.bgs.ac.uk/iip/britrocks.html?id=120000/123462
278035										0	S2224	2224	2224	2224	Geikie,A.	*	'Original entry: Amphibolite'	1	Marble Quarry, Portsoy._x000D_SCOTLAND._x000D_Banff (96)	Banff (96)	NJ 5858 6638	SCOTLAND		"diorite"; from bomb in chlorite schist				N	358580	866380	http://www.bgs.ac.uk/data/britrocks/britrocks.cfc?method=viewSamples&sampleId=278035	http://www.largeimages.bgs.ac.uk/iip/britrocks.html?id=120000/123465	http://www.largeimages.bgs.ac.uk/iip/britrocks.html?id=120000/123464
278036										0	S2225	2225	2225	2225	Geikie,A.	*	'Original entry: Chloritic Amphibolite'	1	Marble Quarry, Portsoy._x000D_SCOTLAND._x000D_Banff (96)	Banff (96)	NJ 5858 6638	SCOTLAND		"diorite"; passing into chlorite schist				N	358580	866380	http://www.bgs.ac.uk/data/britrocks/britrocks.cfc?method=viewSamples&sampleId=278036	http://www.largeimages.bgs.ac.uk/iip/britrocks.html?id=120000/123467	http://www.largeimages.bgs.ac.uk/iip/britrocks.html?id=120000/123466
278037										0	S2226	2226	2226	2226	Geikie,A.	*	'Original entry: Biotite-Chlorite Schist'	1	Marble Quarry, Portsoy._x000D_SCOTLAND._x000D_Banff (96)	Banff (96)	NJ 5858 6638	SCOTLAND		Altered diorite				N	358580	866380	http://www.bgs.ac.uk/data/britrocks/britrocks.cfc?method=viewSamples&sampleId=278037	http://www.largeimages.bgs.ac.uk/iip/britrocks.html?id=120000/123469	http://www.largeimages.bgs.ac.uk/iip/britrocks.html?id=120000/123468
284407										0	S2227	2227	2227	2227	Geikie,A.	*	'Original entry: Quartz, Feldspar, Pyroxene'	1	Leslie._x000D_SCOTLAND._x000D_Inverurie (76)	Inverurie (76)	NJ 59 24	SCOTLAND						N	359000	824000	http://www.bgs.ac.uk/data/britrocks/britrocks.cfc?method=viewSamples&sampleId=284407	http://www.largeimages.bgs.ac.uk/iip/britrocks.html?id=120000/123471	http://www.largeimages.bgs.ac.uk/iip/britrocks.html?id=120000/123470
284408										0	S2228	2228	2228	2228	Geikie,A.	*	'Original entry: Norite'	1	Inveramsay._x000D_SCOTLAND._x000D_Inverurie (76)	Inverurie (76)	NJ 732 258	SCOTLAND		'diorite': a little biotite				N	373200	825800	http://www.bgs.ac.uk/data/britrocks/britrocks.cfc?method=viewSamples&sampleId=284408	http://www.largeimages.bgs.ac.uk/iip/britrocks.html?id=120000/123473	http://www.largeimages.bgs.ac.uk/iip/britrocks.html?id=120000/123472
284409										0	S2229	2229	2229	2229	Geikie,A.	*	'Original entry: Biotite Gabbro'	1	Insch._x000D_SCOTLAND._x000D_Inverurie (76)	Inverurie (76)	NJ 63 28	SCOTLAND						N	363000	828000	http://www.bgs.ac.uk/data/britrocks/britrocks.cfc?method=viewSamples&sampleId=284409	http://www.largeimages.bgs.ac.uk/iip/britrocks.html?id=120000/123475	http://www.largeimages.bgs.ac.uk/iip/britrocks.html?id=120000/123474
278038										0	S2237	2237	2237	2237	Geikie,A.	*	'Original entry: Biotite Schist (With Actinolite)'	1	Garron Point, W of Portsoy._x000D_SCOTLAND._x000D_Banff (96)	Banff (96)	NJ 554 670	SCOTLAND						N	355400	867000	http://www.bgs.ac.uk/data/britrocks/britrocks.cfc?method=viewSamples&sampleId=278038	http://www.largeimages.bgs.ac.uk/iip/britrocks.html?id=120000/123491	http://www.largeimages.bgs.ac.uk/iip/britrocks.html?id=120000/123490
278039										0	S2241	2241	2241	2241	Geikie,A.	*	'Original entry: Hornblende-Biotite Schist'	1	E side of Portsoy Harbour._x000D_SCOTLAND._x000D_Banff (96)	Banff (96)	NJ 5912 6645	SCOTLAND						N	359120	866450	http://www.bgs.ac.uk/data/britrocks/britrocks.cfc?method=viewSamples&sampleId=278039	http://www.largeimages.bgs.ac.uk/iip/britrocks.html?id=120000/123499	http://www.largeimages.bgs.ac.uk/iip/britrocks.html?id=120000/123498
278040										0	S2243	2243	2243	2243	Geikie,A.	*	'Original entry: Biotite-Chlorite Schist'	1	John Leggs Bay, Portsoy._x000D_SCOTLAND._x000D_Banff (96)	Banff (96)	NJ 582 665	SCOTLAND		"graphite schist"; garnet and carbonaceous matter				N	358200	866500	http://www.bgs.ac.uk/data/britrocks/britrocks.cfc?method=viewSamples&sampleId=278040	http://www.largeimages.bgs.ac.uk/iip/britrocks.html?id=120000/123503	http://www.largeimages.bgs.ac.uk/iip/britrocks.html?id=120000/123502
278041										0	S2246	2246	2246	2246	Geikie,A.	*	'Original entry: Biotite-Muscovite Schist'	1	Findlater Castle, E of Cullen._x000D_SCOTLAND._x000D_Banff (96)	Banff (96)	NJ 542 672	SCOTLAND		"mica-schist" of dr horne				N	354200	867200	http://www.bgs.ac.uk/data/britrocks/britrocks.cfc?method=viewSamples&sampleId=278041	http://www.largeimages.bgs.ac.uk/iip/britrocks.html?id=120000/123509	http://www.largeimages.bgs.ac.uk/iip/britrocks.html?id=120000/123508
278042										0	S2247	2247	2247	2247	Geikie,A.	*	'Original entry: Biotite-Calc Schist'	1	Crathie Point, E of Cullen._x000D_SCOTLAND._x000D_Banff (96)	Banff (96)	NJ 549 674	SCOTLAND		"mica-schist" of dr horne; dolomitic				N	354900	867400	http://www.bgs.ac.uk/data/britrocks/britrocks.cfc?method=viewSamples&sampleId=278042	http://www.largeimages.bgs.ac.uk/iip/britrocks.html?id=120000/123511	http://www.largeimages.bgs.ac.uk/iip/britrocks.html?id=120000/123510
268233										0	S2248	2248	2248	2248	Geikie,A.	*	'Original entry: Mica Schist'	1	Bridge of Brown, 3 miles NW of Tomintoul._x000D_SCOTLAND._x000D_Tomintoul (75)	Tomintoul (75)	NJ 124 205	SCOTLAND		See memoir, p. 18				N	312400	820500	http://www.bgs.ac.uk/data/britrocks/britrocks.cfc?method=viewSamples&sampleId=268233	http://www.largeimages.bgs.ac.uk/iip/britrocks.html?id=120000/123513	http://www.largeimages.bgs.ac.uk/iip/britrocks.html?id=120000/123512
378268				X						0	S2253; S2253/a;	2253	2253	2253	Geikie,A.	*	'Original entry: Schistose Grit'	1	From Rothesay._x000D_SCOTLAND._x000D_Rothesay (29)	Rothesay (29)	NS 080 640	SCOTLAND		Schistose grit				N	208000	664000	http://www.bgs.ac.uk/data/britrocks/britrocks.cfc?method=viewSamples&sampleId=378268	http://www.largeimages.bgs.ac.uk/iip/britrocks.html?id=120000/123523	http://www.largeimages.bgs.ac.uk/iip/britrocks.html?id=120000/123522	http://www.largeimages.bgs.ac.uk/iip/britrocks.html?id=120000/123525	http://www.largeimages.bgs.ac.uk/iip/britrocks.html?id=120000/123524
378269				X						0	S2254	2254	2254	2254	Geikie,A.	*	'Original entry: (?)Graphite Schist'	1	From Rothesay._x000D_SCOTLAND._x000D_Rothesay (29)	Rothesay (29)	NS 080 640	SCOTLAND		(?)graphite schist				N	208000	664000	http://www.bgs.ac.uk/data/britrocks/britrocks.cfc?method=viewSamples&sampleId=378269	http://www.largeimages.bgs.ac.uk/iip/britrocks.html?id=120000/123527	http://www.largeimages.bgs.ac.uk/iip/britrocks.html?id=120000/123526
378270				X						0	S2255	2255	2255	2255	Geikie,A.	*	'Original entry: Shale'	1	From Rothesay._x000D_SCOTLAND._x000D_Rothesay (29)	Rothesay (29)	NS 080 640	SCOTLAND		Shale				N	208000	664000	http://www.bgs.ac.uk/data/britrocks/britrocks.cfc?method=viewSamples&sampleId=378270	http://www.largeimages.bgs.ac.uk/iip/britrocks.html?id=120000/123529	http://www.largeimages.bgs.ac.uk/iip/britrocks.html?id=120000/123528
270850										0	S2256	2256	2256	2256	Geikie,A.	*	'Original entry: Mica Schist'	1	Glen Logan, Loch Maree._x000D_SCOTLAND._x000D_Inverbroom (92)	Inverbroom (92)	NH 061 622	SCOTLAND		Above great thrust plane				N	206100	862200	http://www.bgs.ac.uk/data/britrocks/britrocks.cfc?method=viewSamples&sampleId=270850	http://www.largeimages.bgs.ac.uk/iip/britrocks.html?id=120000/123531	http://www.largeimages.bgs.ac.uk/iip/britrocks.html?id=120000/123530
270851										0	S2257	2257	2257	2257	Geikie,A.	*	'Original entry: Epidote Mica Schist'	1	Glen Logan, Loch Maree._x000D_SCOTLAND._x000D_Inverbroom (92)	Inverbroom (92)	NH 061 622	SCOTLAND		Above great thrust plane (moines)				N	206100	862200	http://www.bgs.ac.uk/data/britrocks/britrocks.cfc?method=viewSamples&sampleId=270851	http://www.largeimages.bgs.ac.uk/iip/britrocks.html?id=120000/123533	http://www.largeimages.bgs.ac.uk/iip/britrocks.html?id=120000/123532
270852										0	S2258	2258	2258	2258	Geikie,A.	*	'Original entry: Mylonite'	1	Glen Logan, Loch Maree._x000D_SCOTLAND._x000D_Inverbroom (92)	Inverbroom (92)	NH 060 623	SCOTLAND		Above great thrust plane (transition to moine schist)				N	206000	862300	http://www.bgs.ac.uk/data/britrocks/britrocks.cfc?method=viewSamples&sampleId=270852	http://www.largeimages.bgs.ac.uk/iip/britrocks.html?id=120000/123535	http://www.largeimages.bgs.ac.uk/iip/britrocks.html?id=120000/123534
270853										0	S2259	2259	2259	2259	Geikie,A.	*	'Original entry: Epidote Mica Schist'	1	Glen Logan, Loch Maree._x000D_SCOTLAND._x000D_Inverbroom (92)	Inverbroom (92)	NH 061 622	SCOTLAND		Above great thrust plane				N	206100	862200	http://www.bgs.ac.uk/data/britrocks/britrocks.cfc?method=viewSamples&sampleId=270853	http://www.largeimages.bgs.ac.uk/iip/britrocks.html?id=120000/123537	http://www.largeimages.bgs.ac.uk/iip/britrocks.html?id=120000/123536
270854										0	S2260	2260	2260	2260	Geikie,A.	*	'Original entry: Epidote Mica Schist'	1	Glen Logan, Loch Maree._x000D_SCOTLAND._x000D_Inverbroom (92)	Inverbroom (92)	NH 061 622	SCOTLAND		Above great thrust plane (moines)				N	206100	862200	http://www.bgs.ac.uk/data/britrocks/britrocks.cfc?method=viewSamples&sampleId=270854	http://www.largeimages.bgs.ac.uk/iip/britrocks.html?id=120000/123539	http://www.largeimages.bgs.ac.uk/iip/britrocks.html?id=120000/123538
266005										0	S2265; S2265/a;	2265	2265	2265	Geikie,A.	*	'Original entry: Mylonite'	1	From above Achnashellach._x000D_SCOTLAND._x000D_Lochcarron (82)	Lochcarron (82)	NH 007 496	SCOTLAND		Sandstone or micaschist?				N	200700	849600	http://www.bgs.ac.uk/data/britrocks/britrocks.cfc?method=viewSamples&sampleId=266005	http://www.largeimages.bgs.ac.uk/iip/britrocks.html?id=120000/123543	http://www.largeimages.bgs.ac.uk/iip/britrocks.html?id=120000/123542	http://www.largeimages.bgs.ac.uk/iip/britrocks.html?id=120000/123545	http://www.largeimages.bgs.ac.uk/iip/britrocks.html?id=120000/123544
266114										0	S2266	2266	2266	2266	Geikie,A.	*	'Original entry: Mylonite'	1	From above Achnashellach._x000D_SCOTLAND._x000D_Lochcarron (82)	Lochcarron (82)	NH 007 496	SCOTLAND		Sandstone or micaschist?				N	200700	849600	http://www.bgs.ac.uk/data/britrocks/britrocks.cfc?method=viewSamples&sampleId=266114	http://www.largeimages.bgs.ac.uk/iip/britrocks.html?id=120000/123547	http://www.largeimages.bgs.ac.uk/iip/britrocks.html?id=120000/123546
266115										0	S2268	2268	2268	2268	Geikie,A.	*	'Original entry: Mylonite'	1	From above Achnashellach._x000D_SCOTLAND._x000D_Lochcarron (82)	Lochcarron (82)	NH 007 496	SCOTLAND		Sandstone or micaschist?; see nw highland mem, p. 289				N	200700	849600	http://www.bgs.ac.uk/data/britrocks/britrocks.cfc?method=viewSamples&sampleId=266115	http://www.largeimages.bgs.ac.uk/iip/britrocks.html?id=120000/123549	http://www.largeimages.bgs.ac.uk/iip/britrocks.html?id=120000/123548
266116										0	S2269	2269	2269	2269	Geikie,A.	*	'Original entry: Mylonite'	1	From above Achnashellach._x000D_SCOTLAND._x000D_Lochcarron (82)	Lochcarron (82)	NH 007 496	SCOTLAND		Sandstone or micaschist?				N	200700	849600	http://www.bgs.ac.uk/data/britrocks/britrocks.cfc?method=viewSamples&sampleId=266116	http://www.largeimages.bgs.ac.uk/iip/britrocks.html?id=120000/123551	http://www.largeimages.bgs.ac.uk/iip/britrocks.html?id=120000/123550
266117										0	S2270	2270	2270	2270	Geikie,A.	*	'Original entry: Moine Schist'	1	Between Strome Ferry and Attadale._x000D_SCOTLAND._x000D_Lochcarron (82)	Lochcarron (82)	NG 90 37	SCOTLAND						N	190000	837000	http://www.bgs.ac.uk/data/britrocks/britrocks.cfc?method=viewSamples&sampleId=266117	http://www.largeimages.bgs.ac.uk/iip/britrocks.html?id=120000/123553	http://www.largeimages.bgs.ac.uk/iip/britrocks.html?id=120000/123552
266566										0	S2271	2271	2271	2271	Geikie,A.	*	'Original entry: Moine Schist'	1	Between Strome Ferry and Attadale._x000D_SCOTLAND._x000D_Lochcarron (82)	Lochcarron (82)	NG 90 37	SCOTLAND						N	190000	837000	http://www.bgs.ac.uk/data/britrocks/britrocks.cfc?method=viewSamples&sampleId=266566	http://www.largeimages.bgs.ac.uk/iip/britrocks.html?id=120000/123555	http://www.largeimages.bgs.ac.uk/iip/britrocks.html?id=120000/123554
266567										0	S2272	2272	2272	2272	Geikie,A.	*	'Original entry: Moine Schist'	1	Between Strome Ferry and Attadale._x000D_SCOTLAND._x000D_Lochcarron (82)	Lochcarron (82)	NG 90 37	SCOTLAND						N	190000	837000	http://www.bgs.ac.uk/data/britrocks/britrocks.cfc?method=viewSamples&sampleId=266567	http://www.largeimages.bgs.ac.uk/iip/britrocks.html?id=120000/123557	http://www.largeimages.bgs.ac.uk/iip/britrocks.html?id=120000/123556
266568										0	S2273; S2273/a;	2273	2273	2273	Geikie,A.	*	'Original entry: Moine Schist'	1	Between Strome Ferry and Attadale._x000D_SCOTLAND._x000D_Lochcarron (82)	Lochcarron (82)	NG 90 37	SCOTLAND						N	190000	837000	http://www.bgs.ac.uk/data/britrocks/britrocks.cfc?method=viewSamples&sampleId=266568	http://www.largeimages.bgs.ac.uk/iip/britrocks.html?id=120000/123559	http://www.largeimages.bgs.ac.uk/iip/britrocks.html?id=120000/123558	http://www.largeimages.bgs.ac.uk/iip/britrocks.html?id=120000/123561	http://www.largeimages.bgs.ac.uk/iip/britrocks.html?id=120000/123560
266569										0	S2274	2274	2274	2274	Geikie,A.	*	'Original entry: Moine Schist'	1	Between Strome Ferry and Attadale._x000D_SCOTLAND._x000D_Lochcarron (82)	Lochcarron (82)	NG 90 37	SCOTLAND						N	190000	837000	http://www.bgs.ac.uk/data/britrocks/britrocks.cfc?method=viewSamples&sampleId=266569	http://www.largeimages.bgs.ac.uk/iip/britrocks.html?id=120000/123563	http://www.largeimages.bgs.ac.uk/iip/britrocks.html?id=120000/123562
266570										0	S2275	2275	2275	2275	Geikie,A.	*	'Original entry: Moine Schist'	1	Between Strome Ferry and Attadale._x000D_SCOTLAND._x000D_Lochcarron (82)	Lochcarron (82)	NG 90 37	SCOTLAND						N	190000	837000	http://www.bgs.ac.uk/data/britrocks/britrocks.cfc?method=viewSamples&sampleId=266570	http://www.largeimages.bgs.ac.uk/iip/britrocks.html?id=120000/123565	http://www.largeimages.bgs.ac.uk/iip/britrocks.html?id=120000/123564
276447										0	S2281	2281	2281	2281	Geikie,A.	*	'Original entry: Mylonite'	1	NE of Creag na Faolinn, Loch Eriboll._x000D_SCOTLAND._x000D_Tongue (114)	Tongue (114)	NC 400 539	SCOTLAND		Pegmatite?				N	240000	953900	http://www.bgs.ac.uk/data/britrocks/britrocks.cfc?method=viewSamples&sampleId=276447	http://www.largeimages.bgs.ac.uk/iip/britrocks.html?id=120000/123577	http://www.largeimages.bgs.ac.uk/iip/britrocks.html?id=120000/123576
276448										0	S2282; S2282/A;	2282	2282	2282	Geikie,A.	*	'Original entry: Mylonite'	1	Knoll 0.25 mile or so ESE of Hope Lodge, Eriboll._x000D_SCOTLAND._x000D_Tongue (114)	Tongue (114)	NC 480 599	SCOTLAND		Pegmatite?				N	248000	959900	http://www.bgs.ac.uk/data/britrocks/britrocks.cfc?method=viewSamples&sampleId=276448	http://www.largeimages.bgs.ac.uk/iip/britrocks.html?id=120000/123579	http://www.largeimages.bgs.ac.uk/iip/britrocks.html?id=120000/123578	http://www.largeimages.bgs.ac.uk/iip/britrocks.html?id=120000/123581	http://www.largeimages.bgs.ac.uk/iip/britrocks.html?id=120000/123580
276449										0	S2283	2283	2283	2283	Geikie,A.	*	'Original entry: Mylonite'	1	Cliff 50 yds above road, 1 mile E of Hope Ferry._x000D_SCOTLAND._x000D_Tongue (114)	Tongue (114)	NC 485 605	SCOTLAND		Quartzite?				N	248500	960500	http://www.bgs.ac.uk/data/britrocks/britrocks.cfc?method=viewSamples&sampleId=276449	http://www.largeimages.bgs.ac.uk/iip/britrocks.html?id=120000/123583	http://www.largeimages.bgs.ac.uk/iip/britrocks.html?id=120000/123582
276450										0	S2284	2284	2284	2284	Geikie,A.	*	'Original entry: Amphibolite'	1	Knoll 0.25 mile ESE of Hope Lodge, Eriboll._x000D_SCOTLAND._x000D_Tongue (114)	Tongue (114)	NC 480 599	SCOTLAND		Epidotic				N	248000	959900	http://www.bgs.ac.uk/data/britrocks/britrocks.cfc?method=viewSamples&sampleId=276450	http://www.largeimages.bgs.ac.uk/iip/britrocks.html?id=120000/123585	http://www.largeimages.bgs.ac.uk/iip/britrocks.html?id=120000/123584
276451										0	S2285	2285	2285	2285	Geikie,A.	*	'Original entry: Mylonite'	1	Near Loch a'Choin Bhoirinn, Eriboll._x000D_SCOTLAND._x000D_Tongue (114)	Tongue (114)	NC 456 574	SCOTLAND		Augen structure				N	245600	957400	http://www.bgs.ac.uk/data/britrocks/britrocks.cfc?method=viewSamples&sampleId=276451	http://www.largeimages.bgs.ac.uk/iip/britrocks.html?id=120000/123587	http://www.largeimages.bgs.ac.uk/iip/britrocks.html?id=120000/123586
276452										0	S2286	2286	2286	2286	Geikie,A.	*	'Original entry: Crushed Gneiss'	1	On Sithean na Cuaig, Heilam, Eriboll._x000D_SCOTLAND._x000D_Tongue (114)	Tongue (114)	NC 456 600	SCOTLAND						N	245600	960000	http://www.bgs.ac.uk/data/britrocks/britrocks.cfc?method=viewSamples&sampleId=276452	http://www.largeimages.bgs.ac.uk/iip/britrocks.html?id=120000/123589	http://www.largeimages.bgs.ac.uk/iip/britrocks.html?id=120000/123588
276453										0	S2287	2287	2287	2287	Geikie,A.	*	'Original entry: Mylonite'	1	N face of Ben Arnaboll, Eriboll._x000D_SCOTLAND._x000D_Tongue (114)	Tongue (114)	NC 461 593	SCOTLAND						N	246100	959300	http://www.bgs.ac.uk/data/britrocks/britrocks.cfc?method=viewSamples&sampleId=276453	http://www.largeimages.bgs.ac.uk/iip/britrocks.html?id=120000/123591	http://www.largeimages.bgs.ac.uk/iip/britrocks.html?id=120000/123590
276454										0	S2288	2288	2288	2288	Geikie,A.	*	'Original entry: Mylonite Or Moine'	1	Allt na Raipe, 0.5 mile S of Hope Lodge, Eriboll._x000D_SCOTLAND._x000D_Tongue (114)	Tongue (114)	NC 477 591	SCOTLAND		"moines"				N	247700	959100	http://www.bgs.ac.uk/data/britrocks/britrocks.cfc?method=viewSamples&sampleId=276454	http://www.largeimages.bgs.ac.uk/iip/britrocks.html?id=120000/123593	http://www.largeimages.bgs.ac.uk/iip/britrocks.html?id=120000/123592
276455										0	S2289	2289	2289	2289	Geikie,A.	*	'Original entry: Mylonite'	1	Knoll overlooking Free Church, Eriboll._x000D_SCOTLAND._x000D_Tongue (114)	Tongue (114)	NC 439 570	SCOTLAND		?gneiss				N	243900	957000	http://www.bgs.ac.uk/data/britrocks/britrocks.cfc?method=viewSamples&sampleId=276455	http://www.largeimages.bgs.ac.uk/iip/britrocks.html?id=120000/123595	http://www.largeimages.bgs.ac.uk/iip/britrocks.html?id=120000/123594
276456										0	S2290	2290	2290	2290	Geikie,A.	*	'Original entry: Mylonite Or Moine'	1	Allt na Raipe, Hope, Eriboll._x000D_SCOTLAND._x000D_Tongue (114)	Tongue (114)	NC 477 591	SCOTLAND						N	247700	959100	http://www.bgs.ac.uk/data/britrocks/britrocks.cfc?method=viewSamples&sampleId=276456	http://www.largeimages.bgs.ac.uk/iip/britrocks.html?id=120000/123597	http://www.largeimages.bgs.ac.uk/iip/britrocks.html?id=120000/123596
276457										0	S2291	2291	2291	2291	Geikie,A.	*	'Original entry: ?'	1	Sangomore Bay, Durness._x000D_SCOTLAND._x000D_Tongue (114)	Tongue (114)	NC 41 67	SCOTLAND						N	241000	967000	http://www.bgs.ac.uk/data/britrocks/britrocks.cfc?method=viewSamples&sampleId=276457	http://www.largeimages.bgs.ac.uk/iip/britrocks.html?id=120000/123599	http://www.largeimages.bgs.ac.uk/iip/britrocks.html?id=120000/123598
276458										0	S2292	2292	2292	2292	Geikie,A.	*	'Original entry: Mylonite?'	1	Ben Arnaboll, Eriboll._x000D_SCOTLAND._x000D_Tongue (114)	Tongue (114)	NC 452 590	SCOTLAND						N	245200	959000	http://www.bgs.ac.uk/data/britrocks/britrocks.cfc?method=viewSamples&sampleId=276458	http://www.largeimages.bgs.ac.uk/iip/britrocks.html?id=120000/123601	http://www.largeimages.bgs.ac.uk/iip/britrocks.html?id=120000/123600
276459										0	S2293	2293	2293	2293	Geikie,A.	*	'Original entry: Mylonite'	1	0.5 mile W of Loch Hope, Eriboll._x000D_SCOTLAND._x000D_Tongue (114)	Tongue (114)		SCOTLAND						N			http://www.bgs.ac.uk/data/britrocks/britrocks.cfc?method=viewSamples&sampleId=276459	http://www.largeimages.bgs.ac.uk/iip/britrocks.html?id=120000/123603	http://www.largeimages.bgs.ac.uk/iip/britrocks.html?id=120000/123602
276460										0	S2294	2294	2294	2294	Geikie,A.	*	'Original entry: Moine Schist'	1	Crag SE of Hope shepherd's house, Eriboll._x000D_SCOTLAND._x000D_Tongue (114)	Tongue (114)	NC 482 576	SCOTLAND						N	248200	957600	http://www.bgs.ac.uk/data/britrocks/britrocks.cfc?method=viewSamples&sampleId=276460	http://www.largeimages.bgs.ac.uk/iip/britrocks.html?id=120000/123605	http://www.largeimages.bgs.ac.uk/iip/britrocks.html?id=120000/123604
276461										0	S2295	2295	2295	2295	Geikie,A.	*	'Original entry: Mylonite'	1	S of Ben Arnaboll, Eriboll._x000D_SCOTLAND._x000D_Tongue (114)	Tongue (114)	NC 45 58	SCOTLAND						N	245000	958000	http://www.bgs.ac.uk/data/britrocks/britrocks.cfc?method=viewSamples&sampleId=276461	http://www.largeimages.bgs.ac.uk/iip/britrocks.html?id=120000/123607	http://www.largeimages.bgs.ac.uk/iip/britrocks.html?id=120000/123606
276462										0	S2296	2296	2296	2296	Geikie,A.	*	'Original entry: Mylonite'	1	S of Ben Arnaboll, Eriboll._x000D_SCOTLAND._x000D_Tongue (114)	Tongue (114)	NC 45 58	SCOTLAND		Pegmatite?				N	245000	958000	http://www.bgs.ac.uk/data/britrocks/britrocks.cfc?method=viewSamples&sampleId=276462	http://www.largeimages.bgs.ac.uk/iip/britrocks.html?id=120000/123609	http://www.largeimages.bgs.ac.uk/iip/britrocks.html?id=120000/123608
276463										0	S2297	2297	2297	2297	Geikie,A.	*	'Original entry: Mylonite'	1	S of Ben Arnaboll, Eriboll._x000D_SCOTLAND._x000D_Tongue (114)	Tongue (114)	NC 45 58	SCOTLAND						N	245000	958000	http://www.bgs.ac.uk/data/britrocks/britrocks.cfc?method=viewSamples&sampleId=276463	http://www.largeimages.bgs.ac.uk/iip/britrocks.html?id=120000/123611	http://www.largeimages.bgs.ac.uk/iip/britrocks.html?id=120000/123610
276464										0	S2298; S2298/a;	2298	2298	2298	Geikie,A.	*	'Original entry: Mylonitic Schist'	1	Sangomore Bay, Durness._x000D_SCOTLAND._x000D_Tongue (114)	Tongue (114)	NC 407 677	SCOTLAND		Curly schist				N	240700	967700	http://www.bgs.ac.uk/data/britrocks/britrocks.cfc?method=viewSamples&sampleId=276464	http://www.largeimages.bgs.ac.uk/iip/britrocks.html?id=120000/123613	http://www.largeimages.bgs.ac.uk/iip/britrocks.html?id=120000/123612	http://www.largeimages.bgs.ac.uk/iip/britrocks.html?id=120000/123615	http://www.largeimages.bgs.ac.uk/iip/britrocks.html?id=120000/123614
276465										0	S2299	2299	2299	2299	Geikie,A.	*	'Original entry: Mylonite'	1	Sangomore Bay, Durness._x000D_SCOTLAND._x000D_Tongue (114)	Tongue (114)	NC 407 677	SCOTLAND						N	240700	967700	http://www.bgs.ac.uk/data/britrocks/britrocks.cfc?method=viewSamples&sampleId=276465	http://www.largeimages.bgs.ac.uk/iip/britrocks.html?id=120000/123617	http://www.largeimages.bgs.ac.uk/iip/britrocks.html?id=120000/123616
276466										0	S2300; S2300/A; S2300/B;	2300	2300	2300	Geikie,A.	*	'Original entry: Mylonite'	1	Bay W side of Whiten Head, L Eriboll._x000D_SCOTLAND._x000D_Tongue (114)	Tongue (114)	NC 498 684	SCOTLAND						N	249800	968400	http://www.bgs.ac.uk/data/britrocks/britrocks.cfc?method=viewSamples&sampleId=276466	http://www.largeimages.bgs.ac.uk/iip/britrocks.html?id=120000/123619	http://www.largeimages.bgs.ac.uk/iip/britrocks.html?id=120000/123618	http://www.largeimages.bgs.ac.uk/iip/britrocks.html?id=120000/123621	http://www.largeimages.bgs.ac.uk/iip/britrocks.html?id=120000/123620	http://www.largeimages.bgs.ac.uk/iip/britrocks.html?id=120000/123623	http://www.largeimages.bgs.ac.uk/iip/britrocks.html?id=120000/123622
276467										0	S2301; S2301/a;	2301	2301	2301	Geikie,A.	*	'Original entry: Mylonite'	1	E of Whiten Head, Loch Eriboll._x000D_SCOTLAND._x000D_Tongue (114)	Tongue (114)	NC 514 684	SCOTLAND						N	251400	968400	http://www.bgs.ac.uk/data/britrocks/britrocks.cfc?method=viewSamples&sampleId=276467	http://www.largeimages.bgs.ac.uk/iip/britrocks.html?id=120000/123625	http://www.largeimages.bgs.ac.uk/iip/britrocks.html?id=120000/123624	http://www.largeimages.bgs.ac.uk/iip/britrocks.html?id=120000/123627	http://www.largeimages.bgs.ac.uk/iip/britrocks.html?id=120000/123626
276468										0	S2302	2302	2302	2302	Geikie,A.	*	'Original entry: Quartzite'	1	Foinnbheinn (Foinaven) , Durness._x000D_SCOTLAND._x000D_Tongue (114)	Tongue (114)		SCOTLAND						N			http://www.bgs.ac.uk/data/britrocks/britrocks.cfc?method=viewSamples&sampleId=276468	http://www.largeimages.bgs.ac.uk/iip/britrocks.html?id=120000/123629	http://www.largeimages.bgs.ac.uk/iip/britrocks.html?id=120000/123628
276469										0	S2303	2303	2303	2303	Geikie,A.	*	'Original entry: Mylonitic Quartzite'	1	NE of Friesghill Shepherd's house, Eriboll._x000D_SCOTLAND._x000D_Tongue (114)	Tongue (114)		SCOTLAND						N			http://www.bgs.ac.uk/data/britrocks/britrocks.cfc?method=viewSamples&sampleId=276469	http://www.largeimages.bgs.ac.uk/iip/britrocks.html?id=120000/123631	http://www.largeimages.bgs.ac.uk/iip/britrocks.html?id=120000/123630
276470										0	S2304	2304	2304	2304	Geikie,A.	*	'Original entry: Mylonite'	1	Creag na Faoilinn, Loch Eriboll._x000D_SCOTLAND._x000D_Tongue (114)	Tongue (114)	NC 395 534	SCOTLAND		Quartzite				N	239500	953400	http://www.bgs.ac.uk/data/britrocks/britrocks.cfc?method=viewSamples&sampleId=276470	http://www.largeimages.bgs.ac.uk/iip/britrocks.html?id=120000/123633	http://www.largeimages.bgs.ac.uk/iip/britrocks.html?id=120000/123632
276471										0	S2305	2305	2305	2305	Geikie,A.	*	'Original entry: Mylonitic Quartzite'	1	Heilam, Loch Eriboll._x000D_SCOTLAND._x000D_Tongue (114)	Tongue (114)	NC 457 604	SCOTLAND						N	245700	960400	http://www.bgs.ac.uk/data/britrocks/britrocks.cfc?method=viewSamples&sampleId=276471	http://www.largeimages.bgs.ac.uk/iip/britrocks.html?id=120000/123635	http://www.largeimages.bgs.ac.uk/iip/britrocks.html?id=120000/123634
276472										0	S2306	2306	2306	2306	Geikie,A.	*	'Original entry: Mylonite'	1	Eriboll._x000D_SCOTLAND._x000D_Tongue (114)	Tongue (114)	NC 43 56	SCOTLAND						N	243000	956000	http://www.bgs.ac.uk/data/britrocks/britrocks.cfc?method=viewSamples&sampleId=276472	http://www.largeimages.bgs.ac.uk/iip/britrocks.html?id=120000/123637	http://www.largeimages.bgs.ac.uk/iip/britrocks.html?id=120000/123636
234088										0	S2307; S2307/a;	2307	2307	2307	Geikie,A.	*		0	From slopes overhanging Ben More Assynt._x000D_SCOTLAND._x000D_Altnaharra (108)	Altnaharra (108)	NC 348 206	SCOTLAND		Mylonite, crushed piped quartzite				N	234800	920600	http://www.bgs.ac.uk/data/britrocks/britrocks.cfc?method=viewSamples&sampleId=234088	http://www.largeimages.bgs.ac.uk/iip/britrocks.html?id=120000/123639	http://www.largeimages.bgs.ac.uk/iip/britrocks.html?id=120000/123638	http://www.largeimages.bgs.ac.uk/iip/britrocks.html?id=120000/123641	http://www.largeimages.bgs.ac.uk/iip/britrocks.html?id=120000/123640
276473										0	S2308	2308	2308	2308	Geikie,A.	*	'Original entry: Mica Schist'	1	W side of Loch Hope, Eriboll._x000D_SCOTLAND._x000D_Tongue (114)	Tongue (114)		SCOTLAND		"moines"				N			http://www.bgs.ac.uk/data/britrocks/britrocks.cfc?method=viewSamples&sampleId=276473	http://www.largeimages.bgs.ac.uk/iip/britrocks.html?id=120000/123643	http://www.largeimages.bgs.ac.uk/iip/britrocks.html?id=120000/123642
232063								X		3	S2352; S2352/a; COLLNORYF1537;	2352	2352	2352	Geikie,A.	*	'Original entry: Mylonitic Gneiss'	1	Claise Fearna, Loch Laxford._x000D_SCOTLAND._x000D_Lochinver (107)	Lochinver (107)	NC 20 47	SCOTLAND		2 slides, 2352 and 2352a				N	220000	947000	http://www.bgs.ac.uk/data/britrocks/britrocks.cfc?method=viewSamples&sampleId=232063	http://www.largeimages.bgs.ac.uk/iip/britrocks.html?id=120000/123703	http://www.largeimages.bgs.ac.uk/iip/britrocks.html?id=120000/123702	http://www.largeimages.bgs.ac.uk/iip/britrocks.html?id=120000/123705	http://www.largeimages.bgs.ac.uk/iip/britrocks.html?id=120000/123704
270855										0	S2405	2405	2405	2405	Geikie,A.	*	'Original entry: Mylonite Grit Or Gneiss'	1	1st thrust, Glen Logan, Loch Maree._x000D_SCOTLAND._x000D_Inverbroom (92)	Inverbroom (92)	NH 058 633	SCOTLAND		Probably grit				N	205800	863300	http://www.bgs.ac.uk/data/britrocks/britrocks.cfc?method=viewSamples&sampleId=270855	http://www.largeimages.bgs.ac.uk/iip/britrocks.html?id=120000/124329	http://www.largeimages.bgs.ac.uk/iip/britrocks.html?id=120000/124328
264912										0	S2447	2447	2447	2447	Geikie,A.	*	'Original entry: Muscovite-Biotite Gneiss'	1	Dalwhinnie Station._x000D_SCOTLAND._x000D_Glen Roy (63)	Glen Roy (63)	NN 634 849	SCOTLAND						N	263400	784900	http://www.bgs.ac.uk/data/britrocks/britrocks.cfc?method=viewSamples&sampleId=264912	http://www.largeimages.bgs.ac.uk/iip/britrocks.html?id=120000/124413	http://www.largeimages.bgs.ac.uk/iip/britrocks.html?id=120000/124412
375153				X						0	S2448	2448	2448	2448	Geikie,A.	*	'Original entry: Pitchstone'	1	Above South Corrygills._x000D_SCOTLAND._x000D_Arran (Millport) (21)	Arran (Millport) (21)	NS 030 340	SCOTLAND		Pitchstone				N	203000	634000	http://www.bgs.ac.uk/data/britrocks/britrocks.cfc?method=viewSamples&sampleId=375153	http://www.largeimages.bgs.ac.uk/iip/britrocks.html?id=120000/124415	http://www.largeimages.bgs.ac.uk/iip/britrocks.html?id=120000/124414
375591				X						0	S2449	2449	2449	2449	Geikie,A.	*	'Original entry: Pitchstone'	1	Above South Corrygills._x000D_SCOTLAND._x000D_Arran (Millport) (21)	Arran (Millport) (21)	NS 030 340	SCOTLAND		Pitchstone				N	203000	634000	http://www.bgs.ac.uk/data/britrocks/britrocks.cfc?method=viewSamples&sampleId=375591	http://www.largeimages.bgs.ac.uk/iip/britrocks.html?id=120000/124417	http://www.largeimages.bgs.ac.uk/iip/britrocks.html?id=120000/124416
375154				X						0	S2450	2450	2450	2450	Geikie,A.	*	'Original entry: Pitchstone'	1	Above South Corrygills._x000D_SCOTLAND._x000D_Arran (Millport) (21)	Arran (Millport) (21)	NS 030 340	SCOTLAND		Pitchstone				N	203000	634000	http://www.bgs.ac.uk/data/britrocks/britrocks.cfc?method=viewSamples&sampleId=375154	http://www.largeimages.bgs.ac.uk/iip/britrocks.html?id=120000/124419	http://www.largeimages.bgs.ac.uk/iip/britrocks.html?id=120000/124418
375007				X						0	S2451	2451	2451	2451	Geikie,A.	*	'Original entry: Pitchstone'	1	Caisteal Abhail._x000D_SCOTLAND._x000D_Arran (Millport) (21)	Arran (Millport) (21)	NR 960 440	SCOTLAND		Pitchstone				N	196000	644000	http://www.bgs.ac.uk/data/britrocks/britrocks.cfc?method=viewSamples&sampleId=375007	http://www.largeimages.bgs.ac.uk/iip/britrocks.html?id=120000/124421	http://www.largeimages.bgs.ac.uk/iip/britrocks.html?id=120000/124420
375008				X						0	S2452	2452	2452	2452	Geikie,A.	*	'Original entry: Pitchstone'	1	Caisteal Abhail._x000D_SCOTLAND._x000D_Arran (Millport) (21)	Arran (Millport) (21)	NR 960 440	SCOTLAND		Pitchstone				N	196000	644000	http://www.bgs.ac.uk/data/britrocks/britrocks.cfc?method=viewSamples&sampleId=375008	http://www.largeimages.bgs.ac.uk/iip/britrocks.html?id=120000/124423	http://www.largeimages.bgs.ac.uk/iip/britrocks.html?id=120000/124422
375046				X						0	S2453	2453	2453	2453	Geikie,A.	*	'Original entry: Pitchstone'	1	Schoolhouse, Brodick._x000D_SCOTLAND._x000D_Arran (Millport) (21)	Arran (Millport) (21)	NS 009 366	SCOTLAND		Pitchstone				N	200900	636600	http://www.bgs.ac.uk/data/britrocks/britrocks.cfc?method=viewSamples&sampleId=375046	http://www.largeimages.bgs.ac.uk/iip/britrocks.html?id=120000/124425	http://www.largeimages.bgs.ac.uk/iip/britrocks.html?id=120000/124424
375155				X						0	S2454	2454	2454	2454	Geikie,A.	*	'Original entry: Pitchstone'	1	Corrygills shore._x000D_SCOTLAND._x000D_Arran (Millport) (21)	Arran (Millport) (21)	NS 040 340	SCOTLAND		Pitchstone				N	204000	634000	http://www.bgs.ac.uk/data/britrocks/britrocks.cfc?method=viewSamples&sampleId=375155	http://www.largeimages.bgs.ac.uk/iip/britrocks.html?id=120000/124427	http://www.largeimages.bgs.ac.uk/iip/britrocks.html?id=120000/124426
375552				X						0	S2455	2455	2455	2455	Geikie,A.	*	'Original entry: Quartz Porphyry'	1	Kings Cave._x000D_SCOTLAND._x000D_Arran (Millport) (21)	Arran (Millport) (21)	NR 883 309	SCOTLAND		Quartz porphyry				N	188300	630900	http://www.bgs.ac.uk/data/britrocks/britrocks.cfc?method=viewSamples&sampleId=375552	http://www.largeimages.bgs.ac.uk/iip/britrocks.html?id=120000/124429	http://www.largeimages.bgs.ac.uk/iip/britrocks.html?id=120000/124428
375156				X						0	S2456	2456	2456	2456	Geikie,A.	*	'Original entry: Quartz Porphyry'	1	Dun Dubh, Corrygills._x000D_SCOTLAND._x000D_Arran (Millport) (21)	Arran (Millport) (21)	NS 038 342	SCOTLAND		Quartz porphyry				N	203800	634200	http://www.bgs.ac.uk/data/britrocks/britrocks.cfc?method=viewSamples&sampleId=375156	http://www.largeimages.bgs.ac.uk/iip/britrocks.html?id=120000/124431	http://www.largeimages.bgs.ac.uk/iip/britrocks.html?id=120000/124430
375592				X						0	S2457	2457	2457	2457	Geikie,A.	*	'Original entry: Granite'	1	Dun Dubh, Corrygills._x000D_SCOTLAND._x000D_Arran (Millport) (21)	Arran (Millport) (21)	NS 038 342	SCOTLAND		Granite				N	203800	634200	http://www.bgs.ac.uk/data/britrocks/britrocks.cfc?method=viewSamples&sampleId=375592	http://www.largeimages.bgs.ac.uk/iip/britrocks.html?id=120000/124433	http://www.largeimages.bgs.ac.uk/iip/britrocks.html?id=120000/124432
375146				X						0	S2458	2458	2458	2458	Geikie,A.	*	'Original entry: Quartz Dolerite (Granophyric)'	1	N side of Glen Dubh._x000D_SCOTLAND._x000D_Arran (Millport) (21)	Arran (Millport) (21)	NR 970 330	SCOTLAND		Quartz dolerite (granophyric)				N	197000	633000	http://www.bgs.ac.uk/data/britrocks/britrocks.cfc?method=viewSamples&sampleId=375146	http://www.largeimages.bgs.ac.uk/iip/britrocks.html?id=120000/124435	http://www.largeimages.bgs.ac.uk/iip/britrocks.html?id=120000/124434
375047				X						0	S2459	2459	2459	2459	Geikie,A.	*	'Original entry: Altered Sandstone'	1	E of Brodick Pier._x000D_SCOTLAND._x000D_Arran (Millport) (21)	Arran (Millport) (21)	NS 020 350	SCOTLAND		Altered sandstone, from side of dyke				N	202000	635000	http://www.bgs.ac.uk/data/britrocks/britrocks.cfc?method=viewSamples&sampleId=375047	http://www.largeimages.bgs.ac.uk/iip/britrocks.html?id=120000/124437	http://www.largeimages.bgs.ac.uk/iip/britrocks.html?id=120000/124436
374987				X						0	S2460	2460	2460	2460	Geikie,A.	*	'Original entry: Granite And Andalusite Hornfels'	1	N of Glen Sannox._x000D_SCOTLAND._x000D_Arran (Millport) (21)	Arran (Millport) (21)	NR 990 450	SCOTLAND		Granite and andalusite hornfels, granite contact				N	199000	645000	http://www.bgs.ac.uk/data/britrocks/britrocks.cfc?method=viewSamples&sampleId=374987	http://www.largeimages.bgs.ac.uk/iip/britrocks.html?id=120000/124439	http://www.largeimages.bgs.ac.uk/iip/britrocks.html?id=120000/124438
374988				X						0	S2461	2461	2461	2461	Geikie,A.	*	'Original entry: Granite And Andalusite Hornfels'	1	N of Glen Sannox._x000D_SCOTLAND._x000D_Arran (Millport) (21)	Arran (Millport) (21)	NR 990 450	SCOTLAND		Granite and andalusite hornfels, granite contact				N	199000	645000	http://www.bgs.ac.uk/data/britrocks/britrocks.cfc?method=viewSamples&sampleId=374988	http://www.largeimages.bgs.ac.uk/iip/britrocks.html?id=120000/124441	http://www.largeimages.bgs.ac.uk/iip/britrocks.html?id=120000/124440
375589				X						0	S2462	2462	2462	2462	Geikie,A.	*	'Original entry: Quartz Diorite'	1	Ploverfield, N side of Glen Dubh._x000D_SCOTLAND._x000D_Arran (Millport) (21)	Arran (Millport) (21)	NR 970 330	SCOTLAND		Quartz diorite				N	197000	633000	http://www.bgs.ac.uk/data/britrocks/britrocks.cfc?method=viewSamples&sampleId=375589	http://www.largeimages.bgs.ac.uk/iip/britrocks.html?id=120000/124443	http://www.largeimages.bgs.ac.uk/iip/britrocks.html?id=120000/124442
375330				X						0	S2463	2463	2463	2463	Geikie,A.	*	'Original entry: Diabase'	1	S of Millstone Point._x000D_SCOTLAND._x000D_Arran (Millport) (21)	Arran (Millport) (21)		SCOTLAND		Diabase				N			http://www.bgs.ac.uk/data/britrocks/britrocks.cfc?method=viewSamples&sampleId=375330	http://www.largeimages.bgs.ac.uk/iip/britrocks.html?id=120000/124445	http://www.largeimages.bgs.ac.uk/iip/britrocks.html?id=120000/124444
370596										0	S2464	2464	2464	2464	Geikie,A.	*	'Original entry: Biotite Granite'	1	Loch Etive._x000D_SCOTLAND._x000D_Oban (45)	Oban (45)	NN 0 3	SCOTLAND		Boulder				N	200000	730000	http://www.bgs.ac.uk/data/britrocks/britrocks.cfc?method=viewSamples&sampleId=370596	http://www.largeimages.bgs.ac.uk/iip/britrocks.html?id=120000/124447	http://www.largeimages.bgs.ac.uk/iip/britrocks.html?id=120000/124446
370597										0	S2465	2465	2465	2465	Geikie,A.	*	'Original entry: Hornblende-Biotite Granite'	1	Bonawe Granite, 9 miles NE of Oban._x000D_SCOTLAND._x000D_Oban (45)	Oban (45)	NN 014 334	SCOTLAND		Building stone				N	201400	733400	http://www.bgs.ac.uk/data/britrocks/britrocks.cfc?method=viewSamples&sampleId=370597	http://www.largeimages.bgs.ac.uk/iip/britrocks.html?id=120000/124449	http://www.largeimages.bgs.ac.uk/iip/britrocks.html?id=120000/124448
371862				X						0	S2466	2466	2466	2466	Geikie,A.	*		0	Near Ferry House, Kerrera._x000D_SCOTLAND._x000D_Mull (44)	Mull (44)	NM 830 286	SCOTLAND		Dyke (perhaps wrongly located)				N	183000	728600	http://www.bgs.ac.uk/data/britrocks/britrocks.cfc?method=viewSamples&sampleId=371862	http://www.largeimages.bgs.ac.uk/iip/britrocks.html?id=120000/124451	http://www.largeimages.bgs.ac.uk/iip/britrocks.html?id=120000/124450
371863				X						0	S2467	2467	2467	2467	Geikie,A.	*	'Original entry: Grit'	1	E side of Kerrera._x000D_SCOTLAND._x000D_Mull (44)	Mull (44)	NM 828 287	SCOTLAND		Lower ors				N	182800	728700	http://www.bgs.ac.uk/data/britrocks/britrocks.cfc?method=viewSamples&sampleId=371863	http://www.largeimages.bgs.ac.uk/iip/britrocks.html?id=120000/124453	http://www.largeimages.bgs.ac.uk/iip/britrocks.html?id=120000/124452
370598										0	S2468	2468	2468	2468	Geikie,A.	*	'Original entry: Enstatite Andesite'	1	From S Connel Ferry._x000D_SCOTLAND._x000D_Oban (45)	Oban (45)	NM 909 344	SCOTLAND						N	190900	734400	http://www.bgs.ac.uk/data/britrocks/britrocks.cfc?method=viewSamples&sampleId=370598	http://www.largeimages.bgs.ac.uk/iip/britrocks.html?id=120000/124455	http://www.largeimages.bgs.ac.uk/iip/britrocks.html?id=120000/124454
370599										0	S2469	2469	2469	2469	Geikie,A.	*	'Original entry: Olivine-Dolerite'	1	From S Connel Ferry._x000D_SCOTLAND._x000D_Oban (45)	Oban (45)	NM 909 340	SCOTLAND		?tertiary				N	190900	734000	http://www.bgs.ac.uk/data/britrocks/britrocks.cfc?method=viewSamples&sampleId=370599	http://www.largeimages.bgs.ac.uk/iip/britrocks.html?id=120000/124457	http://www.largeimages.bgs.ac.uk/iip/britrocks.html?id=120000/124456
371864				X						0	S2470	2470	2470	2470	Geikie,A.	*	'Original entry: Basalt'	1	From near Ferry House, Kerrera (dyke in black shale)._x000D_SCOTLAND._x000D_Mull (44)	Mull (44)	NM 823 277	SCOTLAND		Nw dyke				N	182300	727700	http://www.bgs.ac.uk/data/britrocks/britrocks.cfc?method=viewSamples&sampleId=371864	http://www.largeimages.bgs.ac.uk/iip/britrocks.html?id=120000/124459	http://www.largeimages.bgs.ac.uk/iip/britrocks.html?id=120000/124458
371865				X						0	S2471	2471	2471	2471	Geikie,A.	*	'Original entry: Dolerite'	1	W side of Kerrera (intrusive bed)._x000D_SCOTLAND._x000D_Mull (44)	Mull (44)	NM 789 275	SCOTLAND		Dolertie sill 4 ft				N	178900	727500	http://www.bgs.ac.uk/data/britrocks/britrocks.cfc?method=viewSamples&sampleId=371865	http://www.largeimages.bgs.ac.uk/iip/britrocks.html?id=120000/124461	http://www.largeimages.bgs.ac.uk/iip/britrocks.html?id=120000/124460
371030				X						0	S2472	2472	2472	2472	Geikie,A.	*	'Original entry: Olivine-Basalt'	1	W side of Kerrera columnar porphyrite)._x000D_SCOTLAND._x000D_Mull (44)	Mull (44)	NM 79 27	SCOTLAND		"andesite" lava ors; pre-tertiary mem, p. 24; trans geol soc glasg, vol. 20, pp. 253-259				N	179000	727000	http://www.bgs.ac.uk/data/britrocks/britrocks.cfc?method=viewSamples&sampleId=371030	http://www.largeimages.bgs.ac.uk/iip/britrocks.html?id=120000/124463	http://www.largeimages.bgs.ac.uk/iip/britrocks.html?id=120000/124462
371873				X						0	S2473	2473	2473	2473	Geikie,A.	*	'Original entry: Olivine-Basalt'	1	W side of Kerrera (columnar porphyrite)._x000D_SCOTLAND._x000D_Mull (44)	Mull (44)	NM 79 27	SCOTLAND		"andesite" lava ors; pre-tertiary mem, p. 24; trans geol soc glasg, vol. 20, pp. 253-259				N	179000	727000	http://www.bgs.ac.uk/data/britrocks/britrocks.cfc?method=viewSamples&sampleId=371873	http://www.largeimages.bgs.ac.uk/iip/britrocks.html?id=120000/124465	http://www.largeimages.bgs.ac.uk/iip/britrocks.html?id=120000/124464
370600										0	S2474	2474	2474	2474	Geikie,A.	*	'Original entry: Grit'	1	From S Connel Ferry._x000D_SCOTLAND._x000D_Oban (45)	Oban (45)	NM 923 343	SCOTLAND		From blocks in schistose conglomerate				N	192300	734300	http://www.bgs.ac.uk/data/britrocks/britrocks.cfc?method=viewSamples&sampleId=370600	http://www.largeimages.bgs.ac.uk/iip/britrocks.html?id=120000/124467	http://www.largeimages.bgs.ac.uk/iip/britrocks.html?id=120000/124466
370601										0	S2475	2475	2475	2475	Geikie,A.	*	'Original entry: Fused Grit?'	1	From S Connel Ferry._x000D_SCOTLAND._x000D_Oban (45)	Oban (45)	NM 923 343	SCOTLAND						N	192300	734300	http://www.bgs.ac.uk/data/britrocks/britrocks.cfc?method=viewSamples&sampleId=370601	http://www.largeimages.bgs.ac.uk/iip/britrocks.html?id=120000/124469	http://www.largeimages.bgs.ac.uk/iip/britrocks.html?id=120000/124468
360374				X						0	S2616	2616	2616	2616	Geikie,A.	*	'Original entry: Ophitic Dolerite'	1	Eigg harbour._x000D_SCOTLAND._x000D_Rum (60)	Rum (60)	NM 481 841	SCOTLAND						N	148100	784100	http://www.bgs.ac.uk/data/britrocks/britrocks.cfc?method=viewSamples&sampleId=360374	http://www.largeimages.bgs.ac.uk/iip/britrocks.html?id=120000/124719	http://www.largeimages.bgs.ac.uk/iip/britrocks.html?id=120000/124718
371874				X						0	S2617	2617	2617	2617	Cadell, Henry Moubray; Geikie,A.;	*; *;	'Original entry: Ophitic Olivine-Dolerite'	1	East of Carsaig (plateau basalt)._x000D_SCOTLAND._x000D_Mull (44)	Mull (44)	NM 54 21	SCOTLAND		Lava; augite purple-edged, some feldspar albitised				N	154000	721000	http://www.bgs.ac.uk/data/britrocks/britrocks.cfc?method=viewSamples&sampleId=371874	http://www.largeimages.bgs.ac.uk/iip/britrocks.html?id=120000/124721	http://www.largeimages.bgs.ac.uk/iip/britrocks.html?id=120000/124720
371875				X						0	S2618	2618	2618	2618	Cadell, Henry Moubray; Geikie,A.;	*; *;	'Original entry: Olivine-Bassalt'	1	From the shore at Kinloch Scridain (plateau bassalt)._x000D_SCOTLAND._x000D_Mull (44)	Mull (44)	NM 535 284	SCOTLAND		Intrusion				N	153500	728400	http://www.bgs.ac.uk/data/britrocks/britrocks.cfc?method=viewSamples&sampleId=371875	http://www.largeimages.bgs.ac.uk/iip/britrocks.html?id=120000/124723	http://www.largeimages.bgs.ac.uk/iip/britrocks.html?id=120000/124722
371876				X						0	S2619	2619	2619	2619	Cadell, Henry Moubray; Geikie,A.;	*; *;	'Original entry: Micro-Ophitic Olivine-Basalt'	1	South of Duart Castle (plateau basalt)._x000D_SCOTLAND._x000D_Mull (44)	Mull (44)	NM 749 350	SCOTLAND		Lava, approaches mugearite				N	174900	735000	http://www.bgs.ac.uk/data/britrocks/britrocks.cfc?method=viewSamples&sampleId=371876	http://www.largeimages.bgs.ac.uk/iip/britrocks.html?id=120000/124725	http://www.largeimages.bgs.ac.uk/iip/britrocks.html?id=120000/124724
371877				X						0	S2620	2620	2620	2620	Cadell, Henry Moubray; Geikie,A.;	*; *;	'Original entry: Olivine-Dolerite'	1	Kinloch Scridain (plateau basalt)._x000D_SCOTLAND._x000D_Mull (44)	Mull (44)	NM 534 284	SCOTLAND		Lava, coarse, feldspathic; augite strongly coloured				N	153400	728400	http://www.bgs.ac.uk/data/britrocks/britrocks.cfc?method=viewSamples&sampleId=371877	http://www.largeimages.bgs.ac.uk/iip/britrocks.html?id=120000/124727	http://www.largeimages.bgs.ac.uk/iip/britrocks.html?id=120000/124726
[truncated: 626 more rows]

## Sheet: E
ID_FIELD	MINORSAMPLENO_OFFSET	SAMPLE_NUMBERS	SAMPLE_DONOR_	ROCK_NAME	LOCALITY_DETAILS	SHEET_50K	MAP_REFERENCE	COUNTRY	STRATIGRAPHY	COMMENTS	YEAR_COLLECTED	EASTING	NORTHING	LINK TO BRITROCKS ENTRY	LINK TO PLANE POLARISED IMAGE	LINK TO CROSSED POLARS IMAGE	LINK TO PLANE POLARISED IMAGE (Second slide)	LINK TO CROSSED POLARS IMAGE (Second Slide)	LINK TO PLANE POLARISED IMAGE (Third slide)	LINK TO CROSSED POLARS IMAGE (Third Slide)
[truncated: 360 more rows]

[truncated: 1 more sheets: MR]
